# Supplementary material for: The hologenome of Osedax frankpressi reveals the genetic interplay for the symbiotic digestion of vertebrate bone
Source: bioRxiv preprint, doi:10.1101/2022.08.04.502725, version 1 (2022-08-05)
Supplement: Supplementary Tables 4, 8-13, 15-24 [file 502725_file03.xlsx]

## Sheet: Supp Table 4
Supplementary Table 14. List of manually curated missing BUSCO genes in O. frankpressi
Busco_IDs	Blast	Blast_Oasisia	Panther	Panther_ID	Panther_annotation
121127at33208a	OFRAG00000003732.1	OFRAG00000003732.1	OFRAG00000003732.1	PTHR22767:SF3	N-ALPHA-ACETYLTRANSFERASE 25, NATB AUXILIARY SUBUNIT
157138at33208a	OFRAG00000003231.1	OFRAG00000003231.1	OFRAG00000003231.1	PTHR13109	NEUROCHONDRIN
239149at33208a		OFRAG00000011677.1		PTHR13014	MITOCHONDRIAL 28S RIBOSOMAL PROTEIN S30/P52 PRO-APOTOTIC PROTEIN
257339at33208a	OFRAG00000016843.1	OFRAG00000016843.1	OFRAG00000016843.1	PTHR13244	ZINC FINGER MYND DOMAIN CONTAINING PROTEIN 10
289235at33208a	OFRAG00000006548.1	OFRAG00000006548.1	OFRAG00000006548.1	PTHR31322	E3 UBIQUITIN-PROTEIN LIGASE TM129
345959at33208a			OFRAG00000010598.1	PTHR13255	ATAXIN-10
361216at33208a	OFRAG00000012881.1	OFRAG00000004684.1, OFRAG00000012881.1, OFRAG00000015586.1, OFRAG00000003092.1	OFRAG00000004684.1	PTHR46432	F-BOX ONLY PROTEIN 42
367596at33208a	OFRAG00000004751.1		OFRAG00000004751.1	PTHR13710:SF108	ATP-DEPENDENT DNA HELICASE Q4
383313at33208a	OFRAG00000014167.1	OFRAG00000014167.1	OFRAG00000014167.1	PTHR13134:SF3	TRAFFICKING PROTEIN PARTICLE COMPLEX SUBUNIT 13
399439at33208a	OFRAG00000004444.1	OFRAG00000004444.1	OFRAG00000004444.1	PTHR16288	WD40 REPEAT PROTEIN 4
40200at33208a	OFRAG00000003558.1			PTHR45990	DNA REPAIR PROTEIN REV1
432287at33208a	OFRAG00000001898.1			PTHR12172:SF2	CELL CYCLE CHECKPOINT PROTEIN RAD17
443518at33208a	OFRAG00000013235.1	OFRAG00000013235.1, OFRAG00000007006.1		PTHR46803:SF2	E3 UBIQUITIN-PROTEIN LIGASE CHIP
448514at33208a		OFRAG00000013716.1, OFRAG00000013716.1, OFRAG00000004653.1		PTHR14588	DDB1- AND CUL4-ASSOCIATED FACTOR 10
453056at33208a	OFRAG00000010690.1	OFRAG00000010690.1	OFRAG00000010690.1	PTHR10758:SF1	COP9 SIGNALOSOME COMPLEX SUBUNIT 3
470197at33208a	OFRAG00000015929.1	OFRAG00000015929.1	OFRAG00000015929.1	PTHR14494	ALADIN/ADRACALIN/AAAS
488559at33208a		OFRAG00000006415.1	OFRAG00000006415.1	PTHR13022:SF2	EUKARYOTIC TRANSLATION INITIATION FACTOR 3 SUBUNIT K
495329at33208a	OFRAG00000000970.1	OFRAG00000015370.1	OFRAG00000015370.1	PTHR11953:SF1	EXOSOME COMPLEX COMPONENT RRP46
552764at33208a	OFRAG00000003761.1	OFRAG00000002773.1, OFRAG00000003719.1, OFRAG00000003761.1, OFRAG00000006172.1, OFRAG00000003719.2		PTHR24073:SF209	RAS-RELATED PROTEIN RAB-23
560566at33208a	OFRAG00000015326.1	OFRAG00000015326.1	OFRAG00000015326.1	PTHR17250	NEGATIVE ELONGATION FACTOR E
575360at33208a	OFRAG00000008602.1	OFRAG00000008602.1	OFRAG00000008602.1	PTHR13410	PROTEIN PBDC1
576997at33208a	OFRAG00000002648.1	OFRAG00000002648.1	OFRAG00000002648.1	PTHR12861:SF3	TRANSLOCON-ASSOCIATED PROTEIN SUBUNIT BETA
582951at33208a	OFRAG00000008432.1	OFRAG00000008432.1, OFRAG00000008432.2	OFRAG00000008432.1, OFRAG00000008432.2	PTHR15588:SF8	U6 SNRNA-ASSOCIATED SM-LIKE PROTEIN LSM1
584333at33208a	OFRAG00000009517.1	OFRAG00000009517.1, OFRAG00000009519.1	OFRAG00000009517.1, OFRAG00000009519.1	PTHR31634	BLOC-1-RELATED COMPLEX SUBUNIT 5
585313at33208a	OFRAG00000003552.1	OFRAG00000003552.1	OFRAG00000003552.1	PTHR23249:SF15	TRAFFICKING PROTEIN PARTICLE COMPLEX SUBUNIT 4
99987at33208a	OFRAG00000010572.1	OFRAG00000013224.1, OFRAG00000010572.1, OFRAG00000000121.1, OFRAG00000007896.1, OFRAG00000013716.1	OFRAG00000002452.1, OFRAG00000015405.1	PTHR19853:SF0	WD REPEAT-CONTAINING PROTEIN 3
226335at33208a				PTHR11056	HOMOGENTISATE 1,2-DIOXYGENASE
268134at33208a				PTHR46028:SF2	KYNURENINE 3-MONOOXYGENASE
302921at33208a				PTHR15960:SF2	UBIQUITIN-ASSOCIATED PROTEIN 1
344611at33208a				PTHR13299:SF0	PEROXISOMAL MEMBRANE PROTEIN PEX16
346541at33208a				PTHR12693	MENIN
381303at33208a				PTHR28080:SF1	PEROXISOMAL BIOGENESIS FACTOR 3
390402at33208a				PTHR46466	GLYOXALASE DOMAIN-CONTAINING PROTEIN 4
423848at33208a				PTHR12498	N-TERMINAL ASPARAGINE AMIDOHYDROLASE
424569at33208a				PTHR12161:SF56	IST1 HOMOLOG
462897at33208a				PTHR43429:SF2	PYRIDINE NUCLEOTIDE-DISULFIDE OXIDOREDUCTASE DOMAIN-CONTAINING PROTEIN 1
464243at33208a				PTHR21561:SF12	INO80 COMPLEX SUBUNIT B
467142at33208a				PTHR12874:SF9	F-BOX ONLY PROTEIN 9
477052at33208a				PTHR13929:SF0	UBIA PRENYLTRANSFERASE DOMAIN-CONTAINING PROTEIN 1
480700at33208a				PTHR10741:SF5	TRANSLIN-ASSOCIATED PROTEIN X
493505at33208a				PTHR10640	METHYLTHIORIBULOSE-1-PHOSPHATE DEHYDRATASE
502584at33208a				PTHR21142	SARCOGLYCANS
517686at33208a				PTHR13861:SF2	V-TYPE PROTON ATPASE SUBUNIT F
518635at33208a				PTHR11937:SF13	ACTIN-RELATED PROTEIN 8
536251at33208a				PTHR13101	PHOSPHOMEVALONATE KINASE
543269at33208a				PTHR22769	MUTT/NUDIX HYDROLASE
551632at33208a				PTHR10741:SF2	TRANSLIN
561248at33208a				PTHR13556	TRANSCRIPTIONAL ADAPTER 3-RELATED
569878at33208a				PTHR10252:SF91	NUCLEAR TRANSCRIPTION FACTOR Y SUBUNIT GAMMA
585726at33208a				PTHR23290	UNCHARACTERIZED
589773at33208a				PTHR19965:SF71	POLYMERASE DELTA-INTERACTING PROTEIN 3
590221at33208a				PTHR15561:SF0	DNA-DIRECTED RNA POLYMERASE III SUBUNIT RPC9
590347at33208a				PTHR13628	UNCHARACTERIZED
600823at33208a				PTHR10142	DNA REPAIR PROTEIN COMPLEMENTING XP-A CELLS
601967at33208a				PTHR44500	DNAJ HOMOLOG SUBFAMILY C MEMBER 12
602089at33208a				PTHR10705:SF0	DOLICHYL-DIPHOSPHOOLIGOSACCHARIDE--PROTEIN GLYCOSYLTRANSFERASE SUBUNIT DAD1
602148at33208a				PTHR13276	GUANINE NUCLEOTIDE EXCHANGE FACTOR MSS4
631662at33208a				PTHR10114:SF23	60S RIBOSOMAL PROTEIN L36
634447at33208a				PTHR13385:SF5	UBIQUITIN-LIKE PROTEIN ATG12
638541at33208a				PTHR31200	INO80 COMPLEX SUBUNIT C
640187at33208a				PTHR11129:SF3	PROTEIN PRENYLTRANSFERASE ALPHA SUBUNIT REPEAT-CONTAINING PROTEIN 1
644034at33208a				PTHR31077:SF5	U4/U6.U5 SMALL NUCLEAR RIBONUCLEOPROTEIN 27 KDA PROTEIN

## Sheet: Supp Table 8
Supplementary Table 8. Species and genomes used for gene family evolutionary analyses
Species	Clade	Genome/Annotation	Source	No NR proteins	BUSCO present
N. vectensis	Cnidaria	Nematostella_vectensis.ASM20922v1.46.gff3	Ensembl	24688	0.897
S. kowalevskii	Hemichordata	SkowalevskiiJGIv3.0.longestTrs.gff3	OIST	34238	0.936
S. purpuratus	Echinodermata	Strongylocentrotus_purpuratus.Spur_3.1.46.gff3	Ensembl	21231	0.719
B. lanceolatum	Chordata	Branchiostoma_lanceolatum.BraLan2.46.gff3	Ensembl	35732	0.745
L. oculatus	Chordata	Lepisosteus_oculatus.LepOcu1.dna.toplevel.fa	Ensembl	18328	0.933
H. sapiens	Chordata	Homo_sapiens.GRCh38.dna.toplevel.fa	Ensembl	19501	0.979
S. maritima	Ecdysozoa	Strigamia_maritima.Smar1.46.gff3	Ensembl	14977	0.902
T. castaneum	Ecdysozoa	Tribolium_castaneum.Tcas5.2.46.gff3	Ensembl	16557	0.98
O. fusiformis	Annelida	Owenia_annotation_v250920.gff3	Own	30840	0.962
C. teleta	Annelida	Capitella_teleta.Capitella_teleta_v1.0.46.gff3	Ensembl	32115	0.95
D. gyrociliatus	Annelida	Dgy_annot.gtf (converted to gff with gffread)	Own	14182	0.922
L. luymesi	Annelida	Lamellibrachia_gitRepo.gff3	GitHub repo of paper	39303	0.934
H. robusta	Annelida	Helobdella_robusta.Helro1.46.gff3	Ensembl	23359	0.902
E. andrei	Annelida	GWHACBE00000000.gff	Genome Warehouse	30851	0.899
O. frankpressi	Annelida	osedax_lociMerged_longestIsoform.gff (Dec2020)	Own	18024	0.916
O. alvinae	Annelida	oasisia_lociMerged_longestIsoform.gff (Dec2020)	Own	35862	0.979
R. pachyptila	Annelida	riftia_lociMerged_longestIsoform.gff (Dec2020)	Own	37037	0.968
P. echinospica	Annelida	Pec_genes_v1.0.gff	NCBI	22642	0.814
S. mediterranea	Platyhelminthes	smes_v2_hconf_SMESG.gff3	PlanMine	30885	0.777
N. geniculatus	Nemertea	nge_genome_v2.0.gff	OIST	43054	0.936
L. anatina	Brachiopoda	lan_genome_v2.0.gff	OIST	29771	0.967
P. australis	Phoronida	pau_genome_v2.0.gff	OIST	20393	0.963
C. gigas	Mollusca	Crassostrea_gigas.oyster_v9.46.gff3	Ensembl	26089	0.807
L. gigantea	Mollusca	Lottia_gigantea.Lotgi1.46.gff3	Ensembl	23256	0.966
M. yessoensis	Mollusca	GCF_002113885.1_ASM211388v2_genomic.gff	NCBI	24434	0.977
B. platifrons	Mollusca	Bpl_v1.0.fasta / Bpl_maker_v1.0.gff	Dryad repo	33581	0.772
G. aegis	Mollusca	Gae_Host.gff	Repo of paper	21491	0.805
H. miamia	Acoela	Hofstenia_miamia.HmiaM1.46.gff3	Ensembl	22454	0.795

## Sheet: Supp Table 9
Supplementary Table 9. Proteins present in newly sequenced Oceanospirillales, absent in the previsouly published Rs1 genome
95 protein coding genes in total
Number of proteins	Annotation
31	Type 6i secretion system proteins
22	Transposases
5	T5SS-like NPXG filamentous hemagglutinin family N-terminal domain protein
4	ABC-type amino acid transport signal transduction systems periplasmic component domain
3	Folic acid / CA2 binding protien
2	Addiction molecule HigA
2	nucleotidyltransferase substrate binding protein
2	Glycosyltransferase involved in cell wall biogenesis
2	ABC-type phosphonate transporter
2	HTH gluconate operon transcriptional repressor
2	TRAP-type mannitol chloroaromatic compound transport system, large permease component
2	Type 2 toxin-antitoxin system RelE/ParE family
2	IstB-like ATP binding protein
2	NCS1 nucleoside transporter
2	C4-dicarboxylate transport system permease DctM
2	BrnA antitoxin family protein
2	Toxin-like protein
2	Putative protein transport channel
2	Lactose operon repressor
2	nucleotidyltransferase domain-containing protein

## Sheet: Supp Table 10
Supplementary Table 10. Comparison of O. frankpressi endosymbiont with free living relatives
A: COGs of genes in the Osedax endosymbiont vs Free living relatives
			Osedax endosymbiont	GCA_018647765.1	GCA_018067325.1	GCA_016592555.1	GCA_016592435.1	GCA_014645375.1	GCA_003858655.1	GCA_003345655.1
COG broad functional domains	COG functional categories	COG codes	4.79	2.48	3.3	4.09	3.83	5.54	4.73	4.18	<- size in Mbp
Information Storage and Processing	Translation, ribosomal structure and biogenesis	J	216	155	204	209	206	206	216	206
	RNA processing and modification	A	0	0	0	0	1	1	0	0
	Transcription	K	319	169	230	274	234	348	300	286
	Replication, recombination and repair	L	222	103	118	128	121	210	127	116
	Chromatin structure and dynamics	B	3	1	0	1	1	1	1	2
Cellular Processes and Signaling	Cell cycle control, cell division, chromosome partitioning	D	57	32	38	51	40	48	44	37
	Defense mechanisms	V	39	19	32	39	39	63	41	31
	Signal transduction mechanisms	T	215	72	231	266	234	224	268	298
	Cell wall/membrane/envelope biogenesis	M	179	82	168	197	193	241	207	170
	Cell motility	N	108	46	66	105	85	80	99	115
	Cytoskeleton	Z	0	0	0	1	0	1	0	0
	Extracellular structures	W	1	0	0	0	0	1	1	0
	Intracellular trafficking, secretion, and vesicular support	U	97	31	91	86	83	105	107	100
	Posttranslational modification, protein turnover, chaperones	O	127	76	117	147	141	162	157	136
Metabolism	Energy production and conversion	C	194	199	232	256	253	366	331	277
	Carbohydrate transport and metabolism	G	137	106	108	131	123	236	156	150
	Amino acid transport and metabolis	E	408	300	305	360	286	387	356	332
	Nucleotide transport and metabolism	F	86	85	80	84	72	111	90	84
	Coenzyme transport and metabolism	H	171	143	135	156	136	168	186	161
	Lipid transport and metabolism	I	111	116	131	138	128	209	146	138
	Inorganic ion transport and metabolism	P	211	142	160	181	166	269	186	177
	Secondary metabolites biosynthesis, transport and catabolism	Q	83	70	101	107	92	152	109	83
Poorly characterized	Function unknown	S	795	311	617	705	669	830	725	579
B: showing the significantly enriched genes after normalization relative to the number of coding sequences in the Osedax endosymbiont vs Free living relatives
GO ID	Functional category	Count	p-value
GO:0009306	Protein secretion	2	0.0009844
GO:0015031	protein transport	4	2.18377 e-06
GO:1901135	carbohydrate derivative metabolic process	2	0.000242
GO:0032196	transposition	2	0.000361
GO:0043565	sequence-specific DNA binding	3	0.001163
GO:0009108	coenzyme biosynthetic process	3	0.00060121
GO:0006534	cysteine metabolic process	3	0.00060121
C: Presence of secretion systems and total numbers of secretion system genes in the Osedax endosymbiont vs Free living relatives
	number of genes in complete secretion systems	T5aSS	Flagellum	T5bSS	T1SS	T6SSi	T4P	Tad
Osedax endosymbiont	94	3	1	3	1	2	1	0
GCA_016592555.1	29	1	1	1	1	0	0	0
GCA_014645375.1	42	0	1	0	1	0	0	0
GCA_016592435.1	30	0	1	1	1	0	0	0
GCA_018067325.1	20	0	0	0	1	0	0	0
GCA_018647765.1	21	0	1	0	1	0	0	0
GCA_003345655.1	22	0	1	0	1	0	0	0
GCA_003858655.1	77	2	1	0	1	0	1	1

## Sheet: Supp Table 11
Supplementary Table 11. Comparison of O. frankpressi endosymbiont with the endosymbiont of Vestimentifera
A: showing enrichments of genes in the Osedax endosymbiont vs endosymbionts of other vestimentifera. Functional categories significantly enriched Osedax endosymbiont are highlighted in yellow.
			Osedax	Oasisia	Lamellibrachia	Paraescarpia	Riftia
COG broad functional domains	COG functional categories	COG codes	4.79	3.56	3.57	4.12	3.53	<- size in Mbp
Information Storage and Processing	Translation, ribosomal structure and biogenesis	J	216	186	186	181	185
	RNA processing and modification	A	0	2	1	1	2
	Transcription	K	319	134	124	144	132
	Replication, recombination and repair	L	222	137	555	156	137
	Chromatin structure and dynamics	B	3	0	1	1	0
Cellular Processes and Signaling	Cell cycle control, cell division, chromosome partitioning	D	57	52	50	54	54
	Defense mechanisms	V	39	41	36	41	45
	Signal transduction mechanisms	T	215	254	59	281	210
	Cell wall/membrane/envelope biogenesis	M	179	195	196	205	192
	Cell motility	N	108	123	99	117	129
	Cytoskeleton	Z	0	0	1	1	1
	Extracellular structures	W	1	0	0	0	0
	Intracellular trafficking, secretion, and vesicular support	U	97	129	109	124	81
	Posttranslational modification, protein turnover, chaperones	O	127	123	131	131	119
Metabolism	Energy production and conversion	C	194	316	280	309	332
	Carbohydrate transport and metabolism	G	137	90	85	86	86
	Amino acid transport and metabolis	E	408	133	130	129	138
	Nucleotide transport and metabolism	F	86	83	79	80	89
	Coenzyme transport and metabolism	H	171	152	137	139	144
	Lipid transport and metabolism	I	111	67	65	76	68
	Inorganic ion transport and metabolism	P	211	158	148	152	152
	Secondary metabolites biosynthesis, transport and catabolism	Q	83	57	46	55	40
Poorly characterized	Function unknown	S	795	680	610	673	712
B: showing the significantly enriched genes after normalization relative to the number of coding sequences in the Osedax endosymbiont vs endosymbionts of other vestimentifera
GO ID	Functional category	Count	p-value
GO:0043565	sequence-specific DNA binding	5	8.07459e-06
GO:0006865	amino acid transport	3	0.000800367
GO:0009058	biosynthetic process	3	0.000800367
GO:0071705	nitrogen compound transport	2	0.00198961
GO:1901135	carbohydrate derivative metabolic process	2	0.00198961
GO:0055085	transmembrane transport	6	0.00205549
GO:0015031	protein transport	4	0.00245228
C: Carbohydrate metabolism. 1 = pathway complete, 0 = pathway absent, T = pathway truncated
	Osedax	Oasisia	Lamellibrachia	Paraescarpia	Riftia
Glycolysis (Embden-Meyerhof pathway), glucose => pyruvate	1	1	1	1	1
Glycolysis, core module involving three-carbon compounds	1	1	1	1	1
Nucleotide sugar biosynthesis, glucose => UDP-glucose	1	1	1	1	1
UDP-N-acetyl-D-glucosamine biosynthesis, prokaryotes, glucose => UDP-GlcNAc	1	1	1	1	1
PRPP biosynthesis, ribose 5P => PRPP	1	1	1	1	1
Citrate cycle, first carbon oxidation, oxaloacetate => 2-oxoglutarate	1	1	1	1	1
Citrate cycle, second carbon oxidation, 2-oxoglutarate => oxaloacetate	1	1	T	1	1
Citrate cycle (TCA cycle, Krebs cycle)	1	1	T	1	1
Gluconeogenesis, oxaloacetate => fructose-6P	1	T	T	T	T
Pentose phosphate pathway, non-oxidative phase, fructose 6P => ribose 5P	1	T	T	T	T
Entner-Doudoroff pathway, glucose-6P => glyceraldehyde-3P + pyruvate	1	0	0	0	0
D-galactonate degradation, De Ley-Doudoroff pathway, D-galactonate => glycerate-3P	1	0	0	0	0
Pentose phosphate pathway (Pentose phosphate cycle)	T	T	T	T	T
Pentose phosphate pathway, oxidative phase, glucose 6P => ribulose 5P	T	1	1	1	1
Pyruvate oxidation, pyruvate => acetyl-CoA	T	1	1	1	1
Glycogen biosynthesis, glucose-1P => glycogen/starch	0	1	1	1	1
Glycogen degradation, glycogen => glucose-6P	0	1	T	T	1
Undecaprenylphosphate alpha-L-Ara4N biosynthesis, UDP-GlcA => undecaprenyl phosphate alpha-L-Ara4N	0	0	T	T	0
Semi-phosphorylative Entner-Doudoroff pathway, gluconate => glycerate-3P	T	0	0	0	0
Glyoxylate cycle	T	0	0	0	0
D: Amino acid biosynthesis pathways 1 = pathway complete, 0 = pathway absent
		hosts						symbionts
		osedax	oasisia	lamellibrachia	paraescarpia	riftia		osedax	oasisia	lamellibrachia	paraescarpia	riftia
non-essential	alanine	1	1	1	1	1		1	1	1	1	1
	cysteine	1	1	1	1	1		1	1	1	1	1
	aspartate	1	1	1	1	1		1	1	1	1	1
	glutamate	1	1	1	1	1		1	1	1	1	1
	glycine	1	1	1	1	1		1	1	1	1	1
	asparagine	1	1	1	1	1		0	1	1	1	1
	proline	0	1	1	1	1		1	1	1	1	1
	glutamine	1	1	1	1	1		1	1	1	1	1
	arginine	0	1	1	1	1		1	1	1	1	1
	serine	0	1	1	1	1		1	1	1	1	1
	tyrosine	1	1	1	1	1		T	T	T	T	T
essential	valine	0	0	0	0	0		1	1	1	1	1
	leucine	0	0	0	0	0		1	1	1	1	1
	isoleucine	1	1	1	0	1		1	1	1	1	1
	methionine	0	0	0	0	0		1	0	0	0	0
	phenylalanine	0	0	0	0	0		1	1	1	1	1
	threonine	0	0	0	0	0		1	T	T	T	T
	lysine	0	0	0	0	0		1	1	1	1	1
	histidine	0	0	0	0	0		1	1	1	1	1
	tryptophan	0	0	0	0	0		1	1	1	1	1
E: Vitamin biosynthesis pathways. 1 = pathway complete, 0 = pathway absent
	osedax	oasisia	lamellibrachia	paraescarpia	riftia
B1	1	1	1	1	1
B2	1	T	T	T	T
B3	1	1	1	1	1
B5	T	T	T	T	T
B6	1	0	0	0	0
B7	T	T	T	T	T
B9	1	1	1	1	1
B12 -A	1	0	0	0	0
B12-B	1	1	1	1	1
F: Lipid metabolism pathways
	osedax	oasisia	lamellibrachia	paraescarpia	riftia
Fatty acid biosynthesis, initiation	1	1	1	1	1
Fatty acid biosynthesis, elongation	1	1	1	1	1
beta-Oxidation, acyl-CoA synthesis	1	1	1	1	1
beta-Oxidation	1	1	0	1	1
Ketone body biosynthesis, acetyl-CoA => acetoacetate/3-hydroxybutyrate/acetone	T	0	0	0	0
Phosphatidylethanolamine (PE) biosynthesis, PA => PS => PE	1	1	1	1	1
G: Presence of secretion systems and total numbers of secretion system genes in the Osedax endosymbiont vs Free living relatives
	number of genes in complete secretion systems	T5aSS	Flagellum	T5bSS	T1SS	T6SSi	T4P	Tad	T2SS
Osedax endosymbiont	94	3	1	3	1	2	1	0	0
Oasisia endosymbiont	49	0	1	0	1	0	1	0	0
lamellibrachia endosymbiont	22	0	0	0	1	0	1	0	0
paraescarpia endosymbiont	76	0	1	1	0	1	1	0	1
riftia endosymbiont	54	0	1	0	0	0	1	0	1

## Sheet: Supp Table 12
Supplementary Table 12. Multiplatform annotation of the Osedax endosymbiont genome showing all coding sequences tagged with their respective COG category, common gene name, description of protein product, KEGG identifier, PFAM domain tag, and Gene Ontology identifier
query	COG_category	Preferred_name	Description	KEGG_ko	PFAMs	GOs
contig_1036_np1212_1280	BQ	-	COG0123 Deacetylases, including yeast histone deacetylase and acetoin utilization protein	-	Hist_deacetyl	-
contig_1036_np1212_1984	BQ	aphA	Histone deacetylase domain	-	Hist_deacetyl	-
contig_1036_np1212_4114	BQ	-	COG0123 Deacetylases, including yeast histone deacetylase and acetoin utilization protein	-	Hist_deacetyl	-
contig_1036_np1212_25	C	-	COG0543 2-polyprenylphenol hydroxylase and related flavodoxin oxidoreductases	ko:K00523	FAD_binding_6,FAD_binding_8,Fer2,NAD_binding_1	-
contig_1036_np1212_50	C	maeB	Malate dehydrogenase	ko:K00027,ko:K00029	Malic_M,malic	-
contig_1036_np1212_86	C	msrP	Part of the MsrPQ system that repairs oxidized periplasmic proteins containing methionine sulfoxide residues (Met-O), using respiratory chain electrons. Thus protects these proteins from oxidative-stress damage caused by reactive species of oxygen and chlorine generated by the host defense mechanisms. MsrPQ is essential for the maintenance of envelope integrity under bleach stress, rescuing a wid…	ko:K07147	Oxidored_molyb	-
contig_1036_np1212_87	C	msrQ	Part of the MsrPQ system that repairs oxidized periplasmic proteins containing methionine sulfoxide residues (Met-O), using respiratory chain electrons. Thus protects these proteins from oxidative-stress damage caused by reactive species of oxygen and chlorine generated by the host defense mechanisms. MsrPQ is essential for the maintenance of envelope integrity under bleach stress, rescuing a wid…	ko:K17247	Ferric_reduct	-
contig_1036_np1212_89	C	coxB	Subunits I and II form the functional core of the enzyme complex. Electrons originating in cytochrome c are transferred via heme a and Cu(A) to the binuclear center formed by heme a3 and Cu(B)	ko:K02275	COX2,COX2_TM,Cytochrome_CBB3	-
contig_1036_np1212_90	C	coxA	Cytochrome c oxidase is the component of the respiratory chain that catalyzes the reduction of oxygen to water. Subunits 1- 3 form the functional core of the enzyme complex. CO I is the catalytic subunit of the enzyme. Electrons originating in cytochrome c are transferred via the copper A center of subunit 2 and heme A of subunit 1 to the bimetallic center formed by heme A3 and copper B	ko:K02274,ko:K02298	COX1	-
contig_1036_np1212_92	C	coxC	Heme copper-type cytochrome quinol oxidase, subunit 3	ko:K02276	COX3	-
contig_1036_np1212_107	C	-	Belongs to the aconitase IPM isomerase family	ko:K01682	Aconitase,Aconitase_2_N,Aconitase_B_N	-
contig_1036_np1212_120	C	oadG	Lyase and sodium transporter	ko:K01573	OAD_gamma	GO:0003674,GO:0003824,GO:0006810,GO:0006811,GO:0006812,GO:0006814,GO:0008150,GO:0008948,GO:0015672,GO:0016829,GO:0016830,GO:0016831,GO:0030001,GO:0051179,GO:0051234
contig_1036_np1212_122	C	oadB	Na transporting methylmalonyl-CoA oxaloacetate decarboxylase beta subunit	ko:K01572	OAD_beta	GO:0003674,GO:0003824,GO:0005575,GO:0005623,GO:0005886,GO:0006091,GO:0006113,GO:0008150,GO:0008152,GO:0008948,GO:0009987,GO:0015980,GO:0016020,GO:0016829,GO:0016830,GO:0016831,GO:0044237,GO:0044464,GO:0055114,GO:0071944
contig_1036_np1212_255	C	-	The 2-oxoglutarate dehydrogenase complex catalyzes the overall conversion of 2-oxoglutarate to succinyl-CoA and CO(2)	ko:K00658	2-oxoacid_dh,Biotin_lipoyl,E3_binding	-
contig_1036_np1212_256	C	-	Dehydrogenase E1 component	ko:K11381	E1_dh,Transket_pyr,Transketolase_C	-
contig_1036_np1212_272	C	fdhD	Required for formate dehydrogenase (FDH) activity. Acts as a sulfur carrier protein that transfers sulfur from IscS to the molybdenum cofactor prior to its insertion into FDH	ko:K02379	FdhD-NarQ	-
contig_1036_np1212_273	C	fdsA	formate dehydrogenase	ko:K00123	Fer2_4,Fer4,Fer4_7,Molybdop_Fe4S4,Molybdopterin,Molydop_binding,NADH-G_4Fe-4S_3	-
contig_1036_np1212_274	C	fdsB	NADH-quinone oxidoreductase subunit F	ko:K00124	Complex1_51K,NADH_4Fe-4S,SLBB	-
contig_1036_np1212_275	C	-	Thioredoxin-like [2Fe-2S] ferredoxin	ko:K00127	2Fe-2S_thioredx	-
contig_1036_np1212_282	C	grxD	Belongs to the glutaredoxin family. Monothiol subfamily	ko:K07390	Glutaredoxin	GO:0003674,GO:0005488,GO:0005575,GO:0005622,GO:0005623,GO:0005737,GO:0005829,GO:0044424,GO:0044444,GO:0044464,GO:0048037,GO:0051536,GO:0051537,GO:0051540
contig_1036_np1212_293	C	fni	Involved in the biosynthesis of isoprenoids. Catalyzes the 1,3-allylic rearrangement of the homoallylic substrate isopentenyl (IPP) to its allylic isomer, dimethylallyl diphosphate (DMAPP)	-	FMN_dh	-
contig_1036_np1212_311	C	aceE	Component of the pyruvate dehydrogenase (PDH) complex, that catalyzes the overall conversion of pyruvate to acetyl-CoA and CO(2)	ko:K00163	Transketolase_N	-
contig_1036_np1212_312	C	aceF	The pyruvate dehydrogenase complex catalyzes the overall conversion of pyruvate to acetyl-CoA and CO(2)	ko:K00627	2-oxoacid_dh,Biotin_lipoyl,E3_binding	-
contig_1036_np1212_314	C	msrB	COG0229 Conserved domain frequently associated with peptide methionine sulfoxide reductase	ko:K07305	SelR	-
contig_1036_np1212_322	C	-	Prokaryotic cytochrome b561	-	Ni_hydr_CYTB	-
contig_1036_np1212_396	C	-	nitroreductase	-	Nitroreductase	-
contig_1036_np1212_406	C	-	Low-potential electron donor to a number of redox enzymes	ko:K03839,ko:K03840	Flavodoxin_1	-
contig_1036_np1212_413	C	-	Cytochrome b561	ko:K12262	Ni_hydr_CYTB	-
contig_1036_np1212_461	C	-	alcohol dehydrogenase	-	Fe-ADH	-
contig_1036_np1212_462	C	-	belongs to the aldehyde dehydrogenase family	-	Aldedh	-
contig_1036_np1212_550	C	nfuA	Involved in iron-sulfur cluster biogenesis. Binds a 4Fe- 4S cluster, can transfer this cluster to apoproteins, and thereby intervenes in the maturation of Fe S proteins. Could also act as a scaffold chaperone for damaged Fe S proteins	ko:K07400	Fe-S_biosyn,NifU	-
contig_1036_np1212_557	C	mqo	malate quinone oxidoreductase	ko:K00116	Mqo	-
contig_1036_np1212_585	C	fumA	Catalyzes the reversible hydration of fumarate to (S)- malate	ko:K01676	Fumerase,Fumerase_C	-
contig_1036_np1212_629	C	-	CsiD	ko:K15737	CsiD	-
contig_1036_np1212_643	C	aldA	belongs to the aldehyde dehydrogenase family	ko:K00128	Aldedh	-
contig_1036_np1212_650	C	dadA	PFAM FAD dependent oxidoreductase	ko:K21060	DAO	-
contig_1036_np1212_704	C	petA	Component of the ubiquinol-cytochrome c reductase complex (complex III or cytochrome b-c1 complex), which is a respiratory chain that generates an electrochemical potential coupled to ATP synthesis	ko:K00411	Rieske,UCR_Fe-S_N	-
contig_1036_np1212_705	C	petB	Component of the ubiquinol-cytochrome c reductase complex (complex III or cytochrome b-c1 complex), which is a respiratory chain that generates an electrochemical potential coupled to ATP synthesis	ko:K00412	Cytochrom_B_C,Cytochrome_B	-
contig_1036_np1212_706	C	petC	Cytochrome c1	ko:K00413	Cytochrom_C1	-
contig_1036_np1212_734	C	nqrA	NQR complex catalyzes the reduction of ubiquinone-1 to ubiquinol by two successive reactions, coupled with the transport of Na( ) ions from the cytoplasm to the periplasm. NqrA to NqrE are probably involved in the second step, the conversion of ubisemiquinone to ubiquinol	ko:K00346	NQRA,NQRA_SLBB	-
contig_1036_np1212_735	C	nqrB	NQR complex catalyzes the reduction of ubiquinone-1 to ubiquinol by two successive reactions, coupled with the transport of Na( ) ions from the cytoplasm to the periplasm. NqrA to NqrE are probably involved in the second step, the conversion of ubisemiquinone to ubiquinol	ko:K00347	NQR2_RnfD_RnfE	-
contig_1036_np1212_736	C	nqrC	NQR complex catalyzes the reduction of ubiquinone-1 to ubiquinol by two successive reactions, coupled with the transport of Na( ) ions from the cytoplasm to the periplasm. NqrA to NqrE are probably involved in the second step, the conversion of ubisemiquinone to ubiquinol	ko:K00348	FMN_bind	-
contig_1036_np1212_737	C	nqrD	NQR complex catalyzes the reduction of ubiquinone-1 to ubiquinol by two successive reactions, coupled with the transport of Na( ) ions from the cytoplasm to the periplasm. NqrA to NqrE are probably involved in the second step, the conversion of ubisemiquinone to ubiquinol	ko:K00349	Rnf-Nqr	GO:0003674,GO:0003824,GO:0003954,GO:0005575,GO:0005623,GO:0005886,GO:0006091,GO:0006119,GO:0006120,GO:0006139,GO:0006163,GO:0006725,GO:0006753,GO:0006793,GO:0006796,GO:0006807,GO:0006810,GO:0006811,GO:0006812,GO:0006814,GO:0008137,GO:0008150,GO:0008152,GO:0009117,GO:0009123,GO:0009126,GO:0009141,GO:0009144,GO:0009150,GO:0009161,GO:0009167,GO:0009199,GO:0009205,GO:0009259,GO:0009987,GO:0015672,GO:…
contig_1036_np1212_738	C	nqrE	NQR complex catalyzes the reduction of ubiquinone-1 to ubiquinol by two successive reactions, coupled with the transport of Na( ) ions from the cytoplasm to the periplasm. NqrA to NqrE are probably involved in the second step, the conversion of ubisemiquinone to ubiquinol	ko:K00350	Rnf-Nqr	-
contig_1036_np1212_739	C	nqrF	NQR complex catalyzes the reduction of ubiquinone-1 to ubiquinol by two successive reactions, coupled with the transport of Na( ) ions from the cytoplasm to the periplasm. The first step is catalyzed by NqrF, which accepts electrons from NADH and reduces ubiquinone-1 to ubisemiquinone by a one-electron transfer pathway	ko:K00351	FAD_binding_6,Fer2,NAD_binding_1	-
contig_1036_np1212_742	C	sthA	Conversion of NADPH, generated by peripheral catabolic pathways, to NADH, which can enter the respiratory chain for energy generation	ko:K00322	Pyr_redox_2,Pyr_redox_dim	-
contig_1036_np1212_753	C	yeaX	Pyridoxamine 5'-phosphate oxidase	ko:K07006,ko:K22343,ko:K22444	FAD_binding_6,Fer2,NAD_binding_1,Putative_PNPOx	-
contig_1036_np1212_778	C	paaE	oxidoreductase FAD NAD(P)-binding domain protein	ko:K02613,ko:K15983	FAD_binding_6,Fer2,NAD_binding_1	GO:0000166,GO:0003674,GO:0005488,GO:0006082,GO:0006725,GO:0006805,GO:0008150,GO:0008152,GO:0009056,GO:0009404,GO:0009407,GO:0009410,GO:0009636,GO:0009850,GO:0009852,GO:0009987,GO:0010124,GO:0010817,GO:0016054,GO:0019439,GO:0019748,GO:0019752,GO:0032787,GO:0036094,GO:0042178,GO:0042221,GO:0042445,GO:0042447,GO:0042537,GO:0043167,GO:0043168,GO:0043436,GO:0044237,GO:0044248,GO:0044281,GO:0044282,GO:…
contig_1036_np1212_801	C	leuB	Catalyzes the oxidation of 3-carboxy-2-hydroxy-4- methylpentanoate (3-isopropylmalate) to 3-carboxy-4-methyl-2- oxopentanoate. The product decarboxylates to 4-methyl-2 oxopentanoate	ko:K00052	Iso_dh	GO:0000287,GO:0003674,GO:0003824,GO:0003862,GO:0005488,GO:0005575,GO:0005622,GO:0005623,GO:0005737,GO:0005829,GO:0006082,GO:0006520,GO:0006551,GO:0006807,GO:0006950,GO:0007154,GO:0008150,GO:0008152,GO:0008652,GO:0009058,GO:0009081,GO:0009082,GO:0009098,GO:0009267,GO:0009605,GO:0009987,GO:0009991,GO:0016053,GO:0016491,GO:0016614,GO:0016616,GO:0019752,GO:0030145,GO:0031667,GO:0031668,GO:0031669,GO:…
contig_1036_np1212_812	C	acnB	Belongs to the aconitase IPM isomerase family	ko:K01682	Aconitase,Aconitase_2_N,Aconitase_B_N	-
contig_1036_np1212_845	C	-	Domain of unknown function (DUF4445)	-	DUF4445,Fer2	-
contig_1036_np1212_882	C	-	glycerophosphoryl diester phosphodiesterase	ko:K01126	GDPD	-
contig_1036_np1212_1020	C	bbsF_2	acyl-CoA transferases carnitine dehydratase	ko:K07749	CoA_transf_3	-
contig_1036_np1212_1029	C	dld	Dehydrogenase	ko:K00004,ko:K00102	FAD-oxidase_C,FAD_binding_4	GO:0003674,GO:0003824,GO:0004457,GO:0005575,GO:0005622,GO:0005623,GO:0005737,GO:0005739,GO:0005740,GO:0005743,GO:0006139,GO:0006163,GO:0006164,GO:0006725,GO:0006753,GO:0006754,GO:0006793,GO:0006796,GO:0006807,GO:0008150,GO:0008152,GO:0008720,GO:0009058,GO:0009117,GO:0009123,GO:0009124,GO:0009126,GO:0009127,GO:0009141,GO:0009142,GO:0009144,GO:0009145,GO:0009150,GO:0009152,GO:0009156,GO:0009161,GO:…
contig_1036_np1212_1059	C	-	belongs to the CobB CobQ family	ko:K00625	PTA_PTB	-
contig_1036_np1212_1125	C	-	Dihydrolipoamide acetyltransferase component of pyruvate dehydrogenase complex	ko:K09699	2-oxoacid_dh,Biotin_lipoyl,E3_binding	-
contig_1036_np1212_1126	C	bkdA2	Pyruvate 2-oxoglutarate dehydrogenase complex, dehydrogenase (E1) component, eukaryotic type, beta subunit	ko:K00167	Transket_pyr,Transketolase_C	-
contig_1036_np1212_1127	C	bkdA1	Pyruvate 2-oxoglutarate dehydrogenase complex, dehydrogenase (E1) component, eukaryotic type, alpha subunit	ko:K00166	E1_dh	-
contig_1036_np1212_1128	C	ldh	Glu Leu Phe Val dehydrogenase dimerisation region	ko:K00263	ELFV_dehydrog,ELFV_dehydrog_N	-
contig_1036_np1212_1157	C	alh	Belongs to the aldehyde dehydrogenase family	ko:K00128	Aldedh	GO:0003674,GO:0003824,GO:0004029,GO:0006081,GO:0008150,GO:0008152,GO:0009987,GO:0016491,GO:0016620,GO:0016903,GO:0044237,GO:0055114,GO:0071704
contig_1036_np1212_1215	C	-	Cytochrome C oxidase, cbb3-type, subunit III	-	Cytochrome_CBB3	-
contig_1036_np1212_1235	C	mmsA	COG1012 NAD-dependent aldehyde dehydrogenases	ko:K00140	Aldedh	-
contig_1036_np1212_1236	C	mmsA	methylmalonate-semialdehyde dehydrogenase	ko:K00140	Aldedh	-
contig_1036_np1212_1312	C	feaB	Aldehyde dehydrogenase family	ko:K00128	Aldedh	-
contig_1036_np1212_1405	C	-	Di-haem cytochrome c peroxidase	-	CCP_MauG,Cytochrom_C	-
contig_1036_np1212_1441	C	bluB	coenzyme F420-1:gamma-L-glutamate ligase activity	ko:K00768,ko:K04719	DBI_PRT,Nitroreductase	GO:0003674,GO:0003824,GO:0006725,GO:0006766,GO:0006767,GO:0006807,GO:0008150,GO:0008152,GO:0009058,GO:0009110,GO:0009235,GO:0009236,GO:0009987,GO:0016491,GO:0016705,GO:0017144,GO:0018130,GO:0019438,GO:0033013,GO:0033014,GO:0034641,GO:0042364,GO:0044237,GO:0044249,GO:0044271,GO:0044281,GO:0044283,GO:0046483,GO:0051186,GO:0051188,GO:0055114,GO:0071704,GO:1901360,GO:1901362,GO:1901564,GO:1901566,GO:…
contig_1036_np1212_1445	C	etf	Electron transfer flavoprotein-ubiquinone oxidoreductase	ko:K00311	ETF_QO,FAD_binding_2,NAD_binding_8	-
contig_1036_np1212_1452	C	-	belongs to the aldehyde dehydrogenase family	ko:K00135	Aldedh	-
contig_1036_np1212_1454	C	-	Flavodoxin reductases (Ferredoxin-NADPH reductases) family 1	ko:K00523	FAD_binding_6,FHA,Fer2,MOSC,MOSC_N,NAD_binding_1	-
contig_1036_np1212_1466	C	aceE	Component of the pyruvate dehydrogenase (PDH) complex, that catalyzes the overall conversion of pyruvate to acetyl-CoA and CO(2)	ko:K00163	Transketolase_N	-
contig_1036_np1212_1471	C	nfsA	COG0778 Nitroreductase	ko:K10678,ko:K19285	Nitroreductase	GO:0000166,GO:0003674,GO:0003824,GO:0005488,GO:0005575,GO:0005622,GO:0005623,GO:0005737,GO:0005829,GO:0008150,GO:0008152,GO:0010181,GO:0016491,GO:0016651,GO:0016657,GO:0032553,GO:0034567,GO:0036094,GO:0043167,GO:0043168,GO:0044424,GO:0044444,GO:0044464,GO:0048037,GO:0050662,GO:0055114,GO:0097159,GO:0097367,GO:1901265,GO:1901363
contig_1036_np1212_1478	C	acnD	Catalyzes the isomerization of citrate to isocitrate via cis-aconitate	ko:K01681,ko:K20455	Aconitase,Aconitase_C	GO:0003674,GO:0003824,GO:0003994,GO:0006082,GO:0006091,GO:0006099,GO:0006101,GO:0006629,GO:0006631,GO:0008150,GO:0008152,GO:0009056,GO:0009060,GO:0009062,GO:0009987,GO:0015980,GO:0016042,GO:0016054,GO:0016829,GO:0016835,GO:0016836,GO:0016999,GO:0017001,GO:0017144,GO:0019541,GO:0019543,GO:0019626,GO:0019629,GO:0019752,GO:0032787,GO:0042737,GO:0043436,GO:0044237,GO:0044238,GO:0044242,GO:0044248,GO:…
contig_1036_np1212_1479	C	prpC	Belongs to the citrate synthase family	ko:K01659	Citrate_synt	GO:0003674,GO:0003824,GO:0004108,GO:0006082,GO:0006091,GO:0006113,GO:0006629,GO:0006631,GO:0008150,GO:0008152,GO:0009987,GO:0015980,GO:0016740,GO:0016746,GO:0016829,GO:0016830,GO:0016833,GO:0016999,GO:0017144,GO:0019541,GO:0019679,GO:0019752,GO:0032787,GO:0036440,GO:0043436,GO:0044237,GO:0044238,GO:0044255,GO:0044281,GO:0046459,GO:0046912,GO:0050440,GO:0055114,GO:0071704
contig_1036_np1212_1480	C	prpC	Belongs to the citrate synthase family	ko:K01659	Citrate_synt	-
contig_1036_np1212_1536	C	-	Isocitrate dehydrogenase	ko:K00031	IDH	-
contig_1036_np1212_1563	C	aceA	Isocitrate lyase	ko:K01637	ICL	-
contig_1036_np1212_1631	C	trxB	Belongs to the class-II pyridine nucleotide-disulfide oxidoreductase family	ko:K00384	Pyr_redox_2	-
contig_1036_np1212_1651	C	-	Transketolase, pyrimidine binding domain	ko:K11381	E1_dh,Transket_pyr,Transketolase_C	-
contig_1036_np1212_1667	C	gor	Belongs to the class-I pyridine nucleotide-disulfide oxidoreductase family	ko:K00383	Pyr_redox_2,Pyr_redox_dim	-
contig_1036_np1212_1722	C	-	Electron transfer flavoprotein	ko:K03522	ETF,ETF_alpha	-
contig_1036_np1212_1723	C	-	Electron transfer flavoprotein	ko:K03521	ETF	-
contig_1036_np1212_1780	C	ndh	PFAM FAD-dependent pyridine nucleotide-disulphide oxidoreductase	ko:K03885	Pyr_redox_2	-
contig_1036_np1212_1891	C	glpD	Belongs to the FAD-dependent glycerol-3-phosphate dehydrogenase family	ko:K00111	DAO,DAO_C	GO:0000166,GO:0003674,GO:0003824,GO:0004368,GO:0005488,GO:0005575,GO:0005622,GO:0005623,GO:0005737,GO:0005886,GO:0005887,GO:0006072,GO:0006091,GO:0006793,GO:0006796,GO:0008150,GO:0008152,GO:0009055,GO:0009056,GO:0009331,GO:0009987,GO:0016020,GO:0016021,GO:0016491,GO:0016614,GO:0016901,GO:0019637,GO:0022900,GO:0031224,GO:0031226,GO:0032991,GO:0036094,GO:0043167,GO:0043168,GO:0044237,GO:0044424,GO:…
contig_1036_np1212_1906	C	-	Belongs to the prokaryotic molybdopterin-containing oxidoreductase family	-	Molybdopterin,Molydop_binding	-
contig_1036_np1212_1967	C	-	Belongs to the class-I pyridine nucleotide-disulfide oxidoreductase family	-	Pyr_redox_2,Pyr_redox_dim,SNARE_assoc	-
contig_1036_np1212_2031	C	sucD	Succinyl-CoA synthetase functions in the citric acid cycle (TCA), coupling the hydrolysis of succinyl-CoA to the synthesis of either ATP or GTP and thus represents the only step of substrate-level phosphorylation in the TCA. The alpha subunit of the enzyme binds the substrates coenzyme A and phosphate, while succinate binding and nucleotide specificity is provided by the beta subunit	ko:K01902	CoA_binding,Ligase_CoA	-
contig_1036_np1212_2032	C	sucC	Succinyl-CoA synthetase functions in the citric acid cycle (TCA), coupling the hydrolysis of succinyl-CoA to the synthesis of either ATP or GTP and thus represents the only step of substrate-level phosphorylation in the TCA. The beta subunit provides nucleotide specificity of the enzyme and binds the substrate succinate, while the binding sites for coenzyme A and phosphate are found in the alpha …	ko:K01903	ATP-grasp_2,Ligase_CoA	-
contig_1036_np1212_2033	C	lpdG	2-oxoglutarate dehydrogenase complex	ko:K00382	Pyr_redox_2,Pyr_redox_dim	-
contig_1036_np1212_2034	C	sucB	The 2-oxoglutarate dehydrogenase complex catalyzes the overall conversion of 2-oxoglutarate to succinyl-CoA and CO(2)	ko:K00658	2-oxoacid_dh,Biotin_lipoyl,E3_binding	-
contig_1036_np1212_2035	C	sucA	COG0567 2-oxoglutarate dehydrogenase complex, dehydrogenase (E1) component, and related enzymes	ko:K00164	2-oxogl_dehyd_N,E1_dh,OxoGdeHyase_C,Transket_pyr	GO:0003674,GO:0003824,GO:0004591,GO:0005575,GO:0005622,GO:0005623,GO:0005737,GO:0005829,GO:0006082,GO:0006091,GO:0006099,GO:0006101,GO:0008150,GO:0008152,GO:0009060,GO:0009987,GO:0015980,GO:0016491,GO:0016624,GO:0016903,GO:0016999,GO:0017144,GO:0019752,GO:0032991,GO:0043436,GO:0044237,GO:0044238,GO:0044281,GO:0044424,GO:0044444,GO:0044464,GO:0045239,GO:0045240,GO:0045252,GO:0045333,GO:0055114,GO:…
contig_1036_np1212_2036	C	sdhB	SdhA B are the catalytic subcomplex and can exhibit succinate dehydrogenase activity in the absence of SdhC D which are the membrane components and form cytochrome b556	ko:K00240	Fer2_3,Fer4_17	-
contig_1036_np1212_2037	C	sdhA	Belongs to the FAD-dependent oxidoreductase 2 family. FRD SDH subfamily	ko:K00239	FAD_binding_2,Succ_DH_flav_C	GO:0000104,GO:0000166,GO:0003674,GO:0003824,GO:0005488,GO:0005575,GO:0005622,GO:0005623,GO:0005886,GO:0006082,GO:0006091,GO:0006099,GO:0006101,GO:0008150,GO:0008152,GO:0009055,GO:0009060,GO:0009061,GO:0009987,GO:0015980,GO:0016020,GO:0016491,GO:0016627,GO:0016999,GO:0017144,GO:0019752,GO:0022900,GO:0032991,GO:0036094,GO:0043167,GO:0043168,GO:0043436,GO:0044237,GO:0044238,GO:0044281,GO:0044424,GO:…
contig_1036_np1212_2038	C	sdhD	Membrane-anchoring subunit of succinate dehydrogenase (SDH)	ko:K00242	Sdh_cyt	-
contig_1036_np1212_2039	C	sdhC	succinate dehydrogenase	ko:K00241	Sdh_cyt	-
contig_1036_np1212_2040	C	gltA	Belongs to the citrate synthase family	ko:K01647	Citrate_synt	-
contig_1036_np1212_2045	C	ccoG	IG-like fold at C-terminal of FixG, putative oxidoreductase	-	Fer4_18,Fer4_5,FixG_C	-
contig_1036_np1212_2146	C	cysI	Sulfite reductase	ko:K00381	NIR_SIR,NIR_SIR_ferr	-
contig_1036_np1212_2150	C	rnfA	Part of a membrane complex involved in electron transport	ko:K03617	Rnf-Nqr	-
contig_1036_np1212_2151	C	rnfB	Part of a membrane complex involved in electron transport	ko:K03616	FeS,Fer4_21	-
contig_1036_np1212_2152	C	rnfC	Part of a membrane complex involved in electron transport	ko:K03615	Complex1_51K,Fer4_10,Fer4_7,Fer4_8,RnfC_N,SLBB	-
contig_1036_np1212_2153	C	rnfD	Part of a membrane complex involved in electron transport	ko:K03614	NQR2_RnfD_RnfE	-
contig_1036_np1212_2154	C	rnfG	Part of a membrane complex involved in electron transport	ko:K03612	FMN_bind	-
contig_1036_np1212_2155	C	rnfE	Part of a membrane complex involved in electron transport	ko:K03613	Rnf-Nqr	-
contig_1036_np1212_2158	C	yfaE	COG0633 Ferredoxin	ko:K11107	Fer2	GO:0003674,GO:0003824,GO:0005488,GO:0005575,GO:0005622,GO:0005623,GO:0005737,GO:0006091,GO:0006124,GO:0006464,GO:0006807,GO:0008150,GO:0008152,GO:0009055,GO:0009987,GO:0016491,GO:0019538,GO:0022900,GO:0030091,GO:0036211,GO:0043170,GO:0043412,GO:0044237,GO:0044238,GO:0044260,GO:0044267,GO:0044424,GO:0044464,GO:0048037,GO:0051536,GO:0051537,GO:0051540,GO:0055114,GO:0071704,GO:1901564
contig_1036_np1212_2194	C	btuE	Glutathione peroxidase	ko:K00432	GSHPx	-
contig_1036_np1212_2238	C	-	Belongs to the iron ascorbate-dependent oxidoreductase family	-	2OG-FeII_Oxy,DIOX_N	-
contig_1036_np1212_2272	C	-	Periplasmic nitrate reductase protein NapE	-	NapE	-
contig_1036_np1212_2273	C	napF	COG1145 Ferredoxin	ko:K02572	Fer4,Fer4_4,Fer4_7,Fer4_9	-
contig_1036_np1212_2275	C	napA	nitrate reductase (NAP). Only expressed at high levels during aerobic growth. NapAB complex receives electrons from the membrane-anchored tetraheme protein NapC	ko:K02567	Molybdop_Fe4S4,Molybdopterin,Molydop_binding,TAT_signal	-
contig_1036_np1212_2276	C	napB	Electron transfer subunit of the periplasmic nitrate reductase complex NapAB	ko:K02568	NapB	-
contig_1036_np1212_2277	C	napC	TIGRFAM periplasmic nitrate (or nitrite) reductase c-type cytochrome, NapC NirT family	ko:K02569	Cytochrom_NNT	-
contig_1036_np1212_2290	C	adhC	Belongs to the zinc-containing alcohol dehydrogenase family. Class-III subfamily	ko:K00121	ADH_N,ADH_zinc_N	-
contig_1036_np1212_2360	C	ppa	Catalyzes the hydrolysis of inorganic pyrophosphate (PPi) forming two phosphate ions	ko:K01507	Pyrophosphatase	-
contig_1036_np1212_2412	C	astD	Catalyzes the NAD-dependent reduction of succinylglutamate semialdehyde into succinylglutamate	ko:K06447	Aldedh	-
contig_1036_np1212_2427	C	-	UPF0313 protein	-	DUF3362,Radical_SAM,Radical_SAM_N	-
contig_1036_np1212_2448	C	ccoN	Belongs to the heme-copper respiratory oxidase family	ko:K00404	COX1	GO:0003674,GO:0003824,GO:0004129,GO:0005215,GO:0005488,GO:0005506,GO:0005507,GO:0005575,GO:0005623,GO:0005886,GO:0005887,GO:0006091,GO:0006119,GO:0006139,GO:0006163,GO:0006725,GO:0006753,GO:0006793,GO:0006796,GO:0006807,GO:0006810,GO:0006811,GO:0006812,GO:0008144,GO:0008150,GO:0008152,GO:0008324,GO:0009055,GO:0009060,GO:0009117,GO:0009123,GO:0009126,GO:0009141,GO:0009144,GO:0009150,GO:0009161,GO:…
contig_1036_np1212_2449	C	ccoO	COG2993 Cbb3-type cytochrome oxidase, cytochrome c subunit	ko:K00405	FixO	-
contig_1036_np1212_2450	C	ccoP	C-type cytochrome. Part of the cbb3-type cytochrome c oxidase complex	ko:K00406	Cytochrome_CBB3,FixP_N	-
contig_1036_np1212_2451	C	ccoG	COG0348 Polyferredoxin	-	Fer4_18,Fer4_5,FixG_C	-
contig_1036_np1212_2459	C	-	NosL	ko:K19342	NosL	-
contig_1036_np1212_2464	C	nosZ	Nitrous-oxide reductase is part of a bacterial respiratory system which is activated under anaerobic conditions in the presence of nitrate or nitrous oxide	ko:K00376	-	-
contig_1036_np1212_2470	C	-	Aldehyde dehydrogenase family	ko:K00135	Aldedh	-
contig_1036_np1212_2508	C	queG	Catalyzes the conversion of epoxyqueuosine (oQ) to queuosine (Q), which is a hypermodified base found in the wobble positions of tRNA(Asp), tRNA(Asn), tRNA(His) and tRNA(Tyr)	ko:K18979	DUF1730,Fer4_16	-
contig_1036_np1212_2577	C	ugd	Belongs to the UDP-glucose GDP-mannose dehydrogenase family	ko:K00012	UDPG_MGDP_dh,UDPG_MGDP_dh_C,UDPG_MGDP_dh_N	-
contig_1036_np1212_2595	C	-	Ferredoxin	ko:K21832	FAD_binding_6,Fer2,NAD_binding_1	-
contig_1036_np1212_2605	C	betB	Involved in the biosynthesis of the osmoprotectant glycine betaine. Catalyzes the reversible oxidation of betaine aldehyde to the corresponding acid	ko:K00130	Aldedh	-
contig_1036_np1212_2658	C	erpA	iron-sulfur cluster insertion protein erpA	ko:K15724	Fe-S_biosyn	-
contig_1036_np1212_2786	C	sdhC	succinate dehydrogenase	ko:K00241	Sdh_cyt	GO:0000104,GO:0003674,GO:0003824,GO:0005488,GO:0005575,GO:0005623,GO:0005886,GO:0006091,GO:0008150,GO:0008152,GO:0008177,GO:0009055,GO:0009060,GO:0009987,GO:0015980,GO:0016020,GO:0016043,GO:0016491,GO:0016627,GO:0016635,GO:0017004,GO:0020037,GO:0022607,GO:0022900,GO:0034622,GO:0043933,GO:0044085,GO:0044237,GO:0044464,GO:0045333,GO:0046906,GO:0048037,GO:0048038,GO:0048039,GO:0055114,GO:0065003,GO:…
contig_1036_np1212_2787	C	-	Succinate dehydrogenase hydrophobic	ko:K00242	-	-
contig_1036_np1212_2789	C	-	pseudoazurin	-	Copper-bind	GO:0005575,GO:0005623,GO:0042597,GO:0044464
contig_1036_np1212_2837	C	glcF	Glycolate oxidase iron-sulfur subunit	ko:K11473	CCG,Fer4_7,Fer4_8	-
contig_1036_np1212_2838	C	glcE	Glycolate oxidase	ko:K11472	FAD-oxidase_C,FAD_binding_4	-
contig_1036_np1212_2839	C	-	FAD linked oxidases, C-terminal domain	ko:K00104	FAD-oxidase_C,FAD_binding_4	-
contig_1036_np1212_2917	C	qor	Zinc-binding dehydrogenase	ko:K00344	ADH_N,ADH_zinc_N	-
contig_1036_np1212_2961	C	-	Cytochrome C and Quinol oxidase polypeptide I	ko:K04561	COX1	-
contig_1036_np1212_3028	C	epmB	lysine 2,3-aminomutase	ko:K19810	Fer4_12,Fer4_14,Radical_SAM	-
contig_1036_np1212_3158	C	-	PFAM Copper binding proteins, plastocyanin azurin family	-	Copper-bind	-
contig_1036_np1212_3189	C	-	alcohol dehydrogenase	-	Fe-ADH	-
contig_1036_np1212_3206	C	-	Luciferase-like monooxygenase	-	Bac_luciferase	-
contig_1036_np1212_3208	C	-	Belongs to the zinc-containing alcohol dehydrogenase family. Quinone oxidoreductase subfamily	-	ADH_N,ADH_zinc_N_2	-
contig_1036_np1212_3222	C	-	Aldo keto reductase	-	Aldo_ket_red	-
contig_1036_np1212_3252	C	glcB	Involved in the glycolate utilization. Catalyzes the condensation and subsequent hydrolysis of acetyl-coenzyme A (acetyl-CoA) and glyoxylate to form malate and CoA	ko:K01638	Malate_synthase	-
contig_1036_np1212_3299	C	-	2Fe-2S iron-sulfur cluster binding domain	-	Fer2_4	-
contig_1036_np1212_3300	C	-	BFD-like [2Fe-2S] binding domain	-	Fer2_BFD,Pyr_redox_2	-
contig_1036_np1212_3304	C	-	Pyruvate ferredoxin/flavodoxin oxidoreductase	ko:K04090	POR,TPP_enzyme_C	-
contig_1036_np1212_3305	C	-	CoA-transferase family III	ko:K07749	CoA_transf_3	-
contig_1036_np1212_3354	C	-	Di-haem oxidoreductase, putative peroxidase	-	DHOR	-
contig_1036_np1212_3358	C	-	Ferredoxin	-	Fer4	-
contig_1036_np1212_3395	C	-	Belongs to the iron ascorbate-dependent oxidoreductase family	-	2OG-FeII_Oxy,DIOX_N	-
contig_1036_np1212_3409	C	-	ATP synthase I chain	-	ATP-synt_I	-
contig_1036_np1212_3410	C	atpB	it plays a direct role in the translocation of protons across the membrane	ko:K02108	ATP-synt_A	-
contig_1036_np1212_3411	C	atpE	F(1)F(0) ATP synthase produces ATP from ADP in the presence of a proton or sodium gradient. F-type ATPases consist of two structural domains, F(1) containing the extramembraneous catalytic core and F(0) containing the membrane proton channel, linked together by a central stalk and a peripheral stalk. During catalysis, ATP synthesis in the catalytic domain of F(1) is coupled via a rotary mechanism…	ko:K02110	ATP-synt_C	-
contig_1036_np1212_3412	C	atpF	Component of the F(0) channel, it forms part of the peripheral stalk, linking F(1) to F(0)	ko:K02109	ATP-synt_B	GO:0003674,GO:0003824,GO:0005215,GO:0005575,GO:0005622,GO:0005623,GO:0005886,GO:0006139,GO:0006163,GO:0006164,GO:0006725,GO:0006753,GO:0006754,GO:0006793,GO:0006796,GO:0006807,GO:0006810,GO:0006811,GO:0006812,GO:0008150,GO:0008152,GO:0008324,GO:0009058,GO:0009117,GO:0009123,GO:0009124,GO:0009126,GO:0009127,GO:0009141,GO:0009142,GO:0009144,GO:0009145,GO:0009150,GO:0009152,GO:0009156,GO:0009161,GO:…
contig_1036_np1212_3413	C	atpH	F(1)F(0) ATP synthase produces ATP from ADP in the presence of a proton or sodium gradient. F-type ATPases consist of two structural domains, F(1) containing the extramembraneous catalytic core and F(0) containing the membrane proton channel, linked together by a central stalk and a peripheral stalk. During catalysis, ATP synthesis in the catalytic domain of F(1) is coupled via a rotary mechanism…	ko:K02113	OSCP	-
contig_1036_np1212_3414	C	atpA	Produces ATP from ADP in the presence of a proton gradient across the membrane. The alpha chain is a regulatory subunit	ko:K02111	ATP-synt_ab,ATP-synt_ab_C,ATP-synt_ab_N	-
contig_1036_np1212_3415	C	atpG	Produces ATP from ADP in the presence of a proton gradient across the membrane. The gamma chain is believed to be important in regulating ATPase activity and the flow of protons through the CF(0) complex	ko:K02115	ATP-synt	-
contig_1036_np1212_3416	C	atpD	Produces ATP from ADP in the presence of a proton gradient across the membrane. The catalytic sites are hosted primarily by the beta subunits	ko:K02112	ATP-synt_ab,ATP-synt_ab_N	-
contig_1036_np1212_3417	C	atpC	Produces ATP from ADP in the presence of a proton gradient across the membrane	ko:K02114	ATP-synt_DE,ATP-synt_DE_N	-
contig_1036_np1212_3457	C	-	NAD-binding of NADP-dependent 3-hydroxyisobutyrate dehydrogenase	ko:K08319	NAD_binding_11,NAD_binding_2	-
contig_1036_np1212_3539	C	cc4	COG2863 Cytochrome c553	-	Cytochrom_C,Cytochrome_CBB3	-
contig_1036_np1212_3564	C	-	Belongs to the prokaryotic molybdopterin-containing oxidoreductase family	-	Molybdop_Fe4S4,Molybdopterin,Molydop_binding	-
contig_1036_np1212_3568	C	ackA	Catalyzes the formation of acetyl phosphate from acetate and ATP. Can also catalyze the reverse reaction	ko:K00925	Acetate_kinase	-
contig_1036_np1212_3586	C	azoR	Catalyzes the reductive cleavage of azo bond in aromatic azo compounds to the corresponding amines. Requires NADH, but not NADPH, as an electron donor for its activity	ko:K01118	Flavodoxin_2	GO:0000166,GO:0003674,GO:0003824,GO:0005488,GO:0005575,GO:0005622,GO:0005623,GO:0005737,GO:0005829,GO:0006732,GO:0006950,GO:0006979,GO:0008081,GO:0008150,GO:0008152,GO:0008770,GO:0009058,GO:0009108,GO:0009987,GO:0010181,GO:0016491,GO:0016651,GO:0016655,GO:0016661,GO:0016787,GO:0016788,GO:0032553,GO:0036094,GO:0042578,GO:0043167,GO:0043168,GO:0044237,GO:0044249,GO:0044424,GO:0044444,GO:0044464,GO:…
contig_1036_np1212_3682	C	-	Aldehyde dehydrogenase family	ko:K00140	Aldedh	-
contig_1036_np1212_3715	C	-	Di-haem oxidoreductase, putative peroxidase	-	DHOR	-
contig_1036_np1212_3750	C	-	Belongs to the aldehyde dehydrogenase family	ko:K09472	Aldedh	-
contig_1036_np1212_3784	C	-	cytochrome c5	-	Cytochrome_CBB3	-
contig_1036_np1212_3800	C	-	Belongs to the LDH2 MDH2 oxidoreductase family	ko:K13609	Ldh_2	-
contig_1036_np1212_3837	C	lldD	Catalyzes the conversion of L-lactate to pyruvate. Is coupled to the respiratory chain	ko:K00101	FMN_dh	-
contig_1036_np1212_3911	C	aldH	Dehydrogenase	ko:K13877	Aldedh	-
contig_1036_np1212_3923	C	fumC	Involved in the TCA cycle. Catalyzes the stereospecific interconversion of fumarate to L-malate	ko:K01679	FumaraseC_C,Lyase_1	-
contig_1036_np1212_4002	C	fdxA	Ferredoxins are iron-sulfur proteins that transfer electrons in a wide variety of metabolic reactions	ko:K05524	DUF3470,Fer4,Fer4_9	-
contig_1036_np1212_4030	C	-	methylmalonate-semialdehyde dehydrogenase	ko:K00140	Aldedh	-
contig_1036_np1212_4062	C	aldB	belongs to the aldehyde dehydrogenase family	ko:K00138	Aldedh	-
contig_1036_np1212_4090	C	tdh	Catalyzes the NAD( )-dependent oxidation of L-threonine to 2-amino-3-ketobutyrate	ko:K00060	ADH_N,ADH_zinc_N	-
contig_1036_np1212_4096	C	tas	oxidoreductases (related to aryl-alcohol dehydrogenases)	-	Aldo_ket_red	GO:0003674,GO:0003824,GO:0004033,GO:0005575,GO:0005622,GO:0005623,GO:0005737,GO:0005829,GO:0006950,GO:0007154,GO:0008150,GO:0008152,GO:0009267,GO:0009605,GO:0009987,GO:0009991,GO:0016491,GO:0016614,GO:0016616,GO:0031667,GO:0031668,GO:0031669,GO:0033554,GO:0034198,GO:0042594,GO:0044424,GO:0044444,GO:0044464,GO:0050896,GO:0051716,GO:0055114,GO:0071496,GO:1990928
contig_1036_np1212_4127	C	-	D-lactate dehydrogenase, membrane binding	ko:K03777	FAD_binding_4,Lact-deh-memb	-
contig_1036_np1212_783	CE	-	Belongs to the selenophosphate synthase 1 family. Class I subfamily	ko:K01008	AIRS,AIRS_C,Pyr_redox_2	-
contig_1036_np1212_3502	CE	putA	Oxidizes proline to glutamate for use as a carbon and nitrogen source	ko:K13821	Aldedh,Pro_dh,Pro_dh-DNA_bdg	-
contig_1036_np1212_916	CEH	-	D-isomer specific 2-hydroxyacid dehydrogenase NAD-binding	-	2-Hacid_dh_C	-
contig_1036_np1212_1050	CH	-	D-isomer specific 2-hydroxyacid dehydrogenase, catalytic domain	ko:K00058,ko:K04496	2-Hacid_dh,2-Hacid_dh_C	-
contig_1036_np1212_1075	CH	-	2-polyprenyl-6-methoxyphenol hydroxylase and related FAD-dependent	ko:K03184	FAD_binding_3	-
contig_1036_np1212_1101	CH	-	FAD binding domain	-	FAD_binding_3	-
contig_1036_np1212_1110	CH	-	COG0654 2-polyprenyl-6-methoxyphenol hydroxylase and related FAD-dependent oxidoreductases	-	FAD_binding_3	-
contig_1036_np1212_1346	CH	fpr	Flavodoxin reductases (Ferredoxin-NADPH reductases) family 1	ko:K00528	FAD_binding_6,NAD_binding_1	-
contig_1036_np1212_1656	CH	-	FAD binding domain	-	FAD_binding_3	-
contig_1036_np1212_1993	CH	-	Catalyzes the conversion of salicylyl-CoA to gentisyl-CoA	ko:K09461	FAD_binding_3,Oxidored_FMN	-
contig_1036_np1212_4085	CH	ubiH	COG0654 2-polyprenyl-6-methoxyphenol hydroxylase and related FAD-dependent oxidoreductases	ko:K03185	FAD_binding_3	-
contig_1036_np1212_4086	CH	ubiF	hydroxylase	ko:K18800	FAD_binding_3	-
contig_1036_np1212_121	CI	oadA	Oxaloacetate decarboxylase	ko:K01571	Biotin_lipoyl,HMGL-like,PYC_OADA	-
contig_1036_np1212_767	CI	paaN	Aldehyde dehydrogenase	ko:K02618	Aldedh,MaoC_dehydratas	GO:0003674,GO:0003824,GO:0004300,GO:0006082,GO:0006725,GO:0006805,GO:0008150,GO:0008152,GO:0009056,GO:0009404,GO:0009407,GO:0009410,GO:0009636,GO:0009850,GO:0009852,GO:0009987,GO:0010124,GO:0010817,GO:0016054,GO:0016491,GO:0016725,GO:0016726,GO:0016787,GO:0016801,GO:0016803,GO:0016822,GO:0016823,GO:0016829,GO:0016835,GO:0016836,GO:0019439,GO:0019748,GO:0019752,GO:0032787,GO:0042178,GO:0042221,GO:…
contig_1036_np1212_4115	CJ	-	Acetyl-CoA hydrolase/transferase N-terminal domain	-	AcetylCoA_hyd_C,AcetylCoA_hydro,Acetyltransf_3	-
contig_1036_np1212_2465	CK	-	FMN_bind	ko:K19339	FMN_bind,Fer4_5	-
contig_1036_np1212_537	CO	-	Thioredoxin-like	-	AhpC-TSA,Redoxin	-
contig_1036_np1212_1270	CO	dsbD	Required to facilitate the formation of correct disulfide bonds in some periplasmic proteins and for the assembly of the periplasmic c-type cytochromes. Acts by transferring electrons from cytoplasmic thioredoxin to the periplasm. This transfer involves a cascade of disulfide bond formation and reduction steps	ko:K04084	DsbC,DsbD,Thioredoxin_7	-
contig_1036_np1212_2207	CO	ccmG	Thiol disulfide interchange protein	ko:K02199	Redoxin	-
contig_1036_np1212_2913	CO	-	Could be a mediator in iron transactions between iron acquisition and iron-requiring processes, such as synthesis and or repair of Fe-S clusters in biosynthetic enzymes	-	Iron_traffic	-
contig_1036_np1212_46	D	-	Sporulation related domain	-	SPOR	-
contig_1036_np1212_340	D	slmA	Required for nucleoid occlusion (NO) phenomenon, which prevents Z-ring formation and cell division over the nucleoid. Acts as a DNA-associated cell division inhibitor that binds simultaneously chromosomal DNA and FtsZ, and disrupts the assembly of FtsZ polymers. SlmA-DNA-binding sequences (SBS) are dispersed on non-Ter regions of the chromosome, preventing FtsZ polymerization at these regions	ko:K05501	TetR_N	-
contig_1036_np1212_486	D	ftsA	Cell division protein that is involved in the assembly of the Z ring. May serve as a membrane anchor for the Z ring	ko:K03590	FtsA,SHS2_FTSA	GO:0000166,GO:0003674,GO:0005488,GO:0005515,GO:0005524,GO:0005575,GO:0005622,GO:0005623,GO:0005737,GO:0005829,GO:0005886,GO:0008144,GO:0008150,GO:0009898,GO:0009987,GO:0016020,GO:0017076,GO:0030554,GO:0032153,GO:0032553,GO:0032555,GO:0032559,GO:0035639,GO:0036094,GO:0042802,GO:0043167,GO:0043168,GO:0044424,GO:0044425,GO:0044444,GO:0044459,GO:0044464,GO:0051301,GO:0071944,GO:0097159,GO:0097367,GO:…
contig_1036_np1212_487	D	ftsZ	Essential cell division protein that forms a contractile ring structure (Z ring) at the future cell division site. The regulation of the ring assembly controls the timing and the location of cell division. One of the functions of the FtsZ ring is to recruit other cell division proteins to the septum to produce a new cell wall between the dividing cells. Binds GTP and shows GTPase activity	ko:K03531	FtsZ_C,Tubulin	-
contig_1036_np1212_685	D	-	Antitoxin component of a toxin-antitoxin (TA) module	-	PhdYeFM_antitox	-
contig_1036_np1212_696	D	-	protein involved in exopolysaccharide biosynthesis	ko:K16554	AAA_31,GNVR,Wzz	-
contig_1036_np1212_701	D	zapE	Reduces the stability of FtsZ polymers in the presence of ATP	ko:K06916	AFG1_ATPase	-
contig_1036_np1212_828	D	tig	Involved in protein export. Acts as a chaperone by maintaining the newly synthesized protein in an open conformation. Functions as a peptidyl-prolyl cis-trans isomerase	ko:K03545	FKBP_C,Trigger_C,Trigger_N	GO:0005575,GO:0005622,GO:0005623,GO:0005737,GO:0044424,GO:0044464
contig_1036_np1212_869	D	-	Cell division inhibitor SulA	-	SulA	-
contig_1036_np1212_923	D	-	DNA replication and repair protein RecF	-	AAA_29,SbcCD_C	-
contig_1036_np1212_985	D	mreB	Rod shape-determining protein	ko:K03569	MreB_Mbl	-
contig_1036_np1212_989	D	maf	Maf-like protein	ko:K06287	Maf	-
contig_1036_np1212_1061	D	yceF	COG0424 Nucleotide-binding protein implicated in inhibition of septum formation	ko:K06287	Maf	GO:0003674,GO:0003824,GO:0016462,GO:0016787,GO:0016817,GO:0016818,GO:0047429
contig_1036_np1212_1333	D	-	Fic/DOC family	-	Fic	-
contig_1036_np1212_1436	D	mrp	Binds and transfers iron-sulfur (Fe-S) clusters to target apoproteins. Can hydrolyze ATP	ko:K03593	FeS_assembly_P,ParA	GO:0005575,GO:0005622,GO:0005623,GO:0005737,GO:0005829,GO:0044424,GO:0044444,GO:0044464
contig_1036_np1212_1498	D	cpoB	Mediates coordination of peptidoglycan synthesis and outer membrane constriction during cell division	-	TPR_16,TPR_6,TolA_bind_tri	GO:0005575,GO:0005623,GO:0008150,GO:0009987,GO:0016043,GO:0022607,GO:0030288,GO:0030313,GO:0031975,GO:0042597,GO:0043933,GO:0044085,GO:0044464,GO:0051259,GO:0051260,GO:0051301,GO:0065003,GO:0071840
contig_1036_np1212_1513	D	-	toxin-antitoxin pair type II binding	-	PhdYeFM_antitox	-
contig_1036_np1212_1545	D	-	Plasmid replication region DNA-binding N-term	-	KfrA_N	-
contig_1036_np1212_1598	D	yefM	Antitoxin component of a toxin-antitoxin (TA) module	ko:K19159	PhdYeFM_antitox	GO:0003674,GO:0003676,GO:0003677,GO:0005488,GO:0006355,GO:0008150,GO:0009889,GO:0009890,GO:0009892,GO:0009987,GO:0010468,GO:0010556,GO:0010558,GO:0010605,GO:0010629,GO:0015643,GO:0019219,GO:0019222,GO:0031323,GO:0031324,GO:0031326,GO:0031327,GO:0042710,GO:0043565,GO:0044010,GO:0044764,GO:0045892,GO:0045934,GO:0048519,GO:0048523,GO:0050789,GO:0050794,GO:0051171,GO:0051172,GO:0051252,GO:0051253,GO:…
contig_1036_np1212_1613	D	yafN	Antitoxin component of a toxin-antitoxin (TA) module	ko:K19161	PhdYeFM_antitox	GO:0006355,GO:0006950,GO:0006974,GO:0008150,GO:0009889,GO:0009987,GO:0010468,GO:0010556,GO:0019219,GO:0019222,GO:0031323,GO:0031326,GO:0033554,GO:0044092,GO:0050789,GO:0050794,GO:0050896,GO:0051171,GO:0051252,GO:0051716,GO:0060255,GO:0065007,GO:0065009,GO:0080090,GO:1903506,GO:2000112,GO:2001141
contig_1036_np1212_1620	D	-	PFAM FecR protein	-	Big_3_2,VCBS	-
contig_1036_np1212_1836	D	-	Antitoxin component of a toxin-antitoxin (TA) module	-	PhdYeFM_antitox	-
contig_1036_np1212_1871	D	-	Antitoxin component of a toxin-antitoxin (TA) module	ko:K18923	PhdYeFM_antitox	-
contig_1036_np1212_1893	D	ftsZ	Essential cell division protein that forms a contractile ring structure (Z ring) at the future cell division site. The regulation of the ring assembly controls the timing and the location of cell division. One of the functions of the FtsZ ring is to recruit other cell division proteins to the septum to produce a new cell wall between the dividing cells. Binds GTP and shows GTPase activity	ko:K03531	FtsZ_C,Tubulin	-
contig_1036_np1212_1894	D	ftsQ	Essential cell division protein. May link together the upstream cell division proteins, which are predominantly cytoplasmic, with the downstream cell division proteins, which are predominantly periplasmic. May control correct divisome assembly	ko:K03589	FtsQ,POTRA_1	-
contig_1036_np1212_1903	D	ftsL	cell division	ko:K03586	FtsL	GO:0000003,GO:0000910,GO:0005575,GO:0005623,GO:0005886,GO:0005887,GO:0007049,GO:0008150,GO:0009987,GO:0016020,GO:0016021,GO:0019954,GO:0022402,GO:0022414,GO:0031224,GO:0031226,GO:0032153,GO:0032505,GO:0043093,GO:0044425,GO:0044459,GO:0044464,GO:0051301,GO:0071944
contig_1036_np1212_2083	D	-	Antitoxin component of a toxin-antitoxin (TA) module	-	PhdYeFM_antitox	-
contig_1036_np1212_2168	D	-	peptidase	-	Peptidase_M23	-
contig_1036_np1212_2204	D	zipA	Essential cell division protein that stabilizes the FtsZ protofilaments by cross-linking them and that serves as a cytoplasmic membrane anchor for the Z ring. Also required for the recruitment to the septal ring of downstream cell division proteins	ko:K03528	ZipA_C	GO:0000278,GO:0000281,GO:0000910,GO:0000917,GO:0005575,GO:0005623,GO:0005886,GO:0005887,GO:0007049,GO:0008150,GO:0009987,GO:0016020,GO:0016021,GO:0016043,GO:0022402,GO:0022607,GO:0031224,GO:0031226,GO:0032153,GO:0032506,GO:0044085,GO:0044425,GO:0044459,GO:0044464,GO:0051301,GO:0061640,GO:0071840,GO:0071944,GO:0090529,GO:1902410,GO:1903047
contig_1036_np1212_2217	D	-	Important for reducing fluoride concentration in the cell, thus reducing its toxicity	ko:K06199	CRCB	-
contig_1036_np1212_2220	D	ftsK	COG1674 DNA segregation ATPase FtsK SpoIIIE and related proteins	ko:K03466	FtsK_4TM,FtsK_SpoIIIE,Ftsk_gamma	-
contig_1036_np1212_2516	D	ispZ	probably involved in intracellular septation	ko:K06190	IspA	-
contig_1036_np1212_2672	D	ftsB	Essential cell division protein. May link together the upstream cell division proteins, which are predominantly cytoplasmic, with the downstream cell division proteins, which are predominantly periplasmic	ko:K05589	DivIC	GO:0000003,GO:0000910,GO:0003674,GO:0005488,GO:0005515,GO:0005575,GO:0005623,GO:0007049,GO:0008150,GO:0009987,GO:0019954,GO:0022402,GO:0022414,GO:0030428,GO:0032153,GO:0032505,GO:0042802,GO:0043093,GO:0044464,GO:0051301
contig_1036_np1212_2675	D	tilS	Ligates lysine onto the cytidine present at position 34 of the AUA codon-specific tRNA(Ile) that contains the anticodon CAU, in an ATP-dependent manner. Cytidine is converted to lysidine, thus changing the amino acid specificity of the tRNA from methionine to isoleucine	ko:K04075	ATP_bind_3	-
contig_1036_np1212_2769	D	-	Mobile mystery protein B	-	Fic	-
contig_1036_np1212_2770	D	-	Mobile mystery protein B	-	Fic	-
contig_1036_np1212_2886	D	xerD	COG4974 Site-specific recombinase XerD	ko:K04763	Phage_int_SAM_1,Phage_integrase	GO:0000150,GO:0003674,GO:0003824,GO:0005575,GO:0005622,GO:0005623,GO:0006139,GO:0006259,GO:0006276,GO:0006310,GO:0006725,GO:0006807,GO:0008150,GO:0008152,GO:0008907,GO:0009009,GO:0009037,GO:0009314,GO:0009628,GO:0009987,GO:0015074,GO:0032991,GO:0034641,GO:0043170,GO:0044237,GO:0044238,GO:0044260,GO:0044424,GO:0044464,GO:0046483,GO:0048476,GO:0050896,GO:0071139,GO:0071704,GO:0090304,GO:0140097,GO:…
contig_1036_np1212_3293	D	-	Cell shape determining protein MreB Mrl	ko:K03569	MreB_Mbl	-
contig_1036_np1212_3328	D	ftsX	Part of the ABC transporter FtsEX involved in cellular division	ko:K09811	FtsX	-
contig_1036_np1212_3329	D	ftsE	cell division ATP-binding protein FtsE	ko:K09812	ABC_tran	-
contig_1036_np1212_3404	D	gidA	NAD-binding protein involved in the addition of a carboxymethylaminomethyl (cmnm) group at the wobble position (U34) of certain tRNAs, forming tRNA-cmnm(5)s(2)U34	ko:K03495	GIDA,GIDA_assoc	-
contig_1036_np1212_3405	D	gidA	NAD-binding protein involved in the addition of a carboxymethylaminomethyl (cmnm) group at the wobble position (U34) of certain tRNAs, forming tRNA-cmnm(5)s(2)U34	ko:K03495	GIDA,GIDA_assoc	-
contig_1036_np1212_3407	D	parA	Chromosome partitioning	ko:K03496	AAA_31	-
contig_1036_np1212_3429	D	-	Antitoxin component of a toxin-antitoxin (TA) module	ko:K19159	PhdYeFM_antitox	-
contig_1036_np1212_3538	D	engB	Necessary for normal cell division and for the maintenance of normal septation	ko:K03978	MMR_HSR1	-
contig_1036_np1212_3585	D	-	Antitoxin Phd_YefM, type II toxin-antitoxin system	ko:K18923	PhdYeFM_antitox	-
contig_1036_np1212_3928	D	-	4Fe-4S iron sulfur cluster binding proteins, NifH/frxC family	ko:K04562	ParA	-
contig_1036_np1212_3934	D	-	PFAM Cobyrinic acid a,c-diamide synthase	ko:K03496	AAA_31	-
contig_1036_np1212_4081	D	zapA	Activator of cell division through the inhibition of FtsZ GTPase activity, therefore promoting FtsZ assembly into bundles of protofilaments necessary for the formation of the division Z ring. It is recruited early at mid-cell but it is not essential for cell division	ko:K09888	ZapA	GO:0000003,GO:0000278,GO:0000281,GO:0000910,GO:0000917,GO:0000921,GO:0003674,GO:0005488,GO:0005515,GO:0005575,GO:0005622,GO:0005623,GO:0005737,GO:0005829,GO:0006996,GO:0007010,GO:0007049,GO:0008150,GO:0009987,GO:0016043,GO:0019954,GO:0022402,GO:0022414,GO:0022607,GO:0030428,GO:0031106,GO:0032153,GO:0032185,GO:0032505,GO:0032506,GO:0034622,GO:0042802,GO:0043093,GO:0043933,GO:0044085,GO:0044424,GO:…
contig_1036_np1212_1837	DJ	-	PFAM Plasmid stabilisation system protein	ko:K06218	ParE_toxin	-
contig_1036_np1212_1870	DJ	-	COG2026 Cytotoxic translational repressor of toxin-antitoxin stability system	ko:K06218	ParE_toxin	-
contig_1036_np1212_3283	DJ	-	ParE-like toxin of type II bacterial toxin-antitoxin system	-	ParE-like_toxin	-
contig_1036_np1212_3584	DJ	relE	ParE toxin of type II toxin-antitoxin system, parDE	ko:K06218	ParE_toxin	-
contig_1036_np1212_3634	DJ	-	ParE-like toxin of type II bacterial toxin-antitoxin system	-	ParE-like_toxin	-
contig_1036_np1212_2667	DM	nlpD	COG0739 Membrane proteins related to metalloendopeptidases	ko:K06194	LysM,Peptidase_M23	-
contig_1036_np1212_3251	DM	-	COG3264 Small-conductance mechanosensitive channel	ko:K05802	MS_channel,MscS_TM,MscS_porin	-
contig_1036_np1212_385	DT	-	COG1718 Serine threonine protein kinase involved in cell cycle control	ko:K07178	RIO1	-
contig_1036_np1212_58	E	proB	Catalyzes the transfer of a phosphate group to glutamate to form L-glutamate 5-phosphate	ko:K00931	AA_kinase,PUA	-
contig_1036_np1212_81	E	-	Spermine/spermidine synthase domain	-	Spermine_synth	-
contig_1036_np1212_116	E	MA20_17250	Peptide opine nickel uptake family ABC transporter, periplasmic substrate-binding protein	ko:K02035	SBP_bac_5	-
contig_1036_np1212_118	E	dadA	Oxidative deamination of D-amino acids	ko:K00285	DAO	-
contig_1036_np1212_125	E	-	Binding-protein-dependent transport system inner membrane component	ko:K09970	BPD_transp_1	-
contig_1036_np1212_127	E	glnQ	ABC-type polar amino acid transport system ATPase component	ko:K02028,ko:K09972	ABC_tran	-
contig_1036_np1212_140	E	-	Belongs to the class-III pyridoxal-phosphate-dependent aminotransferase family	-	Aminotran_3	-
contig_1036_np1212_279	E	-	phospho-2-dehydro-3-deoxyheptonate aldolase	ko:K01626	DAHP_synth_2	-
contig_1036_np1212_281	E	argF	Reversibly catalyzes the transfer of the carbamoyl group from carbamoyl phosphate (CP) to the N(epsilon) atom of ornithine (ORN) to produce L-citrulline	ko:K00611,ko:K09065	OTCace,OTCace_N	-
contig_1036_np1212_286	E	argG	Belongs to the argininosuccinate synthase family. Type 1 subfamily	ko:K01940	Arginosuc_synth	-
contig_1036_np1212_318	E	leuE	Efflux Protein	ko:K11250	LysE	GO:0003333,GO:0003674,GO:0005215,GO:0005342,GO:0005575,GO:0005623,GO:0005886,GO:0006810,GO:0006811,GO:0006812,GO:0006820,GO:0006865,GO:0008150,GO:0008324,GO:0008509,GO:0008514,GO:0015075,GO:0015171,GO:0015175,GO:0015179,GO:0015190,GO:0015318,GO:0015658,GO:0015711,GO:0015803,GO:0015804,GO:0015807,GO:0015820,GO:0015849,GO:0016020,GO:0022857,GO:0034220,GO:0042968,GO:0042970,GO:0044464,GO:0046942,GO:…
contig_1036_np1212_341	E	argB	Belongs to the acetylglutamate kinase family. ArgB subfamily	ko:K00930,ko:K22478	AA_kinase,NAT	GO:0003674,GO:0003824,GO:0003991,GO:0004042,GO:0005488,GO:0006082,GO:0006520,GO:0006525,GO:0006526,GO:0006793,GO:0006796,GO:0006807,GO:0006950,GO:0006974,GO:0008080,GO:0008150,GO:0008152,GO:0008652,GO:0009058,GO:0009064,GO:0009084,GO:0009987,GO:0016053,GO:0016301,GO:0016310,GO:0016407,GO:0016410,GO:0016597,GO:0016740,GO:0016746,GO:0016747,GO:0016772,GO:0016774,GO:0019752,GO:0031406,GO:0033554,GO:…
contig_1036_np1212_345	E	radC	Belongs to the UPF0758 family	ko:K03630	RadC	GO:0006139,GO:0006259,GO:0006281,GO:0006725,GO:0006807,GO:0006950,GO:0006974,GO:0008150,GO:0008152,GO:0009987,GO:0033554,GO:0034641,GO:0043170,GO:0044237,GO:0044238,GO:0044260,GO:0046483,GO:0050896,GO:0051716,GO:0071704,GO:0090304,GO:1901360
contig_1036_np1212_350	E	hppD	4-hydroxyphenylpyruvate dioxygenase	ko:K00457	Glyoxalase,Glyoxalase_5	GO:0001897,GO:0001906,GO:0001907,GO:0003674,GO:0003824,GO:0003868,GO:0006082,GO:0006520,GO:0006570,GO:0006572,GO:0006725,GO:0006807,GO:0008150,GO:0008152,GO:0009056,GO:0009063,GO:0009072,GO:0009074,GO:0009987,GO:0016054,GO:0016491,GO:0016701,GO:0016702,GO:0019439,GO:0019752,GO:0019835,GO:0019836,GO:0031640,GO:0035821,GO:0043436,GO:0044003,GO:0044004,GO:0044179,GO:0044237,GO:0044238,GO:0044248,GO:…
contig_1036_np1212_360	E	-	ABC-type oligopeptide transport system periplasmic component	ko:K02035,ko:K15580	SBP_bac_5	-
contig_1036_np1212_367	E	-	threonine efflux protein	-	LysE	-
contig_1036_np1212_374	E	yejA	COG4166 ABC-type oligopeptide transport system, periplasmic component	ko:K02035,ko:K13893	SBP_bac_5	GO:0005575,GO:0005623,GO:0006810,GO:0006857,GO:0008150,GO:0015833,GO:0015893,GO:0030288,GO:0030313,GO:0031975,GO:0042221,GO:0042493,GO:0042597,GO:0042884,GO:0042886,GO:0042891,GO:0044464,GO:0050896,GO:0051179,GO:0051234,GO:0071702,GO:0071705
contig_1036_np1212_403	E	-	Methylenetetrahydrofolate reductase	-	MTHFR	-
contig_1036_np1212_463	E	-	Belongs to the glutamine synthetase family	ko:K01915	Gln-synt_C	-
contig_1036_np1212_470	E	serC	Catalyzes the reversible conversion of 3- phosphohydroxypyruvate to phosphoserine and of 3-hydroxy-2-oxo-4- phosphonooxybutanoate to phosphohydroxythreonine	ko:K00831	Aminotran_5	GO:0003674,GO:0003824,GO:0004648,GO:0005488,GO:0005575,GO:0005622,GO:0005623,GO:0005737,GO:0005829,GO:0006081,GO:0006082,GO:0006520,GO:0006553,GO:0006563,GO:0006564,GO:0006725,GO:0006732,GO:0006766,GO:0006767,GO:0006793,GO:0006796,GO:0006807,GO:0008144,GO:0008150,GO:0008152,GO:0008483,GO:0008652,GO:0009058,GO:0009066,GO:0009067,GO:0009069,GO:0009070,GO:0009085,GO:0009089,GO:0009108,GO:0009110,GO:…
contig_1036_np1212_471	E	pheA	Prephenate dehydratase	ko:K14170	ACT,CM_2,PDT	-
contig_1036_np1212_472	E	aroA	Catalyzes the transfer of the enolpyruvyl moiety of phosphoenolpyruvate (PEP) to the 5-hydroxyl of shikimate-3- phosphate (S3P) to produce enolpyruvyl shikimate-3-phosphate and inorganic phosphate	ko:K00210,ko:K00800	EPSP_synthase,PDH	-
contig_1036_np1212_488	E	-	PFAM peptidase M14 carboxypeptidase A	-	Peptidase_M14	-
contig_1036_np1212_492	E	-	Involved in the biosynthesis of the chorismate, which leads to the biosynthesis of aromatic amino acids. Catalyzes the reversible NADPH linked reduction of 3-dehydroshikimate (DHSA) to yield shikimate (SA)	ko:K00014	Shikimate_dh_N	-
contig_1036_np1212_495	E	gloA	Glyoxalase/Bleomycin resistance protein/Dioxygenase superfamily	ko:K01759	Glyoxalase	-
contig_1036_np1212_500	E	-	M18 family aminopeptidase	ko:K01267	Peptidase_M18	-
contig_1036_np1212_502	E	-	Alanine dehydrogenase/PNT, N-terminal domain	ko:K00290	AlaDh_PNT_C,AlaDh_PNT_N	-
contig_1036_np1212_511	E	-	Bacterial extracellular solute-binding protein	ko:K11069	SBP_bac_8,TAT_signal	-
contig_1036_np1212_512	E	-	TOBE domain	ko:K11072	ABC_tran,TOBE_2	-
contig_1036_np1212_514	E	-	COG1177 ABC-type spermidine putrescine transport system, permease component II	ko:K11070	BPD_transp_1	-
contig_1036_np1212_531	E	-	ABC-type branched-chain amino acid transport systems ATPase component	ko:K01996	ABC_tran	-
contig_1036_np1212_532	E	-	branched-chain amino acid	ko:K01995	ABC_tran,BCA_ABC_TP_C	-
contig_1036_np1212_533	E	-	Branched-chain amino acid transport system / permease component	-	BPD_transp_2	-
contig_1036_np1212_534	E	-	Branched-chain amino acid transport system / permease component	-	BPD_transp_2	-
contig_1036_np1212_535	E	-	COG0683 ABC-type branched-chain amino acid transport systems, periplasmic component	ko:K01999	Peripla_BP_6,TAT_signal	-
contig_1036_np1212_547	E	mtnN	Catalyzes the irreversible cleavage of the glycosidic bond in both 5'-methylthioadenosine (MTA) and S- adenosylhomocysteine (SAH AdoHcy) to adenine and the corresponding thioribose, 5'-methylthioribose and S-ribosylhomocysteine, respectively	ko:K01243	PNP_UDP_1	-
contig_1036_np1212_593	E	aroQ	Catalyzes a trans-dehydration via an enolate intermediate	ko:K03786	DHquinase_II	-
contig_1036_np1212_632	E	ordL	oxidoreductase	ko:K09471	DAO	GO:0003674,GO:0003824,GO:0005575,GO:0005622,GO:0005623,GO:0005737,GO:0008150,GO:0008152,GO:0016491,GO:0044424,GO:0044464,GO:0055114
contig_1036_np1212_633	E	spuC	Belongs to the class-III pyridoxal-phosphate-dependent aminotransferase family	ko:K12256	Aminotran_3	-
contig_1036_np1212_634	E	-	Glutamine synthetase, catalytic domain	-	Gln-synt_C	-
contig_1036_np1212_636	E	potF	Required for the activity of the bacterial periplasmic transport system of putrescine	ko:K11073	SBP_bac_6,SBP_bac_8	-
contig_1036_np1212_640	E	speB	Belongs to the arginase family	ko:K01480	Arginase	-
contig_1036_np1212_641	E	glnA	glutamine synthetase	ko:K01915	Gln-synt_C	GO:0003674,GO:0003824,GO:0006576,GO:0006595,GO:0006598,GO:0006807,GO:0008150,GO:0008152,GO:0009056,GO:0009308,GO:0009310,GO:0009445,GO:0009447,GO:0009987,GO:0016874,GO:0016879,GO:0016880,GO:0034024,GO:0034641,GO:0042402,GO:0044106,GO:0044237,GO:0071704,GO:0097164,GO:1901564,GO:1901565,GO:1901575
contig_1036_np1212_646	E	csd	Catalyzes the removal of elemental sulfur and selenium atoms from L-cysteine, L-cystine, L-selenocysteine, and L- selenocystine to produce L-alanine	-	Aminotran_5	-
contig_1036_np1212_746	E	kynA	Heme-dependent dioxygenase that catalyzes the oxidative cleavage of the L-tryptophan (L-Trp) pyrrole ring and converts L- tryptophan to N-formyl-L-kynurenine. Catalyzes the oxidative cleavage of the indole moiety	ko:K00453	Trp_dioxygenase	GO:0003674,GO:0003824,GO:0004833,GO:0005488,GO:0006082,GO:0006084,GO:0006139,GO:0006163,GO:0006520,GO:0006568,GO:0006569,GO:0006576,GO:0006586,GO:0006637,GO:0006725,GO:0006732,GO:0006753,GO:0006790,GO:0006793,GO:0006796,GO:0006807,GO:0008150,GO:0008152,GO:0009056,GO:0009063,GO:0009072,GO:0009074,GO:0009117,GO:0009150,GO:0009259,GO:0009308,GO:0009310,GO:0009987,GO:0016043,GO:0016054,GO:0016491,GO:…
contig_1036_np1212_747	E	-	COG0683 ABC-type branched-chain amino acid transport systems, periplasmic component	ko:K01999	Peripla_BP_6	-
contig_1036_np1212_748	E	-	Belongs to the binding-protein-dependent transport system permease family	ko:K01997	BPD_transp_2	-
contig_1036_np1212_749	E	-	Belongs to the binding-protein-dependent transport system permease family	ko:K01998	BPD_transp_2	-
contig_1036_np1212_750	E	-	branched-chain amino acid	ko:K01995	ABC_tran,BCA_ABC_TP_C	-
contig_1036_np1212_751	E	MA20_22545	ATPases associated with a variety of cellular activities	ko:K01996	ABC_tran	-
contig_1036_np1212_794	E	gdhB	NAD-specific glutamate dehydrogenase	ko:K15371	Bac_GDH	-
contig_1036_np1212_795	E	-	Dehydrogenase	ko:K15371	Bac_GDH	-
contig_1036_np1212_798	E	leuC	Catalyzes the isomerization between 2-isopropylmalate and 3-isopropylmalate, via the formation of 2-isopropylmaleate	ko:K01703	Aconitase	-
contig_1036_np1212_799	E	leuC	Catalyzes the isomerization between 2-isopropylmalate and 3-isopropylmalate, via the formation of 2-isopropylmaleate	ko:K01703	Aconitase	-
contig_1036_np1212_800	E	leuD	Catalyzes the isomerization between 2-isopropylmalate and 3-isopropylmalate, via the formation of 2-isopropylmaleate	ko:K01704	Aconitase_C	-
contig_1036_np1212_835	E	argC	Catalyzes the NADPH-dependent reduction of N-acetyl-5- glutamyl phosphate to yield N-acetyl-L-glutamate 5-semialdehyde	ko:K00145	Semialdhyde_dh,Semialdhyde_dhC	-
contig_1036_np1212_842	E	-	Methylenetetrahydrofolate reductase	ko:K00297	MTHFR,MTHFR_C	-
contig_1036_np1212_843	E	metF	Methylenetetrahydrofolate reductase	ko:K00297,ko:K00547	MTHFR	-
contig_1036_np1212_849	E	-	Aminotransferase class-V	-	Aminotran_5	-
contig_1036_np1212_851	E	-	aminotransferase	-	Aminotran_5	-
contig_1036_np1212_861	E	aroA	Catalyzes the transfer of the enolpyruvyl moiety of phosphoenolpyruvate (PEP) to the 5-hydroxyl of shikimate-3- phosphate (S3P) to produce enolpyruvyl shikimate-3-phosphate and inorganic phosphate	ko:K00800	EPSP_synthase	-
contig_1036_np1212_892	E	-	Glutathionylspermidine synthase	ko:K01460	CHAP,GSP_synth	-
contig_1036_np1212_900	E	pepQ	Belongs to the peptidase M24B family	ko:K01262,ko:K01271	Creatinase_N,Peptidase_M24	-
contig_1036_np1212_904	E	-	Bacterial extracellular solute-binding proteins, family 5 Middle	ko:K12368	SBP_bac_5	-
contig_1036_np1212_918	E	metY	O-acetylhomoserine sulfhydrylase	ko:K01740	Cys_Met_Meta_PP	-
contig_1036_np1212_949	E	-	L-asparaginase II	-	Asparaginase_II	-
contig_1036_np1212_963	E	-	Gamma-glutamyltranspeptidase	ko:K00681	G_glu_transpept	-
contig_1036_np1212_966	E	-	Glutamate decarboxylase and related PLP-dependent	ko:K01580,ko:K13745	Pyridoxal_deC	-
contig_1036_np1212_975	E	-	COG1073 Hydrolases of the alpha beta superfamily	ko:K06889	Hydrolase_4,Peptidase_S15	-
contig_1036_np1212_1016	E	hisG	Catalyzes the condensation of ATP and 5-phosphoribose 1- diphosphate to form N'-(5'-phosphoribosyl)-ATP (PR-ATP). Has a crucial role in the pathway because the rate of histidine biosynthesis seems to be controlled primarily by regulation of HisG enzymatic activity	ko:K00765	HisG	-
contig_1036_np1212_1017	E	hisD	Catalyzes the sequential NAD-dependent oxidations of L- histidinol to L-histidinaldehyde and then to L-histidine	ko:K00013	Histidinol_dh	-
contig_1036_np1212_1021	E	-	hydroxy-methylglutaryl-CoA lyase	ko:K01640	HMGL-like	-
contig_1036_np1212_1026	E	-	The beta subunit is responsible for the synthesis of L- tryptophan from indole and L-serine	-	PALP	-
contig_1036_np1212_1047	E	ltaE	Beta-eliminating lyase	ko:K01620	Beta_elim_lyase	-
contig_1036_np1212_1084	E	mvaB	COG0119 Isopropylmalate homocitrate citramalate synthases	ko:K01640	HMGL-like	-
contig_1036_np1212_1106	E	-	Glyoxalase/Bleomycin resistance protein/Dioxygenase superfamily	-	Glyoxalase	-
contig_1036_np1212_1123	E	-	Aminotransferase	ko:K00813,ko:K00832	Aminotran_1_2	-
contig_1036_np1212_1132	E	-	Lysine exporter protein (LysE	-	LysE	-
contig_1036_np1212_1147	E	-	Branched-chain amino acid ATP-binding cassette transporter	ko:K01995,ko:K01998	ABC_tran,BCA_ABC_TP_C	-
contig_1036_np1212_1149	E	-	Belongs to the binding-protein-dependent transport system permease family	ko:K01997	BPD_transp_2	-
contig_1036_np1212_1150	E	-	Belongs to the binding-protein-dependent transport system permease family	ko:K01998	BPD_transp_2	-
contig_1036_np1212_1151	E	-	Periplasmic binding protein	ko:K01999	Peripla_BP_6	-
contig_1036_np1212_1152	E	livF3	ATPases associated with a variety of cellular activities	ko:K01996	ABC_tran	-
contig_1036_np1212_1156	E	-	FAD dependent oxidoreductase	-	DAO	-
contig_1036_np1212_1160	E	pip	Belongs to the peptidase S33 family	ko:K01259	Abhydrolase_1	-
contig_1036_np1212_1198	E	pheA	Prephenate dehydratase	ko:K04518,ko:K14170	ACT,CM_2,PDT	-
contig_1036_np1212_1200	E	mdeA_1	PFAM Cys Met metabolism	ko:K01739,ko:K01740	Cys_Met_Meta_PP	-
contig_1036_np1212_1251	E	occMch	ABC transporter (Permease	ko:K10019	BPD_transp_1	-
contig_1036_np1212_1252	E	occQ	ABC transporter (Permease	ko:K10020	BPD_transp_1	-
contig_1036_np1212_1254	E	HA62_27665	COG4598 ABC-type histidine transport system, ATPase component	ko:K02028	ABC_tran	-
contig_1036_np1212_1260	E	aroF-1	Stereospecific condensation of phosphoenolpyruvate (PEP) and D-erythrose-4-phosphate (E4P) giving rise to 3-deoxy-D- arabino-heptulosonate-7-phosphate (DAHP)	ko:K01626	DAHP_synth_1	-
contig_1036_np1212_1284	E	-	N-formylglutamate amidohydrolase	-	FGase	-
contig_1036_np1212_1291	E	pip	Belongs to the peptidase S33 family	ko:K01259	Abhydrolase_1	-
contig_1036_np1212_1292	E	avtA	Aminotransferase class I and II	ko:K00835	Aminotran_1_2	-
contig_1036_np1212_1295	E	hutU	Catalyzes the conversion of urocanate to 4-imidazolone- 5-propionate	ko:K01712	Urocanase,Urocanase_C,Urocanase_N	GO:0003674,GO:0003824,GO:0006082,GO:0006520,GO:0006547,GO:0006548,GO:0006725,GO:0006807,GO:0008150,GO:0008152,GO:0009056,GO:0009063,GO:0009987,GO:0016054,GO:0016153,GO:0016829,GO:0016835,GO:0016836,GO:0019439,GO:0019752,GO:0034641,GO:0043436,GO:0044237,GO:0044238,GO:0044248,GO:0044270,GO:0044281,GO:0044282,GO:0046395,GO:0046483,GO:0046700,GO:0052803,GO:0052805,GO:0071704,GO:1901360,GO:1901361,GO:…
contig_1036_np1212_1296	E	hutH	Histidine ammonia-lyase	ko:K01745	Lyase_aromatic	GO:0003674,GO:0003824,GO:0004397,GO:0006082,GO:0006520,GO:0006807,GO:0008150,GO:0008152,GO:0009987,GO:0016829,GO:0016840,GO:0016841,GO:0019752,GO:0043436,GO:0044237,GO:0044238,GO:0044281,GO:0071704,GO:1901564
contig_1036_np1212_1302	E	-	GDSL-like Lipase/Acylhydrolase family	-	Lipase_GDSL_2	-
contig_1036_np1212_1308	E	-	Bacterial extracellular solute-binding proteins, family 5 Middle	ko:K02035	SBP_bac_5	-
contig_1036_np1212_1309	E	-	Membrane dipeptidase (Peptidase family M19)	ko:K01273	Peptidase_M19	-
contig_1036_np1212_1363	E	ptrB	Prolyl oligopeptidase, N-terminal beta-propeller domain	ko:K01354	Peptidase_S9,Peptidase_S9_N	GO:0003674,GO:0003824,GO:0004175,GO:0004252,GO:0005575,GO:0005622,GO:0005623,GO:0005737,GO:0006508,GO:0006807,GO:0008150,GO:0008152,GO:0008233,GO:0008236,GO:0016787,GO:0017171,GO:0019538,GO:0043170,GO:0044238,GO:0044424,GO:0044464,GO:0070011,GO:0070012,GO:0071704,GO:0140096,GO:1901564
contig_1036_np1212_1372	E	trpA	The alpha subunit is responsible for the aldol cleavage of indoleglycerol phosphate to indole and glyceraldehyde 3- phosphate	ko:K01695	Trp_syntA	-
contig_1036_np1212_1373	E	trpB	The beta subunit is responsible for the synthesis of L- tryptophan from indole and L-serine	ko:K01696	PALP	-
contig_1036_np1212_1374	E	-	N-(5'phosphoribosyl)anthranilate (PRA) isomerase	-	PRAI	-
contig_1036_np1212_1377	E	asd	Catalyzes the NADPH-dependent formation of L-aspartate- semialdehyde (L-ASA) by the reductive dephosphorylation of L- aspartyl-4-phosphate	ko:K00133	Semialdhyde_dh,Semialdhyde_dhC	GO:0000096,GO:0000097,GO:0003674,GO:0003824,GO:0004073,GO:0006082,GO:0006520,GO:0006549,GO:0006553,GO:0006555,GO:0006566,GO:0006790,GO:0006807,GO:0008150,GO:0008152,GO:0008652,GO:0009058,GO:0009066,GO:0009067,GO:0009081,GO:0009082,GO:0009085,GO:0009086,GO:0009088,GO:0009089,GO:0009097,GO:0009987,GO:0016053,GO:0016491,GO:0016620,GO:0016903,GO:0019752,GO:0043436,GO:0043648,GO:0044237,GO:0044238,GO:…
contig_1036_np1212_1378	E	asd	Catalyzes the NADPH-dependent formation of L-aspartate- semialdehyde (L-ASA) by the reductive dephosphorylation of L- aspartyl-4-phosphate	ko:K00133	Semialdhyde_dh,Semialdhyde_dhC	-
contig_1036_np1212_1397	E	-	Lysine transporter LysE	-	LysE	-
contig_1036_np1212_1402	E	sufS	Catalyzes the removal of elemental sulfur and selenium atoms from L-cysteine, L-cystine, L-selenocysteine, and L- selenocystine to produce L-alanine	ko:K11717	Aminotran_5,SufE	-
contig_1036_np1212_1406	E	-	FAD dependent oxidoreductase	-	DAO	-
contig_1036_np1212_1418	E	sufS	Cysteine desulfurases mobilize the sulfur from L- cysteine to yield L-alanine, an essential step in sulfur metabolism for biosynthesis of a variety of sulfur-containing biomolecules. Component of the suf operon, which is activated and required under specific conditions such as oxidative stress and iron limitation. Acts as a potent selenocysteine lyase in vitro, that mobilizes selenium from L-sele…	ko:K01766,ko:K11717	Aminotran_5,SufE	-
contig_1036_np1212_1428	E	aroC	Catalyzes the anti-1,4-elimination of the C-3 phosphate and the C-6 proR hydrogen from 5-enolpyruvylshikimate-3-phosphate (EPSP) to yield chorismate, which is the branch point compound that serves as the starting substrate for the three terminal pathways of aromatic amino acid biosynthesis. This reaction introduces a second double bond into the aromatic ring system	ko:K01736	Chorismate_synt	-
contig_1036_np1212_1451	E	gabT	Belongs to the class-III pyridoxal-phosphate-dependent aminotransferase family	ko:K07250	Aminotran_3	-
contig_1036_np1212_1463	E	-	Belongs to the peptidase S51 family	ko:K13282	Peptidase_S51	-
contig_1036_np1212_1525	E	-	Tetrahydrodipicolinate N-succinyltransferase middle	ko:K00674	Hexapep_2,THDPS_M	-
contig_1036_np1212_1526	E	-	Glyoxalase/Bleomycin resistance protein/Dioxygenase superfamily	-	Glyoxalase	-
contig_1036_np1212_1527	E	-	GDSL-like Lipase/Acylhydrolase family	-	Lipase_GDSL_2	-
contig_1036_np1212_1557	E	hutG	N-formylglutamate amidohydrolase	ko:K01458,ko:K01479	FGase	-
contig_1036_np1212_1567	E	metH	Methionine synthase	ko:K00548	B12-binding,B12-binding_2,Met_synt_B12,Pterin_bind,S-methyl_trans	-
contig_1036_np1212_1569	E	cysK	Belongs to the cysteine synthase cystathionine beta- synthase family	ko:K01738	PALP	-
contig_1036_np1212_1574	E	-	LysE type translocator	-	LysE	-
contig_1036_np1212_1580	E	-	Binding-protein-dependent transport system inner membrane component	ko:K02029	BPD_transp_1	-
contig_1036_np1212_1581	E	artM	transporter, permease	-	BPD_transp_1	-
contig_1036_np1212_1582	E	-	ATP-binding protein	ko:K10017	ABC_tran	-
contig_1036_np1212_1586	E	-	Glyoxalase/Bleomycin resistance protein/Dioxygenase superfamily	-	Glyoxalase	-
contig_1036_np1212_1629	E	glsA	Belongs to the glutaminase family	ko:K01425	Glutaminase	-
contig_1036_np1212_1636	E	thiO	FAD dependent oxidoreductase	ko:K03153	DAO	-
contig_1036_np1212_1643	E	hisC	Belongs to the class-II pyridoxal-phosphate-dependent aminotransferase family. Histidinol-phosphate aminotransferase subfamily	ko:K00817	Aminotran_1_2	-
contig_1036_np1212_1652	E	speA	arginine decarboxylase	ko:K01585	Orn_Arg_deC_N	-
contig_1036_np1212_1653	E	-	Saccharopine dehydrogenase C-terminal domain	ko:K00290	Sacchrp_dh_C,Sacchrp_dh_NADP	-
contig_1036_np1212_1654	E	-	Belongs to the Orn Lys Arg decarboxylase class-II family. NspC subfamily	ko:K13747	Orn_DAP_Arg_deC	-
contig_1036_np1212_1655	E	-	Belongs to the arginase family	ko:K01480	Arginase	-
contig_1036_np1212_1666	E	-	Catalyzes the alpha,beta-elimination reaction of D- cysteine and of several D-cysteine derivatives. It could be a defense mechanism against D-cysteine	ko:K05396,ko:K17950	PALP	-
contig_1036_np1212_1671	E	-	The alpha subunit is responsible for the aldol cleavage of indoleglycerol phosphate to indole and glyceraldehyde 3- phosphate	ko:K01695	Trp_syntA	-
contig_1036_np1212_1672	E	-	The beta subunit is responsible for the synthesis of L- tryptophan from indole and L-serine	ko:K01696	PALP	-
contig_1036_np1212_1678	E	-	FAD dependent oxidoreductase central domain	-	DAO,FAO_M,GCV_T,GCV_T_C	-
contig_1036_np1212_1704	E	iadA	Catalyzes the hydrolytic cleavage of a subset of L- isoaspartyl (L-beta-aspartyl) dipeptides. Used to degrade proteins damaged by L-isoaspartyl residues formation	ko:K01305	Amidohydro_1,Amidohydro_3	GO:0003674,GO:0003824,GO:0005488,GO:0005515,GO:0005575,GO:0005622,GO:0005623,GO:0005737,GO:0005829,GO:0006508,GO:0006807,GO:0008150,GO:0008152,GO:0008233,GO:0008238,GO:0008242,GO:0008270,GO:0008798,GO:0016787,GO:0019538,GO:0042802,GO:0043167,GO:0043169,GO:0043170,GO:0044238,GO:0044424,GO:0044444,GO:0044464,GO:0046872,GO:0046914,GO:0070011,GO:0071704,GO:0140096,GO:1901564
contig_1036_np1212_1738	E	-	Belongs to the ABC transporter superfamily	ko:K02010	ABC_tran,TOBE_2	-
contig_1036_np1212_1749	E	argJ	Catalyzes two activities which are involved in the cyclic version of arginine biosynthesis the synthesis of N- acetylglutamate from glutamate and acetyl-CoA as the acetyl donor, and of ornithine by transacetylation between N(2)-acetylornithine and glutamate	ko:K00620	ArgJ	-
contig_1036_np1212_1759	E	metAS	Transfers a succinyl group from succinyl-CoA to L- homoserine, forming succinyl-L-homoserine	ko:K00651	HTS	GO:0000096,GO:0000097,GO:0003674,GO:0003824,GO:0006082,GO:0006520,GO:0006555,GO:0006790,GO:0006807,GO:0008150,GO:0008152,GO:0008374,GO:0008652,GO:0008899,GO:0009058,GO:0009066,GO:0009067,GO:0009086,GO:0009987,GO:0016053,GO:0016740,GO:0016746,GO:0016747,GO:0016748,GO:0016750,GO:0019752,GO:0043436,GO:0044237,GO:0044238,GO:0044249,GO:0044272,GO:0044281,GO:0044283,GO:0046394,GO:0071704,GO:1901564,GO:…
contig_1036_np1212_1764	E	-	arginine N-succinyltransferase	ko:K00673	AstA	-
contig_1036_np1212_1781	E	-	Spermidine synthase	-	Spermine_synth	-
contig_1036_np1212_1787	E	-	Histidinol-phosphate aromatic aminotransferase and cobyric acid decarboxylase	ko:K02225	Aminotran_1_2	-
contig_1036_np1212_1817	E	cysM	Belongs to the cysteine synthase cystathionine beta- synthase family	ko:K12339	PALP	GO:0000096,GO:0000097,GO:0003674,GO:0003824,GO:0004124,GO:0005488,GO:0005575,GO:0005622,GO:0005623,GO:0005737,GO:0006082,GO:0006520,GO:0006534,GO:0006535,GO:0006563,GO:0006790,GO:0006807,GO:0008144,GO:0008150,GO:0008152,GO:0008652,GO:0009058,GO:0009069,GO:0009070,GO:0009987,GO:0016053,GO:0016740,GO:0016765,GO:0016829,GO:0016846,GO:0019344,GO:0019752,GO:0019842,GO:0030170,GO:0036094,GO:0043167,GO:…
contig_1036_np1212_1830	E	-	Glyoxalase/Bleomycin resistance protein/Dioxygenase superfamily	ko:K01759	Glyoxalase	-
contig_1036_np1212_1832	E	-	AAA domain	-	AAA_18	-
contig_1036_np1212_1934	E	-	dipeptide transport	ko:K02035	B_lectin,SBP_bac_5	-
contig_1036_np1212_1954	E	-	COG0747 ABC-type dipeptide transport system, periplasmic component	ko:K02035	SBP_bac_5	-
contig_1036_np1212_1955	E	-	Bacterial extracellular solute-binding proteins, family 5 Middle	ko:K02035	SBP_bac_5	-
contig_1036_np1212_1964	E	leuA	Catalyzes the condensation of the acetyl group of acetyl-CoA with 3-methyl-2-oxobutanoate (2-oxoisovalerate) to form 3-carboxy-3-hydroxy-4-methylpentanoate (2-isopropylmalate)	ko:K01649	HMGL-like,LeuA_dimer	-
contig_1036_np1212_1972	E	-	Prephenate dehydratase	ko:K04518	PDT	-
contig_1036_np1212_1976	E	-	5-carboxymethyl-2-hydroxymuconate isomerase	ko:K01826	-	-
contig_1036_np1212_1986	E	kynU	Catalyzes the cleavage of L-kynurenine (L-Kyn) and L-3- hydroxykynurenine (L-3OHKyn) into anthranilic acid (AA) and 3- hydroxyanthranilic acid (3-OHAA), respectively	ko:K01556	Aminotran_5	-
contig_1036_np1212_2001	E	-	COG0346 Lactoylglutathione lyase and related lyases	-	Glyoxalase	-
contig_1036_np1212_2007	E	-	Allophanate hydrolase	-	CT_C_D	-
contig_1036_np1212_2008	E	-	Allophanate hydrolase	-	CT_A_B	-
contig_1036_np1212_2050	E	metB	COG0626 Cystathionine beta-lyases cystathionine gamma-synthases	ko:K01739	Cys_Met_Meta_PP	-
contig_1036_np1212_2051	E	lys2	And related proteins	ko:K00293,ko:K19064	Sacchrp_dh_C,Sacchrp_dh_NADP	-
contig_1036_np1212_2060	E	-	FAD dependent oxidoreductase central domain	-	DAO,FAO_M,GCV_T,GCV_T_C	-
contig_1036_np1212_2063	E	eamB	Lysine exporter protein (LYSE YGGA)	-	LysE	-
contig_1036_np1212_2065	E	gcvP	The glycine cleavage system catalyzes the degradation of glycine. The P protein binds the alpha-amino group of glycine through its pyridoxal phosphate cofactor	ko:K00281,ko:K00283	GDC-P	-
contig_1036_np1212_2066	E	gcvH	The glycine cleavage system catalyzes the degradation of glycine. The H protein shuttles the methylamine group of glycine from the P protein to the T protein	ko:K02437	GCV_H	-
contig_1036_np1212_2067	E	glyA	Catalyzes the reversible interconversion of serine and glycine with tetrahydrofolate (THF) serving as the one-carbon carrier. This reaction serves as the major source of one-carbon groups required for the biosynthesis of purines, thymidylate, methionine, and other important biomolecules. Also exhibits THF- independent aldolase activity toward beta-hydroxyamino acids, producing glycine and aldehyd…	ko:K00600	SHMT	-
contig_1036_np1212_2068	E	-	Serine dehydratase	-	SDH_alpha,SDH_beta	-
contig_1036_np1212_2069	E	gcvT	Catalyzes the transfer of a methylene carbon from the methylamine-loaded GcvH protein to tetrahydrofolate, causing the release of ammonia and the generation of reduced GcvH protein	ko:K00605	GCV_T,GCV_T_C	-
contig_1036_np1212_2070	E	serB	phosphoserine phosphatase	ko:K01079	ACT_6,HAD,Hydrolase	GO:0000287,GO:0001505,GO:0003674,GO:0003824,GO:0004647,GO:0005488,GO:0005575,GO:0005622,GO:0005623,GO:0005737,GO:0006082,GO:0006520,GO:0006544,GO:0006545,GO:0006563,GO:0006564,GO:0006793,GO:0006796,GO:0006807,GO:0008150,GO:0008152,GO:0008652,GO:0009058,GO:0009069,GO:0009070,GO:0009987,GO:0016053,GO:0016311,GO:0016787,GO:0016788,GO:0016791,GO:0017144,GO:0019752,GO:0042133,GO:0042136,GO:0042578,GO:…
contig_1036_np1212_2118	E	-	Oxidative deamination of D-amino acids	ko:K00285	DAO	-
contig_1036_np1212_2175	E	-	Zinc carboxypeptidase	-	Peptidase_M14	-
contig_1036_np1212_2182	E	glnA	highly regulated protein controlled by the addition removal of adenylyl groups by adenylyltransferase from specific tyrosine residues	ko:K01915	Gln-synt_C,Gln-synt_N	-
contig_1036_np1212_2186	E	-	Aminotransferase class I and II	ko:K12252,ko:K14287	Aminotran_1_2	-
contig_1036_np1212_2187	E	-	Belongs to the HisA HisF family	ko:K01814	His_biosynth	-
contig_1036_np1212_2190	E	-	PFAM aminotransferase class V	-	Aminotran_5	-
contig_1036_np1212_2195	E	XCC2022	Protein of unknown function (DUF2817)	-	AstE_AspA,DUF2817,Peptidase_M14	-
contig_1036_np1212_2200	E	mnmC	Catalyzes the last two steps in the biosynthesis of 5- methylaminomethyl-2-thiouridine (mnm(5)s(2)U) at the wobble position (U34) in tRNA. Catalyzes the FAD-dependent demodification of cmnm(5)s(2)U34 to nm(5)s(2)U34, followed by the transfer of a methyl group from S-adenosyl-L-methionine to nm(5)s(2)U34, to form mnm(5)s(2)U34	ko:K15461	DAO,Methyltransf_30	-
contig_1036_np1212_2228	E	tyrA	chorismate mutase	ko:K04092	CM_2	-
contig_1036_np1212_2260	E	pepA	Presumably involved in the processing and regular turnover of intracellular proteins. Catalyzes the removal of unsubstituted N-terminal amino acids from various peptides	ko:K01255	Peptidase_M17,Peptidase_M17_N	-
contig_1036_np1212_2326	E	spsC	Belongs to the DegT DnrJ EryC1 family	-	DegT_DnrJ_EryC1	-
contig_1036_np1212_2351	E	dsdA	Belongs to the serine threonine dehydratase family. DsdA subfamily	ko:K01753	PALP	GO:0003674,GO:0003824,GO:0005488,GO:0005575,GO:0005622,GO:0005623,GO:0005737,GO:0005829,GO:0006082,GO:0006520,GO:0006807,GO:0006950,GO:0006974,GO:0008144,GO:0008150,GO:0008152,GO:0008721,GO:0009056,GO:0009063,GO:0009069,GO:0009071,GO:0009636,GO:0009987,GO:0016054,GO:0016829,GO:0016835,GO:0016836,GO:0016840,GO:0016841,GO:0017144,GO:0019478,GO:0019752,GO:0019842,GO:0030170,GO:0033554,GO:0036088,GO:…
contig_1036_np1212_2368	E	-	LysE type translocator	-	LysE	-
contig_1036_np1212_2375	E	ald	Belongs to the AlaDH PNT family	ko:K00259	AlaDh_PNT_C,AlaDh_PNT_N	-
contig_1036_np1212_2377	E	-	Glyoxalase-like domain	-	-	-
contig_1036_np1212_2408	E	argD	acetylornithine aminotransferase	ko:K00821,ko:K00840	Aminotran_3	-
contig_1036_np1212_2409	E	-	Acetylornithine deacetylase	ko:K01295	M20_dimer,Peptidase_M20,Peptidase_M28	-
contig_1036_np1212_2410	E	aruF	arginine N-succinyltransferase	ko:K00673	AstA	-
contig_1036_np1212_2411	E	-	arginine N-succinyltransferase	ko:K00673	AstA	-
contig_1036_np1212_2413	E	astB	Catalyzes the hydrolysis of N(2)-succinylarginine into N(2)-succinylornithine, ammonia and CO(2)	ko:K01484	AstB	-
contig_1036_np1212_2417	E	pepN	aminopeptidase N	ko:K01256	DUF3458,DUF3458_C,Peptidase_M1	-
contig_1036_np1212_2423	E	-	Catalyzes the alpha,beta-elimination reaction of D- cysteine and of several D-cysteine derivatives. It could be a defense mechanism against D-cysteine	ko:K01505	PALP	-
contig_1036_np1212_2426	E	alaA	in Corynebacterium glutamicum this protein can use glutamate, 2-aminobutyrate, and aspartate as amino donors and pyruvate as the acceptor	ko:K14260	Aminotran_1_2	-
contig_1036_np1212_2432	E	alr	Catalyzes the interconversion of L-alanine and D- alanine. May also act on other amino acids	ko:K01775	Ala_racemase_C,Ala_racemase_N	-
contig_1036_np1212_2436	E	ybiB	Glycosyl transferase family, helical bundle domain	-	Glycos_trans_3N,Glycos_transf_3	GO:0003674,GO:0003676,GO:0003677,GO:0003723,GO:0005488,GO:0005575,GO:0005622,GO:0005623,GO:0005737,GO:0005829,GO:0044424,GO:0044444,GO:0044464,GO:0097159,GO:1901363
contig_1036_np1212_2444	E	dapA	Catalyzes the condensation of (S)-aspartate-beta- semialdehyde (S)-ASA and pyruvate to 4-hydroxy- tetrahydrodipicolinate (HTPA)	ko:K01714	DHDPS	-
contig_1036_np1212_2472	E	potC	Binding-protein-dependent transport system inner membrane component	ko:K02053	BPD_transp_1	-
contig_1036_np1212_2473	E	-	Binding-protein-dependent transport system inner membrane component	-	BPD_transp_1	-
contig_1036_np1212_2474	E	-	Bacterial extracellular solute-binding protein	-	SBP_bac_8	-
contig_1036_np1212_2475	E	potA	TOBE domain	ko:K02052	ABC_tran,TOBE_2	-
contig_1036_np1212_2476	E	MA20_23475	COG0683 ABC-type branched-chain amino acid transport systems, periplasmic component	ko:K01999	Peripla_BP_6	-
contig_1036_np1212_2483	E	-	Branched-chain amino acid transport system / permease component	ko:K01998	BPD_transp_2	-
contig_1036_np1212_2484	E	-	Branched-chain amino acid transport system / permease component	ko:K01997	BPD_transp_2	-
contig_1036_np1212_2485	E	MA20_23485	COG0410 ABC-type branched-chain amino acid transport systems ATPase component	ko:K01996	ABC_tran	-
contig_1036_np1212_2486	E	-	PFAM ABC transporter	ko:K01995	ABC_tran,BCA_ABC_TP_C	-
contig_1036_np1212_2489	E	nocQ	ABC transporter	ko:K02029,ko:K10020	BPD_transp_1	-
contig_1036_np1212_2490	E	-	amino acid ABC transporter	ko:K02029	BPD_transp_1	-
contig_1036_np1212_2491	E	yhdZ	(ABC) transporter	ko:K02028,ko:K02029,ko:K09972	ABC_tran	GO:0000166,GO:0003674,GO:0005488,GO:0005524,GO:0008144,GO:0017076,GO:0030554,GO:0032553,GO:0032555,GO:0032559,GO:0035639,GO:0036094,GO:0043167,GO:0043168,GO:0097159,GO:0097367,GO:1901265,GO:1901363
contig_1036_np1212_2498	E	hisZ	Required for the first step of histidine biosynthesis. May allow the feedback regulation of ATP phosphoribosyltransferase activity by histidine	ko:K02502	tRNA-synt_His	-
contig_1036_np1212_2559	E	-	DegT/DnrJ/EryC1/StrS aminotransferase family	-	DegT_DnrJ_EryC1	-
contig_1036_np1212_2579	E	lysC	Belongs to the aspartokinase family	ko:K00928	AA_kinase,ACT,ACT_7	GO:0003674,GO:0003824,GO:0004072,GO:0006793,GO:0006796,GO:0008150,GO:0008152,GO:0009987,GO:0016301,GO:0016310,GO:0016740,GO:0016772,GO:0016774,GO:0019202,GO:0044237
contig_1036_np1212_2588	E	trpC	Belongs to the TrpC family	ko:K01609,ko:K13498	IGPS	-
contig_1036_np1212_2589	E	trpD	Catalyzes the transfer of the phosphoribosyl group of 5- phosphorylribose-1-pyrophosphate (PRPP) to anthranilate to yield N-(5'-phosphoribosyl)-anthranilate (PRA)	ko:K00766	Glycos_trans_3N,Glycos_transf_3	-
contig_1036_np1212_2591	E	soxG	Sarcosine oxidase, gamma subunit family	ko:K00305	SoxG	-
contig_1036_np1212_2592	E	-	Glycine cleavage T-protein C-terminal barrel domain	ko:K00302	Fer2_4,GCV_T,GCV_T_C,Pyr_redox_2	-
contig_1036_np1212_2593	E	soxD	Sarcosine oxidase, delta subunit	ko:K00304	SoxD	-
contig_1036_np1212_2594	E	-	Sarcosine oxidase, subunit beta	ko:K00303	DAO	-
contig_1036_np1212_2603	E	-	Orn/Lys/Arg decarboxylase, C-terminal domain	-	OKR_DC_1,OKR_DC_1_C,OKR_DC_1_N	-
contig_1036_np1212_2606	E	betA	Involved in the biosynthesis of the osmoprotectant glycine betaine. Catalyzes the oxidation of choline to betaine aldehyde and betaine aldehyde to glycine betaine at the same rate	ko:K00108	GMC_oxred_C,GMC_oxred_N	-
contig_1036_np1212_2607	E	-	Glycine betaine	ko:K02002	OpuAC	-
contig_1036_np1212_2609	E	-	ABC transporter	ko:K02000	ABC_tran	-
contig_1036_np1212_2617	E	dapC	Catalyzes the formation of succinyldiaminopimelate from N-succinyl-2-amino-6-ketopimelate	ko:K14267	Aminotran_1_2	-
contig_1036_np1212_2619	E	dapD	Catalyzes the conversion of the cyclic tetrahydrodipicolinate (THDP) into the acyclic N-succinyl-L-2- amino-6-oxopimelate using succinyl-CoA	ko:K00674	Hexapep_2,THDPS_M,THDPS_N	-
contig_1036_np1212_2620	E	dapE	Catalyzes the hydrolysis of N-succinyl-L,L- diaminopimelic acid (SDAP), forming succinate and LL-2,6- diaminoheptanedioate (DAP), an intermediate involved in the bacterial biosynthesis of lysine and meso-diaminopimelic acid, an essential component of bacterial cell walls	ko:K01439	M20_dimer,Peptidase_M20	GO:0003674,GO:0003824,GO:0006082,GO:0006520,GO:0006553,GO:0006807,GO:0008150,GO:0008152,GO:0008652,GO:0009014,GO:0009058,GO:0009066,GO:0009067,GO:0009085,GO:0009089,GO:0009987,GO:0016053,GO:0016787,GO:0016810,GO:0016811,GO:0019752,GO:0043436,GO:0043648,GO:0044237,GO:0044238,GO:0044249,GO:0044281,GO:0044283,GO:0046394,GO:0046451,GO:0071704,GO:1901564,GO:1901566,GO:1901576,GO:1901605,GO:1901607
contig_1036_np1212_2624	E	gltD	glutamate synthase	ko:K00266	Fer4_20,Pyr_redox_2	-
contig_1036_np1212_2625	E	gltB	Catalyzes the formation of glutamate from glutamine and alpha-ketoglutarate	ko:K00265	GATase_2,GXGXG,Glu_syn_central,Glu_synthase	-
contig_1036_np1212_2627	E	aroB	Catalyzes the conversion of 3-deoxy-D-arabino- heptulosonate 7-phosphate (DAHP) to dehydroquinate (DHQ)	ko:K01735	DHQ_synthase	-
contig_1036_np1212_2628	E	aroK	Catalyzes the specific phosphorylation of the 3-hydroxyl group of shikimic acid using ATP as a cosubstrate	ko:K00891	SKI	-
contig_1036_np1212_2642	E	-	Catalyzes the formation of L-homocysteine from O- succinyl-L-homoserine (OSHS) and hydrogen sulfide	-	Cys_Met_Meta_PP	-
contig_1036_np1212_2643	E	doeA	xaa-pro aminopeptidase	ko:K01271,ko:K15783	Creatinase_N,Peptidase_M24	GO:0003674,GO:0003824,GO:0005575,GO:0005622,GO:0005623,GO:0005737,GO:0006082,GO:0006807,GO:0008150,GO:0008152,GO:0009056,GO:0009987,GO:0016054,GO:0016787,GO:0016810,GO:0016812,GO:0019752,GO:0032787,GO:0042399,GO:0042400,GO:0043436,GO:0044237,GO:0044248,GO:0044281,GO:0044282,GO:0044424,GO:0044464,GO:0046395,GO:0046483,GO:0046700,GO:0071704,GO:0072329,GO:1901360,GO:1901361,GO:1901564,GO:1901565,GO:…
contig_1036_np1212_2691	E	map	Methionine aminopeptidase	ko:K01265	Peptidase_M24	-
contig_1036_np1212_2760	E	-	peptidase activity	ko:K01438	M20_dimer,Peptidase_M20	-
contig_1036_np1212_2761	E	-	ABC-type dipeptide transport system periplasmic component	ko:K02035	SBP_bac_5	-
contig_1036_np1212_2774	E	-	lysine exporter protein (LysE YggA)	-	LysE	-
contig_1036_np1212_2862	E	dat	Acts on the D-isomers of alanine, leucine, aspartate, glutamate, aminobutyrate, norvaline and asparagine. The enzyme transfers an amino group from a substrate D-amino acid to the pyridoxal phosphate cofactor to form pyridoxamine and an alpha- keto acid in the first half-reaction	ko:K00824	Aminotran_4	-
contig_1036_np1212_2871	E	proA	Catalyzes the NADPH-dependent reduction of L-glutamate 5-phosphate into L-glutamate 5-semialdehyde and phosphate. The product spontaneously undergoes cyclization to form 1-pyrroline-5- carboxylate	ko:K00147	Aldedh	GO:0003674,GO:0003824,GO:0004350,GO:0005488,GO:0005515,GO:0005575,GO:0005622,GO:0005623,GO:0005737,GO:0005829,GO:0006082,GO:0006520,GO:0006560,GO:0006561,GO:0006807,GO:0008150,GO:0008152,GO:0008652,GO:0009058,GO:0009064,GO:0009084,GO:0009987,GO:0016053,GO:0016491,GO:0016620,GO:0016903,GO:0017144,GO:0018130,GO:0019752,GO:0042802,GO:0043436,GO:0044237,GO:0044238,GO:0044249,GO:0044281,GO:0044283,GO:…
contig_1036_np1212_2883	E	thrC	Threonine synthase	ko:K01733	PALP,Thr_synth_N	-
contig_1036_np1212_2884	E	hom	homoserine dehydrogenase	ko:K00003	ACT,Homoserine_dh,NAD_binding_3	-
contig_1036_np1212_2897	E	-	ACT domain	-	ACT_6	-
contig_1036_np1212_2899	E	argH	argininosuccinate lyase	ko:K01755	ASL_C2,Lyase_1	-
contig_1036_np1212_2908	E	hisF	IGPS catalyzes the conversion of PRFAR and glutamine to IGP, AICAR and glutamate. The HisF subunit catalyzes the cyclization activity that produces IGP and AICAR from PRFAR using the ammonia provided by the HisH subunit	ko:K02500	His_biosynth	-
contig_1036_np1212_2909	E	hisH	IGPS catalyzes the conversion of PRFAR and glutamine to IGP, AICAR and glutamate. The HisH subunit provides the glutamine amidotransferase activity that produces the ammonia necessary to HisF for the synthesis of IGP and AICAR	ko:K02501	GATase	-
contig_1036_np1212_2910	E	hisB	Imidazoleglycerol-phosphate dehydratase	ko:K01693	IGPD	-
contig_1036_np1212_2915	E	-	Glutamate decarboxylase and related PLP-dependent	ko:K01580,ko:K13745	Pyridoxal_deC	-
contig_1036_np1212_2920	E	glmE	Catalyzes the carbon skeleton rearrangement of L- glutamate to L-threo-3-methylaspartate ((2S,3S)-3- methylaspartate)	ko:K19268	Met_asp_mut_E	-
contig_1036_np1212_2951	E	glyA	Catalyzes the reversible interconversion of serine and glycine with tetrahydrofolate (THF) serving as the one-carbon carrier. This reaction serves as the major source of one-carbon groups required for the biosynthesis of purines, thymidylate, methionine, and other important biomolecules. Also exhibits THF- independent aldolase activity toward beta-hydroxyamino acids, producing glycine and aldehyd…	ko:K00600	SHMT	GO:0001505,GO:0003674,GO:0003824,GO:0004372,GO:0005488,GO:0005515,GO:0005575,GO:0005622,GO:0005623,GO:0005737,GO:0005829,GO:0006082,GO:0006520,GO:0006544,GO:0006545,GO:0006546,GO:0006563,GO:0006565,GO:0006730,GO:0006807,GO:0008144,GO:0008150,GO:0008152,GO:0008270,GO:0008652,GO:0009056,GO:0009058,GO:0009063,GO:0009069,GO:0009070,GO:0009071,GO:0009987,GO:0016053,GO:0016054,GO:0016740,GO:0016741,GO:…
contig_1036_np1212_2971	E	-	COG0765 ABC-type amino acid transport system, permease component	ko:K09971	BPD_transp_1	-
contig_1036_np1212_2972	E	-	acid transport system permease	ko:K09970	BPD_transp_1	-
contig_1036_np1212_3025	E	-	Aminotransferase	ko:K14155	Aminotran_1_2	-
contig_1036_np1212_3040	E	dapB	Catalyzes the conversion of 4-hydroxy- tetrahydrodipicolinate (HTPA) to tetrahydrodipicolinate	ko:K00215	DapB_C,DapB_N	-
contig_1036_np1212_3041	E	cysE	serine acetyltransferase	ko:K00640	Hexapep,SATase_N	-
contig_1036_np1212_3069	E	-	phosphoserine phosphatase	-	HAD	-
contig_1036_np1212_3075	E	-	Belongs to the class-III pyridoxal-phosphate-dependent aminotransferase family	-	APH,Aminotran_3,Peptidase_M23	-
contig_1036_np1212_3114	E	-	Belongs to the UPF0758 family	ko:K03630	RadC	-
contig_1036_np1212_3162	E	-	LysE type translocator	-	LysE	-
contig_1036_np1212_3197	E	-	FAD binding domain	ko:K09471	DAO	-
contig_1036_np1212_3207	E	amaB_2	Peptidase dimerisation domain	ko:K06016	M20_dimer,Peptidase_M20,Peptidase_M28	-
contig_1036_np1212_3215	E	dapF	Catalyzes the stereoinversion of LL-2,6- diaminoheptanedioate (L,L-DAP) to meso-diaminoheptanedioate (meso- DAP), a precursor of L-lysine and an essential component of the bacterial peptidoglycan	ko:K01778	DAP_epimerase	-
contig_1036_np1212_3216	E	lysA	Specifically catalyzes the decarboxylation of meso- diaminopimelate (meso-DAP) to L-lysine	ko:K01586	Orn_Arg_deC_N,Orn_DAP_Arg_deC	-
contig_1036_np1212_3220	E	gmhB	D,D-heptose 1,7-bisphosphate phosphatase	ko:K03273	Hydrolase_like	-
contig_1036_np1212_3221	E	-	COG0578 Glycerol-3-phosphate dehydrogenase	-	DAO	-
contig_1036_np1212_3229	E	ilvE	Belongs to the class-IV pyridoxal-phosphate-dependent aminotransferase family	ko:K00826	Aminotran_4	-
contig_1036_np1212_3262	E	-	Arginase family	-	Arginase	-
contig_1036_np1212_3281	E	-	PFAM Glyoxalase bleomycin resistance protein dioxygenase	-	Glyoxalase	-
contig_1036_np1212_3285	E	-	COG0346 Lactoylglutathione lyase and related lyases	-	Glyoxalase	-
contig_1036_np1212_3294	E	aotP	COG4598 ABC-type histidine transport system, ATPase component	ko:K10025	ABC_tran	-
contig_1036_np1212_3296	E	-	Binding-protein-dependent transport system inner membrane component	-	BPD_transp_1	-
contig_1036_np1212_3298	E	-	FAD dependent oxidoreductase	-	DAO	-
contig_1036_np1212_3315	E	argA	Belongs to the acetyltransferase family. ArgA subfamily	ko:K14682	AA_kinase,Acetyltransf_1	GO:0003674,GO:0003824,GO:0004042,GO:0004358,GO:0006082,GO:0006520,GO:0006525,GO:0006526,GO:0006807,GO:0008080,GO:0008150,GO:0008152,GO:0008652,GO:0009058,GO:0009064,GO:0009084,GO:0009987,GO:0016053,GO:0016407,GO:0016410,GO:0016740,GO:0016746,GO:0016747,GO:0019752,GO:0043436,GO:0044237,GO:0044238,GO:0044249,GO:0044281,GO:0044283,GO:0046394,GO:0071704,GO:1901564,GO:1901566,GO:1901576,GO:1901605,GO:…
contig_1036_np1212_3343	E	prlC	Oligopeptidase	ko:K01414	Peptidase_M3	-
contig_1036_np1212_3366	E	ilvA	Catalyzes the anaerobic formation of alpha-ketobutyrate and ammonia from threonine in a two-step reaction. The first step involved a dehydration of threonine and a production of enamine intermediates (aminocrotonate), which tautomerizes to its imine form (iminobutyrate). Both intermediates are unstable and short- lived. The second step is the nonenzymatic hydrolysis of the enamine imine intermedi…	ko:K01754	PALP,Thr_dehydrat_C	-
contig_1036_np1212_3370	E	aroE	Involved in the biosynthesis of the chorismate, which leads to the biosynthesis of aromatic amino acids. Catalyzes the reversible NADPH linked reduction of 3-dehydroshikimate (DHSA) to yield shikimate (SA)	ko:K00014	Shikimate_DH,Shikimate_dh_N	-
contig_1036_np1212_3384	E	-	PFAM FAD dependent oxidoreductase	-	DAO	-
contig_1036_np1212_3484	E	hisA	1-(5-phosphoribosyl)-5- (5-phosphoribosylamino)methylideneamino imidazole-4-carboxamide isomerase	ko:K01814	His_biosynth	GO:0000105,GO:0000162,GO:0003674,GO:0003824,GO:0003949,GO:0005575,GO:0005622,GO:0005623,GO:0005737,GO:0006082,GO:0006520,GO:0006547,GO:0006568,GO:0006576,GO:0006586,GO:0006725,GO:0006807,GO:0008150,GO:0008152,GO:0008652,GO:0009058,GO:0009072,GO:0009073,GO:0009308,GO:0009309,GO:0009987,GO:0016053,GO:0016853,GO:0016860,GO:0016861,GO:0018130,GO:0019438,GO:0019752,GO:0034641,GO:0042401,GO:0042430,GO:…
contig_1036_np1212_3485	E	hisA2	1-(5-phosphoribosyl)-5-[(5-phosphoribosylamino)methylideneamino]imidazole-4-carboxamide isomerase activity	ko:K01814	His_biosynth	GO:0000105,GO:0003674,GO:0003824,GO:0003949,GO:0006082,GO:0006520,GO:0006547,GO:0006725,GO:0006807,GO:0008150,GO:0008152,GO:0008652,GO:0009058,GO:0009987,GO:0016053,GO:0016853,GO:0016860,GO:0016861,GO:0018130,GO:0019438,GO:0019752,GO:0034641,GO:0043436,GO:0044237,GO:0044238,GO:0044249,GO:0044281,GO:0044283,GO:0046394,GO:0046483,GO:0052803,GO:0071704,GO:1901360,GO:1901362,GO:1901564,GO:1901566,GO:…
contig_1036_np1212_3503	E	yjeH	PFAM amino acid permease-associated region	ko:K03757,ko:K03759,ko:K16263	AA_permease_2	GO:0000099,GO:0000101,GO:0000102,GO:0001101,GO:0003333,GO:0003674,GO:0005215,GO:0005294,GO:0005342,GO:0005575,GO:0005623,GO:0005886,GO:0005887,GO:0006810,GO:0006811,GO:0006812,GO:0006820,GO:0006855,GO:0006865,GO:0008150,GO:0008324,GO:0008509,GO:0008514,GO:0009719,GO:0009987,GO:0010033,GO:0010243,GO:0015075,GO:0015171,GO:0015175,GO:0015179,GO:0015191,GO:0015238,GO:0015291,GO:0015297,GO:0015318,GO:…
contig_1036_np1212_3515	E	cysZ	High affinity, high specificity proton-dependent sulfate transporter, which mediates sulfate uptake. Provides the sulfur source for the cysteine synthesis pathway	ko:K06203	EI24	-
contig_1036_np1212_3544	E	hisI	Catalyzes the hydrolysis of the adenine ring of phosphoribosyl-AMP	ko:K01496	PRA-CH	-
contig_1036_np1212_3545	E	hisE	Phosphoribosyl-ATP	ko:K01523	PRA-PH	-
contig_1036_np1212_3555	E	-	C-terminal region of peptidase_M24	ko:K01262	Creatinase_N,Creatinase_N_2,Peptidase_M24,Peptidase_M24_C	-
contig_1036_np1212_3560	E	-	COG4166 ABC-type oligopeptide transport system, periplasmic component	ko:K15580	SBP_bac_5	-
contig_1036_np1212_3566	E	-	Lysine exporter protein (LYSE YGGA)	-	LysE	-
contig_1036_np1212_3599	E	-	COG0421 Spermidine synthase	-	-	-
contig_1036_np1212_3600	E	-	dipeptide transport	ko:K02035	SBP_bac_5	-
contig_1036_np1212_3617	E	-	Branched-chain amino acid transport system / permease component	ko:K01997	BPD_transp_2	-
contig_1036_np1212_3618	E	-	ATPases associated with a variety of cellular activities	-	ABC_tran	-
contig_1036_np1212_3619	E	-	Receptor family ligand binding region	-	Peripla_BP_6	-
contig_1036_np1212_3620	E	-	Branched-chain amino acid ATP-binding cassette transporter	ko:K01995,ko:K01998	ABC_tran,BCA_ABC_TP_C,BPD_transp_2	-
contig_1036_np1212_3657	E	-	Creatinase/Prolidase N-terminal domain	ko:K08688	Creatinase_N,Peptidase_M24	-
contig_1036_np1212_3659	E	-	binding protein component of ABC transporter	ko:K02055	SBP_bac_8	-
contig_1036_np1212_3661	E	-	Binding-protein-dependent transport system inner membrane component	ko:K02053	BPD_transp_1	-
contig_1036_np1212_3670	E	-	LysE type translocator	-	LysE	-
contig_1036_np1212_3672	E	argF	ornithine carbamoyltransferase	ko:K00611	OTCace,OTCace_N	-
contig_1036_np1212_3681	E	-	Belongs to the class-III pyridoxal-phosphate-dependent aminotransferase family	ko:K00822	Aminotran_3	-
contig_1036_np1212_3687	E	proC	Catalyzes the reduction of 1-pyrroline-5-carboxylate (PCA) to L-proline	ko:K00286	F420_oxidored,P5CR_dimer	-
contig_1036_np1212_3699	E	proC	Catalyzes the reduction of 1-pyrroline-5-carboxylate (PCA) to L-proline	ko:K00286	F420_oxidored,P5CR_dimer	-
contig_1036_np1212_3712	E	-	COG1305 Transglutaminase-like enzymes	-	DUF3488,Transglut_core	-
contig_1036_np1212_3734	E	-	ABC-type branched-chain amino acid transport systems, periplasmic component	ko:K01999	Peripla_BP_6	-
contig_1036_np1212_3735	E	-	Belongs to the binding-protein-dependent transport system permease family	ko:K01998	BPD_transp_2	-
contig_1036_np1212_3736	E	-	Belongs to the binding-protein-dependent transport system permease family	ko:K01997,ko:K11956	BPD_transp_2	-
contig_1036_np1212_3737	E	-	amino acid ABC transporter	ko:K01996	ABC_tran	-
contig_1036_np1212_3738	E	-	Branched-chain amino acid ATP-binding cassette transporter	-	ABC_tran,BCA_ABC_TP_C	-
contig_1036_np1212_3740	E	-	Presumably involved in the processing and regular turnover of intracellular proteins. Catalyzes the removal of unsubstituted N-terminal amino acids from various peptides	ko:K07751	DUF3663,Peptidase_M17	-
contig_1036_np1212_3743	E	-	Bacterial extracellular solute-binding proteins, family 5 Middle	-	SBP_bac_5	-
contig_1036_np1212_3746	E	-	Proline racemase	ko:K01777	Pro_racemase	-
contig_1036_np1212_3747	E	-	Glycine D-amino acid oxidases (deaminating)	ko:K00285	DAO	-
contig_1036_np1212_3752	E	-	Homocysteine S-methyltransferase	ko:K00544	S-methyl_trans	-
contig_1036_np1212_3776	E	-	AzlC family	-	AzlC	-
contig_1036_np1212_3778	E	-	LysE type translocator	-	LysE	-
contig_1036_np1212_3783	E	tesA	COG2755 Lysophospholipase L1 and related esterases	ko:K10804	Lipase_GDSL_2	-
contig_1036_np1212_3799	E	-	Proline racemase	ko:K01777	Pro_racemase	-
contig_1036_np1212_3806	E	-	COG0346 Lactoylglutathione lyase and related lyases	-	Glyoxalase,Glyoxalase_4	-
contig_1036_np1212_3816	E	-	COG0346 Lactoylglutathione lyase and related lyases	-	Glyoxalase,Glyoxalase_4	-
contig_1036_np1212_3820	E	-	Saccharopine dehydrogenase NADP binding domain	-	Sacchrp_dh_NADP	-
contig_1036_np1212_3842	E	-	Oxidative deamination of D-amino acids	-	DAO	-
contig_1036_np1212_3864	E	ilvB-1	acetolactate synthase	ko:K01652	TPP_enzyme_C,TPP_enzyme_M,TPP_enzyme_N	-
contig_1036_np1212_3865	E	ilvH	acetolactate synthase	ko:K01653	ACT_5,ALS_ss_C	-
contig_1036_np1212_3870	E	eutB	Pyridoxal-phosphate dependent enzyme	ko:K01754	PALP	-
contig_1036_np1212_3872	E	thrC	Threonine synthase	ko:K01733	PALP,Thr_synth_N	GO:0003674,GO:0003824,GO:0004795,GO:0006082,GO:0006520,GO:0006566,GO:0006793,GO:0006796,GO:0006807,GO:0008150,GO:0008152,GO:0008652,GO:0009058,GO:0009066,GO:0009067,GO:0009088,GO:0009987,GO:0016053,GO:0016311,GO:0016829,GO:0016835,GO:0016838,GO:0019752,GO:0043436,GO:0044237,GO:0044238,GO:0044249,GO:0044281,GO:0044283,GO:0046394,GO:0071704,GO:1901564,GO:1901566,GO:1901576,GO:1901605,GO:1901607
contig_1036_np1212_3873	E	-	Ornithine cyclodeaminase/mu-crystallin family	ko:K01750	OCD_Mu_crystall	-
contig_1036_np1212_3888	E	-	ABC transporter substrate-binding protein	ko:K02035	SBP_bac_5	-
contig_1036_np1212_3889	E	-	ABC-type dipeptide transport system periplasmic component	ko:K02035	SBP_bac_5	-
contig_1036_np1212_3980	E	iscS	Master enzyme that delivers sulfur to a number of partners involved in Fe-S cluster assembly, tRNA modification or cofactor biosynthesis. Catalyzes the removal of elemental sulfur atoms from cysteine to produce alanine. Functions as a sulfur delivery protein for Fe-S cluster synthesis onto IscU, an Fe-S scaffold assembly protein, as well as other S acceptor proteins	ko:K04487	Aminotran_5	GO:0001522,GO:0003674,GO:0003824,GO:0004123,GO:0005488,GO:0005575,GO:0005622,GO:0005623,GO:0005737,GO:0005829,GO:0006139,GO:0006396,GO:0006399,GO:0006400,GO:0006725,GO:0006790,GO:0006807,GO:0008033,GO:0008144,GO:0008150,GO:0008152,GO:0008483,GO:0009000,GO:0009058,GO:0009451,GO:0009987,GO:0010467,GO:0016043,GO:0016070,GO:0016226,GO:0016740,GO:0016769,GO:0016782,GO:0016783,GO:0016829,GO:0016846,GO:…
contig_1036_np1212_4024	E	-	TOBE domain	ko:K02052	ABC_tran,TOBE_2	-
contig_1036_np1212_4025	E	-	ABC transporter substrate-binding protein	ko:K02055	SBP_bac_8	-
contig_1036_np1212_4026	E	-	Binding-protein-dependent transport system inner membrane component	ko:K02054	BPD_transp_1	-
contig_1036_np1212_4027	E	-	Binding-protein-dependent transport system inner membrane component	ko:K02053	BPD_transp_1	-
contig_1036_np1212_4034	E	-	Glyoxalase-like domain	-	Glyoxalase	-
contig_1036_np1212_4084	E	pepP	Belongs to the peptidase M24B family	ko:K01262	AMP_N,Peptidase_M24	-
contig_1036_np1212_4088	E	-	D-aminopeptidase	-	Peptidase_M55	-
contig_1036_np1212_4093	E	mdeA	COG0626 Cystathionine beta-lyases cystathionine gamma-synthases	ko:K01739,ko:K01761	Cys_Met_Meta_PP	-
contig_1036_np1212_4098	E	-	Cys/Met metabolism PLP-dependent enzyme	-	Aminotran_5	-
contig_1036_np1212_4140	E	-	Lysine exporter protein (LYSE YGGA)	ko:K05834	LysE	-
contig_1036_np1212_1142	EF	-	Pyrophosphokinase	ko:K00948	Pribosyltran,Pribosyltran_N	-
contig_1036_np1212_1519	EF	-	Ribose-phosphate pyrophosphokinase	ko:K00948	Pribosyl_synth,Pribosyltran,Pribosyltran_N	-
contig_1036_np1212_265	EG	edd	Belongs to the IlvD Edd family	ko:K01690	ILVD_EDD	GO:0003674,GO:0003824,GO:0004456,GO:0005975,GO:0006082,GO:0008150,GO:0008152,GO:0009056,GO:0009987,GO:0016052,GO:0016054,GO:0016829,GO:0016835,GO:0016836,GO:0019520,GO:0019521,GO:0019752,GO:0032787,GO:0043436,GO:0044237,GO:0044238,GO:0044248,GO:0044262,GO:0044275,GO:0044281,GO:0044282,GO:0046176,GO:0046177,GO:0046395,GO:0071704,GO:0072329,GO:1901575
contig_1036_np1212_586	EG	-	of the drug metabolite transporter (DMT) superfamily	-	EamA	-
contig_1036_np1212_757	EG	-	COG0697 Permeases of the drug metabolite transporter (DMT) superfamily	-	EamA	-
contig_1036_np1212_960	EG	-	COG0697 Permeases of the drug metabolite transporter (DMT) superfamily	-	EamA	-
contig_1036_np1212_993	EG	pecM	EamA-like transporter family	ko:K15269	EamA	GO:0005575,GO:0005623,GO:0005886,GO:0016020,GO:0044464,GO:0071944
contig_1036_np1212_1104	EG	-	of the drug metabolite transporter (DMT) superfamily	-	EamA	-
contig_1036_np1212_1290	EG	-	EamA-like transporter family	-	EamA	-
contig_1036_np1212_1339	EG	-	EamA-like transporter family	-	EamA	-
contig_1036_np1212_1341	EG	-	EamA-like transporter family	-	EamA	-
contig_1036_np1212_2188	EG	-	EamA-like transporter family	-	EamA	-
contig_1036_np1212_2362	EG	-	EamA-like transporter family	ko:K03298,ko:K15268	EamA	-
contig_1036_np1212_2372	EG	-	COG0697 Permeases of the drug metabolite transporter (DMT) superfamily	-	EamA	-
contig_1036_np1212_2389	EG	ilvD1	Belongs to the IlvD Edd family	ko:K22186,ko:K22216	ILVD_EDD	-
contig_1036_np1212_2390	EG	ilvD1	Belongs to the IlvD Edd family	ko:K22186,ko:K22216	ILVD_EDD	-
contig_1036_np1212_2916	EG	MA20_35690	EamA-like transporter family	-	EamA	-
contig_1036_np1212_3196	EG	-	permeases of the drug metabolite transporter (DMT) superfamily	-	EamA	-
contig_1036_np1212_3322	EG	ilvD	Belongs to the IlvD Edd family	ko:K01687	ILVD_EDD	-
contig_1036_np1212_3641	EG	-	EamA-like transporter family	-	EamA	-
contig_1036_np1212_4112	EG	-	EamA-like transporter family	-	EamA	-
contig_1036_np1212_565	EGP	sflR	TIGRFAM drug resistance transporter, Bcr CflA subfamily	ko:K07552,ko:K18552	MFS_1	-
contig_1036_np1212_615	EGP	-	Major Facilitator Superfamily	-	MFS_1	-
contig_1036_np1212_719	EGP	-	Major Facilitator Superfamily	-	MFS_1,Sugar_tr	-
contig_1036_np1212_1288	EGP	-	Major facilitator superfamily	-	MFS_1	-
contig_1036_np1212_3185	EGP	-	Sugar (and other) transporter	ko:K07552	MFS_1	-
contig_1036_np1212_3552	EGP	tetA	Major facilitator superfamily	ko:K08151	MFS_1,Sugar_tr	-
contig_1036_np1212_3971	EGP	-	Major facilitator superfamily	ko:K07552	MFS_1	-
contig_1036_np1212_4048	EGP	-	Major facilitator superfamily	-	MFS_1	-
contig_1036_np1212_142	EH	-	Belongs to the TPP enzyme family	ko:K03852	TPP_enzyme_C,TPP_enzyme_M,TPP_enzyme_N	-
contig_1036_np1212_444	EH	ilvC	Involved in the biosynthesis of branched-chain amino acids (BCAA). Catalyzes an alkyl-migration followed by a ketol- acid reduction of (S)-2-acetolactate (S2AL) to yield (R)-2,3- dihydroxy-isovalerate. In the isomerase reaction, S2AL is rearranged via a Mg-dependent methyl migration to produce 3- hydroxy-3-methyl-2-ketobutyrate (HMKB). In the reductase reaction, this 2-ketoacid undergoes a metal-…	ko:K00053	IlvC,IlvN	-
contig_1036_np1212_1068	EH	pabC	Branched-chain amino acid aminotransferase 4-amino-4-deoxychorismate lyase	ko:K02619	Aminotran_4	-
contig_1036_np1212_1701	EH	pabB	COG0147 Anthranilate para-aminobenzoate synthases component I	ko:K01665	Anth_synt_I_N,Chorismate_bind	-
contig_1036_np1212_2011	EH	-	Amino-transferase class IV	ko:K00824	Aminotran_4	-
contig_1036_np1212_2144	EH	cysH	Belongs to the PAPS reductase family. CysH subfamily	ko:K00390	PAPS_reduct	-
contig_1036_np1212_2590	EH	pabA	COG0512 Anthranilate para-aminobenzoate synthases component II	ko:K01658,ko:K01664	GATase	GO:0000162,GO:0003674,GO:0003824,GO:0005575,GO:0005622,GO:0005623,GO:0005737,GO:0005950,GO:0006082,GO:0006520,GO:0006568,GO:0006575,GO:0006576,GO:0006586,GO:0006725,GO:0006732,GO:0006760,GO:0006807,GO:0008150,GO:0008152,GO:0008483,GO:0008652,GO:0009058,GO:0009072,GO:0009073,GO:0009108,GO:0009308,GO:0009309,GO:0009396,GO:0009987,GO:0016053,GO:0016740,GO:0016769,GO:0018130,GO:0019438,GO:0019752,GO:…
contig_1036_np1212_3171	EH	-	D-isomer specific 2-hydroxyacid dehydrogenase	ko:K00058	2-Hacid_dh,2-Hacid_dh_C	-
contig_1036_np1212_3247	EH	serA	Belongs to the D-isomer specific 2-hydroxyacid dehydrogenase family	ko:K00058	2-Hacid_dh,2-Hacid_dh_C,ACT	GO:0003674,GO:0003824,GO:0004617,GO:0005488,GO:0005515,GO:0005575,GO:0005622,GO:0005623,GO:0005737,GO:0005829,GO:0006082,GO:0006520,GO:0006563,GO:0006564,GO:0006807,GO:0008150,GO:0008152,GO:0008219,GO:0008652,GO:0009058,GO:0009069,GO:0009070,GO:0009987,GO:0012501,GO:0016053,GO:0016491,GO:0016597,GO:0016614,GO:0016616,GO:0019752,GO:0031406,GO:0036094,GO:0042802,GO:0043167,GO:0043168,GO:0043169,GO:…
contig_1036_np1212_3308	EH	-	D-isomer specific 2-hydroxyacid dehydrogenase	ko:K12972	2-Hacid_dh_C	-
contig_1036_np1212_3801	EH	trpG	TIGRFAM glutamine amidotransferase of anthranilate synthase	ko:K01658,ko:K01664	GATase	GO:0000162,GO:0005575,GO:0005622,GO:0005623,GO:0005737,GO:0005950,GO:0006082,GO:0006520,GO:0006568,GO:0006576,GO:0006586,GO:0006725,GO:0006807,GO:0008150,GO:0008152,GO:0008652,GO:0009058,GO:0009072,GO:0009073,GO:0009308,GO:0009309,GO:0009987,GO:0016053,GO:0018130,GO:0019438,GO:0019752,GO:0032991,GO:0034641,GO:0042401,GO:0042430,GO:0042435,GO:0043436,GO:0044106,GO:0044237,GO:0044238,GO:0044249,GO:…
contig_1036_np1212_3802	EH	trpE	Part of a heterotetrameric complex that catalyzes the two-step biosynthesis of anthranilate, an intermediate in the biosynthesis of L-tryptophan. In the first step, the glutamine- binding beta subunit (TrpG) of anthranilate synthase (AS) provides the glutamine amidotransferase activity which generates ammonia as a substrate that, along with chorismate, is used in the second step, catalyzed by the…	ko:K01657	Anth_synt_I_N,Chorismate_bind	-
contig_1036_np1212_4074	EJ	ansA	PFAM Asparaginase glutaminase	ko:K01424	Asparaginase	-
contig_1036_np1212_141	EK	-	helix_turn_helix gluconate operon transcriptional repressor	ko:K00375	Aminotran_1_2,GntR	-
contig_1036_np1212_4029	EK	-	helix_turn_helix gluconate operon transcriptional repressor	ko:K00375,ko:K05825	Aminotran_1_2,GntR	-
contig_1036_np1212_1936	EM	nanA	Neu5Ac) to form pyruvate and N-acetylmannosamine (ManNAc) via a Schiff base intermediate	ko:K01639	DHDPS	-
contig_1036_np1212_2795	EM	MA20_21525	Belongs to the DapA family	ko:K13876	DHDPS	-
contig_1036_np1212_3749	EM	dapA_1	dihydrodipicolinate synthetase	ko:K01714	DHDPS	-
contig_1036_np1212_3904	EM	-	Dihydrodipicolinate synthetase family	ko:K01707	DHDPS	-
contig_1036_np1212_359	EP	oppB	Binding-protein-dependent transport system inner membrane component	ko:K15581	BPD_transp_1	-
contig_1036_np1212_906	EP	dppC	ABC-type dipeptide oligopeptide nickel transport systems, permease components	ko:K02034,ko:K12370	BPD_transp_1,OppC_N	GO:0005575,GO:0005623,GO:0005886,GO:0016020,GO:0044464,GO:0071944
contig_1036_np1212_1304	EP	dppFch3	PFAM ABC transporter	ko:K02032	ABC_tran	-
contig_1036_np1212_1305	EP	-	ATPases associated with a variety of cellular activities	ko:K02031	ABC_tran,oligo_HPY	-
contig_1036_np1212_1306	EP	ddpC	ABC-type dipeptide oligopeptide nickel transport systems, permease components	ko:K02034	BPD_transp_1,OppC_N	GO:0005575,GO:0005623,GO:0005886,GO:0005887,GO:0016020,GO:0016021,GO:0031224,GO:0031226,GO:0044425,GO:0044459,GO:0044464,GO:0071944
contig_1036_np1212_1307	EP	-	Binding-protein-dependent transport system inner membrane component	ko:K02033	BPD_transp_1	-
contig_1036_np1212_1957	EP	-	COG1173 ABC-type dipeptide oligopeptide nickel transport systems permease components	ko:K02034	BPD_transp_1,OppC_N	-
contig_1036_np1212_2762	EP	-	Binding-protein-dependent transport system inner membrane component	-	BPD_transp_1	-
contig_1036_np1212_2763	EP	-	COG1173 ABC-type dipeptide oligopeptide nickel transport systems permease components	ko:K02034	BPD_transp_1,OppC_N	-
contig_1036_np1212_3741	EP	-	N-terminal TM domain of oligopeptide transport permease C	ko:K02034,ko:K15582	BPD_transp_1,OppC_N	-
contig_1036_np1212_3884	EP	-	ABC transporter	ko:K02032	ABC_tran	-
contig_1036_np1212_3885	EP	dppDch3	ABC transporter	ko:K02031	ABC_tran	-
contig_1036_np1212_3886	EP	dppC	ABC-type dipeptide oligopeptide nickel transport systems, permease components	ko:K02034	BPD_transp_1,OppC_N	-
contig_1036_np1212_763	EQ	-	Hydantoinase/oxoprolinase N-terminal region	-	Hydant_A_N,Hydantoinase_A	-
contig_1036_np1212_2895	EQ	-	Peptidase family S58	ko:K01266	Peptidase_S58	-
contig_1036_np1212_124	ET	bztA	PFAM Bacterial extracellular solute-binding proteins, family 3	ko:K09969	SBP_bac_3	GO:0005575,GO:0005623,GO:0042597,GO:0044464
contig_1036_np1212_606	ET	-	COG0834 ABC-type amino acid transport signal transduction systems periplasmic component domain	-	SBP_bac_3	-
contig_1036_np1212_607	ET	-	COG0834 ABC-type amino acid transport signal transduction systems periplasmic component domain	-	SBP_bac_3	-
contig_1036_np1212_1253	ET	occT	Ligated ion channel L-glutamate- and glycine-binding site	ko:K10018	SBP_bac_3	-
contig_1036_np1212_1579	ET	-	belongs to the bacterial solute-binding protein 3 family	ko:K10014,ko:K10022	SBP_bac_3	-
contig_1036_np1212_1595	ET	-	ABC-type amino acid transport signal transduction systems periplasmic component domain	ko:K02030	SBP_bac_3	-
contig_1036_np1212_1702	ET	bztA	COG0834 ABC-type amino acid transport signal transduction systems periplasmic component domain	ko:K09969	SBP_bac_3	GO:0005575,GO:0005623,GO:0042597,GO:0044464
contig_1036_np1212_2488	ET	-	amino acid transport	ko:K02030	SBP_bac_3	-
contig_1036_np1212_2735	ET	-	Bacterial extracellular solute-binding proteins, family 3	-	SBP_bac_3	-
contig_1036_np1212_2893	ET	-	ABC-type amino acid transport signal transduction systems periplasmic component domain	ko:K02030	SBP_bac_3	-
contig_1036_np1212_2973	ET	-	general L-amino acid-binding periplasmic protein AapJ	ko:K09969	SBP_bac_3	-
contig_1036_np1212_3295	ET	-	Belongs to the bacterial solute-binding protein 3 family	ko:K10022	SBP_bac_3	-
contig_1036_np1212_3390	ET	-	Bacterial extracellular solute-binding proteins, family 3	ko:K02030	SBP_bac_3	-
contig_1036_np1212_3637	ET	-	ABC-type amino acid transport signal transduction systems periplasmic component domain	-	-	-
contig_1036_np1212_4092	ET	-	Diguanylate cyclase	-	GGDEF,NMT1,SBP_bac_3	-
contig_1036_np1212_26	F	pyrC-2	Dihydroorotase multifunctional complex type	ko:K01465	Amidohydro_1	-
contig_1036_np1212_27	F	pyrB	Belongs to the ATCase OTCase family	ko:K00609	OTCace,OTCace_N	-
contig_1036_np1212_28	F	-	Phosphoribosyl transferase domain	ko:K02825	Pribosyltran	-
contig_1036_np1212_38	F	pgk	Belongs to the phosphoglycerate kinase family	ko:K00927	PGK	-
contig_1036_np1212_254	F	upp	Catalyzes the conversion of uracil and 5-phospho-alpha- D-ribose 1-diphosphate (PRPP) to UMP and diphosphate	ko:K00761	UPRTase	GO:0003674,GO:0003824,GO:0004845,GO:0004849,GO:0005488,GO:0005515,GO:0005575,GO:0005622,GO:0005623,GO:0005737,GO:0005829,GO:0006139,GO:0006206,GO:0006213,GO:0006220,GO:0006221,GO:0006222,GO:0006725,GO:0006753,GO:0006793,GO:0006796,GO:0006807,GO:0008150,GO:0008152,GO:0008655,GO:0009058,GO:0009112,GO:0009116,GO:0009117,GO:0009119,GO:0009123,GO:0009124,GO:0009129,GO:0009130,GO:0009156,GO:0009161,GO:…
contig_1036_np1212_266	F	glk	Belongs to the bacterial glucokinase family	ko:K00845	Glucokinase	-
contig_1036_np1212_343	F	dut	This enzyme is involved in nucleotide metabolism it produces dUMP, the immediate precursor of thymidine nucleotides and it decreases the intracellular concentration of dUTP so that uracil cannot be incorporated into DNA	ko:K01520	dUTPase	-
contig_1036_np1212_351	F	pyrC	Catalyzes the reversible cyclization of carbamoyl aspartate to dihydroorotate	ko:K01465	Amidohydro_1	-
contig_1036_np1212_400	F	dgt	Deoxyguanosinetriphosphate triphosphohydrolase-like protein	ko:K01129	HD,HD_assoc	-
contig_1036_np1212_473	F	cmk	Belongs to the cytidylate kinase family. Type 1 subfamily	ko:K00945	Cytidylate_kin	-
contig_1036_np1212_477	F	pyrF	Catalyzes the decarboxylation of orotidine 5'- monophosphate (OMP) to uridine 5'-monophosphate (UMP)	ko:K01591	OMPdecase	-
contig_1036_np1212_642	F	-	glutamine amidotransferase	ko:K01951	GATase	-
contig_1036_np1212_714	F	pyrD	Catalyzes the conversion of dihydroorotate to orotate with quinone as electron acceptor	ko:K00254	DHO_dh	GO:0000166,GO:0003674,GO:0003824,GO:0004152,GO:0004158,GO:0005488,GO:0005575,GO:0005622,GO:0005623,GO:0005737,GO:0005829,GO:0005886,GO:0006139,GO:0006206,GO:0006207,GO:0006220,GO:0006221,GO:0006725,GO:0006753,GO:0006793,GO:0006796,GO:0006807,GO:0008150,GO:0008152,GO:0009058,GO:0009112,GO:0009117,GO:0009165,GO:0009218,GO:0009220,GO:0009259,GO:0009260,GO:0009987,GO:0010181,GO:0016020,GO:0016491,GO:…
contig_1036_np1212_715	F	pyrD	Catalyzes the conversion of dihydroorotate to orotate with quinone as electron acceptor	ko:K00254	DHO_dh	-
contig_1036_np1212_758	F	apt	Catalyzes a salvage reaction resulting in the formation of AMP, that is energically less costly than de novo synthesis	ko:K00759	Pribosyltran	-
contig_1036_np1212_956	F	-	Guanine deaminase	ko:K01487	Amidohydro_1	-
contig_1036_np1212_958	F	xdhB	COG4631 Xanthine dehydrogenase, molybdopterin-binding subunit B	ko:K13482	Ald_Xan_dh_C,Ald_Xan_dh_C2	-
contig_1036_np1212_959	F	xdhA	Xanthine dehydrogenase, iron-sulfur cluster and FAD-binding subunit A	ko:K13481	CO_deh_flav_C,FAD_binding_5,Fer2,Fer2_2	-
contig_1036_np1212_965	F	fhs	formate-tetrahydrofolate ligase activity	ko:K01938	FTHFS	-
contig_1036_np1212_1070	F	tmk	Phosphorylation of dTMP to form dTDP in both de novo and salvage pathways of dTTP synthesis	ko:K00943	Thymidylate_kin	GO:0003674,GO:0003824,GO:0004798,GO:0005575,GO:0005622,GO:0005623,GO:0005737,GO:0005829,GO:0006139,GO:0006220,GO:0006221,GO:0006227,GO:0006233,GO:0006235,GO:0006725,GO:0006753,GO:0006793,GO:0006796,GO:0006807,GO:0008150,GO:0008152,GO:0009041,GO:0009058,GO:0009117,GO:0009123,GO:0009132,GO:0009133,GO:0009138,GO:0009139,GO:0009141,GO:0009142,GO:0009147,GO:0009148,GO:0009165,GO:0009186,GO:0009189,GO:…
contig_1036_np1212_1120	F	queC	Catalyzes the ATP-dependent conversion of 7-carboxy-7- deazaguanine (CDG) to 7-cyano-7-deazaguanine (preQ(0))	ko:K06920	QueC	-
contig_1036_np1212_1139	F	-	cytidine deaminase activity	ko:K01489	-	-
contig_1036_np1212_1187	F	ddl	Belongs to the D-alanine--D-alanine ligase family	ko:K01921	Dala_Dala_lig_C,Dala_Dala_lig_N	-
contig_1036_np1212_1256	F	purB	Belongs to the lyase 1 family. Adenylosuccinate lyase subfamily	ko:K01756	ASL_C,Lyase_1	-
contig_1036_np1212_1261	F	-	phosphoribosyltransferase	ko:K07101	Pribosyltran	-
contig_1036_np1212_1365	F	hpt	Belongs to the purine pyrimidine phosphoribosyltransferase family	ko:K00760	Pribosyltran	-
contig_1036_np1212_1367	F	purF	Catalyzes the formation of phosphoribosylamine from phosphoribosylpyrophosphate (PRPP) and glutamine	ko:K00764	GATase_6,Pribosyltran	-
contig_1036_np1212_1435	F	dcd	Belongs to the dCTP deaminase family	ko:K01494	dUTPase	-
contig_1036_np1212_1488	F	purM	Phosphoribosylformylglycinamidine cyclo-ligase	ko:K01933	AIRS,AIRS_C	-
contig_1036_np1212_1489	F	purN	Catalyzes the transfer of a formyl group from 10- formyltetrahydrofolate to 5-phospho-ribosyl-glycinamide (GAR), producing 5-phospho-ribosyl-N-formylglycinamide (FGAR) and tetrahydrofolate	ko:K11175	Formyl_trans_N	-
contig_1036_np1212_1520	F	-	COG1051 ADP-ribose pyrophosphatase	-	-	-
contig_1036_np1212_1522	F	folD	Catalyzes the oxidation of 5,10- methylenetetrahydrofolate to 5,10-methenyltetrahydrofolate and then the hydrolysis of 5,10-methenyltetrahydrofolate to 10- formyltetrahydrofolate	ko:K01491	THF_DHG_CYH,THF_DHG_CYH_C	-
contig_1036_np1212_1537	F	-	Xanthine uracil	ko:K03458	Xan_ur_permease	-
contig_1036_np1212_1541	F	alc	Belongs to the allantoicase family	ko:K01477	Allantoicase	GO:0003674,GO:0003824,GO:0004037,GO:0006139,GO:0006144,GO:0006145,GO:0006725,GO:0006807,GO:0008150,GO:0008152,GO:0009056,GO:0009112,GO:0009987,GO:0016787,GO:0016810,GO:0016813,GO:0019439,GO:0034641,GO:0044237,GO:0044238,GO:0044248,GO:0044270,GO:0044281,GO:0046113,GO:0046483,GO:0046700,GO:0055086,GO:0071704,GO:0072521,GO:0072523,GO:1901360,GO:1901361,GO:1901564,GO:1901565,GO:1901575
contig_1036_np1212_1542	F	allA	Catalyzes the catabolism of the allantoin degradation intermediate (S)-ureidoglycolate, generating urea and glyoxylate. Involved in the utilization of allantoin as nitrogen source	ko:K01483	Ureidogly_lyase	-
contig_1036_np1212_1556	F	hutF	Amidohydrolase family	ko:K05603	Amidohydro_1	-
contig_1036_np1212_1680	F	dgt	dGTPase preferentially hydrolyzes dGTP over the other canonical NTPs	ko:K01129	HD,HD_assoc	GO:0003674,GO:0003676,GO:0003677,GO:0003697,GO:0003824,GO:0003924,GO:0005488,GO:0005515,GO:0006139,GO:0006163,GO:0006195,GO:0006203,GO:0006725,GO:0006753,GO:0006793,GO:0006796,GO:0006807,GO:0008150,GO:0008152,GO:0008832,GO:0009056,GO:0009058,GO:0009117,GO:0009141,GO:0009143,GO:0009144,GO:0009146,GO:0009151,GO:0009155,GO:0009166,GO:0009200,GO:0009204,GO:0009215,GO:0009217,GO:0009262,GO:0009264,GO:…
contig_1036_np1212_1703	F	udk	Cytidine monophosphokinase	ko:K00876	PRK	GO:0003674,GO:0003824,GO:0004849,GO:0005575,GO:0005622,GO:0005623,GO:0005737,GO:0005829,GO:0006139,GO:0006206,GO:0006213,GO:0006220,GO:0006221,GO:0006222,GO:0006725,GO:0006753,GO:0006793,GO:0006796,GO:0006807,GO:0008150,GO:0008152,GO:0008655,GO:0009058,GO:0009112,GO:0009116,GO:0009117,GO:0009119,GO:0009123,GO:0009124,GO:0009129,GO:0009130,GO:0009156,GO:0009161,GO:0009163,GO:0009165,GO:0009173,GO:…
contig_1036_np1212_1784	F	cobT	Catalyzes the synthesis of alpha-ribazole-5'-phosphate from nicotinate mononucleotide (NAMN) and 5,6- dimethylbenzimidazole (DMB)	ko:K00768	DBI_PRT	GO:0003674,GO:0003824,GO:0006725,GO:0006766,GO:0006767,GO:0006807,GO:0008150,GO:0008152,GO:0008939,GO:0009058,GO:0009110,GO:0009235,GO:0009236,GO:0009987,GO:0016740,GO:0016757,GO:0016763,GO:0017144,GO:0018130,GO:0019438,GO:0033013,GO:0033014,GO:0034641,GO:0042364,GO:0044237,GO:0044249,GO:0044271,GO:0044281,GO:0044283,GO:0046483,GO:0051186,GO:0051188,GO:0071704,GO:1901360,GO:1901362,GO:1901564,GO:…
contig_1036_np1212_1814	F	adk	Catalyzes the reversible transfer of the terminal phosphate group between ATP and AMP. Plays an important role in cellular energy homeostasis and in adenine nucleotide metabolism	ko:K00939	ADK,ADK_lid	-
contig_1036_np1212_1981	F	purH	Bifunctional purine biosynthesis protein PurH	ko:K00602	AICARFT_IMPCHas,MGS	-
contig_1036_np1212_1982	F	purD	Belongs to the GARS family	ko:K01945,ko:K13713	GARS_A,GARS_C,GARS_N	GO:0000166,GO:0003674,GO:0003824,GO:0004637,GO:0005488,GO:0005524,GO:0006139,GO:0006163,GO:0006164,GO:0006725,GO:0006753,GO:0006793,GO:0006796,GO:0006807,GO:0006950,GO:0006974,GO:0008144,GO:0008150,GO:0008152,GO:0009058,GO:0009117,GO:0009150,GO:0009152,GO:0009165,GO:0009259,GO:0009260,GO:0009987,GO:0016462,GO:0016787,GO:0016817,GO:0016818,GO:0016874,GO:0016879,GO:0016887,GO:0017076,GO:0017111,GO:…
contig_1036_np1212_1999	F	-	COG0563 Adenylate kinase and related kinases	-	-	-
contig_1036_np1212_2159	F	-	forms a homodimer and then a multimeric complex with NrdA	ko:K00526	Ribonuc_red_sm	-
contig_1036_np1212_2160	F	nrdA	Provides the precursors necessary for DNA synthesis. Catalyzes the biosynthesis of deoxyribonucleotides from the corresponding ribonucleotides	ko:K00525	ATP-cone,Ribonuc_red_lgC,Ribonuc_red_lgN	-
contig_1036_np1212_2239	F	-	Belongs to the IUNH family	-	IU_nuc_hydro	-
contig_1036_np1212_2315	F	carB	Carbamoyl-phosphate synthetase ammonia chain	ko:K01955	CPSase_L_D2,CPSase_L_D3,MGS	-
contig_1036_np1212_2316	F	carA	Carbamoyl-phosphate synthetase glutamine chain	ko:K01956	CPSase_sm_chain,GATase	GO:0000050,GO:0003674,GO:0003824,GO:0004088,GO:0005575,GO:0005622,GO:0005623,GO:0005737,GO:0005829,GO:0005951,GO:0006082,GO:0006139,GO:0006206,GO:0006207,GO:0006220,GO:0006221,GO:0006520,GO:0006525,GO:0006526,GO:0006541,GO:0006725,GO:0006753,GO:0006793,GO:0006796,GO:0006807,GO:0008150,GO:0008152,GO:0008652,GO:0009058,GO:0009064,GO:0009084,GO:0009112,GO:0009117,GO:0009165,GO:0009218,GO:0009220,GO:…
contig_1036_np1212_2442	F	purC	Belongs to the SAICAR synthetase family	ko:K01923	SAICAR_synt	GO:0003674,GO:0003824,GO:0004639,GO:0005575,GO:0005622,GO:0005623,GO:0005737,GO:0005829,GO:0006139,GO:0006163,GO:0006164,GO:0006188,GO:0006189,GO:0006725,GO:0006753,GO:0006793,GO:0006796,GO:0006807,GO:0008150,GO:0008152,GO:0009058,GO:0009117,GO:0009123,GO:0009124,GO:0009126,GO:0009127,GO:0009150,GO:0009152,GO:0009156,GO:0009161,GO:0009165,GO:0009167,GO:0009168,GO:0009259,GO:0009260,GO:0009987,GO:…
contig_1036_np1212_2497	F	purA	Plays an important role in the de novo pathway of purine nucleotide biosynthesis. Catalyzes the first committed step in the biosynthesis of AMP from IMP	ko:K01939	Adenylsucc_synt	-
contig_1036_np1212_2519	F	purL	Phosphoribosylformylglycinamidine synthase involved in the purines biosynthetic pathway. Catalyzes the ATP-dependent conversion of formylglycinamide ribonucleotide (FGAR) and glutamine to yield formylglycinamidine ribonucleotide (FGAM) and glutamate	ko:K01952	AIRS_C,GATase_5	GO:0000166,GO:0003674,GO:0003824,GO:0004642,GO:0005488,GO:0005524,GO:0005575,GO:0005622,GO:0005623,GO:0005737,GO:0005829,GO:0006082,GO:0006139,GO:0006163,GO:0006164,GO:0006188,GO:0006189,GO:0006520,GO:0006541,GO:0006725,GO:0006753,GO:0006793,GO:0006796,GO:0006807,GO:0008144,GO:0008150,GO:0008152,GO:0009058,GO:0009064,GO:0009117,GO:0009123,GO:0009124,GO:0009126,GO:0009127,GO:0009150,GO:0009152,GO:…
contig_1036_np1212_2522	F	guaA	Catalyzes the synthesis of GMP from XMP	ko:K01951	GATase,GMP_synt_C,NAD_synthase	-
contig_1036_np1212_2523	F	guaB	Catalyzes the conversion of inosine 5'-phosphate (IMP) to xanthosine 5'-phosphate (XMP), the first committed and rate- limiting step in the de novo synthesis of guanine nucleotides, and therefore plays an important role in the regulation of cell growth	ko:K00088	CBS,IMPDH,NMO	-
contig_1036_np1212_2674	F	pyrG	Catalyzes the ATP-dependent amination of UTP to CTP with either L-glutamine or ammonia as the source of nitrogen. Regulates intracellular CTP levels through interactions with the four ribonucleotide triphosphates	ko:K01937	CTP_synth_N,GATase	-
contig_1036_np1212_2688	F	pyrH	Catalyzes the reversible phosphorylation of UMP to UDP	ko:K09903	AA_kinase	-
contig_1036_np1212_3064	F	thyA	Catalyzes the reductive methylation of 2'-deoxyuridine- 5'-monophosphate (dUMP) to 2'-deoxythymidine-5'-monophosphate (dTMP) while utilizing 5,10-methylenetetrahydrofolate (mTHF) as the methyl donor and reductant in the reaction, yielding dihydrofolate (DHF) as a by-product. This enzymatic reaction provides an intracellular de novo source of dTMP, an essential precursor for DNA biosynthesis	ko:K00560	Thymidylat_synt	GO:0003674,GO:0003824,GO:0004799,GO:0006139,GO:0006725,GO:0006753,GO:0006793,GO:0006796,GO:0006807,GO:0008150,GO:0008152,GO:0008168,GO:0009058,GO:0009117,GO:0009165,GO:0009262,GO:0009263,GO:0009265,GO:0009394,GO:0009987,GO:0016740,GO:0016741,GO:0018130,GO:0019438,GO:0019637,GO:0019692,GO:0032259,GO:0034641,GO:0034654,GO:0042083,GO:0044237,GO:0044238,GO:0044249,GO:0044271,GO:0044281,GO:0046385,GO:…
contig_1036_np1212_3102	F	pyrE	Catalyzes the transfer of a ribosyl phosphate group from 5-phosphoribose 1-diphosphate to orotate, leading to the formation of orotidine monophosphate (OMP)	ko:K00762	Pribosyltran	GO:0000287,GO:0003674,GO:0003824,GO:0004588,GO:0005488,GO:0005575,GO:0005622,GO:0005623,GO:0005737,GO:0005829,GO:0006139,GO:0006206,GO:0006207,GO:0006220,GO:0006221,GO:0006725,GO:0006753,GO:0006793,GO:0006796,GO:0006807,GO:0008150,GO:0008152,GO:0009058,GO:0009112,GO:0009117,GO:0009165,GO:0009218,GO:0009220,GO:0009259,GO:0009260,GO:0009987,GO:0016740,GO:0016757,GO:0016763,GO:0018130,GO:0019438,GO:…
contig_1036_np1212_3254	F	dbpA	DEAD-box RNA helicase involved in the assembly of the 50S ribosomal subunit. Has an RNA-dependent ATPase activity, which is specific for 23S rRNA, and a 3' to 5' RNA helicase activity that uses the energy of ATP hydrolysis to destabilize and unwind short rRNA duplexes	ko:K05591	DEAD,DbpA,Helicase_C	GO:0000027,GO:0000166,GO:0003674,GO:0003676,GO:0003723,GO:0003724,GO:0003824,GO:0004004,GO:0004386,GO:0005488,GO:0005524,GO:0005575,GO:0005622,GO:0005623,GO:0005737,GO:0006139,GO:0006725,GO:0006807,GO:0006996,GO:0008026,GO:0008144,GO:0008150,GO:0008152,GO:0008186,GO:0009987,GO:0010501,GO:0016043,GO:0016070,GO:0016462,GO:0016787,GO:0016817,GO:0016818,GO:0016887,GO:0017076,GO:0017111,GO:0019843,GO:…
contig_1036_np1212_3373	F	-	Catalyzes the conversion of N5-carboxyaminoimidazole ribonucleotide (N5-CAIR) to 4-carboxy-5-aminoimidazole ribonucleotide (CAIR)	ko:K01588	AIRC	-
contig_1036_np1212_3394	F	add	Catalyzes the hydrolytic deamination of adenine to hypoxanthine. Plays an important role in the purine salvage pathway and in nitrogen catabolism	ko:K01488,ko:K21053	A_deaminase	-
contig_1036_np1212_3397	F	gpt	Acts on guanine, xanthine and to a lesser extent hypoxanthine	ko:K00769	Pribosyltran	-
contig_1036_np1212_3398	F	-	Amidohydrolase family	ko:K18456	Amidohydro_1	-
contig_1036_np1212_3450	F	-	Catalyzes the reduction of ribonucleotides to deoxyribonucleotides. May function to provide a pool of deoxyribonucleotide precursors for DNA repair during oxygen limitation and or for immediate growth after restoration of oxygen	ko:K00525	LAGLIDADG_3,Ribonuc_red_lgC,Ribonuc_red_lgN	-
contig_1036_np1212_3507	F	tdk	PFAM thymidine kinase	ko:K00857	TK	GO:0003674,GO:0003824,GO:0004797,GO:0005575,GO:0005622,GO:0005623,GO:0005737,GO:0005829,GO:0006139,GO:0006213,GO:0006259,GO:0006725,GO:0006753,GO:0006793,GO:0006796,GO:0006807,GO:0008150,GO:0008152,GO:0009058,GO:0009116,GO:0009117,GO:0009120,GO:0009123,GO:0009124,GO:0009157,GO:0009162,GO:0009165,GO:0009987,GO:0015949,GO:0016301,GO:0016310,GO:0016740,GO:0016772,GO:0018130,GO:0019136,GO:0019205,GO:…
contig_1036_np1212_3536	F	thrB	Belongs to the pseudomonas-type ThrB family	ko:K02204	APH	-
contig_1036_np1212_3649	F	phnN	Catalyzes the phosphorylation of ribose 1,5-bisphosphate to 5-phospho-D-ribosyl alpha-1-diphosphate (PRPP)	ko:K05774	AAA_18,Guanylate_kin	GO:0003674,GO:0003824,GO:0005575,GO:0005622,GO:0005623,GO:0005737,GO:0005829,GO:0005975,GO:0006015,GO:0006139,GO:0006725,GO:0006732,GO:0006733,GO:0006753,GO:0006793,GO:0006796,GO:0006807,GO:0008150,GO:0008152,GO:0009058,GO:0009108,GO:0009117,GO:0009165,GO:0009435,GO:0009987,GO:0016301,GO:0016310,GO:0016740,GO:0016772,GO:0016776,GO:0018130,GO:0019200,GO:0019359,GO:0019362,GO:0019363,GO:0019438,GO:…
contig_1036_np1212_3675	F	hydA	Amidohydrolase family	ko:K01464	Amidohydro_1	-
contig_1036_np1212_3684	F	rdgB	Pyrophosphatase that catalyzes the hydrolysis of nucleoside triphosphates to their monophosphate derivatives, with a high preference for the non-canonical purine nucleotides XTP (xanthosine triphosphate), dITP (deoxyinosine triphosphate) and ITP. Seems to function as a house-cleaning enzyme that removes non-canonical purine nucleotides from the nucleotide pool, thus preventing their incorporation…	ko:K02428	Ham1p_like	-
contig_1036_np1212_3764	F	gmk	Essential for recycling GMP and indirectly, cGMP	ko:K00942	Guanylate_kin	GO:0003674,GO:0003824,GO:0004385,GO:0005488,GO:0005515,GO:0005575,GO:0005622,GO:0005623,GO:0005737,GO:0005829,GO:0006139,GO:0006163,GO:0006725,GO:0006753,GO:0006793,GO:0006796,GO:0006807,GO:0008150,GO:0008152,GO:0009058,GO:0009116,GO:0009117,GO:0009119,GO:0009123,GO:0009126,GO:0009132,GO:0009135,GO:0009150,GO:0009161,GO:0009165,GO:0009167,GO:0009179,GO:0009185,GO:0009259,GO:0009987,GO:0015949,GO:…
contig_1036_np1212_3853	F	nadE	Catalyzes the ATP-dependent amidation of deamido-NAD to form NAD. Uses ammonia as a nitrogen source	ko:K01916	NAD_synthase	GO:0003674,GO:0003824,GO:0003952,GO:0005575,GO:0005622,GO:0005623,GO:0005737,GO:0006139,GO:0006725,GO:0006732,GO:0006733,GO:0006734,GO:0006753,GO:0006793,GO:0006796,GO:0006807,GO:0008150,GO:0008152,GO:0008795,GO:0009058,GO:0009108,GO:0009117,GO:0009165,GO:0009435,GO:0009987,GO:0016874,GO:0016879,GO:0016880,GO:0016884,GO:0018130,GO:0019359,GO:0019362,GO:0019363,GO:0019438,GO:0019637,GO:0019674,GO:…
contig_1036_np1212_3875	F	ushA	Belongs to the 5'-nucleotidase family	ko:K11751	5_nucleotid_C,Metallophos	-
contig_1036_np1212_3920	F	-	Dihydroorotate dehydrogenase	ko:K00254	DHO_dh	-
contig_1036_np1212_3959	F	-	Catalyzes the reduction of ribonucleotides to deoxyribonucleotides. May function to provide a pool of deoxyribonucleotide precursors for DNA repair during oxygen limitation and or for immediate growth after restoration of oxygen	ko:K00525	LAGLIDADG_3,Ribonuc_red_lgC,Ribonuc_red_lgN	-
contig_1036_np1212_3960	F	-	COG0209 Ribonucleotide reductase, alpha subunit	-	-	-
contig_1036_np1212_3981	F	ndk	Major role in the synthesis of nucleoside triphosphates other than ATP. The ATP gamma phosphate is transferred to the NDP beta phosphate via a ping-pong mechanism, using a phosphorylated active-site intermediate	ko:K00940	NDK	-
contig_1036_np1212_4011	F	-	Amidohydrolase family	-	Amidohydro_3	-
contig_1036_np1212_4067	F	prs	Involved in the biosynthesis of the central metabolite phospho-alpha-D-ribosyl-1-pyrophosphate (PRPP) via the transfer of pyrophosphoryl group from ATP to 1-hydroxyl of ribose-5-phosphate (Rib-5-P)	ko:K00948	Pribosyl_synth,Pribosyltran_N	-
contig_1036_np1212_4105	F	-	TRSP domain C terminus to PRTase_2	-	PRTase_2,TRSP	-
contig_1036_np1212_4154	F	glpK	Key enzyme in the regulation of glycerol uptake and metabolism. Catalyzes the phosphorylation of glycerol to yield sn- glycerol 3-phosphate	ko:K00864	FGGY_C,FGGY_N	GO:0003674,GO:0003824,GO:0004370,GO:0005975,GO:0006066,GO:0006071,GO:0006793,GO:0006796,GO:0008150,GO:0008152,GO:0009987,GO:0016301,GO:0016310,GO:0016740,GO:0016772,GO:0016773,GO:0019400,GO:0019751,GO:0044237,GO:0044238,GO:0044262,GO:0044281,GO:0071704,GO:1901615
contig_1036_np1212_731	FG	-	COG0537 Diadenosine tetraphosphate (Ap4A) hydrolase and other HIT family hydrolases	-	HIT	-
contig_1036_np1212_1683	FG	hinT	Diadenosine tetraphosphate (Ap4A) hydrolase and other HIT family	ko:K02503	DcpS_C,HIT	-
contig_1036_np1212_3676	FH	-	Permease for cytosine/purines, uracil, thiamine, allantoin	ko:K03457	Transp_cyt_pur	-
contig_1036_np1212_1757	FJ	miaE	COG4445 Hydroxylase for synthesis of 2-methylthio-cis-ribozeatin in tRNA	ko:K06169	MiaE	-
contig_1036_np1212_2521	FJ	tadA	Catalyzes the deamination of adenosine to inosine at the wobble position 34 of tRNA(Arg2)	ko:K11991	MafB19-deam,dCMP_cyt_deam_1	GO:0002097,GO:0002100,GO:0006139,GO:0006382,GO:0006396,GO:0006399,GO:0006400,GO:0006725,GO:0006807,GO:0008033,GO:0008150,GO:0008152,GO:0009451,GO:0009987,GO:0010467,GO:0016070,GO:0016553,GO:0034470,GO:0034641,GO:0034660,GO:0043170,GO:0043412,GO:0044237,GO:0044238,GO:0046483,GO:0071704,GO:0090304,GO:1901360
contig_1036_np1212_36	G	tktA	Catalyzes the transfer of a two-carbon ketol group from a ketose donor to an aldose acceptor, via a covalent intermediate with the cofactor thiamine pyrophosphate	ko:K00615	Transket_pyr,Transketolase_C,Transketolase_N	-
contig_1036_np1212_37	G	gap	Belongs to the glyceraldehyde-3-phosphate dehydrogenase family	ko:K00134,ko:K03472	Gp_dh_C,Gp_dh_N	-
contig_1036_np1212_143	G	-	Permease	-	DctM	-
contig_1036_np1212_144	G	-	TRAP-type C4-dicarboxylate transport system small permease component	-	DctQ	-
contig_1036_np1212_145	G	-	Bacterial extracellular solute-binding protein, family 7	-	DctP	-
contig_1036_np1212_251	G	rpe	Belongs to the ribulose-phosphate 3-epimerase family	ko:K01783	Ribul_P_3_epim	-
contig_1036_np1212_259	G	eda	COG0800 2-keto-3-deoxy-6-phosphogluconate aldolase	ko:K01625	Aldolase	-
contig_1036_np1212_260	G	pgl	COG0363 6-phosphogluconolactonase Glucosamine-6-phosphate isomerase deaminase	ko:K01057	Glucosamine_iso	-
contig_1036_np1212_261	G	zwf	Catalyzes the oxidation of glucose 6-phosphate to 6- phosphogluconolactone	ko:K00036	G6PD_C,G6PD_N	-
contig_1036_np1212_263	G	pyk	Belongs to the pyruvate kinase family	ko:K00873	PK,PK_C	-
contig_1036_np1212_264	G	gapA	Belongs to the glyceraldehyde-3-phosphate dehydrogenase family	ko:K00134	Gp_dh_C,Gp_dh_N	-
contig_1036_np1212_300	G	-	TRAP C4-dicarboxylate transport system permease DctM subunit	-	DctM	-
contig_1036_np1212_301	G	dctQ2	TRAP dicarboxylate transporter, DctQ subunit	-	DctQ	-
contig_1036_np1212_302	G	-	transport system periplasmic component	-	DctP	-
contig_1036_np1212_342	G	algC	phosphomannomutase	ko:K15778	PGM_PMM_I,PGM_PMM_II,PGM_PMM_III,PGM_PMM_IV	-
contig_1036_np1212_458	G	gph	HAD-hyrolase-like	ko:K01091	HAD_2	-
contig_1036_np1212_580	G	gapA	Belongs to the glyceraldehyde-3-phosphate dehydrogenase family	ko:K00134	Gp_dh_C,Gp_dh_N	-
contig_1036_np1212_662	G	wecB	Belongs to the UDP-N-acetylglucosamine 2-epimerase family	ko:K01791	Epimerase_2	-
contig_1036_np1212_710	G	gmhA	Catalyzes the isomerization of sedoheptulose 7-phosphate in D-glycero-D-manno-heptose 7-phosphate	ko:K03271,ko:K12961	SIS_2	-
contig_1036_np1212_725	G	pgi	Belongs to the GPI family	ko:K01810	PGI	GO:0003674,GO:0003824,GO:0004347,GO:0005488,GO:0005515,GO:0005575,GO:0005622,GO:0005623,GO:0005737,GO:0005829,GO:0005975,GO:0006082,GO:0006090,GO:0006091,GO:0006096,GO:0006139,GO:0006163,GO:0006164,GO:0006165,GO:0006725,GO:0006732,GO:0006733,GO:0006753,GO:0006754,GO:0006757,GO:0006793,GO:0006796,GO:0006807,GO:0006950,GO:0006979,GO:0008150,GO:0008152,GO:0009056,GO:0009058,GO:0009108,GO:0009117,GO:…
contig_1036_np1212_886	G	ugpB	Bacterial extracellular solute-binding protein	ko:K05813	SBP_bac_8	-
contig_1036_np1212_915	G	-	Domain of unknown function (DUF4147)	ko:K11529	DUF4147,MOFRL	-
contig_1036_np1212_997	G	ptsO	Phosphocarrier protein HPr	ko:K08485,ko:K11189	PTS-HPr	-
contig_1036_np1212_999	G	ptsN	PTS fructose transporter subunit IIA	ko:K02806	PTS_EIIA_2	-
contig_1036_np1212_1022	G	-	COG1638 TRAP-type C4-dicarboxylate transport system, periplasmic component	ko:K11688,ko:K21395	DctP	-
contig_1036_np1212_1024	G	-	TRAP C4-dicarboxylate transport system permease DctM subunit	-	DctM	-
contig_1036_np1212_1077	G	-	Peptidyl-prolyl cis-trans	ko:K03775	FKBP_C	-
contig_1036_np1212_1090	G	aqpZ	Channel that permits osmotically driven movement of water in both directions. It is involved in the osmoregulation and in the maintenance of cell turgor during volume expansion in rapidly growing cells. It mediates rapid entry or exit of water in response to abrupt changes in osmolarity	ko:K06188	MIP	GO:0003674,GO:0005215,GO:0005372,GO:0005488,GO:0005515,GO:0005575,GO:0005623,GO:0005886,GO:0005887,GO:0006810,GO:0006833,GO:0006884,GO:0006950,GO:0006970,GO:0008150,GO:0008361,GO:0009628,GO:0009987,GO:0009992,GO:0015250,GO:0015267,GO:0015318,GO:0016020,GO:0016021,GO:0016043,GO:0019725,GO:0022803,GO:0022838,GO:0022857,GO:0030104,GO:0031224,GO:0031226,GO:0032535,GO:0042044,GO:0042592,GO:0042802,GO:…
contig_1036_np1212_1113	G	-	C4-dicarboxylate transport system	-	DctM	-
contig_1036_np1212_1114	G	-	COG3090 TRAP-type C4-dicarboxylate transport system, small permease component	-	DctQ	-
contig_1036_np1212_1115	G	-	Bacterial extracellular solute-binding protein, family 7	-	DctP	-
contig_1036_np1212_1158	G	-	Major facilitator Superfamily	-	MFS_1	-
contig_1036_np1212_1159	G	-	Major facilitator Superfamily	-	MFS_1	-
contig_1036_np1212_1175	G	-	cell wall glycoprotein biosynthetic process	-	-	-
contig_1036_np1212_1390	G	-	beta-galactosidase	ko:K12308	Glyco_hydro_42,Glyco_hydro_42C,Glyco_hydro_42M	-
contig_1036_np1212_1391	G	-	beta-galactosidase	ko:K12308	Glyco_hydro_42,Glyco_hydro_42C,Glyco_hydro_42M	-
contig_1036_np1212_1394	G	-	Binding-protein-dependent transport system inner membrane component	ko:K02025,ko:K10189	BPD_transp_1	-
contig_1036_np1212_1395	G	-	Binding-protein-dependent transport system inner membrane component	ko:K10190	BPD_transp_1	-
contig_1036_np1212_1396	G	-	Bacterial extracellular solute-binding protein	ko:K10188	SBP_bac_1	-
contig_1036_np1212_1481	G	prpB	Catalyzes the thermodynamically favored C-C bond cleavage of (2R,3S)-2-methylisocitrate to yield pyruvate and succinate	ko:K03417	PEP_mutase	-
contig_1036_np1212_1539	G	puuE	xylanase chitin deacetylase	ko:K01452,ko:K16842,ko:K22278	Polysacc_deac_1	-
contig_1036_np1212_1625	G	ectC	Catalyzes the circularization of gamma-N-acetyl- alpha,gamma-diaminobutyric acid (ADABA) to ectoine (1,4,5,6- tetrahydro-2-methyl-4-pyrimidine carboxylic acid), which is an excellent osmoprotectant	ko:K06720	Ectoine_synth	-
contig_1036_np1212_1626	G	-	Bacterial extracellular solute-binding protein, family 7	-	DctP	-
contig_1036_np1212_1627	G	uehB	COG3090 TRAP-type C4-dicarboxylate transport system small permease component	-	DctQ	-
contig_1036_np1212_1628	G	-	Tripartite ATP-independent periplasmic transporter, DctM component	-	DctM	-
contig_1036_np1212_1694	G	-	ABC transporter substrate-binding protein	ko:K17321	SBP_bac_1,SBP_bac_8	-
contig_1036_np1212_1783	G	cobC	Phosphoglycerate mutase family	ko:K02226,ko:K15634	His_Phos_1	-
contig_1036_np1212_1803	G	-	COG0477 Permeases of the major facilitator superfamily	ko:K08218	Acatn,MFS_1	-
contig_1036_np1212_1824	G	nagZ	Plays a role in peptidoglycan recycling by cleaving the terminal beta-1,4-linked N-acetylglucosamine (GlcNAc) from peptide-linked peptidoglycan fragments, giving rise to free GlcNAc, anhydro-N-acetylmuramic acid and anhydro-N-acetylmuramic acid-linked peptides	ko:K01207	Glyco_hydro_3	-
contig_1036_np1212_1921	G	-	D-galactarate dehydratase / Altronate hydrolase, C terminus	-	GD_AH_C,SAF	-
contig_1036_np1212_1922	G	-	TRAP-type C4-dicarboxylate transport system periplasmic component	-	DctP	-
contig_1036_np1212_1923	G	-	Trap-type c4-dicarboxylate transport system, small permease component	ko:K11689	DctQ	-
contig_1036_np1212_1924	G	-	Trap dicarboxylate transporter-dctm subunit	-	DctM	-
contig_1036_np1212_1927	G	nanE	Converts N-acetylmannosamine-6-phosphate (ManNAc-6-P) to N-acetylglucosamine-6-phosphate (GlcNAc-6-P)	ko:K13967	NanE,ROK	-
contig_1036_np1212_2053	G	-	Class II Aldolase and Adducin N-terminal domain	-	Aldolase_II	-
contig_1036_np1212_2119	G	-	COG1593 TRAP-type C4-dicarboxylate transport system large permease component	-	DctM	-
contig_1036_np1212_2120	G	-	Tripartite ATP-independent periplasmic transporters, DctQ component	-	DctQ	-
contig_1036_np1212_2121	G	-	Trap-type c4-dicarboxylate transport system, periplasmic component	-	DctP	-
contig_1036_np1212_2170	G	gpmI	Catalyzes the interconversion of 2-phosphoglycerate and 3-phosphoglycerate	ko:K15633	Metalloenzyme,Phosphodiest,iPGM_N	-
contig_1036_np1212_2240	G	-	pfkB family carbohydrate kinase	ko:K00852	PfkB	-
contig_1036_np1212_2308	G	tpiA	Involved in the gluconeogenesis. Catalyzes stereospecifically the conversion of dihydroxyacetone phosphate (DHAP) to D-glyceraldehyde-3-phosphate (G3P)	ko:K01803	TIM	-
contig_1036_np1212_2309	G	glmM	Catalyzes the conversion of glucosamine-6-phosphate to glucosamine-1-phosphate	ko:K03431	PGM_PMM_I,PGM_PMM_II,PGM_PMM_III,PGM_PMM_IV	-
contig_1036_np1212_2359	G	fbp	D-fructose-1,6-bisphosphate 1-phosphohydrolase class 1	ko:K03841	FBPase	-
contig_1036_np1212_2392	G	dgoK	2-keto-3-deoxy-galactonokinase	ko:K00883	DGOK	-
contig_1036_np1212_2393	G	dgoA	Aldolase	ko:K01631	Aldolase	GO:0003674,GO:0003824,GO:0005975,GO:0006082,GO:0008150,GO:0008152,GO:0008674,GO:0009056,GO:0009987,GO:0016052,GO:0016054,GO:0016829,GO:0016830,GO:0016832,GO:0019520,GO:0019583,GO:0019584,GO:0019752,GO:0032787,GO:0034192,GO:0034194,GO:0043436,GO:0044237,GO:0044238,GO:0044248,GO:0044262,GO:0044275,GO:0044281,GO:0044282,GO:0046176,GO:0046395,GO:0071704,GO:0072329,GO:1901575
contig_1036_np1212_2394	G	-	Senescence marker protein-30	ko:K13874	SGL	-
contig_1036_np1212_2395	G	nagB	Catalyzes the reversible isomerization-deamination of glucosamine 6-phosphate (GlcN6P) to form fructose 6-phosphate (Fru6P) and ammonium ion	ko:K02564	Glucosamine_iso	-
contig_1036_np1212_2396	G	-	BadF/BadG/BcrA/BcrD ATPase family	ko:K18676	BcrAD_BadFG	-
contig_1036_np1212_2397	G	nagA	Belongs to the metallo-dependent hydrolases superfamily. NagA family	ko:K01443	Amidohydro_1	-
contig_1036_np1212_2406	G	tal	Transaldolase is important for the balance of metabolites in the pentose-phosphate pathway	ko:K00616	TAL_FSA	GO:0003674,GO:0003824,GO:0004801,GO:0016740,GO:0016744
contig_1036_np1212_2422	G	ppnK	Involved in the regulation of the intracellular balance of NAD and NADP, and is a key enzyme in the biosynthesis of NADP. Catalyzes specifically the phosphorylation on 2'-hydroxyl of the adenosine moiety of NAD to yield NADP	ko:K00858	NAD_kinase	-
contig_1036_np1212_2466	G	fda	aldolase	ko:K01623	Glycolytic	-
contig_1036_np1212_2492	G	-	Inositol monophosphatase family	ko:K01092	Inositol_P	-
contig_1036_np1212_2496	G	pgi	Belongs to the GPI family	ko:K01810	PGI	GO:0003674,GO:0003824,GO:0004347,GO:0005488,GO:0005515,GO:0005575,GO:0005622,GO:0005623,GO:0005737,GO:0005829,GO:0005975,GO:0006082,GO:0006090,GO:0006091,GO:0006096,GO:0006139,GO:0006163,GO:0006164,GO:0006165,GO:0006725,GO:0006732,GO:0006733,GO:0006753,GO:0006754,GO:0006757,GO:0006793,GO:0006796,GO:0006807,GO:0006950,GO:0006979,GO:0008150,GO:0008152,GO:0009056,GO:0009058,GO:0009108,GO:0009117,GO:…
contig_1036_np1212_2615	G	-	Sugar (and other) transporter	-	MFS_1	-
contig_1036_np1212_2673	G	eno	Catalyzes the reversible conversion of 2- phosphoglycerate into phosphoenolpyruvate. It is essential for the degradation of carbohydrates via glycolysis	ko:K01689	Enolase_C,Enolase_N	GO:0000015,GO:0000287,GO:0003674,GO:0003824,GO:0004634,GO:0005488,GO:0005515,GO:0005575,GO:0005576,GO:0005622,GO:0005623,GO:0005737,GO:0005829,GO:0005856,GO:0005975,GO:0006082,GO:0006090,GO:0006091,GO:0006096,GO:0006139,GO:0006163,GO:0006164,GO:0006165,GO:0006725,GO:0006732,GO:0006733,GO:0006753,GO:0006754,GO:0006757,GO:0006793,GO:0006796,GO:0006807,GO:0008150,GO:0008152,GO:0009056,GO:0009058,GO:…
contig_1036_np1212_2851	G	-	TRAP-type C4-dicarboxylate transport system, periplasmic component	-	DctP	-
contig_1036_np1212_2931	G	-	Glycosyl transferase	-	DUF3524,Glycos_transf_1	-
contig_1036_np1212_3091	G	-	alpha-ribazole phosphatase activity	ko:K02226,ko:K22305	His_Phos_1	-
contig_1036_np1212_3219	G	-	Catalyzes the isomerization of sedoheptulose 7-phosphate in D-glycero-D-manno-heptose 7-phosphate	ko:K03271	SIS_2	-
contig_1036_np1212_3243	G	-	TRAP C4-dicarboxylate transport system permease DctM subunit	ko:K11690	DctM	-
contig_1036_np1212_3244	G	-	PFAM Tripartite ATP-independent periplasmic transporter, DctQ component	ko:K11689	DctQ	-
contig_1036_np1212_3245	G	dctP	Bacterial extracellular solute-binding protein, family 7	ko:K11688	DctP	GO:0005575,GO:0005623,GO:0006810,GO:0006811,GO:0006820,GO:0006835,GO:0008150,GO:0015711,GO:0015740,GO:0015849,GO:0030288,GO:0030313,GO:0031975,GO:0042597,GO:0044464,GO:0046942,GO:0051179,GO:0051234,GO:0071702
contig_1036_np1212_3365	G	rpiA	Catalyzes the reversible conversion of ribose-5- phosphate to ribulose 5-phosphate	ko:K01807	Rib_5-P_isom_A	-
contig_1036_np1212_3386	G	gtsA	Sugar ABC transporter substrate-binding protein	ko:K17315	SBP_bac_1,SBP_bac_8	-
contig_1036_np1212_3454	G	hyi2	Belongs to the hyi family	ko:K01816,ko:K22131	AP_endonuc_2	-
contig_1036_np1212_3455	G	ygbL	Aldolase	ko:K22130	Aldolase_II	GO:0003674,GO:0003824,GO:0005575,GO:0005622,GO:0005623,GO:0005737,GO:0005829,GO:0005975,GO:0005996,GO:0008150,GO:0008152,GO:0009056,GO:0016052,GO:0016829,GO:0016830,GO:0016832,GO:0019321,GO:0019323,GO:0044238,GO:0044281,GO:0044282,GO:0044424,GO:0044444,GO:0044464,GO:0046365,GO:0071704,GO:1901575
contig_1036_np1212_3459	G	-	PFAM TRAP C4-dicarboxylate transport system permease DctM subunit	-	DctM	-
contig_1036_np1212_3460	G	-	tripartite ATP-independent periplasmic transporter	-	DctQ	-
contig_1036_np1212_3461	G	-	TIGRFAM TRAP dicarboxylate transporter, DctP subunit	-	DctP	-
contig_1036_np1212_3496	G	-	COG2513 PEP phosphonomutase and related enzymes	-	PEP_mutase	-
contig_1036_np1212_3840	G	-	Phosphoglycerate mutase family	-	His_Phos_1	-
contig_1036_np1212_3843	G	gpmB	PFAM Phosphoglycerate mutase	ko:K15634	His_Phos_1	-
contig_1036_np1212_3906	G	dctP	COG1638 TRAP-type C4-dicarboxylate transport system, periplasmic component	-	DctP	-
contig_1036_np1212_3907	G	-	PFAM Tripartite ATP-independent periplasmic transporter, DctQ component	-	DctQ	-
contig_1036_np1212_3908	G	-	PFAM TRAP C4-dicarboxylate transport system permease DctM subunit	-	DctM	-
contig_1036_np1212_3978	G	-	Inositol monophosphatase	ko:K01092	Inositol_P	-
contig_1036_np1212_4032	G	-	Cupin domain	-	3-HAO,Cupin_2	-
contig_1036_np1212_1928	GK	-	ROK family	ko:K00885	ROK	-
contig_1036_np1212_2857	GK	yeiI	Helix-turn-helix type 11 domain protein	ko:K16328	HTH_24,PfkB	GO:0003674,GO:0003824,GO:0006793,GO:0006796,GO:0008150,GO:0008152,GO:0009987,GO:0016301,GO:0016310,GO:0016740,GO:0016772,GO:0016773,GO:0044237,GO:0050225
contig_1036_np1212_695	GM	-	capsular polysaccharide biosynthesis protein	-	-	-
contig_1036_np1212_2550	GM	wbpM	Polysaccharide biosynthesis protein	-	CoA_binding_3,Polysacc_synt_2	-
contig_1036_np1212_2570	GM	fcl	GDP-mannose 4,6 dehydratase	ko:K02377	Epimerase	GO:0003674,GO:0003824,GO:0005575,GO:0005622,GO:0005623,GO:0005737,GO:0006139,GO:0006725,GO:0006793,GO:0006807,GO:0008150,GO:0008152,GO:0009058,GO:0009225,GO:0009226,GO:0009987,GO:0016491,GO:0016614,GO:0016616,GO:0018130,GO:0019438,GO:0034641,GO:0034654,GO:0042350,GO:0044237,GO:0044238,GO:0044249,GO:0044271,GO:0044281,GO:0044424,GO:0044464,GO:0046368,GO:0046483,GO:0050577,GO:0055086,GO:0055114,GO:…
contig_1036_np1212_3257	GM	-	NAD(P)H-binding	-	NAD_binding_10	-
contig_1036_np1212_3362	GM	-	epimerase	-	Epimerase,NAD_binding_10,RmlD_sub_bind	-
contig_1036_np1212_3622	GM	-	NmrA-like family	-	NAD_binding_10,NmrA	-
contig_1036_np1212_3818	GM	-	DoxX-like family	-	DoxX_3,Epimerase,NAD_binding_10	-
contig_1036_np1212_3909	GM	udh	Male sterility protein	ko:K18981	Epimerase	-
contig_1036_np1212_21	H	pckA	Involved in the gluconeogenesis. Catalyzes the conversion of oxaloacetate (OAA) to phosphoenolpyruvate (PEP) through direct phosphoryl transfer between the nucleoside triphosphate and OAA	ko:K01610	PEPCK_ATP	-
contig_1036_np1212_24	H	ubiD	Catalyzes the decarboxylation of 3-octaprenyl-4-hydroxy benzoate to 2-octaprenylphenol, an intermediate step in ubiquinone biosynthesis	ko:K03182	UbiD	-
contig_1036_np1212_32	H	gshB	Belongs to the prokaryotic GSH synthase family	ko:K01920	GSH-S_ATP,GSH-S_N	GO:0000287,GO:0003674,GO:0003824,GO:0004363,GO:0005488,GO:0005575,GO:0005622,GO:0005623,GO:0005737,GO:0005829,GO:0006518,GO:0006575,GO:0006749,GO:0006750,GO:0006790,GO:0006807,GO:0008150,GO:0008152,GO:0009058,GO:0009987,GO:0016874,GO:0016879,GO:0016881,GO:0019184,GO:0034641,GO:0042398,GO:0043043,GO:0043167,GO:0043169,GO:0043603,GO:0043604,GO:0044237,GO:0044249,GO:0044271,GO:0044272,GO:0044424,GO:…
contig_1036_np1212_34	H	metK	Catalyzes the formation of S-adenosylmethionine (AdoMet) from methionine and ATP. The overall synthetic reaction is composed of two sequential steps, AdoMet formation and the subsequent tripolyphosphate hydrolysis which occurs prior to release of AdoMet from the enzyme	ko:K00789	S-AdoMet_synt_C,S-AdoMet_synt_M,S-AdoMet_synt_N	-
contig_1036_np1212_42	H	ubiE	Methyltransferase required for the conversion of demethylmenaquinol (DMKH2) to menaquinol (MKH2) and the conversion of 2-polyprenyl-6-methoxy-1,4-benzoquinol (DDMQH2) to 2- polyprenyl-3-methyl-6-methoxy-1,4-benzoquinol (DMQH2)	ko:K03183	Ubie_methyltran	-
contig_1036_np1212_53	H	ispB	Belongs to the FPP GGPP synthase family	ko:K02523	polyprenyl_synt	-
contig_1036_np1212_61	H	ribF	Belongs to the ribF family	ko:K11753	FAD_syn,Flavokinase	-
contig_1036_np1212_119	H	thiI	Catalyzes the ATP-dependent transfer of a sulfur to tRNA to produce 4-thiouridine in position 8 of tRNAs, which functions as a near-UV photosensor. Also catalyzes the transfer of sulfur to the sulfur carrier protein ThiS, forming ThiS-thiocarboxylate. This is a step in the synthesis of thiazole, in the thiamine biosynthesis pathway. The sulfur is donated as persulfide by IscS	ko:K03151	THUMP,ThiI	-
contig_1036_np1212_147	H	-	Cobalamin biosynthesis protein CobT VWA domain	ko:K09883	CobT,CobT_C	-
contig_1036_np1212_238	H	folB	Catalyzes the conversion of 7,8-dihydroneopterin to 6- hydroxymethyl-7,8-dihydropterin	ko:K01633	FolB	-
contig_1036_np1212_244	H	pdxA	Catalyzes the NAD(P)-dependent oxidation of 4- (phosphohydroxy)-L-threonine (HTP) into 2-amino-3-oxo-4- (phosphohydroxy)butyric acid which spontaneously decarboxylates to form 3-amino-2-oxopropyl phosphate (AHAP)	ko:K00097	PdxA	-
contig_1036_np1212_321	H	nnrD	Bifunctional enzyme that catalyzes the epimerization of the S- and R-forms of NAD(P)HX and the dehydration of the S-form of NAD(P)HX at the expense of ADP, which is converted to AMP. This allows the repair of both epimers of NAD(P)HX, a damaged form of NAD(P)H that is a result of enzymatic or heat-dependent hydration	ko:K17758,ko:K17759	Carb_kinase,YjeF_N	-
contig_1036_np1212_344	H	coaBC	Catalyzes two steps in the biosynthesis of coenzyme A. In the first step cysteine is conjugated to 4'-phosphopantothenate to form 4-phosphopantothenoylcysteine, in the latter compound is decarboxylated to form 4'-phosphopantotheine	ko:K13038	DFP,Flavoprotein	-
contig_1036_np1212_364	H	ribE	COG0307 Riboflavin synthase alpha chain	ko:K00793	Lum_binding	-
contig_1036_np1212_466	H	ubiG	O-methyltransferase that catalyzes the 2 O-methylation steps in the ubiquinone biosynthetic pathway	ko:K00568	Methyltransf_23	-
contig_1036_np1212_699	H	-	Probable molybdopterin binding domain	-	MoCF_biosynth	-
contig_1036_np1212_700	H	mobA	Transfers a GMP moiety from GTP to Mo-molybdopterin (Mo- MPT) cofactor (Moco or molybdenum cofactor) to form Mo- molybdopterin guanine dinucleotide (Mo-MGD) cofactor	ko:K03752	NTP_transf_3	-
contig_1036_np1212_713	H	rsmI	Catalyzes the 2'-O-methylation of the ribose of cytidine 1402 (C1402) in 16S rRNA	ko:K07056	TP_methylase	-
contig_1036_np1212_724	H	pdxJ	Catalyzes the complicated ring closure reaction between the two acyclic compounds 1-deoxy-D-xylulose-5-phosphate (DXP) and 3-amino-2-oxopropyl phosphate (1-amino-acetone-3-phosphate or AAP) to form pyridoxine 5'-phosphate (PNP) and inorganic phosphate	ko:K03474	PdxJ	-
contig_1036_np1212_740	H	apbE	Flavin transferase that catalyzes the transfer of the FMN moiety of FAD and its covalent binding to the hydroxyl group of a threonine residue in a target flavoprotein	ko:K03734	ApbE	-
contig_1036_np1212_741	H	Z012_07620	Protein conserved in bacteria	ko:K03734,ko:K05952	NqrM	-
contig_1036_np1212_766	H	paaK	AMP-binding enzyme	ko:K01912	AMP-binding,AMP-binding_C_2	GO:0003674,GO:0003824,GO:0006082,GO:0006725,GO:0006805,GO:0008150,GO:0008152,GO:0009056,GO:0009404,GO:0009407,GO:0009410,GO:0009636,GO:0009850,GO:0009852,GO:0009987,GO:0010124,GO:0010817,GO:0016054,GO:0016405,GO:0016874,GO:0016877,GO:0016878,GO:0019439,GO:0019748,GO:0019752,GO:0032787,GO:0042178,GO:0042221,GO:0042445,GO:0042447,GO:0042537,GO:0043436,GO:0044237,GO:0044248,GO:0044281,GO:0044282,GO:…
contig_1036_np1212_772	H	-	ubiquinone biosynthetic process	-	-	-
contig_1036_np1212_784	H	selU	Catalyzes the transfer of selenium from selenophosphate for conversion of 2-thiouridine to 2-selenouridine at the wobble position in tRNA	ko:K06917	Rhodanese	-
contig_1036_np1212_788	H	nadB	Catalyzes the oxidation of L-aspartate to iminoaspartate	ko:K00278	FAD_binding_2,Succ_DH_flav_C	-
contig_1036_np1212_817	H	cmoA	Catalyzes the conversion of S-adenosyl-L-methionine (SAM) to carboxy-S-adenosyl-L-methionine (Cx-SAM)	ko:K15256	Methyltransf_25	-
contig_1036_np1212_844	H	metH	Vitamin B12 dependent methionine synthase activation	ko:K00548,ko:K15023	B12-binding,B12-binding_2,Met_synt_B12,Pterin_bind,S-methyl_trans	-
contig_1036_np1212_859	H	-	UBA THIF-type NAD FAD binding	ko:K22132	ThiF	-
contig_1036_np1212_917	H	thiC	Catalyzes the synthesis of the hydroxymethylpyrimidine phosphate (HMP-P) moiety of thiamine from aminoimidazole ribotide (AIR) in a radical S-adenosyl-L-methionine (SAM)-dependent reaction	ko:K03147	ThiC-associated,ThiC_Rad_SAM	GO:0003674,GO:0003824,GO:0005575,GO:0005622,GO:0005623,GO:0005737,GO:0005829,GO:0006725,GO:0006766,GO:0006767,GO:0006772,GO:0006790,GO:0006807,GO:0008150,GO:0008152,GO:0009058,GO:0009110,GO:0009228,GO:0009987,GO:0017144,GO:0018130,GO:0019438,GO:0034641,GO:0042364,GO:0042723,GO:0042724,GO:0044237,GO:0044249,GO:0044271,GO:0044272,GO:0044281,GO:0044283,GO:0044424,GO:0044444,GO:0044464,GO:0046483,GO:…
contig_1036_np1212_951	H	pdxB	Catalyzes the oxidation of erythronate-4-phosphate to 3- hydroxy-2-oxo-4-phosphonooxybutanoate	ko:K03473	2-Hacid_dh,2-Hacid_dh_C,DUF3410	-
contig_1036_np1212_1048	H	menG	Catalyzes the aldol cleavage of 4-hydroxy-4-methyl-2- oxoglutarate (HMG) into 2 molecules of pyruvate. Also contains a secondary oxaloacetate (OAA) decarboxylase activity due to the common pyruvate enolate transition state formed following C-C bond cleavage in the retro-aldol and decarboxylation reactions	ko:K02553	RraA-like	-
contig_1036_np1212_1060	H	-	MafB19-like deaminase	-	dCMP_cyt_deam_1	-
contig_1036_np1212_1121	H	nadA	Catalyzes the condensation of iminoaspartate with dihydroxyacetone phosphate to form quinolinate	ko:K03517	NadA	-
contig_1036_np1212_1153	H	-	AMP-binding enzyme	ko:K01912	AMP-binding,AMP-binding_C_2	-
contig_1036_np1212_1216	H	hemN	Belongs to the anaerobic coproporphyrinogen-III oxidase family	-	HemN_C,Radical_SAM	-
contig_1036_np1212_1259	H	moaE	Molybdenum cofactor biosynthesis protein	ko:K03635	MoaE	-
contig_1036_np1212_1263	H	-	ATP:guanido phosphotransferase, N-terminal domain	ko:K00933,ko:K00934	ATP-gua_Ptrans,ATP-gua_PtransN	-
contig_1036_np1212_1289	H	hemB	Delta-aminolevulinic acid dehydratase	ko:K01698	ALAD	GO:0000287,GO:0003674,GO:0003824,GO:0004655,GO:0005488,GO:0005575,GO:0005622,GO:0005623,GO:0005737,GO:0005829,GO:0006725,GO:0006778,GO:0006779,GO:0006783,GO:0006807,GO:0008150,GO:0008152,GO:0008270,GO:0009058,GO:0009987,GO:0016829,GO:0016835,GO:0016836,GO:0018130,GO:0019438,GO:0033013,GO:0033014,GO:0034641,GO:0042168,GO:0042440,GO:0043167,GO:0043169,GO:0044237,GO:0044249,GO:0044271,GO:0044424,GO:…
contig_1036_np1212_1319	H	gntK	TIGRFAM carbohydrate kinase, thermoresistant glucokinase family	ko:K00851	AAA_33,DctQ,SKI	GO:0003674,GO:0003824,GO:0006793,GO:0006796,GO:0008150,GO:0008152,GO:0009987,GO:0016301,GO:0016310,GO:0016740,GO:0016772,GO:0016773,GO:0044237,GO:0046316
contig_1036_np1212_1370	H	folC	Belongs to the folylpolyglutamate synthase family	ko:K11754	Mur_ligase_C,Mur_ligase_M	-
contig_1036_np1212_1383	H	mttB2	trimethylamine methyltransferase	ko:K14083	MTTB	-
contig_1036_np1212_1389	H	dgoK	COG3734 2-keto-3-deoxy-galactonokinase	ko:K00883	DGOK	-
contig_1036_np1212_1431	H	folE	catalyzes the formation of formate and 2-amino-4-hydroxy-6-(erythro-1,2, 3-trihydroxypropyl)dihydropteridine triphosphate from GTP and water	ko:K01495	GTP_cyclohydroI	-
contig_1036_np1212_1510	H	-	ATPases associated with a variety of cellular activities	ko:K02062	ABC_tran	-
contig_1036_np1212_1518	H	nadV	Nicotinate phosphoribosyltransferase (NAPRTase) family	ko:K03462	NAPRTase	-
contig_1036_np1212_1608	H	-	Belongs to the class I-like SAM-binding methyltransferase superfamily. C5-methyltransferase family	ko:K00558	DNA_methylase	-
contig_1036_np1212_1637	H	thiS	ThiS family	ko:K03154	ThiS	-
contig_1036_np1212_1638	H	thiG	Thiazole biosynthesis protein ThiG	ko:K03149	ThiG	GO:0003674,GO:0003824,GO:0006725,GO:0006766,GO:0006767,GO:0006772,GO:0006790,GO:0006807,GO:0008150,GO:0008152,GO:0009058,GO:0009110,GO:0009228,GO:0009987,GO:0017144,GO:0018130,GO:0019438,GO:0034641,GO:0042364,GO:0042723,GO:0042724,GO:0044237,GO:0044249,GO:0044271,GO:0044272,GO:0044281,GO:0044283,GO:0046483,GO:0071704,GO:0072527,GO:0072528,GO:1901360,GO:1901362,GO:1901564,GO:1901566,GO:1901576
contig_1036_np1212_1639	H	thiE	Thiamine-phosphate pyrophosphorylase	ko:K00941,ko:K14153	Phos_pyr_kin,TMP-TENI	-
contig_1036_np1212_1732	H	phhB	pterin-4-alpha-carbinolamine dehydratase	ko:K01724	Pterin_4a	-
contig_1036_np1212_1741	H	nadC	Belongs to the NadC ModD family	ko:K00767	QRPTase_C,QRPTase_N	GO:0003674,GO:0003824,GO:0004514,GO:0005575,GO:0005622,GO:0005623,GO:0005737,GO:0005829,GO:0006082,GO:0006139,GO:0006520,GO:0006531,GO:0006725,GO:0006732,GO:0006733,GO:0006753,GO:0006793,GO:0006796,GO:0006807,GO:0008150,GO:0008152,GO:0009056,GO:0009058,GO:0009066,GO:0009108,GO:0009117,GO:0009165,GO:0009435,GO:0009987,GO:0016054,GO:0016740,GO:0016757,GO:0016763,GO:0017144,GO:0018130,GO:0019355,GO:…
contig_1036_np1212_1746	H	coaE	Catalyzes the phosphorylation of the 3'-hydroxyl group of dephosphocoenzyme A to form coenzyme A	ko:K00859	CoaE	GO:0003674,GO:0003824,GO:0004140,GO:0006139,GO:0006163,GO:0006164,GO:0006725,GO:0006732,GO:0006753,GO:0006793,GO:0006796,GO:0006807,GO:0008150,GO:0008152,GO:0009058,GO:0009108,GO:0009117,GO:0009150,GO:0009152,GO:0009165,GO:0009259,GO:0009260,GO:0009987,GO:0015936,GO:0015937,GO:0016301,GO:0016310,GO:0016740,GO:0016772,GO:0016773,GO:0018130,GO:0019438,GO:0019637,GO:0019693,GO:0033865,GO:0033866,GO:…
contig_1036_np1212_1756	H	ttcA	Catalyzes the ATP-dependent 2-thiolation of cytidine in position 32 of tRNA, to form 2-thiocytidine (s(2)C32). The sulfur atoms are provided by the cysteine cysteine desulfurase (IscS) system	ko:K14058	ATP_bind_3	GO:0003674,GO:0003824,GO:0005488,GO:0005575,GO:0005622,GO:0005623,GO:0005737,GO:0005829,GO:0006139,GO:0006396,GO:0006399,GO:0006400,GO:0006725,GO:0006807,GO:0008033,GO:0008150,GO:0008152,GO:0009451,GO:0009987,GO:0010467,GO:0016070,GO:0016740,GO:0016782,GO:0016783,GO:0034227,GO:0034470,GO:0034641,GO:0034660,GO:0043170,GO:0043412,GO:0044237,GO:0044238,GO:0044424,GO:0044444,GO:0044464,GO:0046483,GO:…
contig_1036_np1212_1782	H	cobS	Joins adenosylcobinamide-GDP and alpha-ribazole to generate adenosylcobalamin (Ado-cobalamin). Also synthesizes adenosylcobalamin 5'-phosphate from adenosylcobinamide-GDP and alpha-ribazole 5'-phosphate	ko:K02233	CobS	GO:0003674,GO:0003824,GO:0005575,GO:0005623,GO:0005886,GO:0006725,GO:0006766,GO:0006767,GO:0006807,GO:0008150,GO:0008152,GO:0008818,GO:0009058,GO:0009110,GO:0009235,GO:0009236,GO:0009987,GO:0016020,GO:0016740,GO:0016772,GO:0016780,GO:0017144,GO:0018130,GO:0019438,GO:0033013,GO:0033014,GO:0034641,GO:0042364,GO:0044237,GO:0044249,GO:0044271,GO:0044281,GO:0044283,GO:0044464,GO:0046483,GO:0051186,GO:…
contig_1036_np1212_1785	H	cobU	Catalyzes ATP-dependent phosphorylation of adenosylcobinamide and addition of GMP to adenosylcobinamide phosphate	ko:K02231	CobU	-
contig_1036_np1212_1788	H	cobD	Converts cobyric acid to cobinamide by the addition of aminopropanol on the F carboxylic group	ko:K02227	CobD_Cbib	-
contig_1036_np1212_1789	H	cobQ	Catalyzes amidations at positions B, D, E, and G on adenosylcobyrinic A,C-diamide. NH(2) groups are provided by glutamine, and one molecule of ATP is hydrogenolyzed for each amidation	ko:K02232	AAA_26,CbiA,GATase_3	-
contig_1036_np1212_1790	H	cobN	Cobaltochelatase subunit CobN	ko:K02230	CobN-Mg_chel	-
contig_1036_np1212_1792	H	-	Belongs to the precorrin methyltransferase family	ko:K05936	TP_methylase	-
contig_1036_np1212_1793	H	cobJ	precorrin-3B C17-methyltransferase	ko:K05934,ko:K13540,ko:K13541	CbiG_N,TP_methylase	-
contig_1036_np1212_1794	H	-	Cobalamin biosynthesis protein CbiG	ko:K02189	CbiG_C,CbiG_N	-
contig_1036_np1212_1795	H	-	Belongs to the precorrin methyltransferase family	ko:K03394	TP_methylase	-
contig_1036_np1212_1796	H	cobL	precorrin-6y C5,15-methyltransferase	ko:K00595	Methyltransf_31,Methyltransf_4,PCMT,TP_methylase	-
contig_1036_np1212_1797	H	cobH	Precorrin-8X methylmutase	ko:K06042	CbiC	-
contig_1036_np1212_1798	H	cobK	precorrin-6x reductase	ko:K05895	CbiJ	-
contig_1036_np1212_1799	H	cbiD	Catalyzes the methylation of C-1 in cobalt-precorrin-5B to form cobalt-precorrin-6A	ko:K02188	CbiD	-
contig_1036_np1212_1800	H	-	Cobyrinic acid AC-diamide synthase	ko:K02224	AAA_26,CbiA,GATase_3	-
contig_1036_np1212_1801	H	-	Required for both de novo synthesis of the corrin ring for the assimilation of exogenous corrinoids. Participates in the adenosylation of a variety of incomplete and complete corrinoids	ko:K19221	Co_AT_N,CobA_CobO_BtuR	-
contig_1036_np1212_1802	H	bchI	magnesium chelatase	ko:K03404	AAA_5,Mg_chelatase,VWA_2	-
contig_1036_np1212_1805	H	panE	Catalyzes the NADPH-dependent reduction of ketopantoate into pantoic acid	ko:K00077	ApbA,ApbA_C	GO:0000166,GO:0003674,GO:0003824,GO:0005488,GO:0005575,GO:0005622,GO:0005623,GO:0005737,GO:0006082,GO:0006520,GO:0006573,GO:0006575,GO:0006732,GO:0006766,GO:0006767,GO:0006807,GO:0008150,GO:0008152,GO:0008677,GO:0009058,GO:0009081,GO:0009108,GO:0009110,GO:0009987,GO:0015939,GO:0015940,GO:0016053,GO:0016491,GO:0016614,GO:0016616,GO:0019752,GO:0032787,GO:0033317,GO:0034641,GO:0036094,GO:0042364,GO:…
contig_1036_np1212_1813	H	hemH	Catalyzes the ferrous insertion into protoporphyrin IX	ko:K01772	Ferrochelatase	-
contig_1036_np1212_1846	H	-	Reverse transcriptase (RNA-dependent DNA polymerase)	-	GIIM,RVT_1	-
contig_1036_np1212_1963	H	VP2944	COG3315 O-Methyltransferase involved in polyketide biosynthesis	-	LCM	-
contig_1036_np1212_2092	H	-	phenylacetate-CoA ligase activity	-	-	-
contig_1036_np1212_2142	H	-	Multifunctional enzyme that catalyzes the SAM-dependent methylations of uroporphyrinogen III at position C-2 and C-7 to form precorrin-2 via precorrin-1. Then it catalyzes the NAD- dependent ring dehydrogenation of precorrin-2 to yield sirohydrochlorin. Finally, it catalyzes the ferrochelation of sirohydrochlorin to yield siroheme	ko:K02303,ko:K13542	TP_methylase	-
contig_1036_np1212_2143	H	cysG	Multifunctional enzyme that catalyzes the SAM-dependent methylations of uroporphyrinogen III at position C-2 and C-7 to form precorrin-2 via precorrin-1. Then it catalyzes the NAD- dependent ring dehydrogenation of precorrin-2 to yield sirohydrochlorin. Finally, it catalyzes the ferrochelation of sirohydrochlorin to yield siroheme	ko:K02302,ko:K02303	CysG_dimeriser,NAD_binding_7,Sirohm_synth_M,TP_methylase	-
contig_1036_np1212_2148	H	cysD	COG0175 3'-phosphoadenosine 5'-phosphosulfate sulfotransferase (PAPS reductase) FAD synthetase and related enzymes	ko:K00957	PAPS_reduct	GO:0003674,GO:0003824,GO:0004779,GO:0004781,GO:0006790,GO:0006950,GO:0006979,GO:0008150,GO:0008152,GO:0009987,GO:0016740,GO:0016772,GO:0016779,GO:0044237,GO:0050896,GO:0070566
contig_1036_np1212_2267	H	-	Tellurite resistance protein TehB	-	-	-
contig_1036_np1212_2270	H	-	Belongs to the class-III pyridoxal-phosphate-dependent aminotransferase family	-	Aminotran_3	-
contig_1036_np1212_2282	H	ribH	Catalyzes the formation of 6,7-dimethyl-8- ribityllumazine by condensation of 5-amino-6-(D- ribitylamino)uracil with 3,4-dihydroxy-2-butanone 4-phosphate. This is the penultimate step in the biosynthesis of riboflavin	ko:K00794	DMRL_synthase	-
contig_1036_np1212_2299	H	can	Reversible hydration of carbon dioxide	ko:K01673	Pro_CA	-
contig_1036_np1212_2310	H	folP	Catalyzes the condensation of para-aminobenzoate (pABA) with 6-hydroxymethyl-7,8-dihydropterin diphosphate (DHPt-PP) to form 7,8-dihydropteroate (H2Pte), the immediate precursor of folate derivatives	ko:K00796	Pterin_bind	-
contig_1036_np1212_2357	H	ubiX	Flavin prenyltransferase that catalyzes the synthesis of the prenylated FMN cofactor (prenyl-FMN) for 4-hydroxy-3- polyprenylbenzoic acid decarboxylase UbiD. The prenyltransferase is metal-independent and links a dimethylallyl moiety from dimethylallyl monophosphate (DMAP) to the flavin N5 and C6 atoms of FMN	ko:K03186	Flavoprotein	-
contig_1036_np1212_2383	H	moaA	Catalyzes the cyclization of GTP to (8S)-3',8-cyclo-7,8- dihydroguanosine 5'-triphosphate	ko:K03639	Fer4_12,Mob_synth_C,Radical_SAM	-
contig_1036_np1212_2469	H	-	Belongs to the class-III pyridoxal-phosphate-dependent aminotransferase family	ko:K15785	Aminotran_3	-
contig_1036_np1212_2532	H	bioD	Catalyzes a mechanistically unusual reaction, the ATP- dependent insertion of CO2 between the N7 and N8 nitrogen atoms of 7,8-diaminopelargonic acid (DAPA) to form an ureido ring	ko:K01935	AAA_26	-
contig_1036_np1212_2533	H	bioC	Converts the free carboxyl group of a malonyl-thioester to its methyl ester by transfer of a methyl group from S-adenosyl- L-methionine (SAM). It allows to synthesize pimeloyl-ACP via the fatty acid synthetic pathway	ko:K02169	Methyltransf_11,Methyltransf_25	-
contig_1036_np1212_2535	H	bioF	Catalyzes the decarboxylative condensation of pimeloyl- acyl-carrier protein and L-alanine to produce 8-amino-7- oxononanoate (AON), acyl-carrier protein , and carbon dioxide	ko:K00652	Aminotran_1_2	-
contig_1036_np1212_2536	H	bioB	Catalyzes the conversion of dethiobiotin (DTB) to biotin by the insertion of a sulfur atom into dethiobiotin via a radical- based mechanism	ko:K01012	BATS,Radical_SAM	-
contig_1036_np1212_2539	H	bioA	Catalyzes the transfer of the alpha-amino group from S- adenosyl-L-methionine (SAM) to 7-keto-8-aminopelargonic acid (KAPA) to form 7,8-diaminopelargonic acid (DAPA). It is the only animotransferase known to utilize SAM as an amino donor	ko:K00833	Aminotran_3	-
contig_1036_np1212_2546	H	pcnB	Adds poly(A) tail to the 3' end of many RNAs, which usually targets these RNAs for decay. Plays a significant role in the global control of gene expression, through influencing the rate of transcript degradation, and in the general RNA quality control	ko:K00970	PolyA_pol,PolyA_pol_RNAbd,PolyA_pol_arg_C	GO:0003674,GO:0003676,GO:0003723,GO:0003824,GO:0004652,GO:0005488,GO:0005575,GO:0005622,GO:0005623,GO:0005737,GO:0005829,GO:0006139,GO:0006276,GO:0006378,GO:0006396,GO:0006397,GO:0006725,GO:0006807,GO:0008150,GO:0008152,GO:0009451,GO:0009987,GO:0010467,GO:0016070,GO:0016071,GO:0016740,GO:0016772,GO:0016779,GO:0031123,GO:0031124,GO:0034641,GO:0043170,GO:0043412,GO:0043631,GO:0044237,GO:0044238,GO:…
contig_1036_np1212_2547	H	-	2-amino-4-hydroxy-6-hydroxymethyldihydropteridine pyrophosphokinase	ko:K00950	HPPK	-
contig_1036_np1212_2548	H	panB	Catalyzes the reversible reaction in which hydroxymethyl group from 5,10-methylenetetrahydrofolate is transferred onto alpha-ketoisovalerate to form ketopantoate	ko:K00606	Pantoate_transf	-
contig_1036_np1212_2549	H	panC	Catalyzes the condensation of pantoate with beta-alanine in an ATP-dependent reaction via a pantoyl-adenylate intermediate	ko:K01918	Pantoate_ligase	-
contig_1036_np1212_2558	H	-	Catalyzes the formation of dTDP-glucose, from dTTP and glucose 1-phosphate, as well as its pyrophosphorolysis	ko:K00973	NTP_transferase	-
contig_1036_np1212_2636	H	moaD	Mo-molybdopterin cofactor metabolic process	ko:K03636,ko:K03637,ko:K03752,ko:K21142	ThiS	GO:0005575,GO:0005622,GO:0005623,GO:0005737,GO:0005829,GO:0006732,GO:0006777,GO:0006793,GO:0006796,GO:0006807,GO:0008150,GO:0008152,GO:0009058,GO:0009108,GO:0009987,GO:0018130,GO:0019538,GO:0019637,GO:0019720,GO:0043170,GO:0043545,GO:0044237,GO:0044238,GO:0044249,GO:0044260,GO:0044267,GO:0044424,GO:0044444,GO:0044464,GO:0046483,GO:0051186,GO:0051188,GO:0051189,GO:0071704,GO:0090407,GO:1901360,GO:…
contig_1036_np1212_2637	H	moaC	Catalyzes the conversion of (8S)-3',8-cyclo-7,8- dihydroguanosine 5'-triphosphate to cyclic pyranopterin monophosphate (cPMP)	ko:K03637	MoaC,ThiS	-
contig_1036_np1212_2639	H	moeA	molybdopterin	ko:K03750	MoCF_biosynth,MoeA_C,MoeA_N	-
contig_1036_np1212_2660	H	hemL	Glutamate-1-semialdehyde aminotransferase	ko:K01845	Aminotran_3	-
contig_1036_np1212_2793	H	pdxA_2	Belongs to the PdxA family	ko:K00097	PdxA	-
contig_1036_np1212_2848	H	pdxH	Catalyzes the oxidation of either pyridoxine 5'- phosphate (PNP) or pyridoxamine 5'-phosphate (PMP) into pyridoxal 5'-phosphate (PLP)	ko:K00275	PNP_phzG_C,Putative_PNPOx	-
contig_1036_np1212_2859	H	lipA	Catalyzes the radical-mediated insertion of two sulfur atoms into the C-6 and C-8 positions of the octanoyl moiety bound to the lipoyl domains of lipoate-dependent enzymes, thereby converting the octanoylated domains into lipoylated derivatives	ko:K03644	LIAS_N,Radical_SAM	-
contig_1036_np1212_2860	H	lipB	Catalyzes the transfer of endogenously produced octanoic acid from octanoyl-acyl-carrier-protein onto the lipoyl domains of lipoate-dependent enzymes. Lipoyl-ACP can also act as a substrate although octanoyl-ACP is likely to be the physiological substrate	ko:K03801	BPL_LplA_LipB	-
contig_1036_np1212_2870	H	nadD	Catalyzes the reversible adenylation of nicotinate mononucleotide (NaMN) to nicotinic acid adenine dinucleotide (NaAD)	ko:K00969,ko:K01488	CTP_transf_like	GO:0000309,GO:0003674,GO:0003824,GO:0004515,GO:0006082,GO:0006139,GO:0006520,GO:0006531,GO:0006725,GO:0006732,GO:0006733,GO:0006753,GO:0006793,GO:0006796,GO:0006807,GO:0008150,GO:0008152,GO:0009058,GO:0009066,GO:0009108,GO:0009117,GO:0009165,GO:0009435,GO:0009987,GO:0016740,GO:0016772,GO:0016779,GO:0018130,GO:0019355,GO:0019359,GO:0019362,GO:0019363,GO:0019365,GO:0019438,GO:0019637,GO:0019674,GO:…
contig_1036_np1212_2896	H	-	Belongs to the 5-formyltetrahydrofolate cyclo-ligase family	ko:K01934	5-FTHF_cyc-lig	-
contig_1036_np1212_2900	H	hemC	Tetrapolymerization of the monopyrrole PBG into the hydroxymethylbilane pre-uroporphyrinogen in several discrete steps	ko:K01749	Porphobil_deam,Porphobil_deamC	-
contig_1036_np1212_2901	H	hemD	synthase	ko:K01719	HEM4	-
contig_1036_np1212_2902	H	hemX	enzyme of heme biosynthesis	ko:K02496	HemX	-
contig_1036_np1212_2903	H	hemY	biosynthesis protein HemY	ko:K02498	HemY_N,TPR_7	-
contig_1036_np1212_2937	H	ispA	Belongs to the FPP GGPP synthase family	ko:K00795,ko:K13789	polyprenyl_synt	-
contig_1036_np1212_2938	H	dxs	Catalyzes the acyloin condensation reaction between C atoms 2 and 3 of pyruvate and glyceraldehyde 3-phosphate to yield 1-deoxy-D-xylulose-5-phosphate (DXP)	ko:K01662	DXP_synthase_N,Transket_pyr,Transketolase_C	-
contig_1036_np1212_2939	H	ribA	Catalyzes the conversion of GTP to 2,5-diamino-6- ribosylamino-4(3H)-pyrimidinone 5'-phosphate (DARP), formate and pyrophosphate	ko:K01497	GTP_cyclohydro2	GO:0003674,GO:0003824,GO:0003933,GO:0003935,GO:0006766,GO:0006767,GO:0006771,GO:0006807,GO:0008150,GO:0008152,GO:0009058,GO:0009110,GO:0009231,GO:0009987,GO:0016787,GO:0016810,GO:0016814,GO:0017144,GO:0018130,GO:0019238,GO:0034641,GO:0042364,GO:0042726,GO:0042727,GO:0044237,GO:0044249,GO:0044271,GO:0044281,GO:0044283,GO:0046483,GO:0071704,GO:1901360,GO:1901362,GO:1901564,GO:1901566,GO:1901576
contig_1036_np1212_2941	H	thiL	Catalyzes the ATP-dependent phosphorylation of thiamine- monophosphate (TMP) to form thiamine-pyrophosphate (TPP), the active form of vitamin B1	ko:K00946	AIRS,AIRS_C	-
contig_1036_np1212_2943	H	ribH	Catalyzes the formation of 6,7-dimethyl-8- ribityllumazine by condensation of 5-amino-6-(D- ribitylamino)uracil with 3,4-dihydroxy-2-butanone 4-phosphate. This is the penultimate step in the biosynthesis of riboflavin	ko:K00794	DMRL_synthase	-
contig_1036_np1212_2944	H	ribB	Catalyzes the conversion of D-ribulose 5-phosphate to formate and 3,4-dihydroxy-2-butanone 4-phosphate	ko:K14652	DHBP_synthase,GTP_cyclohydro2	-
contig_1036_np1212_2945	H	ribE	Riboflavin synthase	ko:K00793	Lum_binding	-
contig_1036_np1212_2946	H	ribD	Converts 2,5-diamino-6-(ribosylamino)-4(3h)-pyrimidinone 5'-phosphate into 5-amino-6-(ribosylamino)-2,4(1h,3h)- pyrimidinedione 5'-phosphate	ko:K11752	RibD_C,dCMP_cyt_deam_1	-
contig_1036_np1212_3061	H	folA	Key enzyme in folate metabolism. Catalyzes an essential reaction for de novo glycine and purine synthesis, and for DNA precursor synthesis	ko:K00287	DHFR_1	-
contig_1036_np1212_3172	H	dlpA	methyltransferase	-	RraA-like	-
contig_1036_np1212_3200	H	-	Elongator protein 3, MiaB family, Radical SAM	ko:K11779	CofC,Radical_SAM	-
contig_1036_np1212_3201	H	-	Elongator protein 3, MiaB family, Radical SAM	ko:K11779	CofC,Radical_SAM	-
contig_1036_np1212_3203	H	-	2-phospho-L-lactate guanylyltransferase	ko:K14941	CofC	-
contig_1036_np1212_3223	H	hldE	Catalyzes the ADP transfer from ATP to D-glycero-beta-D- manno-heptose 1-phosphate, yielding ADP-D-glycero-beta-D-manno- heptose	ko:K03272	CTP_transf_like,PfkB	-
contig_1036_np1212_3267	H	-	Catalyzes both the ATP-dependent activation of exogenously supplied lipoate to lipoyl-AMP and the transfer of the activated lipoyl onto the lipoyl domains of lipoate-dependent enzymes	ko:K03800	BPL_LplA_LipB,Lip_prot_lig_C	-
contig_1036_np1212_3357	H	coaD	Reversibly transfers an adenylyl group from ATP to 4'- phosphopantetheine, yielding dephospho-CoA (dPCoA) and pyrophosphate	ko:K00954	CTP_transf_like	-
contig_1036_np1212_3371	H	hemF	Involved in the heme biosynthesis. Catalyzes the aerobic oxidative decarboxylation of propionate groups of rings A and B of coproporphyrinogen-III to yield the vinyl groups in protoporphyrinogen-IX	ko:K00228	Coprogen_oxidas	GO:0003674,GO:0005488,GO:0005515,GO:0042802,GO:0042803,GO:0046983
contig_1036_np1212_3448	H	menA	Belongs to the MenA family. Type 1 subfamily	ko:K02548	UbiA	GO:0000287,GO:0002094,GO:0003674,GO:0003824,GO:0004659,GO:0005488,GO:0005575,GO:0005623,GO:0005886,GO:0006732,GO:0006733,GO:0006743,GO:0006744,GO:0006766,GO:0006775,GO:0008150,GO:0008152,GO:0009058,GO:0009108,GO:0009110,GO:0009233,GO:0009234,GO:0009987,GO:0016020,GO:0016740,GO:0016765,GO:0032194,GO:0042180,GO:0042181,GO:0042362,GO:0042371,GO:0042373,GO:0043167,GO:0043169,GO:0044237,GO:0044249,GO:…
contig_1036_np1212_3518	H	ubiA	Catalyzes the prenylation of para-hydroxybenzoate (PHB) with an all-trans polyprenyl group. Mediates the second step in the final reaction sequence of ubiquinone-8 (UQ-8) biosynthesis, which is the condensation of the polyisoprenoid side chain with PHB, generating the first membrane-bound Q intermediate 3- octaprenyl-4-hydroxybenzoate	ko:K03179	UbiA	-
contig_1036_np1212_3519	H	ubiC	Removes the pyruvyl group from chorismate, with concomitant aromatization of the ring, to provide 4- hydroxybenzoate (4HB) for the ubiquinone pathway	ko:K03181	Chor_lyase	-
contig_1036_np1212_3683	H	-	Involved in the biosynthesis of porphyrin-containing compound	-	HemN_C,Radical_SAM	-
contig_1036_np1212_3774	H	gshA	Belongs to the glutamate--cysteine ligase type 1 family. Type 1 subfamily	ko:K01919	Glu_cys_ligase	-
contig_1036_np1212_3780	H	-	Nicotinate phosphoribosyltransferase (NAPRTase) family	ko:K03462	NAPRTase	-
contig_1036_np1212_3876	H	hemE	Catalyzes the decarboxylation of four acetate groups of uroporphyrinogen-III to yield coproporphyrinogen-III	ko:K01599	URO-D	-
contig_1036_np1212_3961	H	thiD	Phosphomethylpyrimidine kinase	ko:K00941	Phos_pyr_kin	-
contig_1036_np1212_4058	H	-	Methyltransferase, FkbM family protein	-	Methyltransf_21	-
contig_1036_np1212_4069	H	-	COG0457 FOG TPR repeat	-	TPR_14,TPR_16,TPR_19,TPR_6,TPR_8	-
contig_1036_np1212_4070	H	hemA	Catalyzes the NADPH-dependent reduction of glutamyl- tRNA(Glu) to glutamate 1-semialdehyde (GSA)	ko:K02492	GlutR_N,GlutR_dimer,Shikimate_DH	-
contig_1036_np1212_4073	H	moeB	COG0476 Dinucleotide-utilizing enzymes involved in molybdopterin and thiamine biosynthesis family 2	ko:K21029	ThiF	-
contig_1036_np1212_4089	H	kbl	Catalyzes the cleavage of 2-amino-3-ketobutyrate to glycine and acetyl-CoA	ko:K00639	Aminotran_1_2	-
contig_1036_np1212_1969	HJ	-	GNAT family acetyltransferase	ko:K03802	Acetyltransf_1,Mur_ligase_C,Mur_ligase_M,RimK	-
contig_1036_np1212_1462	HJM	cphA	Carbamoyl-phosphate synthase L chain, ATP binding domain	ko:K03802	CPSase_L_D2,Mur_ligase_C,Mur_ligase_M,RimK	-
contig_1036_np1212_3060	HK	birA	Acts both as a biotin-- acetyl-CoA-carboxylase ligase and a biotin-operon repressor. In the presence of ATP, BirA activates biotin to form the BirA-biotinyl-5'-adenylate (BirA-bio- 5'-AMP or holoBirA) complex. HoloBirA can either transfer the biotinyl moiety to the biotin carboxyl carrier protein (BCCP) subunit of acetyl-CoA carboxylase, or bind to the biotin operator site and inhibit transcripti…	ko:K03524	BPL_C,BPL_LplA_LipB,HTH_11	-
contig_1036_np1212_1748	HL	mutT	NUDIX domain	ko:K03574	NUDIX,NUDIX_4,TMP-TENI	GO:0000287,GO:0003674,GO:0003824,GO:0005488,GO:0006139,GO:0006259,GO:0006281,GO:0006725,GO:0006807,GO:0006950,GO:0006974,GO:0008150,GO:0008152,GO:0008413,GO:0009987,GO:0016462,GO:0016787,GO:0016817,GO:0016818,GO:0017110,GO:0030145,GO:0033554,GO:0034641,GO:0035539,GO:0043167,GO:0043169,GO:0043170,GO:0044237,GO:0044238,GO:0044260,GO:0044715,GO:0044716,GO:0046483,GO:0046872,GO:0046914,GO:0047429,GO:…
contig_1036_np1212_1137	HP	-	ABC-type cobalamin Fe3 -siderophores transport systems, ATPase components	ko:K02013	ABC_tran	-
contig_1036_np1212_1528	HP	-	ABC-type cobalamin Fe3 -siderophores transport systems, ATPase components	ko:K02013	ABC_tran	-
contig_1036_np1212_2741	HP	-	COGs COG1120 ABC-type cobalamin Fe3 -siderophores transport systems ATPase components	ko:K02013	ABC_tran	-
contig_1036_np1212_3563	HP	-	ATPases associated with a variety of cellular activities	ko:K02013	ABC_tran	-
contig_1036_np1212_3896	HP	yusV	ABC transporter	ko:K02013	ABC_tran	-
contig_1036_np1212_52	I	fabA	Necessary for the introduction of cis unsaturation into fatty acids. Catalyzes the dehydration of (3R)-3-hydroxydecanoyl- ACP to E-(2)-decenoyl-ACP and then its isomerization to Z-(3)- decenoyl-ACP. Can catalyze the dehydratase reaction for beta- hydroxyacyl-ACPs with saturated chain lengths up to 16 0, being most active on intermediate chain length	ko:K01716	FabA	-
contig_1036_np1212_133	I	atoB	Belongs to the thiolase family	ko:K00626	Thiolase_C,Thiolase_N	-
contig_1036_np1212_134	I	atoB	Belongs to the thiolase family	ko:K00626	Thiolase_C,Thiolase_N	-
contig_1036_np1212_276	I	-	Thioesterase superfamily	-	4HBT	-
contig_1036_np1212_292	I	-	Hydroxymethylglutaryl-coenzyme A reductase	-	HMG-CoA_red	-
contig_1036_np1212_294	I	-	Hydroxymethylglutaryl-coenzyme A synthase N terminal	-	HMG_CoA_synt_C,HMG_CoA_synt_N	-
contig_1036_np1212_295	I	-	COG1577 Mevalonate kinase	ko:K00869	GHMP_kinases_N	-
contig_1036_np1212_296	I	-	GHMP kinases C terminal	-	GHMP_kinases_C,GHMP_kinases_N	-
contig_1036_np1212_297	I	-	GHMP kinases N terminal domain	-	GHMP_kinases_N	-
contig_1036_np1212_375	I	-	SbmA/BacA-like family	ko:K17938	SbmA_BacA	-
contig_1036_np1212_516	I	psd	Belongs to the phosphatidylserine decarboxylase family. PSD-B subfamily. Prokaryotic type I sub-subfamily	ko:K01613	PS_Dcarbxylase	-
contig_1036_np1212_540	I	yhaE	COG2084 3-hydroxyisobutyrate dehydrogenase and related beta-hydroxyacid dehydrogenases	ko:K00042	NAD_binding_11,NAD_binding_2	-
contig_1036_np1212_591	I	accC	Biotin carboxylase	ko:K01961	Biotin_carb_C,Biotin_carb_N,CPSase_L_D2	GO:0003674,GO:0003824,GO:0004075,GO:0005575,GO:0005622,GO:0005623,GO:0005737,GO:0005829,GO:0006082,GO:0006629,GO:0006631,GO:0006633,GO:0008150,GO:0008152,GO:0008610,GO:0009058,GO:0009889,GO:0009890,GO:0009892,GO:0009987,GO:0010565,GO:0016053,GO:0016874,GO:0016879,GO:0019216,GO:0019217,GO:0019222,GO:0019752,GO:0031323,GO:0031324,GO:0031326,GO:0031327,GO:0032787,GO:0042304,GO:0043436,GO:0044237,GO:…
contig_1036_np1212_592	I	accB	first, biotin carboxylase catalyzes the carboxylation of the carrier protein and then the transcarboxylase transfers the carboxyl group to form malonyl-CoA	ko:K02160	Biotin_lipoyl	-
contig_1036_np1212_769	I	paaG	Enoyl-CoA hydratase	ko:K15866	ECH_1	GO:0003674,GO:0003824,GO:0004300,GO:0005488,GO:0005515,GO:0006082,GO:0006629,GO:0006631,GO:0006635,GO:0006725,GO:0006805,GO:0008150,GO:0008152,GO:0009056,GO:0009062,GO:0009404,GO:0009407,GO:0009410,GO:0009636,GO:0009850,GO:0009852,GO:0009987,GO:0010124,GO:0010817,GO:0016042,GO:0016054,GO:0016829,GO:0016835,GO:0016836,GO:0016853,GO:0019395,GO:0019439,GO:0019748,GO:0019752,GO:0030258,GO:0032787,GO:…
contig_1036_np1212_771	I	paaJ	Catalyzes the final step of fatty acid oxidation in which acetyl-CoA is released and the CoA ester of a fatty acid two carbons shorter is formed	ko:K00626,ko:K00632,ko:K02615,ko:K07823	Thiolase_C,Thiolase_N	GO:0003674,GO:0003824,GO:0006082,GO:0006725,GO:0006805,GO:0006950,GO:0006974,GO:0008150,GO:0008152,GO:0009056,GO:0009404,GO:0009407,GO:0009410,GO:0009636,GO:0009850,GO:0009852,GO:0009987,GO:0010124,GO:0010817,GO:0016054,GO:0016740,GO:0016746,GO:0016747,GO:0019439,GO:0019748,GO:0019752,GO:0032787,GO:0033554,GO:0033812,GO:0042178,GO:0042221,GO:0042445,GO:0042447,GO:0042537,GO:0043436,GO:0044237,GO:…
contig_1036_np1212_779	I	-	Belongs to the enoyl-CoA hydratase isomerase family	ko:K07516	3HCDH,3HCDH_N,ECH_1	-
contig_1036_np1212_824	I	-	Belongs to the CDP-alcohol phosphatidyltransferase class-I family	-	CDP-OH_P_transf	-
contig_1036_np1212_873	I	gpsA	Glycerol-3-phosphate dehydrogenase	ko:K00057	NAD_Gly3P_dh_C,NAD_Gly3P_dh_N	-
contig_1036_np1212_950	I	-	hydrolase	ko:K10806	4HBT	-
contig_1036_np1212_969	I	-	N-terminal half of MaoC dehydratase	-	MaoC_dehydratas	-
contig_1036_np1212_981	I	plsB	Belongs to the GPAT DAPAT family	ko:K00631	Acyltransferase	-
contig_1036_np1212_1064	I	fabD	malonyl CoA-acyl carrier protein transacylase	ko:K00645	Acyl_transf_1	-
contig_1036_np1212_1067	I	fabF	Catalyzes the condensation reaction of fatty acid synthesis by the addition to an acyl acceptor of two carbons from malonyl-ACP	ko:K09458	Ketoacyl-synt_C,ketoacyl-synt	-
contig_1036_np1212_1085	I	-	Acetyl propionyl-CoA carboxylase, alpha subunit	ko:K01968	Biotin_carb_C,Biotin_carb_N,Biotin_lipoyl,CPSase_L_D2	-
contig_1036_np1212_1086	I	liuC	COG1024 Enoyl-CoA hydratase carnithine racemase	ko:K13766	ECH_1	-
contig_1036_np1212_1087	I	-	Acetyl-CoA carboxylase, carboxyltransferase component (subunits alpha and beta	ko:K01969	Carboxyl_trans	-
contig_1036_np1212_1088	I	ivd	Catalyzes the formation of 3-methylbut-2-enoyl CoA from 3-methylbutanoyl CoA	ko:K00253	Acyl-CoA_dh_1,Acyl-CoA_dh_M,Acyl-CoA_dh_N	-
contig_1036_np1212_1117	I	fabV	Involved in the final reduction of the elongation cycle of fatty acid synthesis (FAS II). Catalyzes the reduction of a carbon-carbon double bond in an enoyl moiety that is covalently linked to an acyl carrier protein (ACP)	ko:K00209	Eno-Rase_FAD_bd,Eno-Rase_NADH_b,Enoyl_reductase	-
contig_1036_np1212_1148	I	-	AMP-binding enzyme	ko:K01897	AMP-binding	-
contig_1036_np1212_1181	I	-	Acyl-CoA dehydrogenase N terminal	ko:K00248	Acyl-CoA_dh_1,Acyl-CoA_dh_C,Acyl-CoA_dh_M,Acyl-CoA_dh_N,AcylCoA_DH_N	-
contig_1036_np1212_1182	I	fadB	3-hydroxyacyl-coa dehydrogenase	ko:K01782,ko:K07516	3HCDH,3HCDH_N,ECH_1,ECH_2	-
contig_1036_np1212_1183	I	fadB	3-hydroxyacyl-coa dehydrogenase	ko:K01782,ko:K07516	3HCDH,3HCDH_N,ECH_1,ECH_2	-
contig_1036_np1212_1184	I	fadA	Thiolase, C-terminal domain	ko:K00632	Thiolase_C,Thiolase_N	-
contig_1036_np1212_1186	I	-	long-chain fatty acid transport protein	ko:K06076	Toluene_X	-
contig_1036_np1212_1190	I	scoB	transferase	ko:K01029	CoA_trans	-
contig_1036_np1212_1191	I	scoA	transferase	ko:K01027,ko:K01028	CoA_trans	-
contig_1036_np1212_1226	I	-	COG0671 Membrane-associated phospholipid phosphatase	-	PAP2	-
contig_1036_np1212_1237	I	-	acyl-CoA dehydrogenase	-	Acyl-CoA_dh_1,Acyl-CoA_dh_M,Acyl-CoA_dh_N	-
contig_1036_np1212_1238	I	-	Belongs to the enoyl-CoA hydratase isomerase family	ko:K08299	ECH_1	-
contig_1036_np1212_1239	I	-	enoyl-CoA hydratase	-	ECH_2	-
contig_1036_np1212_1240	I	mmsB	Belongs to the 3-hydroxyisobutyrate dehydrogenase family	ko:K00020	NAD_binding_11,NAD_binding_2	-
contig_1036_np1212_1246	I	-	Acetyl-coenzyme A synthetase N-terminus	ko:K01908	ACAS_N,AMP-binding,AMP-binding_C	-
contig_1036_np1212_1371	I	accD	Component of the acetyl coenzyme A carboxylase (ACC) complex. Biotin carboxylase (BC) catalyzes the carboxylation of biotin on its carrier protein (BCCP) and then the CO(2) group is transferred by the transcarboxylase to acetyl-CoA to form malonyl- CoA	ko:K01963	Carboxyl_trans	-
contig_1036_np1212_1424	I	pssA	Phospholipase D. Active site motifs.	ko:K00998	PLDc_2,Regulator_TrmB	GO:0003674,GO:0003824,GO:0003882,GO:0005575,GO:0005622,GO:0005623,GO:0005737,GO:0005829,GO:0005886,GO:0016020,GO:0016740,GO:0016772,GO:0016780,GO:0017169,GO:0044424,GO:0044444,GO:0044464,GO:0071944
contig_1036_np1212_1635	I	plsC	Belongs to the 1-acyl-sn-glycerol-3-phosphate acyltransferase family	ko:K00655	Acyltransferase	GO:0003674,GO:0003824,GO:0003841,GO:0005575,GO:0005623,GO:0005886,GO:0006629,GO:0006644,GO:0006650,GO:0006793,GO:0006796,GO:0008150,GO:0008152,GO:0008374,GO:0008610,GO:0008654,GO:0009058,GO:0009987,GO:0016020,GO:0016411,GO:0016740,GO:0016746,GO:0016747,GO:0019637,GO:0042171,GO:0044237,GO:0044238,GO:0044249,GO:0044255,GO:0044464,GO:0045017,GO:0046474,GO:0046486,GO:0071617,GO:0071704,GO:0071944,GO:…
contig_1036_np1212_1650	I	-	Acyl-carrier-protein s-malonyltransferase	-	-	-
contig_1036_np1212_1659	I	pgsA	Belongs to the CDP-alcohol phosphatidyltransferase class-I family	ko:K00995,ko:K08744	CDP-OH_P_transf	-
contig_1036_np1212_1724	I	-	Acetyl-CoA dehydrogenase C-terminal like	ko:K20035	Acyl-CoA_dh_1,Acyl-CoA_dh_C,Acyl-CoA_dh_M,Acyl-CoA_dh_N,AcylCoA_DH_N	-
contig_1036_np1212_1725	I	-	acyl-CoA dehydrogenase	-	Acyl-CoA_dh_1,Acyl-CoA_dh_M,Acyl-CoA_dh_N	-
contig_1036_np1212_1726	I	-	Catalyzes the synthesis of acetoacetyl coenzyme A from two molecules of acetyl coenzyme A. It can also act as a thiolase, catalyzing the reverse reaction and generating two-carbon units from the four-carbon product of fatty acid oxidation	ko:K00626	Thiolase_C,Thiolase_N	-
contig_1036_np1212_1735	I	-	Sterol desaturase	-	FA_hydroxylase	-
contig_1036_np1212_1818	I	acpS	Transfers the 4'-phosphopantetheine moiety from coenzyme A to a Ser of acyl-carrier-protein	ko:K00997	ACPS	-
contig_1036_np1212_1827	I	-	sterol carrier protein	-	SCP2	-
contig_1036_np1212_1987	I	MA20_38120	COG0365 Acyl-coenzyme A synthetases AMP-(fatty) acid ligases	ko:K08295	AMP-binding,AMP-binding_C	-
contig_1036_np1212_1988	I	-	acyl-CoA dehydrogenase	ko:K00249	Acyl-CoA_dh_1,Acyl-CoA_dh_M,Acyl-CoA_dh_N	-
contig_1036_np1212_1989	I	MA20_38145	Belongs to the enoyl-CoA hydratase isomerase family	-	ECH_1	-
contig_1036_np1212_1990	I	MA20_38145	Belongs to the enoyl-CoA hydratase isomerase family	-	ECH_1	-
contig_1036_np1212_1994	I	-	acyl-CoA dehydrogenase	ko:K00252	Acyl-CoA_dh_1,Acyl-CoA_dh_M,Acyl-CoA_dh_N	-
contig_1036_np1212_1995	I	-	COG0657 Esterase lipase	ko:K01432	Abhydrolase_3,Abhydrolase_6	-
contig_1036_np1212_2291	I	-	Catalyzes the NAD( )-dependent oxidation of L-carnitine to 3-dehydrocarnitine	ko:K17735	3HCDH,3HCDH_N	-
contig_1036_np1212_2534	I	bioH	The physiological role of BioH is to remove the methyl group introduced by BioC when the pimeloyl moiety is complete. It allows to synthesize pimeloyl-ACP via the fatty acid synthetic pathway through the hydrolysis of the ester bonds of pimeloyl-ACP esters	ko:K02170	Abhydrolase_1,Abhydrolase_6	-
contig_1036_np1212_2599	I	-	COG2084 3-hydroxyisobutyrate dehydrogenase and related beta-hydroxyacid dehydrogenases	ko:K00020	NAD_binding_11,NAD_binding_2	-
contig_1036_np1212_2602	I	-	Biotin carboxylase	-	CPSase_L_D2	-
contig_1036_np1212_2635	I	plsC	1-acyl-sn-glycerol-3-phosphate acyltransferase	ko:K00655	Acyltransferase	-
contig_1036_np1212_2638	I	-	Phosphate acyltransferases	-	Acyltransferase	-
contig_1036_np1212_2676	I	accA	Component of the acetyl coenzyme A carboxylase (ACC) complex. First, biotin carboxylase catalyzes the carboxylation of biotin on its carrier protein (BCCP) and then the CO(2) group is transferred by the carboxyltransferase to acetyl-CoA to form malonyl-CoA	ko:K01962	ACCA	-
contig_1036_np1212_2681	I	fabZ	Involved in unsaturated fatty acids biosynthesis. Catalyzes the dehydration of short chain beta-hydroxyacyl-ACPs and long chain saturated and unsaturated beta-hydroxyacyl-ACPs	ko:K02372	FabA	-
contig_1036_np1212_2685	I	cdsA	Belongs to the CDS family	ko:K00981	CTP_transf_1	-
contig_1036_np1212_2686	I	uppS	Catalyzes the sequential condensation of isopentenyl diphosphate (IPP) with (2E,6E)-farnesyl diphosphate (E,E-FPP) to yield (2Z,6Z,10Z,14Z,18Z,22Z,26Z,30Z,34E,38E)-undecaprenyl diphosphate (di-trans,octa-cis-UPP). UPP is the precursor of glycosyl carrier lipid in the biosynthesis of bacterial cell wall polysaccharide components such as peptidoglycan and lipopolysaccharide	ko:K00806	Prenyltransf	-
contig_1036_np1212_2701	I	-	Cyclase dehydrase	-	Polyketide_cyc	-
contig_1036_np1212_2737	I	-	Lipase (class 3)	-	Lipase_3	-
contig_1036_np1212_2751	I	-	sterol carrier protein	-	SCP2	-
contig_1036_np1212_2918	I	-	Fatty acid desaturase	-	FA_desaturase	-
contig_1036_np1212_2919	I	-	cobalamin binding	ko:K01846,ko:K19268	B12-binding	-
contig_1036_np1212_2940	I	pgpA	Lipid phosphatase which dephosphorylates phosphatidylglycerophosphate (PGP) to phosphatidylglycerol (PG)	ko:K01095	PgpA	-
contig_1036_np1212_2956	I	ynbA	CDP-alcohol phosphatidyltransferase	ko:K00995	CDP-OH_P_transf	GO:0005575,GO:0005623,GO:0005886,GO:0016020,GO:0044464,GO:0071944
contig_1036_np1212_2957	I	ynbC	Putative methyltransferase	-	Hydrolase_4,Methyltransf_20	GO:0003674,GO:0003824,GO:0005575,GO:0006629,GO:0008150,GO:0008152,GO:0016020,GO:0016298,GO:0016787,GO:0016788,GO:0044238,GO:0071704
contig_1036_np1212_2958	I	ynbC	Putative methyltransferase	-	Hydrolase_4,Methyltransf_20	GO:0003674,GO:0003824,GO:0005575,GO:0006629,GO:0008150,GO:0008152,GO:0016020,GO:0016298,GO:0016787,GO:0016788,GO:0044238,GO:0071704
contig_1036_np1212_3159	I	paaF	Belongs to the enoyl-CoA hydratase isomerase family	ko:K01715	ECH_1	-
contig_1036_np1212_3160	I	paaH	Dehydrogenase	ko:K00074	3HCDH,3HCDH_N	-
contig_1036_np1212_3234	I	-	SCP-2 sterol transfer family	-	SCP2	-
contig_1036_np1212_3521	I	-	COG3000 Sterol desaturase	ko:K00227	FA_hydroxylase	-
contig_1036_np1212_3532	I	-	Thioesterase superfamily	-	4HBT	-
contig_1036_np1212_3596	I	mvaA	Hydroxymethylglutaryl-coenzyme A reductase	ko:K00054	HMG-CoA_red	-
contig_1036_np1212_3760	I	-	Fatty acid desaturase	-	FA_desaturase	-
contig_1036_np1212_3895	I	-	carboxylic ester hydrolase activity	ko:K14205	Abhydrolase_1,Abhydrolase_6	-
contig_1036_np1212_3940	I	acsA	Catalyzes the conversion of acetate into acetyl-CoA (AcCoA), an essential intermediate at the junction of anabolic and catabolic pathways. AcsA undergoes a two-step reaction. In the first half reaction, AcsA combines acetate with ATP to form acetyl-adenylate (AcAMP) intermediate. In the second half reaction, it can then transfer the acetyl group from AcAMP to the sulfhydryl group of CoA, forming …	ko:K01895	ACAS_N,AMP-binding,AMP-binding_C	GO:0003674,GO:0003824,GO:0003987,GO:0005575,GO:0005622,GO:0005623,GO:0005737,GO:0005829,GO:0006082,GO:0006083,GO:0006084,GO:0006085,GO:0006139,GO:0006163,GO:0006164,GO:0006464,GO:0006473,GO:0006476,GO:0006637,GO:0006725,GO:0006732,GO:0006753,GO:0006790,GO:0006793,GO:0006796,GO:0006807,GO:0008150,GO:0008152,GO:0009056,GO:0009058,GO:0009108,GO:0009117,GO:0009150,GO:0009152,GO:0009165,GO:0009259,GO:…
contig_1036_np1212_51	IQ	fabB	Belongs to the beta-ketoacyl-ACP synthases family	ko:K00647	Ketoacyl-synt_C,ketoacyl-synt	GO:0003674,GO:0003824,GO:0004312,GO:0004315,GO:0005575,GO:0005622,GO:0005623,GO:0005737,GO:0005829,GO:0006082,GO:0006629,GO:0006631,GO:0006633,GO:0008150,GO:0008152,GO:0008610,GO:0009058,GO:0009987,GO:0016053,GO:0016740,GO:0016746,GO:0016747,GO:0019752,GO:0032787,GO:0043436,GO:0044237,GO:0044238,GO:0044249,GO:0044255,GO:0044281,GO:0044283,GO:0044424,GO:0044444,GO:0044464,GO:0046394,GO:0071704,GO:…
contig_1036_np1212_464	IQ	-	reductase	-	adh_short	-
contig_1036_np1212_1065	IQ	fabG	Catalyzes the first of the two reduction steps in the elongation cycle of fatty acid synthesis	ko:K00059	adh_short_C2	-
contig_1036_np1212_1066	IQ	acpP	Carrier of the growing fatty acid chain in fatty acid biosynthesis	ko:K02078	PP-binding	GO:0000035,GO:0000036,GO:0003674,GO:0005488,GO:0005575,GO:0005622,GO:0005623,GO:0005737,GO:0005829,GO:0005975,GO:0006082,GO:0006629,GO:0006631,GO:0006633,GO:0006643,GO:0006644,GO:0006664,GO:0006793,GO:0006796,GO:0008150,GO:0008152,GO:0008289,GO:0008610,GO:0008654,GO:0009058,GO:0009245,GO:0009247,GO:0009311,GO:0009312,GO:0009987,GO:0016051,GO:0016053,GO:0019637,GO:0019752,GO:0019842,GO:0031177,GO:…
contig_1036_np1212_1083	IQ	acs	COG0318 Acyl-CoA synthetases (AMP-forming) AMP-acid ligases II	ko:K00666	AMP-binding,AMP-binding_C	-
contig_1036_np1212_1179	IQ	-	Enoyl-(Acyl carrier protein) reductase	ko:K13775	adh_short,adh_short_C2	-
contig_1036_np1212_1193	IQ	bdhA	Belongs to the short-chain dehydrogenases reductases (SDR) family	ko:K00019	adh_short_C2	-
contig_1036_np1212_1194	IQ	-	KR domain	ko:K00019	adh_short_C2	-
contig_1036_np1212_1670	IQ	-	COG1028 Dehydrogenases with different specificities (related to short-chain alcohol dehydrogenases)	-	adh_short_C2	-
contig_1036_np1212_1758	IQ	ygfF	KR domain	-	adh_short_C2	-
contig_1036_np1212_1919	IQ	-	Dehydrogenases with different specificities (related to short-chain alcohol dehydrogenases)	ko:K18335	adh_short_C2	-
contig_1036_np1212_1992	IQ	bdh	Belongs to the short-chain dehydrogenases reductases (SDR) family	-	adh_short,adh_short_C2	-
contig_1036_np1212_2048	IQ	-	3-beta hydroxysteroid dehydrogenase/isomerase family	-	adh_short_C2	-
contig_1036_np1212_2234	IQ	-	Short-chain dehydrogenase reductase (SDR)	-	adh_short_C2	-
contig_1036_np1212_2320	IQ	-	AMP-binding enzyme C-terminal domain	-	AMP-binding,AMP-binding_C	-
contig_1036_np1212_2391	IQ	-	Short-chain dehydrogenase reductase sdr	ko:K22185,ko:K22215	adh_short_C2	-
contig_1036_np1212_2750	IQ	fadD	involved in the beta-oxidation of n-alkanoic and n-phenylalkanoic acids	ko:K01897	AMP-binding,AMP-binding_C	-
contig_1036_np1212_2982	IQ	-	Belongs to the beta-ketoacyl-ACP synthases family	ko:K18473	Ketoacyl-synt_C,ketoacyl-synt	-
contig_1036_np1212_3467	IQ	-	Tripartite tricarboxylate transporter TctA family	-	TctA	-
contig_1036_np1212_3587	IQ	-	Dehydrogenases with different specificities (Related to short-chain alcohol dehydrogenases)	ko:K00059,ko:K18335	adh_short_C2	-
contig_1036_np1212_3588	IQ	-	Dehydrogenases with different specificities (Related to short-chain alcohol dehydrogenases)	ko:K00059,ko:K18335	adh_short_C2	-
contig_1036_np1212_19	J	hslR	Belongs to the HSP15 family	ko:K04762	S4	-
contig_1036_np1212_33	J	rsmE	Specifically methylates the N3 position of the uracil ring of uridine 1498 (m3U1498) in 16S rRNA. Acts on the fully assembled 30S ribosomal subunit	ko:K09761	Methyltrans_RNA	-
contig_1036_np1212_47	J	argS	Arginyl-tRNA synthetase	ko:K01887	Arg_tRNA_synt_N,DALR_1,tRNA-synt_1d	GO:0003674,GO:0003824,GO:0004812,GO:0004814,GO:0005575,GO:0005622,GO:0005623,GO:0005737,GO:0006082,GO:0006139,GO:0006399,GO:0006412,GO:0006418,GO:0006420,GO:0006518,GO:0006520,GO:0006725,GO:0006807,GO:0008150,GO:0008152,GO:0009058,GO:0009059,GO:0009987,GO:0010467,GO:0016070,GO:0016874,GO:0016875,GO:0019538,GO:0019752,GO:0034641,GO:0034645,GO:0034660,GO:0043038,GO:0043039,GO:0043043,GO:0043170,GO:…
contig_1036_np1212_49	J	rpmE	Binds the 23S rRNA	ko:K02909	Ribosomal_L31	-
contig_1036_np1212_54	J	rplU	This protein binds to 23S rRNA in the presence of protein L20	ko:K02888	Ribosomal_L21p	GO:0003674,GO:0003735,GO:0005198,GO:0005575,GO:0005622,GO:0005623,GO:0005737,GO:0005829,GO:0005840,GO:0006412,GO:0006518,GO:0006807,GO:0008150,GO:0008152,GO:0009058,GO:0009059,GO:0009987,GO:0010467,GO:0015934,GO:0019538,GO:0022625,GO:0022626,GO:0032991,GO:0034641,GO:0034645,GO:0043043,GO:0043170,GO:0043226,GO:0043228,GO:0043229,GO:0043232,GO:0043603,GO:0043604,GO:0044237,GO:0044238,GO:0044249,GO:…
contig_1036_np1212_55	J	rpmA	Belongs to the bacterial ribosomal protein bL27 family	ko:K02899	Ribosomal_L27	-
contig_1036_np1212_59	J	rpsT	Binds directly to 16S ribosomal RNA	ko:K02968	Ribosomal_S20p	GO:0000028,GO:0003674,GO:0003676,GO:0003723,GO:0003735,GO:0004857,GO:0005198,GO:0005488,GO:0005575,GO:0005622,GO:0005623,GO:0005737,GO:0005829,GO:0005840,GO:0006412,GO:0006518,GO:0006807,GO:0006996,GO:0008073,GO:0008150,GO:0008152,GO:0009058,GO:0009059,GO:0009987,GO:0010467,GO:0015935,GO:0016043,GO:0019538,GO:0019843,GO:0022607,GO:0022613,GO:0022618,GO:0022626,GO:0022627,GO:0030234,GO:0032991,GO:…
contig_1036_np1212_62	J	ileS	amino acids such as valine, to avoid such errors it has two additional distinct tRNA(Ile)-dependent editing activities. One activity is designated as 'pretransfer' editing and involves the hydrolysis of activated Val-AMP. The other activity is designated 'posttransfer' editing and involves deacylation of mischarged Val-tRNA(Ile)	ko:K01870	Anticodon_1,tRNA-synt_1,zf-FPG_IleRS	GO:0003674,GO:0003824,GO:0004812,GO:0004822,GO:0005488,GO:0005575,GO:0005622,GO:0005623,GO:0005737,GO:0005829,GO:0006082,GO:0006139,GO:0006399,GO:0006412,GO:0006418,GO:0006428,GO:0006518,GO:0006520,GO:0006725,GO:0006807,GO:0008150,GO:0008152,GO:0008270,GO:0009058,GO:0009059,GO:0009987,GO:0010467,GO:0016070,GO:0016874,GO:0016875,GO:0019538,GO:0019752,GO:0034641,GO:0034645,GO:0034660,GO:0043038,GO:…
contig_1036_np1212_103	J	-	Acetyltransferase (GNAT) domain	-	Acetyltransf_3	-
contig_1036_np1212_131	J	rsmC	Specifically methylates the guanine in position 1207 of 16S rRNA in the 30S particle	ko:K00564	MTS,MTS_N	-
contig_1036_np1212_132	J	rsuA	Belongs to the pseudouridine synthase RsuA family	ko:K06183	PseudoU_synth_2,S4	-
contig_1036_np1212_235	J	rpsU	Belongs to the bacterial ribosomal protein bS21 family	ko:K02970	Ribosomal_S21	-
contig_1036_np1212_243	J	ksgA	Specifically dimethylates two adjacent adenosines (A1518 and A1519) in the loop of a conserved hairpin near the 3'-end of 16S rRNA in the 30S particle. May play a critical role in biogenesis of 30S subunits	ko:K02528	RrnaAD	-
contig_1036_np1212_346	J	rpmB	Belongs to the bacterial ribosomal protein bL28 family	ko:K02902	Ribosomal_L28	-
contig_1036_np1212_347	J	rpmG	there are paralogous genes in several bacterial genomes, and a CXXC motif for zinc binding and an upstream regulation region of the paralog lacking this motif that are regulated by zinc	ko:K02913	Ribosomal_L33	-
contig_1036_np1212_361	J	def2	Removes the formyl group from the N-terminal Met of newly synthesized proteins. Requires at least a dipeptide for an efficient rate of reaction. N-terminal L-methionine is a prerequisite for activity but the enzyme has broad specificity at other positions	ko:K01462	Pep_deformylase	GO:0003674,GO:0003824,GO:0006464,GO:0006807,GO:0008150,GO:0008152,GO:0008463,GO:0009987,GO:0016787,GO:0016810,GO:0016811,GO:0018193,GO:0018206,GO:0019538,GO:0031365,GO:0036211,GO:0042586,GO:0043170,GO:0043412,GO:0043686,GO:0044237,GO:0044238,GO:0044260,GO:0044267,GO:0071704,GO:1901564
contig_1036_np1212_384	J	ydaF_1	Acetyltransferases including N-acetylases of ribosomal proteins	-	Acetyltransf_1,Acetyltransf_3	-
contig_1036_np1212_401	J	-	Translation initiation factor	ko:K03113	SUI1	-
contig_1036_np1212_407	J	-	Sigma 54 modulation protein / S30EA ribosomal protein	-	Ribosomal_S30AE	-
contig_1036_np1212_434	J	pheT	Belongs to the phenylalanyl-tRNA synthetase beta subunit family. Type 1 subfamily	ko:K01890	B3_4,B5,FDX-ACB,tRNA_bind	-
contig_1036_np1212_435	J	pheS	Belongs to the class-II aminoacyl-tRNA synthetase family. Phe-tRNA synthetase alpha subunit type 1 subfamily	ko:K01889	Phe_tRNA-synt_N,tRNA-synt_2d	-
contig_1036_np1212_436	J	rplT	Binds directly to 23S ribosomal RNA and is necessary for the in vitro assembly process of the 50S ribosomal subunit. It is not involved in the protein synthesizing functions of that subunit	ko:K02887	Ribosomal_L20	-
contig_1036_np1212_437	J	rpmI	Belongs to the bacterial ribosomal protein bL35 family	ko:K02916	Ribosomal_L35p	-
contig_1036_np1212_438	J	-	translation initiation factor activity	ko:K02520	IF3_C,IF3_N	GO:0005575,GO:0005622,GO:0005623,GO:0005737,GO:0009507,GO:0009536,GO:0043226,GO:0043227,GO:0043229,GO:0043231,GO:0044424,GO:0044444,GO:0044464
contig_1036_np1212_439	J	thrS	Catalyzes the attachment of threonine to tRNA(Thr) in a two-step reaction L-threonine is first activated by ATP to form Thr-AMP and then transferred to the acceptor end of tRNA(Thr)	ko:K01868	HGTP_anticodon,TGS,tRNA-synt_2b,tRNA_SAD	-
contig_1036_np1212_456	J	-	RF-1 domain	ko:K15034	RF-1	-
contig_1036_np1212_474	J	rpsA	thus facilitating recognition of the initiation point. It is needed to translate mRNA with a short Shine-Dalgarno (SD) purine-rich sequence	ko:K02945	S1	GO:0000028,GO:0003674,GO:0003676,GO:0003723,GO:0003729,GO:0003735,GO:0005198,GO:0005488,GO:0005575,GO:0005622,GO:0005623,GO:0005737,GO:0005829,GO:0005840,GO:0006412,GO:0006417,GO:0006518,GO:0006807,GO:0006996,GO:0008150,GO:0008152,GO:0009058,GO:0009059,GO:0009889,GO:0009890,GO:0009892,GO:0009987,GO:0010467,GO:0010468,GO:0010556,GO:0010558,GO:0010605,GO:0010608,GO:0010629,GO:0015935,GO:0016043,GO:…
contig_1036_np1212_506	J	IV02_28330	rRNA methyltransferase	-	SpoU_methylase	-
contig_1036_np1212_526	J	serS	Catalyzes the attachment of serine to tRNA(Ser). Is also able to aminoacylate tRNA(Sec) with serine, to form the misacylated tRNA L-seryl-tRNA(Sec), which will be further converted into selenocysteinyl-tRNA(Sec)	ko:K01875	Seryl_tRNA_N,tRNA-synt_2b	GO:0000287,GO:0003674,GO:0003824,GO:0004812,GO:0004828,GO:0005488,GO:0005515,GO:0005575,GO:0005622,GO:0005623,GO:0005737,GO:0005829,GO:0006082,GO:0006139,GO:0006399,GO:0006412,GO:0006418,GO:0006434,GO:0006518,GO:0006520,GO:0006725,GO:0006807,GO:0008150,GO:0008152,GO:0008652,GO:0009058,GO:0009059,GO:0009069,GO:0009070,GO:0009987,GO:0010467,GO:0016053,GO:0016070,GO:0016259,GO:0016260,GO:0016874,GO:…
contig_1036_np1212_536	J	glnS	COG0008 Glutamyl- and glutaminyl-tRNA synthetases	ko:K01886	tRNA-synt_1c,tRNA-synt_1c_C	GO:0003674,GO:0003824,GO:0004812,GO:0004819,GO:0005575,GO:0005622,GO:0005623,GO:0005737,GO:0005829,GO:0006082,GO:0006139,GO:0006399,GO:0006412,GO:0006418,GO:0006425,GO:0006518,GO:0006520,GO:0006725,GO:0006807,GO:0008150,GO:0008152,GO:0009058,GO:0009059,GO:0009987,GO:0010467,GO:0016070,GO:0016874,GO:0016875,GO:0019538,GO:0019752,GO:0034641,GO:0034645,GO:0034660,GO:0043038,GO:0043039,GO:0043043,GO:…
contig_1036_np1212_546	J	truC	synthase	ko:K06175	PseudoU_synth_2	-
contig_1036_np1212_566	J	gltX	Catalyzes the attachment of glutamate to tRNA(Glu) in a two-step reaction glutamate is first activated by ATP to form Glu-AMP and then transferred to the acceptor end of tRNA(Glu)	ko:K01885	tRNA-synt_1c	GO:0003674,GO:0003824,GO:0004812,GO:0004818,GO:0005488,GO:0005575,GO:0005622,GO:0005623,GO:0005737,GO:0005829,GO:0006082,GO:0006139,GO:0006399,GO:0006412,GO:0006418,GO:0006424,GO:0006518,GO:0006520,GO:0006725,GO:0006807,GO:0008150,GO:0008152,GO:0008270,GO:0009058,GO:0009059,GO:0009987,GO:0010467,GO:0016070,GO:0016874,GO:0016875,GO:0019538,GO:0019752,GO:0034641,GO:0034645,GO:0034660,GO:0043038,GO:…
contig_1036_np1212_651	J	-	Belongs to the pseudouridine synthase RsuA family	ko:K06182	PseudoU_synth_2,S4	-
contig_1036_np1212_702	J	rplM	This protein is one of the early assembly proteins of the 50S ribosomal subunit, although it is not seen to bind rRNA by itself. It is important during the early stages of 50S assembly	ko:K02871	Ribosomal_L13	-
contig_1036_np1212_703	J	rpsI	Belongs to the universal ribosomal protein uS9 family	ko:K02996	Ribosomal_S9	-
contig_1036_np1212_716	J	rmf	During stationary phase, converts 70S ribosomes to an inactive dimeric form (100S ribosomes)	ko:K03812	RMF	-
contig_1036_np1212_717	J	rlmL	Specifically methylates the guanine in position 2445 (m2G2445) and the guanine in position 2069 (m7G2069) of 23S rRNA	ko:K12297	Methyltrans_SAM,THUMP,UPF0020	-
contig_1036_np1212_733	J	aspS	Aspartyl-tRNA synthetase with relaxed tRNA specificity since it is able to aspartylate not only its cognate tRNA(Asp) but also tRNA(Asn). Reaction proceeds in two steps L-aspartate is first activated by ATP to form Asp-AMP and then transferred to the acceptor end of tRNA(Asp Asn)	ko:K01876	GAD,tRNA-synt_2,tRNA_anti-codon	GO:0003674,GO:0003824,GO:0004812,GO:0004815,GO:0005575,GO:0005622,GO:0005623,GO:0005737,GO:0005829,GO:0006082,GO:0006139,GO:0006399,GO:0006412,GO:0006418,GO:0006422,GO:0006518,GO:0006520,GO:0006725,GO:0006807,GO:0008150,GO:0008152,GO:0009058,GO:0009059,GO:0009987,GO:0010467,GO:0016070,GO:0016874,GO:0016875,GO:0019538,GO:0019752,GO:0034641,GO:0034645,GO:0034660,GO:0043038,GO:0043039,GO:0043043,GO:…
contig_1036_np1212_811	J	-	Belongs to the pseudouridine synthase RsuA family	ko:K06181	PseudoU_synth_2	-
contig_1036_np1212_818	J	cmoB	Catalyzes carboxymethyl transfer from carboxy-S- adenosyl-L-methionine (Cx-SAM) to 5-hydroxyuridine (ho5U) to form 5-carboxymethoxyuridine (cmo5U) at position 34 in tRNAs	ko:K15257	Methyltransf_9	GO:0003674,GO:0003824,GO:0005575,GO:0005622,GO:0005623,GO:0005737,GO:0008150,GO:0008152,GO:0008168,GO:0008757,GO:0016740,GO:0016741,GO:0032259,GO:0044424,GO:0044464
contig_1036_np1212_820	J	-	2'-5' RNA ligase superfamily	-	LigT_PEase	-
contig_1036_np1212_832	J	-	Catalyzes the formation of N(1)- and N(8)-acetylspermidine from spermidine	-	Acetyltransf_3	-
contig_1036_np1212_834	J	cca	Catalyzes the addition and repair of the essential 3'- terminal CCA sequence in tRNAs without using a nucleic acid template. Adds these three nucleotides in the order of C, C, and A to the tRNA nucleotide-73, using CTP and ATP as substrates and producing inorganic pyrophosphate	ko:K00974	HD,PolyA_pol,PolyA_pol_RNAbd	GO:0001680,GO:0003674,GO:0003824,GO:0004652,GO:0004810,GO:0006139,GO:0006396,GO:0006399,GO:0006725,GO:0006807,GO:0008033,GO:0008150,GO:0008152,GO:0009987,GO:0010467,GO:0016070,GO:0016437,GO:0016740,GO:0016772,GO:0016779,GO:0031123,GO:0034470,GO:0034641,GO:0034660,GO:0042245,GO:0042780,GO:0043170,GO:0043628,GO:0044237,GO:0044238,GO:0046483,GO:0070566,GO:0070567,GO:0071704,GO:0090304,GO:0140098,GO:…
contig_1036_np1212_857	J	Z012_05060	RNA pseudouridylate synthase	ko:K06177	PseudoU_synth_2	GO:0000154,GO:0000455,GO:0001522,GO:0003674,GO:0003824,GO:0006139,GO:0006364,GO:0006396,GO:0006399,GO:0006400,GO:0006725,GO:0006807,GO:0008033,GO:0008150,GO:0008152,GO:0009451,GO:0009982,GO:0009987,GO:0010467,GO:0016070,GO:0016072,GO:0016853,GO:0016866,GO:0022613,GO:0031118,GO:0031119,GO:0034470,GO:0034641,GO:0034660,GO:0042254,GO:0043170,GO:0043412,GO:0044085,GO:0044237,GO:0044238,GO:0046483,GO:…
contig_1036_np1212_902	J	-	RNA pseudouridylate synthase	ko:K06180	PseudoU_synth_2	-
contig_1036_np1212_909	J	p20	Acetyltransferase (GNAT) domain	ko:K03790	Acetyltransf_3	-
contig_1036_np1212_944	J	rlmG	Specifically methylates the guanine in position 1835 (m2G1835) of 23S rRNA	ko:K11391	MTS	-
contig_1036_np1212_968	J	cysS	Belongs to the class-I aminoacyl-tRNA synthetase family	ko:K01883	DALR_2,tRNA-synt_1e,tRNA-synt_1g	-
contig_1036_np1212_982	J	gatB	Allows the formation of correctly charged Asn-tRNA(Asn) or Gln-tRNA(Gln) through the transamidation of misacylated Asp- tRNA(Asn) or Glu-tRNA(Gln) in organisms which lack either or both of asparaginyl-tRNA or glutaminyl-tRNA synthetases. The reaction takes place in the presence of glutamine and ATP through an activated phospho-Asp-tRNA(Asn) or phospho-Glu-tRNA(Gln)	ko:K02434	GatB_N,GatB_Yqey	-
contig_1036_np1212_983	J	gatA	Allows the formation of correctly charged Gln-tRNA(Gln) through the transamidation of misacylated Glu-tRNA(Gln) in organisms which lack glutaminyl-tRNA synthetase. The reaction takes place in the presence of glutamine and ATP through an activated gamma-phospho-Glu-tRNA(Gln)	ko:K02433	Amidase	-
contig_1036_np1212_984	J	gatC	Allows the formation of correctly charged Asn-tRNA(Asn) or Gln-tRNA(Gln) through the transamidation of misacylated Asp- tRNA(Asn) or Glu-tRNA(Gln) in organisms which lack either or both of asparaginyl-tRNA or glutaminyl-tRNA synthetases. The reaction takes place in the presence of glutamine and ATP through an activated phospho-Asp-tRNA(Asn) or phospho-Glu-tRNA(Gln)	ko:K02435	Glu-tRNAGln	-
contig_1036_np1212_990	J	-	Involved in the processing of the 5'end of 16S rRNA	ko:K08301	RNase_E_G,S1	-
contig_1036_np1212_1000	J	-	seems to be involved in modulation of the sigma(54) (RpoN) activity for quorum sensing	ko:K05808	Ribosomal_S30AE	-
contig_1036_np1212_1041	J	-	Catalyzes the formation of 2'O-methylated cytidine (Cm32) or 2'O-methylated uridine (Um32) at position 32 in tRNA	ko:K15396	SpoU_methylase	-
contig_1036_np1212_1043	J	rne	Endoribonuclease that plays a central role in RNA processing and decay. Required for the maturation of 5S and 16S rRNAs and the majority of tRNAs. Also involved in the degradation of most mRNAs	ko:K08300	RNase_E_G,S1	-
contig_1036_np1212_1044	J	rluC	Responsible for synthesis of pseudouridine from uracil	ko:K06179	PseudoU_synth_2,S4	-
contig_1036_np1212_1063	J	rpmF	Belongs to the bacterial ribosomal protein bL32 family	ko:K02911	Ribosomal_L32p	-
contig_1036_np1212_1133	J	-	Belongs to the class-I aminoacyl-tRNA synthetase family	ko:K01883	tRNA-synt_1e	-
contig_1036_np1212_1188	J	-	Acetyltransferase (GNAT) domain	ko:K03817	Acetyltransf_3	-
contig_1036_np1212_1258	J	mnmA	Catalyzes the 2-thiolation of uridine at the wobble position (U34) of tRNA, leading to the formation of s(2)U34	ko:K00566	tRNA_Me_trans	-
contig_1036_np1212_1366	J	dusC	Catalyzes the synthesis of 5,6-dihydrouridine (D), a modified base found in the D-loop of most tRNAs, via the reduction of the C5-C6 double bond in target uridines. Specifically modifies U16 in tRNAs	ko:K05541	Dus	-
contig_1036_np1212_1375	J	truA	Formation of pseudouridine at positions 38, 39 and 40 in the anticodon stem and loop of transfer RNAs	ko:K06173	PseudoU_synth_1	-
contig_1036_np1212_1408	J	trpS	Tryptophanyl-tRNA synthetase	ko:K01867	tRNA-synt_1b	-
contig_1036_np1212_1410	J	infA	One of the essential components for the initiation of protein synthesis. Stabilizes the binding of IF-2 and IF-3 on the 30S subunit to which N-formylmethionyl-tRNA(fMet) subsequently binds. Helps modulate mRNA selection, yielding the 30S pre- initiation complex (PIC). Upon addition of the 50S ribosomal subunit IF-1, IF-2 and IF-3 are released leaving the mature 70S translation initation complex	ko:K02518	eIF-1a	-
contig_1036_np1212_1412	J	proS	Catalyzes the attachment of proline to tRNA(Pro) in a two-step reaction proline is first activated by ATP to form Pro- AMP and then transferred to the acceptor end of tRNA(Pro). As ProRS can inadvertently accommodate and process non-cognate amino acids such as alanine and cysteine, to avoid such errors it has two additional distinct editing activities against alanine. One activity is designated a…	ko:K01881	HGTP_anticodon,tRNA-synt_2b,tRNA_edit	-
contig_1036_np1212_1429	J	prmB	Specifically methylates the 50S ribosomal protein L3 on a specific glutamine residue	ko:K07320	MTS	-
contig_1036_np1212_1437	J	trmA	Dual-specificity methyltransferase that catalyzes the formation of 5-methyluridine at position 54 (m5U54) in all tRNAs, and that of position 341 (m5U341) in tmRNA (transfer-mRNA)	ko:K00557	tRNA_U5-meth_tr	-
contig_1036_np1212_1439	J	metG	Is required not only for elongation of protein synthesis but also for the initiation of all mRNA translation through initiator tRNA(fMet) aminoacylation	ko:K01874	Anticodon_1,tRNA-synt_1g,tRNA_bind	-
contig_1036_np1212_1535	J	-	Acetyltransferase (GNAT) domain	-	Acetyltransf_1	-
contig_1036_np1212_1555	J	rimJ	COG1670 Acetyltransferases, including N-acetylases of ribosomal proteins	ko:K03790	Acetyltransf_3	-
contig_1036_np1212_1640	J	-	Belongs to the methyltransferase superfamily	ko:K06969	Methyltrans_SAM	-
contig_1036_np1212_1721	J	-	RNA pseudouridylate synthase	-	PseudoU_synth_2	-
contig_1036_np1212_1739	J	-	Specifically methylates the N3 position of the uracil ring of uridine 1498 (m3U1498) in 16S rRNA. Acts on the fully assembled 30S ribosomal subunit	-	Methyltrans_RNA	-
contig_1036_np1212_1812	J	rlmB	Specifically methylates the ribose of guanosine 2251 in 23S rRNA	ko:K03218	SpoU_methylase,SpoU_sub_bind	-
contig_1036_np1212_1821	J	rnc	Digests double-stranded RNA. Involved in the processing of primary rRNA transcript to yield the immediate precursors to the large and small rRNAs (23S and 16S). Processes some mRNAs, and tRNAs when they are encoded in the rRNA operon. Processes pre- crRNA and tracrRNA of type II CRISPR loci if present in the organism	ko:K03685	Ribonucleas_3_3,dsrm	-
contig_1036_np1212_1833	J	-	protein-(glutamine-N5) methyltransferase activity	-	Methyltransf_25,Methyltransf_32	-
contig_1036_np1212_1904	J	rsmH	Specifically methylates the N4 position of cytidine in position 1402 (C1402) of 16S rRNA	ko:K03438	Methyltransf_5	-
contig_1036_np1212_1907	J	rpsA	thus facilitating recognition of the initiation point. It is needed to translate mRNA with a short Shine-Dalgarno (SD) purine-rich sequence	ko:K02945	S1	-
contig_1036_np1212_1910	J	rnd	Exonuclease involved in the 3' processing of various precursor tRNAs. Initiates hydrolysis at the 3'-terminus of an RNA molecule and releases 5'-mononucleotides	ko:K03684	DNA_pol_A_exo1,HRDC	-
contig_1036_np1212_1977	J	prmA	Ribosomal protein L11 methyltransferase	ko:K02687	PrmA	-
contig_1036_np1212_1979	J	dusB	Catalyzes the synthesis of 5,6-dihydrouridine (D), a modified base found in the D-loop of most tRNAs, via the reduction of the C5-C6 double bond in target uridines	ko:K05540	Dus	-
contig_1036_np1212_1985	J	-	Endoribonuclease L-PSP	-	Ribonuc_L-PSP	-
contig_1036_np1212_2071	J	rnr	3'-5' exoribonuclease that releases 5'-nucleoside monophosphates and is involved in maturation of structured RNAs	ko:K12573	HTH_12,OB_RNB,RNB,S1	-
contig_1036_np1212_2075	J	tgt	Catalyzes the base-exchange of a guanine (G) residue with the queuine precursor 7-aminomethyl-7-deazaguanine (PreQ1) at position 34 (anticodon wobble position) in tRNAs with GU(N) anticodons (tRNA-Asp, -Asn, -His and -Tyr). Catalysis occurs through a double-displacement mechanism. The nucleophile active site attacks the C1' of nucleotide 34 to detach the guanine base from the RNA, forming a coval…	ko:K00773	TGT	-
contig_1036_np1212_2076	J	queA	Transfers and isomerizes the ribose moiety from AdoMet to the 7-aminomethyl group of 7-deazaguanine (preQ1-tRNA) to give epoxyqueuosine (oQ-tRNA)	ko:K07568	Queuosine_synth	GO:0002097,GO:0002099,GO:0003674,GO:0003824,GO:0005575,GO:0005622,GO:0005623,GO:0005737,GO:0005829,GO:0006139,GO:0006396,GO:0006399,GO:0006400,GO:0006725,GO:0006807,GO:0008033,GO:0008150,GO:0008152,GO:0008616,GO:0009058,GO:0009116,GO:0009119,GO:0009163,GO:0009314,GO:0009451,GO:0009628,GO:0009987,GO:0010467,GO:0016070,GO:0016740,GO:0016853,GO:0018130,GO:0019438,GO:0034404,GO:0034470,GO:0034641,GO:…
contig_1036_np1212_2176	J	trmL	Methylates the ribose at the nucleotide 34 wobble position in the two leucyl isoacceptors tRNA(Leu)(CmAA) and tRNA(Leu)(cmnm5UmAA). Catalyzes the methyl transfer from S- adenosyl-L-methionine to the 2'-OH of the wobble nucleotide	ko:K03216	SpoU_methylase	-
contig_1036_np1212_2268	J	valS	amino acids such as threonine, to avoid such errors, it has a posttransfer editing activity that hydrolyzes mischarged Thr-tRNA(Val) in a tRNA-dependent manner	ko:K01873	Anticodon_1,Val_tRNA-synt_C,tRNA-synt_1	-
contig_1036_np1212_2283	J	rplI	Binds to the 23S rRNA	ko:K02939	Ribosomal_L9_C,Ribosomal_L9_N	-
contig_1036_np1212_2285	J	rpsR	Binds as a heterodimer with protein S6 to the central domain of the 16S rRNA, where it helps stabilize the platform of the 30S subunit	ko:K02963	Ribosomal_S18	-
contig_1036_np1212_2286	J	rpsF	Binds together with S18 to 16S ribosomal RNA	ko:K02990	Ribosomal_S6	-
contig_1036_np1212_2300	J	pnp	Involved in mRNA degradation. Catalyzes the phosphorolysis of single-stranded polyribonucleotides processively in the 3'- to 5'-direction	ko:K00962	KH_1,PNPase,RNase_PH,RNase_PH_C,S1	-
contig_1036_np1212_2301	J	rpsO	Forms an intersubunit bridge (bridge B4) with the 23S rRNA of the 50S subunit in the ribosome	ko:K02956	Ribosomal_S15	-
contig_1036_np1212_2302	J	truB	Responsible for synthesis of pseudouridine from uracil- 55 in the psi GC loop of transfer RNAs	ko:K03177	TruB-C_2,TruB_C_2,TruB_N	-
contig_1036_np1212_2303	J	rbfA	One of several proteins that assist in the late maturation steps of the functional core of the 30S ribosomal subunit. Associates with free 30S ribosomal subunits (but not with 30S subunits that are part of 70S ribosomes or polysomes). Required for efficient processing of 16S rRNA. May interact with the 5'-terminal helix region of 16S rRNA	ko:K02834	RBFA	-
contig_1036_np1212_2304	J	infB	One of the essential components for the initiation of protein synthesis. Protects formylmethionyl-tRNA from spontaneous hydrolysis and promotes its binding to the 30S ribosomal subunits. Also involved in the hydrolysis of GTP during the formation of the 70S ribosomal complex	ko:K02519	GTP_EFTU,GTP_EFTU_D2,IF-2,IF2_N,IF2_assoc	-
contig_1036_np1212_2312	J	ftsJ	Specifically methylates the uridine in position 2552 of 23S rRNA at the 2'-O position of the ribose in the fully assembled 50S ribosomal subunit	ko:K02427	FtsJ	-
contig_1036_np1212_2313	J	yhbY	RNA-binding protein containing KH domain, possibly ribosomal protein	ko:K07574	CRS1_YhbY	-
contig_1036_np1212_2317	J	lysS	Belongs to the class-II aminoacyl-tRNA synthetase family	ko:K04567	tRNA-synt_2,tRNA_anti-codon	-
contig_1036_np1212_2318	J	prfB	Peptide chain release factor 2 directs the termination of translation in response to the peptide chain termination codons UGA and UAA	ko:K02836	PCRF,RF-1	-
contig_1036_np1212_2354	J	rsmJ	Specifically methylates the guanosine in position 1516 of 16S rRNA	ko:K15984	SAM_MT	-
contig_1036_np1212_2381	J	dtd	rejects L-amino acids rather than detecting D-amino acids in the active site. By recycling D-aminoacyl-tRNA to D-amino acids and free tRNA molecules, this enzyme counteracts the toxicity associated with the formation of D-aminoacyl-tRNA entities in vivo and helps enforce protein L-homochirality	ko:K07560	Tyr_Deacylase	GO:0002161,GO:0003674,GO:0003824,GO:0005575,GO:0005622,GO:0005623,GO:0005737,GO:0006139,GO:0006399,GO:0006450,GO:0006725,GO:0006807,GO:0006950,GO:0008150,GO:0008152,GO:0009266,GO:0009408,GO:0009628,GO:0009987,GO:0016070,GO:0016787,GO:0016788,GO:0034641,GO:0034660,GO:0043170,GO:0044237,GO:0044238,GO:0044424,GO:0044464,GO:0046483,GO:0050896,GO:0051499,GO:0051500,GO:0052689,GO:0065007,GO:0065008,GO:…
contig_1036_np1212_2399	J	-	Acetyltransferase (GNAT) domain	-	Acetyltransf_3	-
contig_1036_np1212_2405	J	dusA	Catalyzes the synthesis of 5,6-dihydrouridine (D), a modified base found in the D-loop of most tRNAs, via the reduction of the C5-C6 double bond in target uridines. Specifically modifies U20 and U20a in tRNAs	ko:K05539	Dus	-
contig_1036_np1212_2433	J	-	endoribonuclease	-	Ribonuc_L-PSP	-
contig_1036_np1212_2437	J	rlmD	Catalyzes the formation of 5-methyl-uridine at position 1939 (m5U1939) in 23S rRNA	ko:K03215	TRAM,tRNA_U5-meth_tr	-
contig_1036_np1212_2438	J	rluA	Pseudouridine synthase	ko:K06177	PseudoU_synth_2	-
contig_1036_np1212_2503	J	hfq	RNA chaperone that binds small regulatory RNA (sRNAs) and mRNAs to facilitate mRNA translational regulation in response to envelope stress, environmental stress and changes in metabolite concentrations. Also binds with high specificity to tRNAs	ko:K03666	Hfq	GO:0003674,GO:0003676,GO:0003677,GO:0003681,GO:0003723,GO:0005488,GO:0005575,GO:0005622,GO:0005623,GO:0005737,GO:0005829,GO:0006139,GO:0006378,GO:0006396,GO:0006397,GO:0006417,GO:0006725,GO:0006807,GO:0008150,GO:0008152,GO:0009889,GO:0009890,GO:0009891,GO:0009892,GO:0009893,GO:0009987,GO:0010467,GO:0010468,GO:0010556,GO:0010557,GO:0010558,GO:0010604,GO:0010605,GO:0010608,GO:0010628,GO:0010629,GO:…
contig_1036_np1212_2504	J	miaA	Catalyzes the transfer of a dimethylallyl group onto the adenine at position 37 in tRNAs that read codons beginning with uridine, leading to the formation of N6-(dimethylallyl)adenosine (i(6)A)	ko:K00791	IPPT	-
contig_1036_np1212_2512	J	-	Belongs to the pseudouridine synthase RsuA family	ko:K06178	PseudoU_synth_2,S4	-
contig_1036_np1212_2514	J	-	Belongs to the SUA5 family	-	Sua5_yciO_yrdC	-
contig_1036_np1212_2543	J	gluQ	Catalyzes the tRNA-independent activation of glutamate in presence of ATP and the subsequent transfer of glutamate onto a tRNA(Asp). Glutamate is transferred on the 2-amino-5-(4,5- dihydroxy-2-cyclopenten-1-yl) moiety of the queuosine in the wobble position of the QUC anticodon	ko:K01894	tRNA-synt_1c	-
contig_1036_np1212_2580	J	alaS	Catalyzes the attachment of alanine to tRNA(Ala) in a two-step reaction alanine is first activated by ATP to form Ala- AMP and then transferred to the acceptor end of tRNA(Ala). Also edits incorrectly charged Ser-tRNA(Ala) and Gly-tRNA(Ala) via its editing domain	ko:K01872	DHHA1,tRNA-synt_2c,tRNA_SAD	-
contig_1036_np1212_2654	J	tyrS	Catalyzes the attachment of tyrosine to tRNA(Tyr) in a two-step reaction tyrosine is first activated by ATP to form Tyr- AMP and then transferred to the acceptor end of tRNA(Tyr)	ko:K01866	tRNA-synt_1b	-
contig_1036_np1212_2671	J	truD	Responsible for synthesis of pseudouridine from uracil- 13 in transfer RNAs	ko:K06176	TruD	-
contig_1036_np1212_2687	J	frr	Responsible for the release of ribosomes from messenger RNA at the termination of protein biosynthesis. May increase the efficiency of translation by recycling ribosomes from one round of translation to another	ko:K02838	RRF	-
contig_1036_np1212_2689	J	tsf	Associates with the EF-Tu.GDP complex and induces the exchange of GDP to GTP. It remains bound to the aminoacyl-tRNA.EF- Tu.GTP complex up to the GTP hydrolysis stage on the ribosome	ko:K02357	EF_TS	-
contig_1036_np1212_2690	J	rpsB	Belongs to the universal ribosomal protein uS2 family	ko:K02967	Ribosomal_S2	-
contig_1036_np1212_2699	J	bamE	Part of the outer membrane protein assembly complex, which is involved in assembly and insertion of beta-barrel proteins into the outer membrane	ko:K06186	SmpA_OmlA	-
contig_1036_np1212_2746	J	-	Zinc-ribbon containing domain	-	DUF1451	-
contig_1036_np1212_2747	J	leuS	due to the large number of codons that tRNA(Leu) recognizes, the leucyl-tRNA synthetase does not recognize the anticodon loop of the tRNA, but instead recognition is dependent on a conserved discriminator base A37 and a long arm	ko:K01869	Anticodon_1,tRNA-synt_1,tRNA-synt_1_2	-
contig_1036_np1212_2792	J	-	COG1670 acetyltransferases, including N-acetylases of ribosomal proteins	-	Acetyltransf_3	-
contig_1036_np1212_2809	J	rplQ	Ribosomal protein L17	ko:K02879	Ribosomal_L17	-
contig_1036_np1212_2811	J	rpsD	One of the primary rRNA binding proteins, it binds directly to 16S rRNA where it nucleates assembly of the body of the 30S subunit	ko:K02986	Ribosomal_S4,S4	-
contig_1036_np1212_2812	J	rpsK	Located on the platform of the 30S subunit, it bridges several disparate RNA helices of the 16S rRNA. Forms part of the Shine-Dalgarno cleft in the 70S ribosome	ko:K02948	Ribosomal_S11	GO:0000028,GO:0000462,GO:0003674,GO:0003676,GO:0003723,GO:0003729,GO:0003735,GO:0005198,GO:0005488,GO:0005575,GO:0005622,GO:0005623,GO:0005737,GO:0005829,GO:0005840,GO:0006139,GO:0006364,GO:0006396,GO:0006412,GO:0006518,GO:0006725,GO:0006807,GO:0006996,GO:0008150,GO:0008152,GO:0009058,GO:0009059,GO:0009987,GO:0010467,GO:0015935,GO:0016043,GO:0016070,GO:0016072,GO:0019538,GO:0019843,GO:0022607,GO:…
contig_1036_np1212_2813	J	rpsM	Located at the top of the head of the 30S subunit, it contacts several helices of the 16S rRNA. In the 70S ribosome it contacts the 23S rRNA (bridge B1a) and protein L5 of the 50S subunit (bridge B1b), connecting the 2 subunits	ko:K02952	Ribosomal_S13	GO:0003674,GO:0003735,GO:0005198,GO:0005575,GO:0005622,GO:0005623,GO:0005737,GO:0005829,GO:0005840,GO:0006412,GO:0006518,GO:0006807,GO:0008150,GO:0008152,GO:0009058,GO:0009059,GO:0009987,GO:0010467,GO:0015935,GO:0019538,GO:0022613,GO:0022626,GO:0022627,GO:0032991,GO:0034641,GO:0034645,GO:0042254,GO:0043043,GO:0043170,GO:0043226,GO:0043228,GO:0043229,GO:0043232,GO:0043603,GO:0043604,GO:0044085,GO:…
contig_1036_np1212_2815	J	rplO	Binds to the 23S rRNA	ko:K02876	Ribosomal_L27A	-
contig_1036_np1212_2816	J	rpmD	Ribosomal protein L30	ko:K02907	Ribosomal_L30	-
contig_1036_np1212_2817	J	rpsE	Located at the back of the 30S subunit body where it stabilizes the conformation of the head with respect to the body	ko:K02988	Ribosomal_S5,Ribosomal_S5_C	-
contig_1036_np1212_2818	J	rplR	This is one of the proteins that binds and probably mediates the attachment of the 5S RNA into the large ribosomal subunit, where it forms part of the central protuberance	ko:K02881	Ribosomal_L18p	-
contig_1036_np1212_2819	J	rplF	This protein binds to the 23S rRNA, and is important in its secondary structure. It is located near the subunit interface in the base of the L7 L12 stalk, and near the tRNA binding site of the peptidyltransferase center	ko:K02933	Ribosomal_L6	-
contig_1036_np1212_2820	J	rpsH	One of the primary rRNA binding proteins, it binds directly to 16S rRNA central domain where it helps coordinate assembly of the platform of the 30S subunit	ko:K02994	Ribosomal_S8	-
contig_1036_np1212_2821	J	rpsN	Binds 16S rRNA, required for the assembly of 30S particles and may also be responsible for determining the conformation of the 16S rRNA at the A site	ko:K02954	Ribosomal_S14	-
contig_1036_np1212_2822	J	rplE	This is 1 of the proteins that binds and probably mediates the attachment of the 5S RNA into the large ribosomal subunit, where it forms part of the central protuberance. In the 70S ribosome it contacts protein S13 of the 30S subunit (bridge B1b), connecting the 2 subunits	ko:K02931	Ribosomal_L5,Ribosomal_L5_C	-
contig_1036_np1212_2823	J	rplX	One of the proteins that surrounds the polypeptide exit tunnel on the outside of the subunit	ko:K02895	KOW,ribosomal_L24	GO:0000027,GO:0003674,GO:0003735,GO:0005198,GO:0005575,GO:0005622,GO:0005623,GO:0005737,GO:0005829,GO:0005840,GO:0006412,GO:0006518,GO:0006807,GO:0006996,GO:0008150,GO:0008152,GO:0009058,GO:0009059,GO:0009987,GO:0010467,GO:0015934,GO:0016043,GO:0019538,GO:0022607,GO:0022613,GO:0022618,GO:0022625,GO:0022626,GO:0032991,GO:0034622,GO:0034641,GO:0034645,GO:0042254,GO:0042255,GO:0042273,GO:0043043,GO:…
contig_1036_np1212_2824	J	rplN	Binds to 23S rRNA. Forms part of two intersubunit bridges in the 70S ribosome	ko:K02874	Ribosomal_L14	-
contig_1036_np1212_2825	J	rpsQ	One of the primary rRNA binding proteins, it binds specifically to the 5'-end of 16S ribosomal RNA	ko:K02961	Ribosomal_S17	-
contig_1036_np1212_2826	J	rpmC	Belongs to the universal ribosomal protein uL29 family	ko:K02904	Ribosomal_L29	-
contig_1036_np1212_2827	J	rplP	Binds 23S rRNA and is also seen to make contacts with the A and possibly P site tRNAs	ko:K02878	Ribosomal_L16	-
contig_1036_np1212_2828	J	rpsC	Binds the lower part of the 30S subunit head. Binds mRNA in the 70S ribosome, positioning it for translation	ko:K02982	KH_2,Ribosomal_S3_C	-
contig_1036_np1212_2829	J	rplV	The globular domain of the protein is located near the polypeptide exit tunnel on the outside of the subunit, while an extended beta-hairpin is found that lines the wall of the exit tunnel in the center of the 70S ribosome	ko:K02890	Ribosomal_L22	-
contig_1036_np1212_2830	J	rpsS	Protein S19 forms a complex with S13 that binds strongly to the 16S ribosomal RNA	ko:K02965	Ribosomal_S19	GO:0000028,GO:0003674,GO:0003735,GO:0005198,GO:0005575,GO:0005622,GO:0005623,GO:0005737,GO:0005829,GO:0005840,GO:0006412,GO:0006518,GO:0006807,GO:0006996,GO:0008150,GO:0008152,GO:0009058,GO:0009059,GO:0009987,GO:0010467,GO:0015935,GO:0016043,GO:0019538,GO:0022607,GO:0022613,GO:0022618,GO:0022626,GO:0022627,GO:0032991,GO:0034622,GO:0034641,GO:0034645,GO:0042254,GO:0042255,GO:0042274,GO:0043043,GO:…
contig_1036_np1212_2831	J	rplB	One of the primary rRNA binding proteins. Required for association of the 30S and 50S subunits to form the 70S ribosome, for tRNA binding and peptide bond formation. It has been suggested to have peptidyltransferase activity	ko:K02886	Ribosomal_L2,Ribosomal_L2_C	-
contig_1036_np1212_2832	J	rplW	One of the early assembly proteins it binds 23S rRNA. One of the proteins that surrounds the polypeptide exit tunnel on the outside of the ribosome. Forms the main docking site for trigger factor binding to the ribosome	ko:K02892	Ribosomal_L23	-
contig_1036_np1212_2833	J	rplD	Forms part of the polypeptide exit tunnel	ko:K02926	Ribosomal_L4	-
contig_1036_np1212_2834	J	rplC	One of the primary rRNA binding proteins, it binds directly near the 3'-end of the 23S rRNA, where it nucleates assembly of the 50S subunit	ko:K02906	Ribosomal_L3	-
contig_1036_np1212_2835	J	rpsJ	Involved in the binding of tRNA to the ribosomes	ko:K02946	Ribosomal_S10	-
contig_1036_np1212_2868	J	rlmH	Specifically methylates the pseudouridine at position 1915 (m3Psi1915) in 23S rRNA	ko:K00783	SPOUT_MTase	-
contig_1036_np1212_2869	J	rsfS	Functions as a ribosomal silencing factor. Interacts with ribosomal protein L14 (rplN), blocking formation of intersubunit bridge B8. Prevents association of the 30S and 50S ribosomal subunits and the formation of functional ribosomes, thus repressing translation	ko:K09710	RsfS	-
contig_1036_np1212_2888	J	rplS	This protein is located at the 30S-50S ribosomal subunit interface and may play a role in the structure and function of the aminoacyl-tRNA binding site	ko:K02884	Ribosomal_L19	-
contig_1036_np1212_2889	J	trmD	Belongs to the RNA methyltransferase TrmD family	ko:K00554	tRNA_m1G_MT	-
contig_1036_np1212_2890	J	rimM	An accessory protein needed during the final step in the assembly of 30S ribosomal subunit, possibly for assembly of the head region. Probably interacts with S19. Essential for efficient processing of 16S rRNA. May be needed both before and after RbfA during the maturation of 16S rRNA. It has affinity for free ribosomal 30S subunits but not for 70S ribosomes	ko:K02860	PRC,RimM	-
contig_1036_np1212_2891	J	rpsP	Belongs to the bacterial ribosomal protein bS16 family	ko:K02959	Ribosomal_S16	GO:0000028,GO:0000217,GO:0000400,GO:0003674,GO:0003676,GO:0003677,GO:0003735,GO:0003824,GO:0004518,GO:0004519,GO:0004520,GO:0004536,GO:0005198,GO:0005488,GO:0005575,GO:0005622,GO:0005623,GO:0005737,GO:0005829,GO:0005840,GO:0006139,GO:0006259,GO:0006412,GO:0006518,GO:0006725,GO:0006807,GO:0006996,GO:0008150,GO:0008152,GO:0009058,GO:0009059,GO:0009987,GO:0010467,GO:0015935,GO:0016043,GO:0016787,GO:…
contig_1036_np1212_2992	J	prfC	Increases the formation of ribosomal termination complexes and stimulates activities of RF-1 and RF-2. It binds guanine nucleotides and has strong preference for UGA stop codons. It may interact directly with the ribosome. The stimulation of RF- 1 and RF-2 is significantly reduced by GTP and GDP, but not by GMP	ko:K02837	GTP_EFTU,GTP_EFTU_D2,RF3_C	-
contig_1036_np1212_2995	J	prfC	Elongation factor Tu GTP binding domain	ko:K02837	GTP_EFTU,GTP_EFTU_D2,RF3_C	GO:0003674,GO:0003676,GO:0003723,GO:0003747,GO:0005488,GO:0005575,GO:0005622,GO:0005623,GO:0005737,GO:0005829,GO:0006412,GO:0006415,GO:0006518,GO:0006807,GO:0008079,GO:0008135,GO:0008150,GO:0008152,GO:0009058,GO:0009059,GO:0009987,GO:0010467,GO:0016043,GO:0016150,GO:0019538,GO:0022411,GO:0032984,GO:0034641,GO:0034645,GO:0043043,GO:0043170,GO:0043603,GO:0043604,GO:0043624,GO:0043933,GO:0044237,GO:…
contig_1036_np1212_3000	J	prfC	Increases the formation of ribosomal termination complexes and stimulates activities of RF-1 and RF-2. It binds guanine nucleotides and has strong preference for UGA stop codons. It may interact directly with the ribosome. The stimulation of RF- 1 and RF-2 is significantly reduced by GTP and GDP, but not by GMP	ko:K02837	GTP_EFTU,GTP_EFTU_D2,RF3_C	-
contig_1036_np1212_3026	J	epmA	COG2269 Truncated, possibly inactive, lysyl-tRNA synthetase (class II)	ko:K04568	tRNA-synt_2	GO:0003674,GO:0003824,GO:0005575,GO:0005622,GO:0005623,GO:0005737,GO:0005829,GO:0006082,GO:0006139,GO:0006399,GO:0006412,GO:0006418,GO:0006430,GO:0006464,GO:0006518,GO:0006520,GO:0006725,GO:0006807,GO:0008150,GO:0008152,GO:0009058,GO:0009059,GO:0009987,GO:0010467,GO:0016070,GO:0016740,GO:0016746,GO:0016755,GO:0018193,GO:0018205,GO:0019538,GO:0019752,GO:0034641,GO:0034645,GO:0034660,GO:0036211,GO:…
contig_1036_np1212_3027	J	efp	Involved in peptide bond synthesis. Alleviates ribosome stalling that occurs when 3 or more consecutive Pro residues or the sequence PPG is present in a protein, possibly by augmenting the peptidyl transferase activity of the ribosome. Modification of Lys-34 is required for alleviation	ko:K02356	EFP,EFP_N,Elong-fact-P_C	-
contig_1036_np1212_3031	J	miaB	Catalyzes the methylthiolation of N6- (dimethylallyl)adenosine (i(6)A), leading to the formation of 2- methylthio-N6-(dimethylallyl)adenosine (ms(2)i(6)A) at position 37 in tRNAs that read codons beginning with uridine	ko:K06168	Radical_SAM,TRAM,UPF0004	GO:0001510,GO:0003674,GO:0003824,GO:0005488,GO:0005575,GO:0005622,GO:0005623,GO:0005737,GO:0005829,GO:0006139,GO:0006396,GO:0006399,GO:0006400,GO:0006725,GO:0006807,GO:0008033,GO:0008150,GO:0008152,GO:0009451,GO:0009987,GO:0010467,GO:0016070,GO:0016740,GO:0016782,GO:0030488,GO:0032259,GO:0034470,GO:0034641,GO:0034660,GO:0035596,GO:0035597,GO:0035600,GO:0043170,GO:0043412,GO:0043414,GO:0044237,GO:…
contig_1036_np1212_3033	J	ybeY	Single strand-specific metallo-endoribonuclease involved in late-stage 70S ribosome quality control and in maturation of the 3' terminus of the 16S rRNA	ko:K07042	UPF0054	GO:0000469,GO:0000478,GO:0003674,GO:0003824,GO:0004518,GO:0004519,GO:0004521,GO:0004540,GO:0005488,GO:0006139,GO:0006355,GO:0006364,GO:0006396,GO:0006412,GO:0006518,GO:0006725,GO:0006807,GO:0006950,GO:0008150,GO:0008152,GO:0009058,GO:0009059,GO:0009266,GO:0009408,GO:0009628,GO:0009889,GO:0009987,GO:0010467,GO:0010468,GO:0010556,GO:0016070,GO:0016072,GO:0016151,GO:0016787,GO:0016788,GO:0016892,GO:…
contig_1036_np1212_3046	J	tuf	This protein promotes the GTP-dependent binding of aminoacyl-tRNA to the A-site of ribosomes during protein biosynthesis	ko:K02358	GTP_EFTU,GTP_EFTU_D2,GTP_EFTU_D3	-
contig_1036_np1212_3047	J	fusA	Catalyzes the GTP-dependent ribosomal translocation step during translation elongation. During this step, the ribosome changes from the pre-translocational (PRE) to the post- translocational (POST) state as the newly formed A-site-bound peptidyl-tRNA and P-site-bound deacylated tRNA move to the P and E sites, respectively. Catalyzes the coordinated movement of the two tRNA molecules, the mRNA and…	ko:K02355	EFG_C,EFG_II,EFG_IV,GTP_EFTU,GTP_EFTU_D2	GO:0003674,GO:0003676,GO:0003723,GO:0003746,GO:0005488,GO:0005575,GO:0005622,GO:0005623,GO:0005737,GO:0005829,GO:0006412,GO:0006414,GO:0006518,GO:0006807,GO:0008135,GO:0008150,GO:0008152,GO:0009058,GO:0009059,GO:0009987,GO:0010467,GO:0019538,GO:0034641,GO:0034645,GO:0043043,GO:0043170,GO:0043603,GO:0043604,GO:0044237,GO:0044238,GO:0044249,GO:0044260,GO:0044267,GO:0044271,GO:0044424,GO:0044444,GO:…
contig_1036_np1212_3048	J	rpsG	One of the primary rRNA binding proteins, it binds directly to 16S rRNA where it nucleates assembly of the head domain of the 30S subunit. Is located at the subunit interface close to the decoding center, probably blocks exit of the E-site tRNA	ko:K02992	Ribosomal_S7	-
contig_1036_np1212_3049	J	rpsL	Interacts with and stabilizes bases of the 16S rRNA that are involved in tRNA selection in the A site and with the mRNA backbone. Located at the interface of the 30S and 50S subunits, it traverses the body of the 30S subunit contacting proteins on the other side and probably holding the rRNA structure together. The combined cluster of proteins S8, S12 and S17 appears to hold together the shoulder…	ko:K02950	Ribosom_S12_S23	-
contig_1036_np1212_3052	J	rplL	Forms part of the ribosomal stalk which helps the ribosome interact with GTP-bound translation factors. Is thus essential for accurate translation	ko:K02935	Ribosomal_L12,Ribosomal_L12_N	-
contig_1036_np1212_3053	J	rplJ	Forms part of the ribosomal stalk, playing a central role in the interaction of the ribosome with GTP-bound translation factors	ko:K02864	Ribosomal_L10	GO:0003674,GO:0003735,GO:0005198,GO:0005488,GO:0005575,GO:0005622,GO:0005623,GO:0005737,GO:0005829,GO:0005840,GO:0006412,GO:0006417,GO:0006518,GO:0006807,GO:0008150,GO:0008152,GO:0009058,GO:0009059,GO:0009889,GO:0009890,GO:0009892,GO:0009987,GO:0010467,GO:0010468,GO:0010556,GO:0010558,GO:0010605,GO:0010608,GO:0010629,GO:0015934,GO:0017148,GO:0019222,GO:0019538,GO:0022625,GO:0022626,GO:0031323,GO:…
contig_1036_np1212_3054	J	rplA	Binds directly to 23S rRNA. The L1 stalk is quite mobile in the ribosome, and is involved in E site tRNA release	ko:K02863	Ribosomal_L1	-
contig_1036_np1212_3055	J	rplK	Forms part of the ribosomal stalk which helps the ribosome interact with GTP-bound translation factors	ko:K02867	Ribosomal_L11,Ribosomal_L11_N	GO:0000027,GO:0003674,GO:0003676,GO:0003723,GO:0003735,GO:0005198,GO:0005488,GO:0005575,GO:0005622,GO:0005623,GO:0005737,GO:0005829,GO:0005840,GO:0006412,GO:0006415,GO:0006518,GO:0006807,GO:0006950,GO:0006996,GO:0007154,GO:0008150,GO:0008152,GO:0009058,GO:0009059,GO:0009267,GO:0009605,GO:0009987,GO:0009991,GO:0010467,GO:0015934,GO:0015968,GO:0016043,GO:0019538,GO:0019843,GO:0022411,GO:0022607,GO:…
contig_1036_np1212_3058	J	tuf	This protein promotes the GTP-dependent binding of aminoacyl-tRNA to the A-site of ribosomes during protein biosynthesis	ko:K02358	GTP_EFTU,GTP_EFTU_D2,GTP_EFTU_D3	-
contig_1036_np1212_3083	J	-	S4 RNA-binding domain	-	PseudoU_synth_2	-
contig_1036_np1212_3104	J	rph	Phosphorolytic exoribonuclease that removes nucleotide residues following the -CCA terminus of tRNA and adds nucleotides to the ends of RNA molecules by using nucleoside diphosphates as substrates	ko:K00989	RNase_PH,RNase_PH_C	-
contig_1036_np1212_3232	J	-	Peptidase family U32	-	Peptidase_U32,YjgF_endoribonc	-
contig_1036_np1212_3236	J	-	Endoribonuclease L-PSP	-	Ribonuc_L-PSP	-
contig_1036_np1212_3271	J	-	Amidase	ko:K01426	Amidase	-
contig_1036_np1212_3325	J	trmB	Catalyzes the formation of N(7)-methylguanine at position 46 (m7G46) in tRNA	ko:K03439	Methyltransf_4	-
contig_1036_np1212_3372	J	tsaC	Required for the formation of a threonylcarbamoyl group on adenosine at position 37 (t(6)A37) in tRNAs that read codons beginning with adenine. Catalyzes the conversion of L-threonine, HCO(3)(-) CO(2) and ATP to give threonylcarbamoyl-AMP (TC-AMP) as the acyladenylate intermediate, with the release of diphosphate	ko:K07566	Sua5_yciO_yrdC	GO:0000049,GO:0000166,GO:0002949,GO:0003674,GO:0003676,GO:0003723,GO:0003725,GO:0003824,GO:0005488,GO:0005524,GO:0005575,GO:0005622,GO:0005623,GO:0005737,GO:0005829,GO:0006139,GO:0006396,GO:0006399,GO:0006400,GO:0006450,GO:0006725,GO:0006807,GO:0008033,GO:0008144,GO:0008150,GO:0008152,GO:0009451,GO:0009987,GO:0010467,GO:0016070,GO:0016740,GO:0016772,GO:0016779,GO:0017076,GO:0030554,GO:0032553,GO:…
contig_1036_np1212_3376	J	fmt	Attaches a formyl group to the free amino group of methionyl-tRNA(fMet). The formyl group appears to play a dual role in the initiator identity of N-formylmethionyl-tRNA by promoting its recognition by IF2 and preventing the misappropriation of this tRNA by the elongation apparatus	ko:K00604	Formyl_trans_C,Formyl_trans_N	-
contig_1036_np1212_3377	J	sun	Specifically methylates the cytosine at position 967 (m5C967) of 16S rRNA	ko:K03500	Methyltr_RsmB-F,Methyltr_RsmF_N,NusB	-
contig_1036_np1212_3382	J	glyQ	glycyl-tRNA synthetase alpha subunit	ko:K01878	tRNA-synt_2e	-
contig_1036_np1212_3383	J	glyS	Glycyl-tRNA synthetase beta subunit	ko:K01879	DALR_1,tRNA_synt_2f	-
contig_1036_np1212_3406	J	rsmG	Specifically methylates the N7 position of guanine in position 527 of 16S rRNA	ko:K03501	GidB	GO:0000154,GO:0001510,GO:0003674,GO:0003824,GO:0005575,GO:0005622,GO:0005623,GO:0005737,GO:0005829,GO:0006139,GO:0006364,GO:0006396,GO:0006725,GO:0006807,GO:0008150,GO:0008152,GO:0008168,GO:0008170,GO:0008173,GO:0008649,GO:0008757,GO:0009451,GO:0009987,GO:0010467,GO:0016070,GO:0016072,GO:0016435,GO:0016740,GO:0016741,GO:0022613,GO:0031167,GO:0032259,GO:0034470,GO:0034641,GO:0034660,GO:0036265,GO:…
contig_1036_np1212_3453	J	-	COG1187 16S rRNA uridine-516 pseudouridylate synthase and related pseudouridylate synthases	ko:K06183	PseudoU_synth_2,S4	-
contig_1036_np1212_3474	J	mnmE	Exhibits a very high intrinsic GTPase hydrolysis rate. Involved in the addition of a carboxymethylaminomethyl (cmnm) group at the wobble position (U34) of certain tRNAs, forming tRNA- cmnm(5)s(2)U34	ko:K03650	MMR_HSR1,MnmE_helical,TrmE_N	-
contig_1036_np1212_3476	J	rnpA	RNaseP catalyzes the removal of the 5'-leader sequence from pre-tRNA to produce the mature 5'-terminus. It can also cleave other RNA substrates such as 4.5S RNA. The protein component plays an auxiliary but essential role in vivo by binding to the 5'-leader sequence and broadening the substrate specificity of the ribozyme	ko:K03536	Ribonuclease_P	-
contig_1036_np1212_3477	J	rpmH	Belongs to the bacterial ribosomal protein bL34 family	ko:K02914	Ribosomal_L34	-
contig_1036_np1212_3533	J	-	Protein of unknown function (DUF938)	-	DUF938	-
contig_1036_np1212_3615	J	-	Amidase	-	Amidase	-
contig_1036_np1212_3753	J	-	Acetyltransferase (GNAT) domain	-	Acetyltransf_3	-
contig_1036_np1212_3763	J	fusA2	Catalyzes the GTP-dependent ribosomal translocation step during translation elongation. During this step, the ribosome changes from the pre-translocational (PRE) to the post- translocational (POST) state as the newly formed A-site-bound peptidyl-tRNA and P-site-bound deacylated tRNA move to the P and E sites, respectively. Catalyzes the coordinated movement of the two tRNA molecules, the mRNA and…	ko:K02355	EFG_C,EFG_II,EFG_IV,GTP_EFTU,GTP_EFTU_D2	GO:0003674,GO:0003676,GO:0003723,GO:0003746,GO:0005488,GO:0006412,GO:0006414,GO:0006518,GO:0006807,GO:0008135,GO:0008150,GO:0008152,GO:0009058,GO:0009059,GO:0009987,GO:0010467,GO:0019538,GO:0034641,GO:0034645,GO:0043043,GO:0043170,GO:0043603,GO:0043604,GO:0044237,GO:0044238,GO:0044249,GO:0044260,GO:0044267,GO:0044271,GO:0071704,GO:0097159,GO:1901363,GO:1901564,GO:1901566,GO:1901576
contig_1036_np1212_3828	J	-	COG0564 Pseudouridylate synthases, 23S RNA-specific	ko:K06177	PseudoU_synth_2	-
contig_1036_np1212_3855	J	rluD	Responsible for synthesis of pseudouridine from uracil	ko:K06180	PseudoU_synth_2,S4	-
contig_1036_np1212_3925	J	rlmF	Ribosomal RNA large subunit methyltransferase F	ko:K06970	Methyltransf_10	GO:0000154,GO:0001510,GO:0003674,GO:0003824,GO:0006139,GO:0006364,GO:0006396,GO:0006725,GO:0006807,GO:0008150,GO:0008152,GO:0008168,GO:0008170,GO:0008173,GO:0008649,GO:0008757,GO:0008988,GO:0009451,GO:0009987,GO:0010467,GO:0016070,GO:0016072,GO:0016433,GO:0016740,GO:0016741,GO:0022613,GO:0031167,GO:0032259,GO:0034470,GO:0034641,GO:0034660,GO:0042254,GO:0043170,GO:0043412,GO:0043414,GO:0044085,GO:…
contig_1036_np1212_3979	J	trmJ	Catalyzes the formation of 2'O-methylated cytidine (Cm32) or 2'O-methylated uridine (Um32) at position 32 in tRNA	ko:K02533,ko:K15396	SpoU_methylase	-
contig_1036_np1212_3982	J	rlmN	Specifically methylates position 2 of adenine 2503 in 23S rRNA and position 2 of adenine 37 in tRNAs	ko:K06941	Radical_SAM	-
contig_1036_np1212_3985	J	hisS	histidyl-tRNA synthetase	ko:K01892	HGTP_anticodon,tRNA-synt_His	-
contig_1036_np1212_4064	J	ychF	ATPase that binds to both the 70S ribosome and the 50S ribosomal subunit in a nucleotide-independent manner	ko:K06942	MMR_HSR1,YchF-GTPase_C	-
contig_1036_np1212_4065	J	pth	The natural substrate for this enzyme may be peptidyl- tRNAs which drop off the ribosome during protein synthesis	ko:K01056	Pept_tRNA_hydro	-
contig_1036_np1212_4066	J	ctc	This is one of the proteins that binds to the 5S RNA in the ribosome where it forms part of the central protuberance	ko:K02897	Ribosomal_L25p,Ribosomal_TL5_C	-
contig_1036_np1212_4071	J	prfA	Peptide chain release factor 1 directs the termination of translation in response to the peptide chain termination codons UAG and UAA	ko:K02835	PCRF,RF-1	-
contig_1036_np1212_4072	J	prmC	Methylates the class 1 translation termination release factors RF1 PrfA and RF2 PrfB on the glutamine residue of the universally conserved GGQ motif	ko:K02493	MTS,Methyltransf_31	GO:0003674,GO:0003824,GO:0005575,GO:0005622,GO:0005623,GO:0005737,GO:0005829,GO:0006412,GO:0006415,GO:0006464,GO:0006479,GO:0006518,GO:0006807,GO:0008150,GO:0008152,GO:0008168,GO:0008170,GO:0008213,GO:0008276,GO:0008757,GO:0009058,GO:0009059,GO:0009987,GO:0010467,GO:0010468,GO:0016043,GO:0016740,GO:0016741,GO:0018364,GO:0019222,GO:0019538,GO:0022411,GO:0032259,GO:0032984,GO:0034641,GO:0034645,GO:…
contig_1036_np1212_4087	J	-	SAM-dependent	ko:K06969	Methyltrans_SAM	-
contig_1036_np1212_4103	J	-	PELOTA RNA binding domain	-	PELOTA_1,PRTase_1	-
contig_1036_np1212_4125	J	rimL	COG1670 Acetyltransferases, including N-acetylases of ribosomal proteins	ko:K03817	Acetyltransf_3	GO:0003674,GO:0003824,GO:0004596,GO:0005575,GO:0005622,GO:0005623,GO:0005737,GO:0006464,GO:0006473,GO:0006474,GO:0006807,GO:0008080,GO:0008150,GO:0008152,GO:0008999,GO:0009987,GO:0010467,GO:0016407,GO:0016410,GO:0016740,GO:0016746,GO:0016747,GO:0017198,GO:0018193,GO:0018209,GO:0019538,GO:0030920,GO:0031365,GO:0034212,GO:0036211,GO:0043170,GO:0043412,GO:0043543,GO:0044237,GO:0044238,GO:0044260,GO:…
contig_1036_np1212_796	JKL	rhlE	DEAD-box RNA helicase involved in	ko:K11927	DEAD,Helicase_C	-
contig_1036_np1212_802	JKL	-	DEAD-box RNA helicase involved in ribosome assembly. Has RNA-dependent ATPase activity and unwinds double-stranded RNA	-	DEAD,Helicase_C	-
contig_1036_np1212_248	JM	-	Nucleotidyl transferase	ko:K00966,ko:K00992	NTP_transferase	GO:0000166,GO:0000270,GO:0000287,GO:0001882,GO:0001884,GO:0002134,GO:0003674,GO:0003824,GO:0005488,GO:0006022,GO:0006040,GO:0006082,GO:0006807,GO:0008150,GO:0008152,GO:0009254,GO:0009987,GO:0016740,GO:0016772,GO:0016779,GO:0019103,GO:0019752,GO:0030203,GO:0032549,GO:0032551,GO:0032553,GO:0032557,GO:0036094,GO:0043167,GO:0043168,GO:0043169,GO:0043170,GO:0043436,GO:0044237,GO:0044281,GO:0046872,GO:…
contig_1036_np1212_23	K	rho	Facilitates transcription termination by a mechanism that involves Rho binding to the nascent RNA, activation of Rho's RNA-dependent ATPase activity, and release of the mRNA from the DNA template	ko:K03628	ATP-synt_ab,Rho_N,Rho_RNA_bind	GO:0003674,GO:0003676,GO:0003723,GO:0005488,GO:0005515,GO:0005575,GO:0005622,GO:0005623,GO:0005737,GO:0005829,GO:0006139,GO:0006351,GO:0006353,GO:0006725,GO:0006807,GO:0008150,GO:0008152,GO:0009058,GO:0009059,GO:0009987,GO:0010467,GO:0016070,GO:0018130,GO:0019438,GO:0032774,GO:0034641,GO:0034645,GO:0034654,GO:0042802,GO:0043170,GO:0044237,GO:0044238,GO:0044249,GO:0044260,GO:0044271,GO:0044424,GO:…
contig_1036_np1212_30	K	algH	Belongs to the UPF0301 (AlgH) family	ko:K07735	DUF179	-
contig_1036_np1212_74	K	-	helix_turn_helix ASNC type	-	AsnC_trans_reg,HTH_24	-
contig_1036_np1212_84	K	dsdC	transcriptional regulator	ko:K03566	HTH_1,LysR_substrate	-
contig_1036_np1212_85	K	-	transcriptional regulator	ko:K02521	HTH_1,LysR_substrate	-
contig_1036_np1212_117	K	-	Transcriptional	-	HTH_6,SIS	-
contig_1036_np1212_136	K	-	transcriptional regulator	-	HTH_20	-
contig_1036_np1212_138	K	nsrR	Transcriptional regulator	ko:K13771	Rrf2	-
contig_1036_np1212_150	K	-	acetyltransferase	-	Acetyltransf_1,Acetyltransf_10,Acetyltransf_4	-
contig_1036_np1212_153	K	-	helix_turn_helix, Arsenical Resistance Operon Repressor	-	HTH_5	-
contig_1036_np1212_159	K	-	transcriptional regulator	-	RHH_1	-
contig_1036_np1212_161	K	-	Acetyltransferase (GNAT) family	-	Acetyltransf_7	-
contig_1036_np1212_195	K	-	TRANSCRIPTIONal	-	HTH_3	-
contig_1036_np1212_232	K	rpoD	Sigma factors are initiation factors that promote the attachment of RNA polymerase to specific initiation sites and are then released. This sigma factor is the primary sigma factor during exponential growth	ko:K03086	Sigma70_ner,Sigma70_r1_1,Sigma70_r1_2,Sigma70_r2,Sigma70_r3,Sigma70_r4	-
contig_1036_np1212_257	K	-	helix_turn_helix ASNC type	-	AsnC_trans_reg,HTH_24	-
contig_1036_np1212_258	K	-	IclR family transcriptional regulator	ko:K02624,ko:K13641,ko:K20539	HTH_IclR,IclR	-
contig_1036_np1212_262	K	-	transcriptional regulator	ko:K19337	HTH_6,SIS	-
contig_1036_np1212_280	K	metR	transcriptional regulator	ko:K03576	HTH_1,LysR_substrate	-
contig_1036_np1212_290	K	-	COG2197 Response regulator containing a CheY-like receiver domain and an HTH DNA-binding domain	-	GerE	-
contig_1036_np1212_324	K	-	COG0454 Histone acetyltransferase HPA2 and related acetyltransferases	-	Acetyltransf_1	-
contig_1036_np1212_349	K	-	helix_turn_helix multiple antibiotic resistance protein	-	MarR,MarR_2	-
contig_1036_np1212_353	K	gcvA	transcriptional regulator	ko:K03566	HTH_1,LysR_substrate	-
contig_1036_np1212_362	K	-	Acetyltransferase (GNAT) domain	-	Acetyltransf_1	-
contig_1036_np1212_365	K	-	Bacterial regulatory proteins, tetR family	-	TetR_N	-
contig_1036_np1212_414	K	-	LysR substrate binding domain	-	HTH_1,LysR_substrate	-
contig_1036_np1212_415	K	-	LysR substrate binding domain	-	HTH_1,LysR_substrate	-
contig_1036_np1212_424	K	MA20_39555	helix_turn_helix ASNC type	ko:K03719	AsnC_trans_reg,HTH_24,HTH_AsnC-type	-
contig_1036_np1212_432	K	-	Transcriptional	-	MerR_1	-
contig_1036_np1212_433	K	himA	This protein is one of the two subunits of integration host factor, a specific DNA-binding protein that functions in genetic recombination as well as in transcriptional and translational control	ko:K04764	Bac_DNA_binding	-
contig_1036_np1212_441	K	-	Transcriptional regulator, effector binding domain protein	ko:K13652	GyrI-like,HTH_18	-
contig_1036_np1212_460	K	-	LysR substrate binding domain	-	HTH_1,LysR_substrate	-
contig_1036_np1212_475	K	himD	This protein is one of the two subunits of integration host factor, a specific DNA-binding protein that functions in genetic recombination as well as in transcriptional and translational control	ko:K05788	Bac_DNA_binding	-
contig_1036_np1212_490	K	-	Acetyltransferase (GNAT) domain	-	Acetyltransf_1,Acetyltransf_7	-
contig_1036_np1212_504	K	-	COG0583 Transcriptional regulator	ko:K03566	HTH_1,LysR_substrate	-
contig_1036_np1212_518	K	-	Bacterial regulatory helix-turn-helix protein, lysR family	ko:K05596	HTH_1,LysR_substrate	-
contig_1036_np1212_538	K	HA62_00785	COG1802 Transcriptional regulators	-	FCD,GntR	-
contig_1036_np1212_584	K	-	HxlR-like helix-turn-helix	-	HxlR	-
contig_1036_np1212_595	K	-	Transcriptional regulator	-	AraC_binding,BLUF,HTH_18,Methyltransf_23,TPR_8	-
contig_1036_np1212_626	K	-	WHG domain	-	TetR_N,WHG	-
contig_1036_np1212_628	K	-	transcriptional regulator	ko:K15735	FCD,GntR	-
contig_1036_np1212_635	K	mcbR	FCD	-	FCD,GntR	-
contig_1036_np1212_647	K	-	Transcriptional regulator	ko:K03566	HTH_1,LysR_substrate	-
contig_1036_np1212_745	K	yobR	acetyltransferase	ko:K22476	Acetyltransf_1,Acetyltransf_10	GO:0003674,GO:0003824,GO:0004596,GO:0005575,GO:0005622,GO:0005623,GO:0006464,GO:0006473,GO:0006474,GO:0006807,GO:0008080,GO:0008150,GO:0008152,GO:0009987,GO:0010467,GO:0016407,GO:0016410,GO:0016740,GO:0016746,GO:0016747,GO:0019538,GO:0031248,GO:0031365,GO:0032991,GO:0034212,GO:0036211,GO:0043170,GO:0043412,GO:0043543,GO:0044237,GO:0044238,GO:0044260,GO:0044267,GO:0044424,GO:0044464,GO:0051604,GO:…
contig_1036_np1212_759	K	anr	transcriptional regulator	ko:K01420	HTH_Crp_2,cNMP_binding	-
contig_1036_np1212_789	K	algU	Belongs to the sigma-70 factor family. ECF subfamily	ko:K03088	Sigma70_r2,Sigma70_r4_2	-
contig_1036_np1212_797	K	-	transcriptional regulator	-	HTH_1,LysR_substrate	-
contig_1036_np1212_838	K	-	transcriptional regulator	-	Cupin_2,HTH_3	-
contig_1036_np1212_850	K	-	LysR family	-	HTH_1,LysR_substrate	-
contig_1036_np1212_855	K	-	Belongs to the sigma-70 factor family. ECF subfamily	ko:K03088	Sigma70_r2,Sigma70_r4_2	-
contig_1036_np1212_870	K	lexA	Represses a number of genes involved in the response to DNA damage (SOS response), including recA and lexA. In the presence of single-stranded DNA, RecA interacts with LexA causing an autocatalytic cleavage which disrupts the DNA-binding part of LexA, leading to derepression of the SOS regulon and eventually DNA repair	ko:K01356	LexA_DNA_bind,Peptidase_S24	-
contig_1036_np1212_887	K	-	transcriptional regulator	ko:K22042	HTH_20,HTH_5	-
contig_1036_np1212_955	K	tetR9	transcriptional regulator	ko:K09017	TetR_C_3,TetR_N	-
contig_1036_np1212_964	K	-	Bacterial regulatory proteins, gntR family	-	FCD,GntR	-
contig_1036_np1212_970	K	-	PFAM regulatory protein TetR	-	TetR_C_6,TetR_N	-
contig_1036_np1212_979	K	-	Cold-shock'	ko:K03704	CSD	-
contig_1036_np1212_994	K	-	helix_turn_helix multiple antibiotic resistance protein	-	MarR,MarR_2	-
contig_1036_np1212_1001	K	rpoN	Sigma factors are initiation factors that promote the attachment of RNA polymerase to specific initiation sites and are then released	ko:K03092	Sigma54_AID,Sigma54_CBD,Sigma54_DBD	-
contig_1036_np1212_1013	K	-	Belongs to the BolA IbaG family	-	BolA	-
contig_1036_np1212_1032	K	-	response regulator	ko:K07669	GerE,Response_reg	-
contig_1036_np1212_1046	K	cysB	in Escherichia coli this protein regulates cysteine biosynthesis by controlling expression of the cys regulon	ko:K13634	HTH_1,LysR_substrate	-
contig_1036_np1212_1058	K	-	Acetyltransferase (GNAT) domain	-	Acetyltransf_1,Acetyltransf_10,Acetyltransf_7	-
contig_1036_np1212_1089	K	-	Transcriptional	-	MerR,MerR-DNA-bind,MerR_1	-
contig_1036_np1212_1092	K	sigX	Belongs to the sigma-70 factor family. ECF subfamily	ko:K03088	Sigma70_r2,Sigma70_r4,Sigma70_r4_2	-
contig_1036_np1212_1103	K	-	helix_turn_helix, arabinose operon control protein	-	HTH_18	-
contig_1036_np1212_1107	K	-	COG1846 Transcriptional regulators	-	HTH_27,MarR,MarR_2	-
contig_1036_np1212_1111	K	-	LysR substrate binding domain	-	HTH_1,LysR_substrate	-
contig_1036_np1212_1116	K	paaX	phenylacetic acid degradation operon negative regulatory protein	ko:K02616	PaaX,PaaX_C	GO:0000976,GO:0000984,GO:0001017,GO:0001067,GO:0003674,GO:0003676,GO:0003677,GO:0003690,GO:0005488,GO:0006082,GO:0006139,GO:0006351,GO:0006355,GO:0006725,GO:0006805,GO:0006807,GO:0008150,GO:0008152,GO:0009056,GO:0009058,GO:0009059,GO:0009404,GO:0009407,GO:0009410,GO:0009636,GO:0009850,GO:0009852,GO:0009889,GO:0009890,GO:0009892,GO:0009987,GO:0010124,GO:0010467,GO:0010468,GO:0010556,GO:0010558,GO:…
contig_1036_np1212_1129	K	-	transcriptional regulator	ko:K05800	AsnC_trans_reg,HTH_24	-
contig_1036_np1212_1131	K	-	transcriptional regulatory protein	-	Transcrip_reg	-
contig_1036_np1212_1145	K	-	helix_turn_helix, Lux Regulon	-	GerE,Response_reg	-
contig_1036_np1212_1185	K	-	transcriptional regulator	-	MerR,MerR-DNA-bind,MerR_1	-
contig_1036_np1212_1192	K	-	transcriptional regulator	ko:K17737	HTH_1,LysR_substrate	-
contig_1036_np1212_1199	K	gabR_2	Transcriptional regulators containing a DNA-binding HTH domain and an aminotransferase domain (MocR family) and their eukaryotic orthologs	ko:K00375,ko:K05825	Aminotran_1_2,GntR	-
contig_1036_np1212_1206	K	-	NikR C terminal nickel binding domain	-	NikR_C,RHH_1	-
contig_1036_np1212_1210	K	aspT	transaminase activity	-	Aminotran_MocR	-
contig_1036_np1212_1225	K	-	Tetratricopeptide repeat	-	-	-
contig_1036_np1212_1234	K	-	AraC-like ligand binding domain	-	AraC_binding,HTH_AraC	-
contig_1036_np1212_1245	K	-	Bacterial regulatory proteins, tetR family	-	TetR_N	-
contig_1036_np1212_1249	K	cspA	COG1278 Cold shock proteins	ko:K03704	CSD	-
contig_1036_np1212_1266	K	-	Cold shock protein domain	ko:K03704	CSD	-
contig_1036_np1212_1283	K	-	Helix-turn-helix domain, rpiR family	-	HTH_6,SIS	-
contig_1036_np1212_1294	K	hutC	histidine utilization repressor	ko:K05836	GntR,UTRA	-
contig_1036_np1212_1313	K	-	helix_turn_helix, arabinose operon control protein	-	AraC_binding_2,HTH_18	-
contig_1036_np1212_1318	K	MA20_27200	helix_turn _helix lactose operon repressor	ko:K06145	LacI,Peripla_BP_3	-
contig_1036_np1212_1340	K	-	helix_turn_helix ASNC type	-	AsnC_trans_reg,HTH_24	-
contig_1036_np1212_1342	K	-	transcriptional regulator	-	HTH_1,LysR_substrate	-
contig_1036_np1212_1351	K	VV0993	Belongs to the P(II) protein family	-	-	-
contig_1036_np1212_1387	K	-	Histone acetyltransferase HPA2 and related acetyltransferases	-	Acetyltransf_1,Acetyltransf_10	-
contig_1036_np1212_1392	K	-	Bacterial regulatory proteins, lacI family	ko:K02529	LacI,Peripla_BP_1,Peripla_BP_3	-
contig_1036_np1212_1398	K	rbn-1	membrane	ko:K07058	Virul_fac_BrkB	-
contig_1036_np1212_1414	K	iscR	Regulates the transcription of several operons and genes involved in the biogenesis of Fe-S clusters and Fe-S-containing proteins	ko:K13643	Rrf2	-
contig_1036_np1212_1450	K	-	Cold shock protein domain	ko:K03704	CSD	-
contig_1036_np1212_1453	K	-	LysR substrate binding domain	-	HTH_1,LysR_substrate	-
contig_1036_np1212_1467	K	-	Transcriptional regulator, GntR family	-	FCD,GntR	-
contig_1036_np1212_1475	K	-	COG0583 Transcriptional regulator	-	HTH_1,LysR_substrate	-
contig_1036_np1212_1482	K	-	COG1802 Transcriptional regulators	-	FCD,GntR	-
contig_1036_np1212_1486	K	-	Acetyltransferase (GNAT) domain	-	-	-
contig_1036_np1212_1511	K	-	Facilitates transcription termination by a mechanism that involves Rho binding to the nascent RNA, activation of Rho's RNA-dependent ATPase activity, and release of the mRNA from the DNA template	ko:K03628	ATP-synt_ab	-
contig_1036_np1212_1516	K	-	TIGRFAM Addiction module antidote protein, HigA	ko:K21498	HTH_3	-
contig_1036_np1212_1547	K	-	Response regulator containing a CheY-like receiver domain and an HTH DNA-binding domain	ko:K07690	GerE,Response_reg	-
contig_1036_np1212_1578	K	-	LysR substrate binding domain	-	HTH_1,LysR_substrate	-
contig_1036_np1212_1587	K	-	HxlR-like helix-turn-helix	-	HxlR	-
contig_1036_np1212_1601	K	ybaQ	Helix-turn-helix XRE-family like proteins	ko:K21498	HTH_3	-
contig_1036_np1212_1604	K	-	Helix-turn-helix	ko:K21498	HTH_3	-
contig_1036_np1212_1616	K	-	sequence-specific DNA binding	-	HTH_3,HTH_31	-
contig_1036_np1212_1624	K	-	Transcriptional regulator	ko:K03566	HTH_1,LysR_substrate	GO:0001130,GO:0001131,GO:0003674,GO:0003676,GO:0003677,GO:0003700,GO:0005488,GO:0005575,GO:0005622,GO:0005623,GO:0005737,GO:0006139,GO:0006351,GO:0006355,GO:0006725,GO:0006807,GO:0008150,GO:0008152,GO:0009058,GO:0009059,GO:0009314,GO:0009411,GO:0009416,GO:0009628,GO:0009889,GO:0009987,GO:0010467,GO:0010468,GO:0010556,GO:0016070,GO:0018130,GO:0019219,GO:0019222,GO:0019438,GO:0031323,GO:0031326,GO:…
contig_1036_np1212_1669	K	-	LysR substrate binding domain	-	HTH_1,LysR_substrate	-
contig_1036_np1212_1673	K	-	transcriptional regulator	-	TetR_N	-
contig_1036_np1212_1679	K	-	Lrp/AsnC ligand binding domain	-	AsnC_trans_reg	-
contig_1036_np1212_1685	K	ydcN	Cupin domain	-	Cupin_2,HTH_3	-
contig_1036_np1212_1688	K	-	Transcriptional activator of acetoin glycerol metabolism	ko:K21405	GAF,HTH_30,HTH_8,Sigma54_activat	-
contig_1036_np1212_1695	K	-	LysR substrate binding domain	-	HTH_1,LysR_substrate	-
contig_1036_np1212_1720	K	-	Acetyltransferase (GNAT) domain	-	Acetyltransf_1	-
contig_1036_np1212_1727	K	-	AraC family transcriptional regulator	-	Arabinose_bd,HTH_18	-
contig_1036_np1212_1731	K	-	transcriptional regulator	ko:K03566	HTH_1,LysR_substrate	-
contig_1036_np1212_1763	K	-	Lrp/AsnC ligand binding domain	-	AsnC_trans_reg,HTH_24,HTH_AsnC-type	-
contig_1036_np1212_1775	K	-	LysR substrate binding domain	-	HTH_1,LysR_substrate	-
contig_1036_np1212_1808	K	-	Transcriptional regulator	-	HTH_3,HTH_31	-
contig_1036_np1212_1825	K	-	transcriptional regulator	-	TetR_N	-
contig_1036_np1212_1847	K	yddM	plasmid maintenance system antidote protein	ko:K21498	HTH_3	-
contig_1036_np1212_1862	K	-	Sigma-70, region 4	ko:K03088	Sigma70_r2,Sigma70_r4_2	-
contig_1036_np1212_1866	K	-	COG3093 Plasmid maintenance system antidote protein	ko:K21498	HTH_3	-
contig_1036_np1212_1905	K	mraZ	Belongs to the MraZ family	ko:K03925	MraZ	GO:0000976,GO:0001067,GO:0003674,GO:0003676,GO:0003677,GO:0003690,GO:0003700,GO:0005488,GO:0006355,GO:0008150,GO:0009889,GO:0009890,GO:0009892,GO:0010468,GO:0010556,GO:0010558,GO:0010605,GO:0010629,GO:0019219,GO:0019222,GO:0031323,GO:0031324,GO:0031326,GO:0031327,GO:0031333,GO:0043254,GO:0043565,GO:0044087,GO:0044212,GO:0045892,GO:0045934,GO:0048519,GO:0048523,GO:0050789,GO:0050794,GO:0051128,GO:…
contig_1036_np1212_1920	K	-	FCD	-	FCD,GntR	-
contig_1036_np1212_1935	K	nanR	Transcriptional repressor that controls expression of the genes required for the catabolism of sialic acids	ko:K22104	FCD,GntR	GO:0003674,GO:0003676,GO:0003677,GO:0005488,GO:0006139,GO:0006351,GO:0006725,GO:0006807,GO:0008150,GO:0008152,GO:0009058,GO:0009059,GO:0009987,GO:0010467,GO:0016070,GO:0018130,GO:0019438,GO:0032774,GO:0034641,GO:0034645,GO:0034654,GO:0043170,GO:0044237,GO:0044238,GO:0044249,GO:0044260,GO:0044271,GO:0046483,GO:0071704,GO:0090304,GO:0097159,GO:0097659,GO:1901360,GO:1901362,GO:1901363,GO:1901576
contig_1036_np1212_1953	K	-	COG0583 Transcriptional regulator	ko:K03566	HTH_1,LysR_substrate	-
contig_1036_np1212_1962	K	-	helix_turn_helix multiple antibiotic resistance protein	-	-	-
contig_1036_np1212_1965	K	-	Transcriptional	ko:K03719	AsnC_trans_reg,HTH_24	-
contig_1036_np1212_1980	K	fis	Activates ribosomal RNA transcription. Plays a direct role in upstream activation of rRNA promoters	ko:K03557	HTH_8	-
contig_1036_np1212_1991	K	-	Transcriptional regulator, MarR family	-	MarR,MarR_2	-
contig_1036_np1212_2000	K	-	Transcriptional regulator	-	HTH_11,WYL	-
contig_1036_np1212_2010	K	-	LysR substrate binding domain	-	HTH_1,LysR_substrate	-
contig_1036_np1212_2013	K	-	Ribbon-helix-helix protein, copG family	-	RHH_1	-
contig_1036_np1212_2016	K	-	sequence-specific DNA binding	-	HTH_3	-
contig_1036_np1212_2046	K	-	COG1167 Transcriptional regulators containing a DNA-binding HTH domain and an aminotransferase domain (MocR family) and their eukaryotic orthologs	-	Aminotran_1_2,GntR	-
contig_1036_np1212_2064	K	-	helix_turn_helix gluconate operon transcriptional repressor	-	Aminotran_1_2,GntR	-
contig_1036_np1212_2101	K	-	PFAM sigma-54 factor interaction domain-containing protein	ko:K11908,ko:K11914	HTH_8,Sigma54_activat	-
contig_1036_np1212_2116	K	-	Belongs to the ParB family	ko:K03497	KorB,KorB_C,ParBc	-
contig_1036_np1212_2122	K	-	Transcriptional regulator	-	HTH_IclR,IclR	-
contig_1036_np1212_2179	K	-	Transcriptional regulator	-	HTH_1,LysR_substrate	-
contig_1036_np1212_2191	K	-	transcriptional regulator	ko:K05800	AsnC_trans_reg,HTH_24	-
contig_1036_np1212_2192	K	-	Cold shock	-	CSD	-
contig_1036_np1212_2223	K	-	Cold-shock'	ko:K03704	CSD	-
contig_1036_np1212_2237	K	-	Transcriptional regulator	-	HTH_1,LysR_substrate	-
contig_1036_np1212_2248	K	-	helix_turn_helix gluconate operon transcriptional repressor	-	Aminotran_1_2,GntR	-
contig_1036_np1212_2252	K	-	COG3093 Plasmid maintenance system antidote protein	ko:K21498	HTH_3	-
contig_1036_np1212_2271	K	-	LysR substrate binding domain	-	HTH_1,LysR_substrate	-
contig_1036_np1212_2288	K	-	helix_turn_helix, mercury resistance	-	MerR_1	-
contig_1036_np1212_2289	K	-	sequence-specific DNA binding	-	AsnC_trans_reg,HTH_24,HTH_AsnC-type	-
contig_1036_np1212_2292	K	-	LysR substrate binding domain	-	HTH_1,LysR_substrate	-
contig_1036_np1212_2305	K	nusA	Participates in both transcription termination and antitermination	ko:K02600	HHH_5,KH_5,NusA_N,S1	-
contig_1036_np1212_2314	K	greA	Necessary for efficient RNA polymerase transcription elongation past template-encoded arresting sites. The arresting sites in DNA have the property of trapping a certain fraction of elongating RNA polymerases that pass through, resulting in locked ternary complexes. Cleavage of the nascent transcript by cleavage factors such as GreA or GreB allows the resumption of elongation from the new 3'termi…	ko:K03624	GreA_GreB,GreA_GreB_N	-
contig_1036_np1212_2366	K	-	Belongs to the sigma-70 factor family. ECF subfamily	ko:K03088	Sigma70_r2,Sigma70_r4_2	-
contig_1036_np1212_2370	K	-	Acetyltransferase (GNAT) domain	-	-	-
contig_1036_np1212_2373	K	-	Putative FMN-binding domain	ko:K07734	FMN_bind_2	-
contig_1036_np1212_2374	K	-	aminotransferase class I and II	ko:K00375,ko:K05825	Aminotran_1_2,GntR	-
contig_1036_np1212_2388	K	-	Bacterial transcriptional regulator	ko:K13641	HTH_IclR,IclR,SGL	-
contig_1036_np1212_2401	K	-	transcriptional regulator	-	TetR_N	-
contig_1036_np1212_2403	K	-	Acetyltransferase (GNAT) domain	-	Acetyltransf_10	-
contig_1036_np1212_2407	K	argR	transcriptional regulator	ko:K21825,ko:K21826	DJ-1_PfpI,HTH_18	-
contig_1036_np1212_2415	K	-	Putative DNA-binding domain	-	AlbA_2	-
contig_1036_np1212_2434	K	lrp	AsnC family transcriptional regulator	ko:K03719	AsnC_trans_reg,HTH_24,HTH_AsnC-type	-
contig_1036_np1212_2458	K	cspC	Excalibur calcium-binding domain	-	CSD,Excalibur	-
contig_1036_np1212_2468	K	-	Catalyzes an amino-pyrimidine hydrolysis reaction at the C5' of the pyrimidine moiety of thiamine compounds, a reaction that is part of a thiamine salvage pathway. Thus, catalyzes the conversion of 4-amino-5-aminomethyl-2-methylpyrimidine to 4-amino- 5-hydroxymethyl-2-methylpyrimidine (HMP)	ko:K03707	TENA_THI-4	-
contig_1036_np1212_2471	K	-	transcriptional regulator	-	HTH_1,LysR_substrate	-
contig_1036_np1212_2513	K	-	H-NS histone family	-	Histone_HNS	-
contig_1036_np1212_2586	K	-	COG1522 Transcriptional regulators	ko:K03719	AsnC_trans_reg,HTH_24,HTH_AsnC-type	-
contig_1036_np1212_2598	K	-	transcriptional regulator	-	Aminotran_1_2,GntR	-
contig_1036_np1212_2604	K	betI	Repressor involved in choline regulation of the bet genes	ko:K02167	TetR_C_6,TetR_N	-
contig_1036_np1212_2610	K	-	Cro/C1-type HTH DNA-binding domain	-	HTH_26	-
contig_1036_np1212_2614	K	-	transcriptional regulator	ko:K21826	DJ-1_PfpI,HTH_18	-
contig_1036_np1212_2647	K	-	transcriptional	-	FCD,GntR	-
contig_1036_np1212_2665	K	rpoS	COG0568 DNA-directed RNA polymerase, sigma subunit (sigma70 sigma32)	ko:K03087	Sigma70_r1_2,Sigma70_r2,Sigma70_r3,Sigma70_r4	GO:0000988,GO:0000990,GO:0001000,GO:0001121,GO:0001123,GO:0003674,GO:0005488,GO:0005515,GO:0005575,GO:0005622,GO:0005623,GO:0005737,GO:0006139,GO:0006351,GO:0006352,GO:0006355,GO:0006725,GO:0006807,GO:0008150,GO:0008152,GO:0009058,GO:0009059,GO:0009889,GO:0009987,GO:0010467,GO:0010468,GO:0010556,GO:0016070,GO:0016987,GO:0018130,GO:0019219,GO:0019222,GO:0019438,GO:0019899,GO:0031323,GO:0031326,GO:…
contig_1036_np1212_2666	K	rpoS	RNA polymerase sigma factor RpoS	ko:K03087	Sigma70_r1_2,Sigma70_r2,Sigma70_r3,Sigma70_r4	GO:0000988,GO:0000990,GO:0001000,GO:0001121,GO:0001123,GO:0003674,GO:0005488,GO:0005515,GO:0005575,GO:0005622,GO:0005623,GO:0005737,GO:0006139,GO:0006351,GO:0006352,GO:0006355,GO:0006725,GO:0006807,GO:0008150,GO:0008152,GO:0009058,GO:0009059,GO:0009889,GO:0009987,GO:0010467,GO:0010468,GO:0010556,GO:0016070,GO:0016987,GO:0018130,GO:0019219,GO:0019222,GO:0019438,GO:0019899,GO:0031323,GO:0031326,GO:…
contig_1036_np1212_2698	K	fur	Belongs to the Fur family	ko:K03711	FUR	-
contig_1036_np1212_2744	K	-	LysR substrate binding domain	-	HTH_1,LysR_substrate	-
contig_1036_np1212_2753	K	rapA	Transcription regulator that activates transcription by stimulating RNA polymerase (RNAP) recycling in case of stress conditions such as supercoiled DNA or high salt concentrations. Probably acts by releasing the RNAP, when it is trapped or immobilized on tightly supercoiled DNA. Does not activate transcription on linear DNA. Probably not involved in DNA repair	ko:K03580	Helicase_C,RapA_C,SNF2_N	GO:0000166,GO:0001000,GO:0003674,GO:0003676,GO:0003824,GO:0004386,GO:0005488,GO:0005515,GO:0005524,GO:0005575,GO:0005622,GO:0005623,GO:0005737,GO:0006139,GO:0006351,GO:0006355,GO:0006725,GO:0006807,GO:0008144,GO:0008150,GO:0008152,GO:0009058,GO:0009059,GO:0009889,GO:0009891,GO:0009893,GO:0009987,GO:0010467,GO:0010468,GO:0010556,GO:0010557,GO:0010604,GO:0010628,GO:0016070,GO:0016462,GO:0016787,GO:…
contig_1036_np1212_2758	K	higA	transcriptional regulator	ko:K18831	HTH_3	GO:0006355,GO:0008150,GO:0009889,GO:0010468,GO:0010556,GO:0019219,GO:0019222,GO:0031323,GO:0031326,GO:0050789,GO:0050794,GO:0051171,GO:0051252,GO:0060255,GO:0065007,GO:0080090,GO:1903506,GO:2000112,GO:2001141
contig_1036_np1212_2771	K	-	Mobile mystery protein A	-	HTH_3	-
contig_1036_np1212_2772	K	-	LysR substrate binding domain	-	HTH_1,LysR_substrate	-
contig_1036_np1212_2775	K	-	COG2207 AraC-type DNA-binding domain-containing proteins	-	Cupin_2,HTH_18	-
contig_1036_np1212_2779	K	-	Transcriptional regulator	-	HTH_18	-
contig_1036_np1212_2794	K	-	Transcriptional regulator, gntR family	ko:K11475	FCD,GntR	-
contig_1036_np1212_2804	K	-	Antitoxin component of bacterial toxin-antitoxin system, MqsA	ko:K07726	MqsA_antitoxin	-
contig_1036_np1212_2810	K	rpoA	DNA-dependent RNA polymerase catalyzes the transcription of DNA into RNA using the four ribonucleoside triphosphates as substrates	ko:K03040	RNA_pol_A_CTD,RNA_pol_A_bac,RNA_pol_L	-
contig_1036_np1212_2841	K	-	FCD	ko:K11474	FCD,GntR	-
contig_1036_np1212_2856	K	greB	Necessary for efficient RNA polymerase transcription elongation past template-encoded arresting sites. The arresting sites in DNA have the property of trapping a certain fraction of elongating RNA polymerases that pass through, resulting in locked ternary complexes. Cleavage of the nascent transcript by cleavage factors such as GreA or GreB allows the resumption of elongation from the new 3'termi…	ko:K04760	GreA_GreB,GreA_GreB_N	-
contig_1036_np1212_2892	K	-	Protein of unknown function (DUF1294)	-	DUF1294	-
contig_1036_np1212_2914	K	-	Transcriptional regulator, LysR family	-	HTH_1,LysR_substrate	-
contig_1036_np1212_2942	K	nusB	Involved in transcription antitermination. Required for transcription of ribosomal RNA (rRNA) genes. Binds specifically to the boxA antiterminator sequence of the ribosomal RNA (rrn) operons	ko:K03625	NusB	-
contig_1036_np1212_2947	K	nrdR	Negatively regulates transcription of bacterial ribonucleotide reductase nrd genes and operons by binding to NrdR- boxes	ko:K07738	ATP-cone	GO:0000166,GO:0003674,GO:0003676,GO:0003677,GO:0003690,GO:0005488,GO:0005524,GO:0006355,GO:0008144,GO:0008150,GO:0009889,GO:0009890,GO:0009892,GO:0010468,GO:0010556,GO:0010558,GO:0010605,GO:0010629,GO:0017076,GO:0019219,GO:0019222,GO:0030554,GO:0031323,GO:0031324,GO:0031326,GO:0031327,GO:0032553,GO:0032555,GO:0032559,GO:0035639,GO:0036094,GO:0043167,GO:0043168,GO:0045892,GO:0045934,GO:0048519,GO:…
contig_1036_np1212_2974	K	ywbI	Transcriptional regulator	-	HTH_1,LysR_substrate	GO:0000976,GO:0000984,GO:0000986,GO:0000987,GO:0001017,GO:0001067,GO:0003674,GO:0003676,GO:0003677,GO:0003690,GO:0005488,GO:0005575,GO:0005622,GO:0005623,GO:0005737,GO:0005829,GO:0043565,GO:0044212,GO:0044424,GO:0044444,GO:0044464,GO:0097159,GO:1901363,GO:1990837
contig_1036_np1212_3021	K	MA20_19670	COG2197 Response regulator containing a CheY-like receiver domain and an HTH DNA-binding domain	-	GerE,Response_reg	GO:0003674,GO:0003676,GO:0003677,GO:0005488,GO:0006355,GO:0008150,GO:0009889,GO:0010468,GO:0010556,GO:0019219,GO:0019222,GO:0031323,GO:0031326,GO:0050789,GO:0050794,GO:0051171,GO:0051252,GO:0060255,GO:0065007,GO:0080090,GO:0097159,GO:1901363,GO:1903506,GO:2000112,GO:2001141
contig_1036_np1212_3023	K	rimI	This enzyme acetylates the N-terminal alanine of ribosomal protein S18	ko:K03789	Acetyltransf_1	-
contig_1036_np1212_3050	K	rpoC	DNA-dependent RNA polymerase catalyzes the transcription of DNA into RNA using the four ribonucleoside triphosphates as substrates	ko:K03046	RNA_pol_Rpb1_1,RNA_pol_Rpb1_2,RNA_pol_Rpb1_3,RNA_pol_Rpb1_4,RNA_pol_Rpb1_5	-
contig_1036_np1212_3051	K	rpoB	DNA-dependent RNA polymerase catalyzes the transcription of DNA into RNA using the four ribonucleoside triphosphates as substrates	ko:K03043	RNA_pol_Rpb2_1,RNA_pol_Rpb2_2,RNA_pol_Rpb2_3,RNA_pol_Rpb2_45,RNA_pol_Rpb2_6,RNA_pol_Rpb2_7	-
contig_1036_np1212_3056	K	nusG	Participates in transcription elongation, termination and antitermination	ko:K02601	KOW,NusG	-
contig_1036_np1212_3059	K	coaX	Catalyzes the phosphorylation of pantothenate (Pan), the first step in CoA biosynthesis	ko:K03525	Pan_kinase	-
contig_1036_np1212_3082	K	dmlR_8	Transcriptional regulator, LysR	ko:K10918,ko:K18900	HTH_1,LysR_substrate	-
contig_1036_np1212_3116	K	-	PFAM Prophage CP4-57 regulatory	ko:K07733	Phage_AlpA	-
contig_1036_np1212_3123	K	-	Putative ATP-dependent DNA helicase recG C-terminal	ko:K03655	AlbA_2,HATPase_c_4	-
contig_1036_np1212_3135	K	-	sequence-specific DNA binding	-	HTH_3	-
contig_1036_np1212_3142	K	-	Helix-turn-helix	ko:K07726	HTH_3	-
contig_1036_np1212_3144	K	-	helix-turn-helix domain protein	-	HTH_19,HTH_3,Peptidase_M78	-
contig_1036_np1212_3155	K	-	Ribbon-helix-helix protein, copG family	-	RHH_1	-
contig_1036_np1212_3161	K	-	DJ-1/PfpI family	-	DJ-1_PfpI,HTH_18	-
contig_1036_np1212_3166	K	-	AraC-like ligand binding domain	-	AraC_binding,HTH_18	-
contig_1036_np1212_3179	K	pspF	Magnesium chelatase, subunit ChlI	ko:K03974	HTH_8,Sigma54_activat	-
contig_1036_np1212_3191	K	-	Helix-turn-helix	ko:K21498	HTH_3	GO:0008150,GO:0009636,GO:0042221,GO:0050896
contig_1036_np1212_3193	K	-	Transcriptional regulatory protein, C terminal	ko:K11329	Response_reg,Trans_reg_C	-
contig_1036_np1212_3198	K	-	COG0583 Transcriptional regulator	-	HTH_1,LysR_substrate	-
contig_1036_np1212_3209	K	-	transcriptional regulators	-	HTH_20	-
contig_1036_np1212_3239	K	glnK	Belongs to the P(II) protein family	ko:K04751,ko:K04752	P-II	-
contig_1036_np1212_3241	K	-	transcriptional regulator	ko:K07662	Response_reg,Trans_reg_C	-
contig_1036_np1212_3255	K	-	Cold shock protein	ko:K03704	CSD	-
contig_1036_np1212_3256	K	-	Transcriptional regulator, LysR family	-	HTH_1,LysR_substrate	-
contig_1036_np1212_3258	K	-	helix_turn_helix isocitrate lyase regulation	-	HTH_IclR,IclR	-
contig_1036_np1212_3280	K	-	Bacterial antitoxin of ParD toxin-antitoxin type II system and RHH	ko:K07746	ParD_antitoxin	-
contig_1036_np1212_3291	K	-	TipAS antibiotic-recognition domain	-	TipAS	-
contig_1036_np1212_3301	K	-	COG0583 Transcriptional regulator	-	HTH_1,LysR_substrate	-
contig_1036_np1212_3303	K	-	helix_turn_helix ASNC type	ko:K05800	AsnC_trans_reg,HTH_24	-
contig_1036_np1212_3306	K	-	Bacterial regulatory proteins, tetR family	-	TetR_N	-
contig_1036_np1212_3310	K	-	LysR substrate binding domain	-	HTH_1,LysR_substrate	-
contig_1036_np1212_3327	K	rpoH	Sigma factors are initiation factors that promote the attachment of RNA polymerase to specific initiation sites and are then released. This sigma factor is involved in regulation of expression of heat shock genes	ko:K03089	Sigma70_r1_2,Sigma70_r2,Sigma70_r4	-
contig_1036_np1212_3341	K	tcsR	PFAM response regulator receiver, regulatory protein LuxR	-	GerE,Response_reg	-
contig_1036_np1212_3346	K	-	Transcriptional	ko:K03719	AsnC_trans_reg,HTH_24,HTH_AsnC-type	-
contig_1036_np1212_3350	K	-	Belongs to the Fur family	ko:K09823	FUR	-
contig_1036_np1212_3361	K	oxyR	transcriptional regulator	ko:K04761	HTH_1,LysR_substrate	-
contig_1036_np1212_3364	K	-	helix_turn_helix, mercury resistance	ko:K13638	MerR,MerR-DNA-bind,MerR_1	-
contig_1036_np1212_3385	K	-	Acetyltransferase (GNAT) family	-	Acetyltransf_1	-
contig_1036_np1212_3408	K	parB	Belongs to the ParB family	ko:K03497	ParBc	-
contig_1036_np1212_3425	K	-	PFAM Helix-turn-helix	-	HTH_3	-
contig_1036_np1212_3436	K	-	PFAM GCN5-related N-acetyltransferase	-	Acetyltransf_10	-
contig_1036_np1212_3441	K	-	HTH domain	-	HTH_11,WYL	-
contig_1036_np1212_3444	K	-	cyclic nucleotide-binding	ko:K10914	HTH_Crp_2,cNMP_binding	-
contig_1036_np1212_3462	K	-	helix_turn _helix lactose operon repressor	ko:K06145	LacI,Peripla_BP_3	-
contig_1036_np1212_3463	K	-	Bacterial regulatory proteins, tetR family	-	TetR_N	-
contig_1036_np1212_3470	K	-	FCD	-	FCD,GntR	-
contig_1036_np1212_3486	K	-	Transcriptional regulator, TrmB	-	TrmB	-
contig_1036_np1212_3491	K	-	Cold shock protein	ko:K03704	CSD	-
contig_1036_np1212_3504	K	VVA1240	PFAM regulatory protein AsnC Lrp family	-	AsnC_trans_reg,HTH_24,HTH_AsnC-type	-
contig_1036_np1212_3511	K	-	transcriptional regulator	ko:K19337	HTH_6,SIS	-
contig_1036_np1212_3554	K	yddM	plasmid maintenance system antidote protein	ko:K21498	HTH_3	-
contig_1036_np1212_3589	K	-	Transcriptional regulator	ko:K22041	TetR_N	-
contig_1036_np1212_3609	K	-	Transcriptional regulator	-	FCD,GntR	-
contig_1036_np1212_3621	K	-	Transcriptional	-	HTH_6,SIS	-
contig_1036_np1212_3643	K	-	Transcriptional regulatory protein, C terminal	ko:K02483,ko:K07774	Response_reg,Trans_reg_C	-
contig_1036_np1212_3647	K	-	LysR substrate binding domain	-	HTH_1,LysR_substrate	-
contig_1036_np1212_3651	K	-	COG0454 Histone acetyltransferase HPA2 and related acetyltransferases	-	Acetyltransf_1	-
contig_1036_np1212_3656	K	-	LysR substrate binding domain	-	HTH_1,LysR_substrate	-
contig_1036_np1212_3669	K	oruR	Arabinose-binding domain of AraC transcription regulator, N-term	-	Arabinose_bd,HTH_18	-
contig_1036_np1212_3674	K	ysnE	Acetyltransferase (GNAT) domain	ko:K03829	Acetyltransf_1	GO:0003674,GO:0003824,GO:0004596,GO:0005575,GO:0005622,GO:0005623,GO:0006464,GO:0006473,GO:0006474,GO:0006807,GO:0008080,GO:0008150,GO:0008152,GO:0009987,GO:0010467,GO:0016407,GO:0016410,GO:0016740,GO:0016746,GO:0016747,GO:0019538,GO:0031248,GO:0031365,GO:0032991,GO:0034212,GO:0036211,GO:0043170,GO:0043412,GO:0043543,GO:0044237,GO:0044238,GO:0044260,GO:0044267,GO:0044424,GO:0044464,GO:0051604,GO:…
contig_1036_np1212_3680	K	bauR	transcriptional regulator	ko:K21699	HTH_1,LysR_substrate	-
contig_1036_np1212_3703	K	-	accessory protein	ko:K06959	HHH_3,S1,Tex_N,Tex_YqgF	-
contig_1036_np1212_3748	K	-	FCD	-	FCD,GntR	-
contig_1036_np1212_3757	K	-	transcriptional regulator	-	MarR,MarR_2	-
contig_1036_np1212_3765	K	rpoZ	Promotes RNA polymerase assembly. Latches the N- and C- terminal regions of the beta' subunit thereby facilitating its interaction with the beta and alpha subunits	ko:K03060	RNA_pol_Rpb6	-
contig_1036_np1212_3772	K	-	Belongs to the Rsd AlgQ family	ko:K07740	Rsd_AlgQ	-
contig_1036_np1212_3777	K	-	MarR family	-	Acetyltransf_1,MarR,MarR_2	-
contig_1036_np1212_3779	K	-	AraC-like ligand binding domain	-	AraC_binding,HTH_18,HTH_AraC	-
contig_1036_np1212_3797	K	-	YcdC-like protein, C-terminal region	ko:K09017	TetR_C_3,TetR_N	-
contig_1036_np1212_3803	K	-	Trp repressor protein	ko:K03720	Trp_repressor	-
contig_1036_np1212_3807	K	soxR	redox-sensitive transcriptional activator SoxR	ko:K13639	MerR,MerR-DNA-bind,MerR_1	-
contig_1036_np1212_3814	K	-	TIGRFAM Addiction module antidote protein, HigA	ko:K21498	HTH_3	-
contig_1036_np1212_3817	K	soxR	redox-sensitive transcriptional activator SoxR	ko:K13639	MerR,MerR-DNA-bind,MerR_1	-
contig_1036_np1212_3833	K	pdhR	transcriptional regulator	ko:K05799	FCD,GntR	-
contig_1036_np1212_3845	K	-	2TM domain	-	2TM,HTH_3	-
contig_1036_np1212_3847	K	-	helix_turn_helix multiple antibiotic resistance protein	-	MarR_2	-
contig_1036_np1212_3858	K	-	helix_turn_helix ASNC type	-	AsnC_trans_reg,HTH_24	-
contig_1036_np1212_3874	K	-	AsnC family	ko:K03719	AsnC_trans_reg,HTH_AsnC-type	-
contig_1036_np1212_3881	K	-	COG2207 AraC-type DNA-binding domain-containing proteins	-	HTH_18	-
contig_1036_np1212_3882	K	MA20_09785	Helix-turn-helix XRE-family like proteins	-	Cupin_2,HTH_3,HTH_31	-
contig_1036_np1212_3905	K	-	transcriptional regulator	-	FCD,GntR	-
contig_1036_np1212_3910	K	-	transcriptional regulator	ko:K03566	HTH_1,LysR_substrate	-
contig_1036_np1212_3919	K	-	Sigma-70, region 4	ko:K03088	Sigma70_r2,Sigma70_r4_2	-
contig_1036_np1212_3929	K	fliA	Sigma factors are initiation factors that promote the attachment of RNA polymerase to specific initiation sites and are then released. This sigma factor controls the expression of flagella-related genes	ko:K02405	Sigma70_r2,Sigma70_r3,Sigma70_r4	-
contig_1036_np1212_3937	K	-	Flagellar regulatory protein FleQ	ko:K10941	FleQ,HTH_8,Sigma54_activat	-
contig_1036_np1212_3957	K	-	Transcriptional	-	HTH_6,SIS	-
contig_1036_np1212_3965	K	-	Catalyzes an amino-pyrimidine hydrolysis reaction at the C5' of the pyrimidine moiety of thiamine compounds, a reaction that is part of a thiamine salvage pathway	ko:K03707	TENA_THI-4	-
contig_1036_np1212_3966	K	-	helix_turn_helix ASNC type	-	AsnC_trans_reg,HTH_AsnC-type	-
contig_1036_np1212_3974	K	-	transcriptional regulator	ko:K03566	HTH_1,LysR_substrate	-
contig_1036_np1212_4001	K	-	Acetyltransferase (GNAT) domain	-	Acetyltransf_10	-
contig_1036_np1212_4021	K	-	HxlR-like helix-turn-helix	-	HxlR	-
contig_1036_np1212_4045	K	-	Bacterial regulatory helix-turn-helix protein, lysR family	-	HTH_1,LysR_substrate	-
contig_1036_np1212_4061	K	-	AraC-type transcriptional regulator N-terminus	-	AraC_N,HTH_18,HTH_AraC	-
contig_1036_np1212_4091	K	-	Cupin 2 conserved barrel domain protein	-	Cupin_2,HTH_3	-
contig_1036_np1212_4099	K	ybaO	helix_turn_helix ASNC type	ko:K03719,ko:K05800	AsnC_trans_reg,HTH_24,HTH_AsnC-type	-
contig_1036_np1212_4116	K	-	COG0454 Histone acetyltransferase HPA2 and related acetyltransferases	-	Acetyltransf_1	-
contig_1036_np1212_4123	K	-	Cupin	-	Cupin_6,HTH_18	-
contig_1036_np1212_4131	K	-	Transcriptional regulator, AraC family	ko:K07506,ko:K13652	GyrI-like,HTH_18	-
contig_1036_np1212_4155	K	glpR	transcriptional regulator	ko:K02444	DeoRC,HTH_DeoR	GO:0000976,GO:0000984,GO:0000986,GO:0000987,GO:0001017,GO:0001067,GO:0003674,GO:0003676,GO:0003677,GO:0003690,GO:0005488,GO:0006355,GO:0008150,GO:0009889,GO:0009890,GO:0009892,GO:0010468,GO:0010556,GO:0010558,GO:0010605,GO:0010629,GO:0019219,GO:0019222,GO:0031323,GO:0031324,GO:0031326,GO:0031327,GO:0043565,GO:0044212,GO:0045892,GO:0045934,GO:0048519,GO:0048523,GO:0050789,GO:0050794,GO:0051171,GO:…
contig_1036_np1212_871	KL	dinG	helicase	ko:K03722	DEAD,DEAD_2,Helicase_C_2,ResIII	-
contig_1036_np1212_3074	KL	ada	Cysteine methyltransferase	ko:K10778	DNA_binding_1,HTH_18,Methyltransf_1N	-
contig_1036_np1212_2164	KLT	-	Sulfatase-modifying factor enzyme 1	-	FGE-sulfatase,Pkinase	-
contig_1036_np1212_2245	KLT	ybeQ	Sel1-like repeats.	ko:K07126	Sel1	-
contig_1036_np1212_3018	KLT	-	serine threonine protein kinase	ko:K12132	CHASE2,HAMP,HEAT_2,Pkinase,sCache_3_2	-
contig_1036_np1212_3019	KLT	-	Protein tyrosine kinase	ko:K12132	DUF4384,Pkinase	-
contig_1036_np1212_4059	KLT	-	serine threonine protein kinase	-	Kdo	-
contig_1036_np1212_1971	KNT	-	COG2202 FOG PAS PAC domain	ko:K03406,ko:K07315	MCPsignal,PAS,PAS_9,SpoIIE	-
contig_1036_np1212_897	KT	-	Phage shock protein A (IM30), suppresses sigma54-dependent transcription	-	PspA_IM30	-
contig_1036_np1212_1018	KT	-	Transcriptional regulator containing PAS AAA-type ATPase and DNA-binding	-	HTH_8,PAS,PAS_8,Sigma54_activat	-
contig_1036_np1212_1566	KT	-	HD domain	-	HD_4	-
contig_1036_np1212_1816	KT	relA	In eubacteria ppGpp (guanosine 3'-diphosphate 5-' diphosphate) is a mediator of the stringent response that coordinates a variety of cellular activities in response to changes in nutritional abundance	ko:K00951	ACT_4,HD_4,RelA_SpoT,TGS	-
contig_1036_np1212_2126	KT	umuD	Peptidase S24-like	ko:K03503	Peptidase_S24	GO:0000731,GO:0003674,GO:0003676,GO:0003677,GO:0003697,GO:0003824,GO:0003887,GO:0005488,GO:0005515,GO:0005575,GO:0005622,GO:0005623,GO:0006139,GO:0006259,GO:0006281,GO:0006301,GO:0006725,GO:0006807,GO:0006950,GO:0006974,GO:0007154,GO:0008094,GO:0008150,GO:0008152,GO:0009058,GO:0009059,GO:0009355,GO:0009432,GO:0009605,GO:0009987,GO:0009991,GO:0016462,GO:0016740,GO:0016772,GO:0016779,GO:0016787,GO:…
contig_1036_np1212_2962	KT	norR	transcriptional regulator	ko:K12266	GAF,Sigma54_activat	GO:0000976,GO:0000984,GO:0001017,GO:0001067,GO:0001130,GO:0001150,GO:0001151,GO:0001158,GO:0003674,GO:0003676,GO:0003677,GO:0003690,GO:0003700,GO:0005488,GO:0005506,GO:0005515,GO:0006355,GO:0008150,GO:0008198,GO:0009889,GO:0009891,GO:0009893,GO:0010468,GO:0010556,GO:0010557,GO:0010604,GO:0010628,GO:0019219,GO:0019222,GO:0031323,GO:0031325,GO:0031326,GO:0031328,GO:0031334,GO:0035326,GO:0042802,GO:…
contig_1036_np1212_3071	KT	dpiA	transcriptional regulatory protein	ko:K02475,ko:K07702	CitT,Response_reg	GO:0000156,GO:0000160,GO:0003674,GO:0003676,GO:0003677,GO:0005488,GO:0006355,GO:0007154,GO:0007165,GO:0008150,GO:0009889,GO:0009987,GO:0010468,GO:0010556,GO:0019219,GO:0019222,GO:0023052,GO:0031323,GO:0031326,GO:0035556,GO:0050789,GO:0050794,GO:0050896,GO:0051171,GO:0051252,GO:0051716,GO:0060089,GO:0060255,GO:0065007,GO:0080090,GO:0097159,GO:1901363,GO:1903506,GO:2000112,GO:2001141
contig_1036_np1212_3176	KT	pspC	PspC domain	ko:K03973	PspC	GO:0005575,GO:0005623,GO:0005886,GO:0008150,GO:0009889,GO:0009891,GO:0009893,GO:0010556,GO:0010557,GO:0010604,GO:0016020,GO:0019222,GO:0044464,GO:0048518,GO:0050789,GO:0060255,GO:0065007,GO:0071944
contig_1036_np1212_3178	KT	-	Phage shock protein A	ko:K03969	PspA_IM30	-
contig_1036_np1212_3632	KT	-	Periplasmic binding protein domain	-	HATPase_c,Peripla_BP_3	-
contig_1036_np1212_3766	KT	-	In eubacteria ppGpp (guanosine 3'-diphosphate 5-' diphosphate) is a mediator of the stringent response that coordinates a variety of cellular activities in response to changes in nutritional abundance	ko:K01139	ACT_4,HD_4,RelA_SpoT,TGS	-
contig_1036_np1212_4102	KT	-	Periplasmic binding protein domain	-	HATPase_c,Peripla_BP_3	-
contig_1036_np1212_16	L	rep	it can initiate unwinding at a nick in the DNA. It binds to the single-stranded DNA and acts in a progressive fashion along the DNA in the 3' to 5' direction	ko:K03656	UvrD-helicase,UvrD_C	-
contig_1036_np1212_17	L	nudE	COG0494 NTP pyrophosphohydrolases including oxidative damage repair enzymes	ko:K08312	NUDIX	-
contig_1036_np1212_29	L	-	Could be a nuclease involved in processing of the 5'-end of pre-16S rRNA	ko:K07447	RuvX	-
contig_1036_np1212_48	L	priA	Involved in the restart of stalled replication forks. Recognizes and binds the arrested nascent DNA chain at stalled replication forks. It can open the DNA duplex, via its helicase activity, and promote assembly of the primosome and loading of the major replicative helicase DnaB onto DNA	ko:K04066	DEAD,Helicase_C,ResIII	-
contig_1036_np1212_79	L	-	Belongs to the DEAD box helicase family	-	DEAD,Helicase_C	-
contig_1036_np1212_101	L	-	Transposase IS200 like	-	-	-
contig_1036_np1212_102	L	-	COG3344 Retron-type reverse transcriptase	-	GIIM,RVT_1	-
contig_1036_np1212_106	L	-	Transposase DDE domain group 1	-	DDE_Tnp_1_4	-
contig_1036_np1212_160	L	-	Retron-type reverse transcriptase	-	GIIM,RVT_1	-
contig_1036_np1212_164	L	-	Retron-type reverse transcriptase	-	GIIM,RVT_1	-
contig_1036_np1212_168	L	-	COG1943 Transposase and inactivated derivatives	-	-	-
contig_1036_np1212_169	L	-	IstB-like ATP binding protein	-	IstB_IS21,IstB_IS21_ATP	-
contig_1036_np1212_171	L	-	COG3344 Retron-type reverse transcriptase	-	GIIM,RVT_1	-
contig_1036_np1212_186	L	-	3' exoribonuclease, RNase T-like	ko:K10906	DUF5051,Exonuc_VIII	-
contig_1036_np1212_191	L	-	Toprim-like	-	Toprim_2	-
contig_1036_np1212_211	L	gpV	Baseplate assembly protein	-	Phage_base_V	-
contig_1036_np1212_231	L	-	Belongs to the 'phage' integrase family	-	Arm-DNA-bind_3,Phage_integrase	-
contig_1036_np1212_233	L	dnaG	RNA polymerase that catalyzes the synthesis of short RNA molecules used as primers for DNA polymerase during DNA replication	ko:K02316	DnaB_bind,DnaG_DnaB_bind,Toprim_2,Toprim_4,Toprim_N,zf-CHC2	-
contig_1036_np1212_270	L	-	Transposase DDE domain group 1	-	DDE_Tnp_1_4	-
contig_1036_np1212_284	L	rnt	Trims short 3' overhangs of a variety of RNA species, leaving a one or two nucleotide 3' overhang. Responsible for the end-turnover of tRNA specifically removes the terminal AMP residue from uncharged tRNA (tRNA-C-C-A). Also appears to be involved in tRNA biosynthesis	ko:K03683	RNase_T	-
contig_1036_np1212_298	L	-	Has polymerase, DNA-binding and 3'-5' exonuclease activities. In Aeropyrum pernix this protein is sensitive to aphidicolin and stable at 95 C	ko:K02336	DNA_pol_B,DNA_pol_B_exo1	-
contig_1036_np1212_299	L	-	Has polymerase, DNA-binding and 3'-5' exonuclease activities. In Aeropyrum pernix this protein is sensitive to aphidicolin and stable at 95 C	ko:K02336	DNA_pol_B,DNA_pol_B_exo1	-
contig_1036_np1212_379	L	dnaQ	DNA polymerase III is a complex, multichain enzyme responsible for most of the replicative synthesis in bacteria. The epsilon subunit contain the editing function and is a proofreading 3'-5' exonuclease	ko:K02342	RNase_T	-
contig_1036_np1212_380	L	rnhA	RNase H	ko:K03469	RNase_H	GO:0003674,GO:0003824,GO:0004518,GO:0004519,GO:0004521,GO:0004523,GO:0004540,GO:0006139,GO:0006259,GO:0006260,GO:0006261,GO:0006271,GO:0006273,GO:0006401,GO:0006725,GO:0006807,GO:0008150,GO:0008152,GO:0009056,GO:0009057,GO:0009058,GO:0009059,GO:0009987,GO:0016070,GO:0016787,GO:0016788,GO:0016891,GO:0016893,GO:0019439,GO:0022616,GO:0033567,GO:0034641,GO:0034645,GO:0034655,GO:0043137,GO:0043170,GO:…
contig_1036_np1212_388	L	fpg	Involved in base excision repair of DNA damaged by oxidation or by mutagenic agents. Acts as DNA glycosylase that recognizes and removes damaged bases. Has a preference for oxidized purines, such as 7,8-dihydro-8-oxoguanine (8-oxoG). Has AP (apurinic apyrimidinic) lyase activity and introduces nicks in the DNA strand. Cleaves the DNA backbone by beta-delta elimination to generate a single-strand …	ko:K10563	Fapy_DNA_glyco,H2TH,zf-FPG_IleRS	-
contig_1036_np1212_416	L	sbcD	SbcCD cleaves DNA hairpin structures. These structures can inhibit DNA replication and are intermediates in certain DNA recombination reactions. The complex acts as a 3'- 5' double strand exonuclease that can open hairpins. It also has a 5' single-strand endonuclease activity	ko:K03547	Metallophos,SbcD_C	-
contig_1036_np1212_417	L	sbcC	Putative exonuclease SbcCD, C subunit	ko:K03546	AAA_23,SbcCD_C	-
contig_1036_np1212_421	L	-	Transposase DDE domain group 1	-	DDE_Tnp_1_4	-
contig_1036_np1212_468	L	gyrA	A type II topoisomerase that negatively supercoils closed circular double-stranded (ds) DNA in an ATP-dependent manner to modulate DNA topology and maintain chromosomes in an underwound state. Negative supercoiling favors strand separation, and DNA replication, transcription, recombination and repair, all of which involve strand separation. Also able to catalyze the interconversion of other topol…	ko:K02469	DNA_gyraseA_C,DNA_topoisoIV	-
contig_1036_np1212_469	L	gyrA	A type II topoisomerase that negatively supercoils closed circular double-stranded (ds) DNA in an ATP-dependent manner to modulate DNA topology and maintain chromosomes in an underwound state. Negative supercoiling favors strand separation, and DNA replication, transcription, recombination and repair, all of which involve strand separation. Also able to catalyze the interconversion of other topol…	ko:K02469	DNA_gyraseA_C,DNA_topoisoIV	-
contig_1036_np1212_478	L	sbcB	Exonucleolytic cleavage in the 3'- to 5'-direction to yield nucleoside 5'-phosphates	ko:K01141	Exonuc_X-T_C,RNase_T	-
contig_1036_np1212_552	L	hupB	Histone-like DNA-binding protein which is capable of wrapping DNA to stabilize it, and thus to prevent its denaturation under extreme environmental conditions	ko:K03530	Bac_DNA_binding	-
contig_1036_np1212_562	L	hrpA	Involved in the post-transcriptional processing of the daa operon mRNA, which encodes proteins involved in fimbrial biogenesis of an enteropathogenic E. coli strain	ko:K03578	DEAD,DUF3418,HA2,Helicase_C,OB_NTP_bind	-
contig_1036_np1212_579	L	mfd	Couples transcription and DNA repair by recognizing RNA polymerase (RNAP) stalled at DNA lesions. Mediates ATP-dependent release of RNAP and its truncated transcript from the DNA, and recruitment of nucleotide excision repair machinery to the damaged site	ko:K03723	CarD_CdnL_TRCF,DEAD,Helicase_C,TRCF	-
contig_1036_np1212_583	L	nudC	NADH pyrophosphatase-like rudimentary NUDIX domain	ko:K03426	NUDIX,NUDIX-like,zf-NADH-PPase	-
contig_1036_np1212_711	L	-	Belongs to the UPF0102 family	ko:K07460	UPF0102	-
contig_1036_np1212_721	L	recC	A helicase nuclease that prepares dsDNA breaks (DSB) for recombinational DNA repair. Binds to DSBs and unwinds DNA via a highly rapid and processive ATP-dependent bidirectional helicase activity. Unwinds dsDNA until it encounters a Chi (crossover hotspot instigator) sequence from the 3' direction. Cuts ssDNA a few nucleotides 3' to the Chi site. The properties and activities of the enzyme are cha…	ko:K03583	Exonuc_V_gamma	-
contig_1036_np1212_722	L	recB	A helicase nuclease that prepares dsDNA breaks (DSB) for recombinational DNA repair. Binds to DSBs and unwinds DNA via a highly rapid and processive ATP-dependent bidirectional helicase activity. Unwinds dsDNA until it encounters a Chi (crossover hotspot instigator) sequence from the 3' direction. Cuts ssDNA a few nucleotides 3' to the Chi site. The properties and activities of the enzyme are cha…	ko:K03582	PDDEXK_1,UvrD-helicase,UvrD_C	-
contig_1036_np1212_723	L	recD	A helicase nuclease that prepares dsDNA breaks (DSB) for recombinational DNA repair. Binds to DSBs and unwinds DNA via a highly rapid and processive ATP-dependent bidirectional helicase activity. Unwinds dsDNA until it encounters a Chi (crossover hotspot instigator) sequence from the 3' direction. Cuts ssDNA a few nucleotides 3' to the Chi site. The properties and activities of the enzyme are cha…	ko:K03581	AAA_19,AAA_30,UvrD_C_2	-
contig_1036_np1212_755	L	recQ1	DNA helicase	ko:K03654	DEAD,HRDC,HTH_40,Helicase_C,RQC,RecQ_Zn_bind	-
contig_1036_np1212_777	L	paaD	phenylacetate-CoA oxygenase, PaaJ subunit	ko:K02612	FeS_assembly_P	GO:0006082,GO:0006725,GO:0006805,GO:0008150,GO:0008152,GO:0009056,GO:0009404,GO:0009407,GO:0009410,GO:0009636,GO:0009850,GO:0009852,GO:0009987,GO:0010124,GO:0010817,GO:0016054,GO:0019439,GO:0019748,GO:0019752,GO:0032787,GO:0042178,GO:0042221,GO:0042445,GO:0042447,GO:0042537,GO:0043436,GO:0044237,GO:0044248,GO:0044281,GO:0044282,GO:0046395,GO:0050896,GO:0051716,GO:0065007,GO:0065008,GO:0070887,GO:…
contig_1036_np1212_816	L	uvrB	damaged site, the DNA wraps around one UvrB monomer. DNA wrap is dependent on ATP binding by UvrB and probably causes local melting of the DNA helix, facilitating insertion of UvrB beta-hairpin between the DNA strands. Then UvrB probes one DNA strand for the presence of a lesion. If a lesion is found the UvrA subunits dissociate and the UvrB-DNA preincision complex is formed. This complex is subs…	ko:K03702	Helicase_C,ResIII,UVR,UvrB	-
contig_1036_np1212_826	L	ybaZ	methylated DNA-protein cysteine methyltransferase	ko:K07443	DNA_binding_1	GO:0003674,GO:0003676,GO:0003677,GO:0003684,GO:0005488,GO:0005515,GO:0019899,GO:0097159,GO:1901363
contig_1036_np1212_827	L	-	helicase superfamily c-terminal domain	ko:K19789	Helicase_C,ResIII	-
contig_1036_np1212_836	L	deaD	DEAD-box RNA helicase involved in various cellular processes at low temperature, including ribosome biogenesis, mRNA degradation and translation initiation	ko:K05592	DEAD,DbpA,Helicase_C	-
contig_1036_np1212_865	L	topA	Releases the supercoiling and torsional tension of DNA, which is introduced during the DNA replication and transcription, by transiently cleaving and rejoining one strand of the DNA duplex. Introduces a single-strand break via transesterification at a target site in duplex DNA. The scissile phosphodiester is attacked by the catalytic tyrosine of the enzyme, resulting in the formation of a DNA-(5'…	ko:K03168	Topo_Zn_Ribbon,Topoisom_bac,Toprim,zf-C4_Topoisom	-
contig_1036_np1212_872	L	rhlB	DEAD-box RNA helicase involved in RNA degradation. Has RNA-dependent ATPase activity and unwinds double-stranded RNA	ko:K03732	DEAD,Helicase_C	-
contig_1036_np1212_919	L	alkB	COG3145 Alkylated DNA repair protein	-	2OG-FeII_Oxy_2	-
contig_1036_np1212_927	L	-	COG3344 Retron-type reverse transcriptase	-	GIIM,RVT_1	-
contig_1036_np1212_928	L	-	COG3344 Retron-type reverse transcriptase	-	GIIM,RVT_1	-
contig_1036_np1212_931	L	-	Phage integrase, N-terminal SAM-like domain	ko:K04763	Phage_int_SAM_4,Phage_integrase	-
contig_1036_np1212_932	L	-	Helix-turn-helix domain	ko:K07483	HTH_Tnp_1	-
contig_1036_np1212_940	L	-	IS66 C-terminal element	-	DDE_Tnp_IS66,DDE_Tnp_IS66_C,LZ_Tnp_IS66	-
contig_1036_np1212_942	L	-	Transposase	-	-	-
contig_1036_np1212_967	L	-	pilus organization	-	-	-
contig_1036_np1212_1071	L	-	DNA polymerase III, delta subunit, C terminal	-	DNA_pol3_delta2,DNApol3-delta_C	-
contig_1036_np1212_1073	L	tatD	TatD family	ko:K03424	TatD_DNase	-
contig_1036_np1212_1095	L	-	Transposase	-	-	-
contig_1036_np1212_1096	L	-	IS66 Orf2 like protein	ko:K07484	TnpB_IS66	-
contig_1036_np1212_1097	L	-	IS66 C-terminal element	-	DDE_Tnp_IS66,DDE_Tnp_IS66_C,LZ_Tnp_IS66	-
contig_1036_np1212_1118	L	-	DNA polymerase	-	GIIM,RVT_1	-
contig_1036_np1212_1163	L	-	COG3547 Transposase and inactivated derivatives	-	DEDD_Tnp_IS110,Transposase_20	-
contig_1036_np1212_1164	L	-	COG1943 Transposase and inactivated derivatives	-	-	-
contig_1036_np1212_1169	L	-	COG1943 Transposase and inactivated derivatives	-	-	-
contig_1036_np1212_1170	L	-	Belongs to the 'phage' integrase family	-	Phage_int_SAM_1,Phage_integrase	-
contig_1036_np1212_1171	L	-	Transposase IS200 like	ko:K07491	Y1_Tnp	-
contig_1036_np1212_1172	L	-	Transposase IS200 like	ko:K07491	Y1_Tnp	-
contig_1036_np1212_1196	L	ung	Uracil DNA glycosylase superfamily	ko:K03648	UDG	GO:0003674,GO:0003824,GO:0004844,GO:0005575,GO:0005622,GO:0005623,GO:0005737,GO:0006139,GO:0006259,GO:0006281,GO:0006284,GO:0006285,GO:0006725,GO:0006807,GO:0006950,GO:0006974,GO:0008150,GO:0008152,GO:0009987,GO:0016787,GO:0016798,GO:0016799,GO:0019104,GO:0033554,GO:0034641,GO:0043170,GO:0044237,GO:0044238,GO:0044260,GO:0044424,GO:0044464,GO:0046483,GO:0050896,GO:0051716,GO:0071704,GO:0090304,GO:…
contig_1036_np1212_1265	L	-	may be used for the termination of replication of chromosome 2	-	Phage_integrase	-
contig_1036_np1212_1267	L	-	Integrase core domain	ko:K07497	HTH_32,rve,rve_3	-
contig_1036_np1212_1271	L	-	NUDIX domain	ko:K01515,ko:K03574	NUDIX	-
contig_1036_np1212_1301	L	-	COG0847 DNA polymerase III, epsilon subunit and related 3'-5' exonucleases	ko:K02342	GIY-YIG,RNase_T,VRR_NUC	-
contig_1036_np1212_1324	L	-	PFAM Transposase IS3 IS911	-	HTH_21,HTH_Tnp_1,rve	-
contig_1036_np1212_1325	L	-	PFAM Transposase IS3 IS911	-	HTH_Tnp_1	-
contig_1036_np1212_1330	L	-	Transposase IS200 like	-	-	-
contig_1036_np1212_1331	L	-	COG1943 Transposase and inactivated derivatives	-	-	-
contig_1036_np1212_1335	L	alkA	3-methyladenine DNA glycosylase 8-oxoguanine DNA glycosylase	ko:K01247	HhH-GPD	-
contig_1036_np1212_1380	L	-	Putative exonuclease SbcCD, C subunit	ko:K03546	AAA_23,SbcCD_C	-
contig_1036_np1212_1381	L	sbcD	SbcCD cleaves DNA hairpin structures. These structures can inhibit DNA replication and are intermediates in certain DNA recombination reactions. The complex acts as a 3'- 5' double strand exonuclease that can open hairpins. It also has a 5' single-strand endonuclease activity	ko:K03547	Metallophos,SbcD_C	-
contig_1036_np1212_1385	L	-	nuclease activity	-	DUF1016	-
contig_1036_np1212_1458	L	-	Belongs to the DEAD box helicase family	-	DEAD,Helicase_C	-
contig_1036_np1212_1505	L	ruvB	The RuvA-RuvB complex in the presence of ATP renatures cruciform structure in supercoiled DNA with palindromic sequence, indicating that it may promote strand exchange reactions in homologous recombination. RuvAB is a helicase that mediates the Holliday junction migration by localized denaturation and reannealing	ko:K03551	RuvB_C,RuvB_N	-
contig_1036_np1212_1506	L	ruvA	The RuvA-RuvB complex in the presence of ATP renatures cruciform structure in supercoiled DNA with palindromic sequence, indicating that it may promote strand exchange reactions in homologous recombination. RuvAB is a helicase that mediates the Holliday junction migration by localized denaturation and reannealing. RuvA stimulates, in the presence of DNA, the weak ATPase activity of RuvB	ko:K03550	HHH_5,RuvA_C,RuvA_N	-
contig_1036_np1212_1550	L	topB	Releases the supercoiling and torsional tension of DNA, which is introduced during the DNA replication and transcription, by transiently cleaving and rejoining one strand of the DNA duplex. Introduces a single-strand break via transesterification at a target site in duplex DNA. The scissile phosphodiester is attacked by the catalytic tyrosine of the enzyme, resulting in the formation of a DNA-(5'…	ko:K03169	Topoisom_bac,Toprim	-
contig_1036_np1212_1571	L	-	helicase superfamily c-terminal domain	-	DEAD,Helicase_C	-
contig_1036_np1212_1605	L	helD	DNA topoisomerase, type IA, zn finger domain protein	ko:K03658	Helicase_IV_N,UvrD-helicase,UvrD_C,zf-C4_Topoisom	-
contig_1036_np1212_1611	L	-	PFAM NERD domain protein	-	NERD	-
contig_1036_np1212_1621	L	-	Helix-turn-helix domain of transposase family ISL3	-	DDE_Tnp_ISL3,HTH_Tnp_ISL3	-
contig_1036_np1212_1622	L	-	Helix-turn-helix domain of transposase family ISL3	-	DDE_Tnp_ISL3,HTH_Tnp_ISL3	-
contig_1036_np1212_1660	L	uvrC	The UvrABC repair system catalyzes the recognition and processing of DNA lesions. UvrC both incises the 5' and 3' sides of the lesion. The N-terminal half is responsible for the 3' incision and the C-terminal half is responsible for the 5' incision	ko:K03703	GIY-YIG,HHH,HHH_2,HHH_5,UVR,UvrC_HhH_N	-
contig_1036_np1212_1661	L	uvrC	The UvrABC repair system catalyzes the recognition and processing of DNA lesions. UvrC both incises the 5' and 3' sides of the lesion. The N-terminal half is responsible for the 3' incision and the C-terminal half is responsible for the 5' incision	ko:K03703	GIY-YIG,HHH,HHH_2,HHH_5,UVR,UvrC_HhH_N	GO:0003674,GO:0003824,GO:0004518,GO:0004519,GO:0004520,GO:0004536,GO:0005575,GO:0005622,GO:0005623,GO:0005737,GO:0006139,GO:0006259,GO:0006281,GO:0006725,GO:0006807,GO:0006950,GO:0006974,GO:0008150,GO:0008152,GO:0009314,GO:0009380,GO:0009381,GO:0009628,GO:0009987,GO:0016787,GO:0016788,GO:0032991,GO:0033554,GO:0034641,GO:0043170,GO:0044237,GO:0044238,GO:0044260,GO:0044424,GO:0044464,GO:0046483,GO:…
contig_1036_np1212_1668	L	xthA	exodeoxyribonuclease III	ko:K01142	Exo_endo_phos	-
contig_1036_np1212_1710	L	-	Transposase DDE domain group 1	-	DDE_Tnp_1_4	-
contig_1036_np1212_1729	L	dinB	Poorly processive, error-prone DNA polymerase involved in untargeted mutagenesis. Copies undamaged DNA at stalled replication forks, which arise in vivo from mismatched or misaligned primer ends. These misaligned primers can be extended by PolIV. Exhibits no 3'-5' exonuclease (proofreading) activity. May be involved in translesional synthesis, in conjunction with the beta clamp from PolIII	ko:K02346	IMS,IMS_C,IMS_HHH	-
contig_1036_np1212_1776	L	dhaA	Alpha beta hydrolase	ko:K01563,ko:K22318	Abhydrolase_1	-
contig_1036_np1212_1819	L	recO	Involved in DNA repair and RecF pathway recombination	ko:K03584	RecO_C,RecO_N	-
contig_1036_np1212_1839	L	-	COG3344 Retron-type reverse transcriptase	-	GIIM,RVT_1	-
contig_1036_np1212_1840	L	-	RelB antitoxin	ko:K07473	RelB	-
contig_1036_np1212_1845	L	-	PFAM RNA-directed DNA polymerase (Reverse transcriptase)	-	GIIM,RVT_1	-
contig_1036_np1212_1860	L	-	Transposase IS200 like	-	-	-
contig_1036_np1212_1863	L	-	COG3344 Retron-type reverse transcriptase	-	GIIM,RVT_1	-
contig_1036_np1212_1865	L	-	Retron-type reverse transcriptase	-	GIIM,RVT_1	-
contig_1036_np1212_1869	L	-	Retron-type reverse transcriptase	-	GIIM,RVT_1	-
contig_1036_np1212_1872	L	-	COG3344 Retron-type reverse transcriptase	-	GIIM,RVT_1	-
contig_1036_np1212_1887	L	intIA	Phage integrase family	-	Phage_int_SAM_4,Phage_integrase	-
contig_1036_np1212_1911	L	recR	May play a role in DNA repair. It seems to be involved in an RecBC-independent recombinational process of DNA repair. It may act with RecF and RecO	ko:K06187	RecR,Toprim_4	-
contig_1036_np1212_1913	L	dnaX	DNA polymerase III is a complex, multichain enzyme responsible for most of the replicative synthesis in bacteria. This DNA polymerase also exhibits 3' to 5' exonuclease activity	ko:K02343	DNA_pol3_delta2,DNA_pol3_gamma3,DNA_pol3_tau_5	-
contig_1036_np1212_1944	L	-	COG0084 Mg-dependent DNase	ko:K03424	TatD_DNase	-
contig_1036_np1212_2056	L	-	Transposase IS200 like	-	-	-
contig_1036_np1212_2057	L	-	COG1943 Transposase and inactivated derivatives	-	-	-
contig_1036_np1212_2059	L	-	COG1943 Transposase and inactivated derivatives	-	-	-
contig_1036_np1212_2078	L	-	AAA domain	ko:K06919	AAA_25,Prim_Zn_Ribbon,Toprim_3	-
contig_1036_np1212_2117	L	-	COG3547 Transposase and inactivated derivatives	-	DEDD_Tnp_IS110,Transposase_20	-
contig_1036_np1212_2127	L	umuC	COG0389 Nucleotidyltransferase DNA polymerase involved in DNA repair	ko:K03502	DUF4113,IMS,IMS_C,IMS_HHH	-
contig_1036_np1212_2141	L	yhbQ	endonuclease containing a URI domain	ko:K07461	GIY-YIG	GO:0003674,GO:0003824,GO:0004518,GO:0004519,GO:0004520,GO:0004527,GO:0004529,GO:0004536,GO:0006139,GO:0006259,GO:0006725,GO:0006807,GO:0008150,GO:0008152,GO:0008296,GO:0008408,GO:0009987,GO:0016787,GO:0016788,GO:0016796,GO:0016895,GO:0034641,GO:0043170,GO:0044237,GO:0044238,GO:0044260,GO:0046483,GO:0071704,GO:0090304,GO:0090305,GO:0140097,GO:1901360
contig_1036_np1212_2203	L	ligA	DNA ligase that catalyzes the formation of phosphodiester linkages between 5'-phosphoryl and 3'-hydroxyl groups in double-stranded DNA using NAD as a coenzyme and as the energy source for the reaction. It is essential for DNA replication and repair of damaged DNA	ko:K01972	BRCT,DNA_ligase_OB,DNA_ligase_ZBD,DNA_ligase_aden,HHH_2,HHH_5	-
contig_1036_np1212_2218	L	ycaJ	ATPase related to the helicase subunit of the Holliday junction resolvase	ko:K07478	AAA,AAA_assoc_2,MgsA_C,RuvB_N	-
contig_1036_np1212_2249	L	-	PFAM Transposase IS3 IS911	-	HTH_Tnp_1	-
contig_1036_np1212_2250	L	-	PFAM Transposase IS3 IS911	-	HTH_21,HTH_Tnp_1,rve	-
contig_1036_np1212_2261	L	-	DNA polymerase III subunit chi	ko:K02339	DNA_pol3_chi	-
contig_1036_np1212_2281	L	dnaB	it exhibits DNA-dependent ATPase activity and contains distinct active sites for ATP binding, DNA binding, and interaction with DnaC protein, primase, and other prepriming proteins	ko:K02314	DnaB,DnaB_C	-
contig_1036_np1212_2294	L	mutS	that it carries out the mismatch recognition step. This protein has a weak ATPase activity	ko:K03555	MutS_I,MutS_II,MutS_III,MutS_IV,MutS_V	-
contig_1036_np1212_2425	L	-	3-methyladenine DNA glycosylase	-	Adenine_glyco	-
contig_1036_np1212_2431	L	ruvC	Nuclease that resolves Holliday junction intermediates in genetic recombination. Cleaves the cruciform structure in supercoiled DNA by nicking to strands with the same polarity at sites symmetrically opposed at the junction in the homologous arms and leaves a 5'-terminal phosphate and a 3'-terminal hydroxyl group	ko:K01159	RuvC	-
contig_1036_np1212_2457	L	rdgC	May be involved in recombination	ko:K03554	RdgC	-
contig_1036_np1212_2505	L	mutL	This protein is involved in the repair of mismatches in DNA. It is required for dam-dependent methyl-directed DNA mismatch repair. May act as a molecular matchmaker , a protein that promotes the formation of a stable complex between two or more DNA-binding proteins in an ATP-dependent manner without itself being part of a final effector complex	ko:K03572	DNA_mis_repair,HATPase_c_3,MutL_C	-
contig_1036_np1212_2509	L	orn	3'-to-5' exoribonuclease specific for small oligoribonucleotides	ko:K13288	RNase_T	-
contig_1036_np1212_2524	L	xseA	Bidirectionally degrades single-stranded DNA into large acid-insoluble oligonucleotides, which are then degraded further into small acid-soluble oligonucleotides	ko:K03601	Exonuc_VII_L,tRNA_anti_2	-
contig_1036_np1212_2582	L	recA	Can catalyze the hydrolysis of ATP in the presence of single-stranded DNA, the ATP-dependent uptake of single-stranded DNA by duplex DNA, and the ATP-dependent hybridization of homologous single-stranded DNAs. It interacts with LexA causing its activation and leading to its autocatalytic cleavage	ko:K03553	RecA	-
contig_1036_np1212_2677	L	dnaE	DNA polymerase	ko:K02337	DNA_pol3_alpha,HHH_6,PHP,tRNA_anti-codon	-
contig_1036_np1212_2678	L	rnhB	Endonuclease that specifically degrades the RNA of RNA- DNA hybrids	ko:K03470	RNase_HII	-
contig_1036_np1212_2710	L	-	PFAM Transposase IS66 family	-	DDE_Tnp_IS66,DDE_Tnp_IS66_C,LZ_Tnp_IS66	-
contig_1036_np1212_2713	L	-	PFAM Transposase IS3 IS911	-	HTH_21,HTH_Tnp_1,rve	-
contig_1036_np1212_2714	L	-	PFAM Transposase IS3 IS911	-	HTH_Tnp_1	-
contig_1036_np1212_2721	L	-	transposase activity	-	DDE_Tnp_1,Nterm_IS4	-
contig_1036_np1212_2722	L	-	transposase activity	-	DDE_Tnp_1,Nterm_IS4	-
contig_1036_np1212_2725	L	-	transposase activity	-	DDE_Tnp_1,Nterm_IS4	-
contig_1036_np1212_2749	L	holA	DNA polymerase III	ko:K02340	DNA_pol3_delt_C,DNA_pol3_delta,DNA_pol3_gamma3	-
contig_1036_np1212_2807	L	ssb	Plays an important role in DNA replication, recombination and repair. Binds to ssDNA and to an array of partner proteins to recruit them to their sites of action during DNA metabolism	ko:K03111	SSB	-
contig_1036_np1212_2808	L	uvrA	The UvrABC repair system catalyzes the recognition and processing of DNA lesions. UvrA is an ATPase and a DNA-binding protein. A damage recognition complex composed of 2 UvrA and 2 UvrB subunits scans DNA for abnormalities. When the presence of a lesion has been verified by UvrB, the UvrA molecules dissociate	ko:K03701	ABC_tran	-
contig_1036_np1212_2874	L	parC	Topoisomerase IV is essential for chromosome segregation. It relaxes supercoiled DNA. Performs the decatenation events required during the replication of a circular DNA molecule	ko:K02621	DNA_gyraseA_C,DNA_topoisoIV	-
contig_1036_np1212_2875	L	parE	Topoisomerase IV is essential for chromosome segregation. It relaxes supercoiled DNA. Performs the decatenation events required during the replication of a circular DNA molecule	ko:K02622	DNA_gyraseB,DNA_gyraseB_C,HATPase_c,Toprim	-
contig_1036_np1212_2879	L	nudF	COG0494 NTP pyrophosphohydrolases including oxidative damage repair enzymes	ko:K01515	NUDIX	-
contig_1036_np1212_2881	L	recJ	exonuclease recJ	ko:K07462	DHH,DHHA1	-
contig_1036_np1212_2912	L	mutY	glycosylase	ko:K03575	EndIII_4Fe-2S,HhH-GPD,NUDIX_4	-
contig_1036_np1212_2925	L	ogt	Involved in the cellular defense against the biological effects of O6-methylguanine (O6-MeG) and O4-methylthymine (O4-MeT) in DNA. Repairs the methylated nucleobase in DNA by stoichiometrically transferring the methyl group to a cysteine residue in the enzyme. This is a suicide reaction the enzyme is irreversibly inactivated	ko:K00567	DNA_binding_1,Methyltransf_1N	-
contig_1036_np1212_2930	L	hrpB	ATP-dependent helicase HrpB	ko:K03579	DEAD,Flavi_DEAD,HA2,Helicase_C,HrpB_C	-
contig_1036_np1212_2936	L	xseB	Bidirectionally degrades single-stranded DNA into large acid-insoluble oligonucleotides, which are then degraded further into small acid-soluble oligonucleotides	ko:K03602	Exonuc_VII_S	-
contig_1036_np1212_2977	L	-	DDE_Tnp_1-associated	-	DDE_Tnp_1,DDE_Tnp_1_assoc	-
contig_1036_np1212_2978	L	-	Transposase IS200 like	-	-	-
contig_1036_np1212_2979	L	-	Transposase IS200 like	-	-	-
contig_1036_np1212_2984	L	-	TatD related DNase	ko:K03424	TatD_DNase	-
contig_1036_np1212_2985	L	yjjV	Deoxyribonuclease	ko:K03424	TatD_DNase	-
contig_1036_np1212_2986	L	-	Transposase DDE domain group 1	-	DDE_Tnp_1_4	-
contig_1036_np1212_2997	L	-	TatD related DNase	ko:K03424	TatD_DNase	-
contig_1036_np1212_3038	L	-	COG0494 NTP pyrophosphohydrolases including oxidative damage repair enzymes	-	NUDIX	-
contig_1036_np1212_3045	L	recN	May be involved in recombinational repair of damaged DNA	ko:K03631	SMC_N	-
contig_1036_np1212_3068	L	nudH	Accelerates the degradation of transcripts by removing pyrophosphate from the 5'-end of triphosphorylated RNA, leading to a more labile monophosphorylated state that can stimulate subsequent ribonuclease cleavage	ko:K08311	NUDIX	-
contig_1036_np1212_3103	L	-	exodeoxyribonuclease III	ko:K01142	Exo_endo_phos	-
contig_1036_np1212_3106	L	-	Arm DNA-binding domain	-	Arm-DNA-bind_3,Phage_int_SAM_3,Phage_integrase	-
contig_1036_np1212_3110	L	-	PFAM Transposase IS3 IS911	-	HTH_Tnp_1	-
contig_1036_np1212_3111	L	-	PFAM Transposase IS3 IS911	-	HTH_Tnp_1	-
contig_1036_np1212_3112	L	-	PFAM Transposase IS3 IS911	-	HTH_21,HTH_Tnp_1,rve	-
contig_1036_np1212_3113	L	-	PFAM Transposase IS3 IS911	-	HTH_21,HTH_Tnp_1,rve	-
contig_1036_np1212_3120	L	-	PFAM Helicase conserved C-terminal domain	-	DUF3883,Helicase_C,ResIII,SNF2_N	-
contig_1036_np1212_3121	L	-	DNA methylAse	-	N6_N4_Mtase	-
contig_1036_np1212_3125	L	-	Psort location Cytoplasmic, score 8.96	-	Viral_helicase1	-
contig_1036_np1212_3127	L	-	Transcription regulator that activates transcription by stimulating RNA polymerase (RNAP) recycling in case of stress conditions such as supercoiled DNA or high salt concentrations. Probably acts by releasing the RNAP, when it is trapped or immobilized on tightly supercoiled DNA. Does not activate transcription on linear DNA. Probably not involved in DNA repair	-	Helicase_C	-
contig_1036_np1212_3180	L	nth	DNA repair enzyme that has both DNA N-glycosylase activity and AP-lyase activity. The DNA N-glycosylase activity releases various damaged pyrimidines from DNA by cleaving the N- glycosidic bond, leaving an AP (apurinic apyrimidinic) site. The AP-lyase activity cleaves the phosphodiester bond 3' to the AP site by a beta-elimination, leaving a 3'-terminal unsaturated sugar and a product with a term…	ko:K10773	HhH-GPD	-
contig_1036_np1212_3269	L	-	Retron-type reverse transcriptase	-	GIIM,RVT_1	-
contig_1036_np1212_3270	L	-	COG3344 Retron-type reverse transcriptase	-	GIIM,RVT_1	-
contig_1036_np1212_3274	L	-	Transposase IS200 like	-	-	-
contig_1036_np1212_3307	L	-	COG2818 3-methyladenine DNA glycosylase	ko:K01246	Adenine_glyco	-
contig_1036_np1212_3319	L	-	Transposase DDE domain group 1	-	DDE_Tnp_1_4	-
contig_1036_np1212_3332	L	rsmD	Specifically methylates the guanine in position 966 of 16S rRNA in the assembled 30S particle	ko:K08316	Cons_hypoth95	GO:0000154,GO:0001510,GO:0003674,GO:0003824,GO:0006139,GO:0006364,GO:0006396,GO:0006725,GO:0006807,GO:0008150,GO:0008152,GO:0008168,GO:0008170,GO:0008173,GO:0008649,GO:0008757,GO:0008990,GO:0009451,GO:0009987,GO:0010467,GO:0016070,GO:0016072,GO:0016435,GO:0016740,GO:0016741,GO:0022613,GO:0031167,GO:0032259,GO:0034470,GO:0034641,GO:0034660,GO:0042254,GO:0043170,GO:0043412,GO:0043414,GO:0044085,GO:…
contig_1036_np1212_3333	L	-	EXOIII	ko:K02342	RNase_T	-
contig_1036_np1212_3345	L	tag	DNA-3-methyladenine glycosylase	ko:K01246	Adenine_glyco	-
contig_1036_np1212_3360	L	recG	Critical role in recombination and DNA repair. Helps process Holliday junction intermediates to mature products by catalyzing branch migration. Has a DNA unwinding activity characteristic of a DNA helicase with a 3'- to 5'- polarity. Unwinds branched duplex DNA (Y-DNA)	ko:K03655	DEAD,Helicase_C,RecG_wedge	-
contig_1036_np1212_3419	L	-	PFAM Integrase catalytic region	-	HTH_23,HTH_24,rve	-
contig_1036_np1212_3420	L	-	Transposase and inactivated derivatives	-	rve	-
contig_1036_np1212_3421	L	-	IstB-like ATP binding protein	-	IstB_IS21,IstB_IS21_ATP	-
contig_1036_np1212_3423	L	-	Retron-type reverse transcriptase	-	GIIM,RVT_1	-
contig_1036_np1212_3431	L	-	Helix-turn-helix domain of transposase family ISL3	-	DDE_Tnp_ISL3,HTH_Tnp_ISL3	-
contig_1036_np1212_3478	L	dnaA	it binds specifically double-stranded DNA at a 9 bp consensus (dnaA box) 5'-TTATC CA A CA A-3'. DnaA binds to ATP and to acidic phospholipids	ko:K02313	Bac_DnaA,Bac_DnaA_C,DnaA_N	-
contig_1036_np1212_3479	L	dnaN	Confers DNA tethering and processivity to DNA polymerases and other proteins. Acts as a clamp, forming a ring around DNA (a reaction catalyzed by the clamp-loading complex) which diffuses in an ATP-independent manner freely and bidirectionally along dsDNA. Initially characterized for its ability to contact the catalytic subunit of DNA polymerase III (Pol III), a complex, multichain enzyme respons…	ko:K02338	DNA_pol3_beta,DNA_pol3_beta_2,DNA_pol3_beta_3	-
contig_1036_np1212_3480	L	recF	it is required for DNA replication and normal SOS inducibility. RecF binds preferentially to single-stranded, linear DNA. It also seems to bind ATP	ko:K03629	SMC_N	-
contig_1036_np1212_3481	L	gyrB	A type II topoisomerase that negatively supercoils closed circular double-stranded (ds) DNA in an ATP-dependent manner to modulate DNA topology and maintain chromosomes in an underwound state. Negative supercoiling favors strand separation, and DNA replication, transcription, recombination and repair, all of which involve strand separation. Also able to catalyze the interconversion of other topol…	ko:K02470	DNA_gyraseB,DNA_gyraseB_C,HATPase_c,Toprim	-
contig_1036_np1212_3534	L	uvrD	Unwinds DNA duplexes with 3' to 5' polarity with respect to the bound strand and initiates unwinding most effectively when a single-stranded region is present	ko:K03657	UvrD-helicase,UvrD_C	-
contig_1036_np1212_3535	L	uvrD	Unwinds DNA duplexes with 3' to 5' polarity with respect to the bound strand and initiates unwinding most effectively when a single-stranded region is present	ko:K03657	UvrD-helicase,UvrD_C	-
contig_1036_np1212_3537	L	polA	In addition to polymerase activity, this DNA polymerase exhibits 5'-3' exonuclease activity	ko:K02335	5_3_exonuc,5_3_exonuc_N,DNA_pol_A,DNA_pol_A_exo1	-
contig_1036_np1212_3582	L	-	COG1943 Transposase and inactivated derivatives	-	-	-
contig_1036_np1212_3583	L	-	Transposase IS200 like	-	-	-
contig_1036_np1212_3636	L	-	Helix-turn-helix domain of transposase family ISL3	-	DDE_Tnp_ISL3,HTH_Tnp_ISL3	-
contig_1036_np1212_3639	L	-	DDE_Tnp_1-associated	-	DDE_Tnp_1,DDE_Tnp_1_assoc	-
contig_1036_np1212_3691	L	-	Transposase DDE domain group 1	-	DDE_Tnp_1_4	-
contig_1036_np1212_3694	L	-	COG3436 Transposase and inactivated derivatives	ko:K07484	DDE_Tnp_IS66,DDE_Tnp_IS66_C,LZ_Tnp_IS66	-
contig_1036_np1212_3695	L	-	Domain of unknown function (DUF4372)	-	DDE_Tnp_1,DUF4372	-
contig_1036_np1212_3696	L	-	Domain of unknown function (DUF4372)	-	DDE_Tnp_1,DUF4372	-
contig_1036_np1212_3697	L	-	Helix-turn-helix domain of transposase family ISL3	-	DDE_Tnp_ISL3,HTH_Tnp_ISL3	-
contig_1036_np1212_3698	L	-	Helix-turn-helix domain of transposase family ISL3	-	DDE_Tnp_ISL3,HTH_Tnp_ISL3	-
contig_1036_np1212_3787	L	-	Histidine kinase-, DNA gyrase B-, and HSP90-like ATPase	-	HATPase_c_3	-
contig_1036_np1212_3791	L	-	Phage integrase family	-	Phage_integrase	-
contig_1036_np1212_3830	L	-	Domain of unknown function (DUF3127)	-	DUF3127	-
contig_1036_np1212_3912	L	-	Transposase DDE domain group 1	-	DDE_Tnp_1_4	-
contig_1036_np1212_3994	L	-	COG1943 Transposase and inactivated derivatives	-	-	-
contig_1036_np1212_3995	L	-	COG1943 Transposase and inactivated derivatives	-	-	-
contig_1036_np1212_3996	L	-	COG1943 Transposase and inactivated derivatives	-	-	-
contig_1036_np1212_3998	L	-	Transposase DDE domain group 1	-	DDE_Tnp_1_4	-
contig_1036_np1212_4005	L	-	Transposase	ko:K07481	DDE_Tnp_1,DUF772	-
contig_1036_np1212_4135	L	-	Extracellular nuclease	ko:K07004	DUF3616,Endonuclease_1,Exo_endo_phos,LTD	-
contig_1036_np1212_3124	LO	-	Belongs to the peptidase S16 family	-	-	-
contig_1036_np1212_3374	LU	dprA	Rossmann fold nucleotide-binding protein involved in DNA uptake	ko:K04096	DNA_processg_A	-
contig_1036_np1212_13	M	slyB	Glycine zipper 2TM domain	ko:K06077	Rick_17kDa_Anti	GO:0005575,GO:0005623,GO:0009279,GO:0016020,GO:0019867,GO:0030312,GO:0030313,GO:0031975,GO:0044462,GO:0044464,GO:0071944
contig_1036_np1212_31	M	-	TIGRFAM TonB	ko:K03832	TonB_C	-
contig_1036_np1212_80	M	-	COG0791 Cell wall-associated hydrolases (invasion-associated proteins)	ko:K13694,ko:K13695	NLPC_P60	-
contig_1036_np1212_218	M	-	phage-related protein rsc1931 or rs03500 SWALL Q8XY32 (EMBL AL646067) (268 aa) fasta scores E()	-	Muraidase,PG_binding_1	-
contig_1036_np1212_245	M	surA	Chaperone involved in the correct folding and assembly of outer membrane proteins. Recognizes specific patterns of aromatic residues and the orientation of their side chains, which are found more frequently in integral outer membrane proteins. May act in both early periplasmic and late outer membrane-associated steps of protein maturation	ko:K03771	Rotamase,Rotamase_3,SurA_N	GO:0000413,GO:0003674,GO:0003755,GO:0003824,GO:0005488,GO:0005515,GO:0005575,GO:0005623,GO:0006457,GO:0006458,GO:0006464,GO:0006807,GO:0008150,GO:0008152,GO:0009987,GO:0016043,GO:0016853,GO:0016859,GO:0018193,GO:0018208,GO:0019538,GO:0022607,GO:0030288,GO:0030313,GO:0031647,GO:0031975,GO:0033218,GO:0036211,GO:0042277,GO:0042597,GO:0043163,GO:0043165,GO:0043170,GO:0043412,GO:0044085,GO:0044091,GO:…
contig_1036_np1212_246	M	lptD	Together with LptE, is involved in the assembly of lipopolysaccharide (LPS) at the surface of the outer membrane	ko:K04744	OstA,OstA_C	-
contig_1036_np1212_252	M	-	Peptidase M23	ko:K19304	OapA,Peptidase_M23	-
contig_1036_np1212_285	M	-	Belongs to the ompA family	ko:K21218	OmpA	-
contig_1036_np1212_289	M	-	secretion protein	ko:K12542	Biotin_lipoyl_2,HlyD,HlyD_3	-
contig_1036_np1212_325	M	-	protein involved in formation of curli polymers	-	CsgG	-
contig_1036_np1212_383	M	mltD	COG0741 Soluble lytic murein transglycosylase and related regulatory proteins (some contain LysM invasin domains)	ko:K08307	LysM,SLT	-
contig_1036_np1212_399	M	-	PPIases accelerate the folding of proteins. It catalyzes the cis-trans isomerization of proline imidic peptide bonds in oligopeptides	ko:K03768	Pro_isomerase	-
contig_1036_np1212_498	M	prc	Belongs to the peptidase S41A family	ko:K03797	DUF3340,PDZ,Peptidase_S41	-
contig_1036_np1212_555	M	-	mechanosensitive ion channel	ko:K03442	MS_channel,TM_helix	-
contig_1036_np1212_559	M	-	peptidase	-	Peptidase_M23	-
contig_1036_np1212_560	M	-	Polymer-forming cytoskeletal	-	Bactofilin	-
contig_1036_np1212_563	M	-	PFAM porin Gram-negative type	-	Porin_4	-
contig_1036_np1212_564	M	vacJ	Surface lipoprotein	ko:K04754	MlaA	-
contig_1036_np1212_617	M	-	protein conserved in bacteria	ko:K11904	Phage_GPD	-
contig_1036_np1212_623	M	-	transmembrane transport	-	MS_channel,cNMP_binding	-
contig_1036_np1212_624	M	exoY	Anthrax toxin LF subunit	ko:K16637	Anthrax_toxA	-
contig_1036_np1212_655	M	-	UDP-glucose 4-epimerase	ko:K01784	GDP_Man_Dehyd	-
contig_1036_np1212_657	M	-	O-Antigen ligase	-	Wzy_C	-
contig_1036_np1212_659	M	wcaJ	COG2148 Sugar transferases involved in lipopolysaccharide synthesis	ko:K03606,ko:K21303	Bac_transf,CoA_binding_3	-
contig_1036_np1212_660	M	galU	Nucleotidyl transferase	ko:K00963	NTP_transferase	-
contig_1036_np1212_661	M	galU	Nucleotidyl transferase	ko:K00963	NTP_transferase	-
contig_1036_np1212_663	M	-	Belongs to the UDP-glucose GDP-mannose dehydrogenase family	-	UDPG_MGDP_dh,UDPG_MGDP_dh_C,UDPG_MGDP_dh_N	-
contig_1036_np1212_667	M	-	Glycosyl transferases group 1	-	Glyco_trans_1_4,Glyco_transf_4,Glycos_transf_1	-
contig_1036_np1212_670	M	-	Belongs to the glycosyltransferase 26 family	ko:K05946	Glyco_tran_WecB	-
contig_1036_np1212_674	M	-	Belongs to the glycosyltransferase 26 family	ko:K05946	Glyco_tran_WecB	-
contig_1036_np1212_679	M	cpsB	Belongs to the mannose-6-phosphate isomerase type 2 family	ko:K00971,ko:K16011	MannoseP_isomer,NTP_transferase	-
contig_1036_np1212_680	M	-	23S rRNA-intervening sequence protein	-	23S_rRNA_IVP	-
contig_1036_np1212_697	M	-	Polysaccharide biosynthesis/export protein	ko:K20988	Poly_export,SLBB	-
contig_1036_np1212_727	M	-	Mechanosensitive ion channel protein	ko:K22044	MS_channel	-
contig_1036_np1212_792	M	mucD	Belongs to the peptidase S1C family	ko:K04771	PDZ_2,Trypsin_2	GO:0003674,GO:0003824,GO:0004175,GO:0004252,GO:0005575,GO:0005623,GO:0006508,GO:0006807,GO:0008150,GO:0008152,GO:0008233,GO:0008236,GO:0016787,GO:0017171,GO:0019538,GO:0030288,GO:0030313,GO:0031975,GO:0042597,GO:0043170,GO:0044238,GO:0044464,GO:0070011,GO:0071704,GO:0140096,GO:1901564
contig_1036_np1212_813	M	oprF	Belongs to the ompA family	ko:K03286	OMP_b-brl,OmpA,TSP_3	-
contig_1036_np1212_852	M	ycjG	Mandelate racemase / muconate lactonizing enzyme, C-terminal domain	ko:K01856,ko:K19802	MR_MLE_C,MR_MLE_N	GO:0003674,GO:0003824,GO:0016853,GO:0016854,GO:0016855
contig_1036_np1212_914	M	ybiO	mechanosensitive ion channel	ko:K22044	MS_channel	GO:0005575,GO:0005623,GO:0005886,GO:0016020,GO:0044464,GO:0071944
contig_1036_np1212_943	M	dgkA	Recycling of diacylglycerol produced during the turnover of membrane phospholipid	ko:K00901	DAGK_prokar	GO:0003674,GO:0003824,GO:0004143,GO:0005575,GO:0005623,GO:0005886,GO:0006629,GO:0006644,GO:0006650,GO:0006654,GO:0006793,GO:0006796,GO:0008150,GO:0008152,GO:0008610,GO:0008654,GO:0009058,GO:0009314,GO:0009411,GO:0009416,GO:0009628,GO:0009987,GO:0016020,GO:0016301,GO:0016310,GO:0016740,GO:0016772,GO:0016773,GO:0019637,GO:0044237,GO:0044238,GO:0044249,GO:0044255,GO:0044464,GO:0045017,GO:0046473,GO:…
contig_1036_np1212_987	M	mreC	Involved in formation and maintenance of cell shape	ko:K03570	MreC	-
contig_1036_np1212_988	M	mreD	Involved in formation of the rod shape of the cell. May also contribute to regulation of formation of penicillin-binding proteins	ko:K03571	MreD	-
contig_1036_np1212_1006	M	kpsF	Arabinose 5-phosphate isomerase	ko:K06041	CBS,SIS	-
contig_1036_np1212_1014	M	murA	Cell wall formation. Adds enolpyruvyl to UDP-N- acetylglucosamine	ko:K00790	EPSP_synthase	-
contig_1036_np1212_1015	M	murA	Belongs to the EPSP synthase family. MurA subfamily	ko:K00790	EPSP_synthase	GO:0000270,GO:0003674,GO:0003824,GO:0005575,GO:0005622,GO:0005623,GO:0005737,GO:0005829,GO:0006022,GO:0006023,GO:0006024,GO:0006807,GO:0008150,GO:0008152,GO:0008760,GO:0009058,GO:0009059,GO:0009252,GO:0009273,GO:0009987,GO:0016740,GO:0016765,GO:0030203,GO:0034645,GO:0042546,GO:0043170,GO:0044036,GO:0044038,GO:0044085,GO:0044237,GO:0044249,GO:0044260,GO:0044424,GO:0044444,GO:0044464,GO:0070589,GO:…
contig_1036_np1212_1094	M	-	Conserved TM helix	-	MS_channel,TM_helix	-
contig_1036_np1212_1138	M	-	Peptidase family M23	-	Peptidase_M23	-
contig_1036_np1212_1221	M	-	MltA specific insert domain	ko:K08304	3D,MltA	-
contig_1036_np1212_1243	M	-	Outer membrane lipoprotein-sorting protein	-	LolA_like	-
contig_1036_np1212_1303	M	-	NlpC/P60 family	-	NLPC_P60,SH3_3	-
contig_1036_np1212_1413	M	-	Transglycosylase SLT domain	-	SLT	-
contig_1036_np1212_1461	M	-	Mur ligase middle domain	-	Mur_ligase_C,Mur_ligase_M	-
contig_1036_np1212_1499	M	pal	OmpA family	ko:K03640	OmpA	GO:0005575,GO:0005623,GO:0008150,GO:0009279,GO:0009987,GO:0016020,GO:0019867,GO:0030312,GO:0030313,GO:0031224,GO:0031230,GO:0031241,GO:0031246,GO:0031975,GO:0032153,GO:0044425,GO:0044462,GO:0044464,GO:0051301,GO:0071944,GO:0098552
contig_1036_np1212_1501	M	tolA	TonB C terminal	ko:K03646	TonB_2	-
contig_1036_np1212_1521	M	murB	cell wall formation	ko:K00075	FAD_binding_4,MurB_C	-
contig_1036_np1212_1551	M	-	D-Ala-D-Ala carboxypeptidase	ko:K07259	Peptidase_S13	-
contig_1036_np1212_1584	M	-	Mandelate racemase / muconate lactonizing enzyme, C-terminal domain	ko:K19802	MR_MLE_C,MR_MLE_N	-
contig_1036_np1212_1762	M	-	mechanosensitive ion channel	ko:K16052	MS_channel	-
contig_1036_np1212_1765	M	kdsB	Activates KDO (a required 8-carbon sugar) for incorporation into bacterial lipopolysaccharide in Gram-negative bacteria	ko:K00979	CTP_transf_3	-
contig_1036_np1212_1767	M	lpxK	Transfers the gamma-phosphate of ATP to the 4'-position of a tetraacyldisaccharide 1-phosphate intermediate (termed DS-1- P) to form tetraacyldisaccharide 1,4'-bis-phosphate (lipid IVA)	ko:K00912	LpxK	-
contig_1036_np1212_1774	M	lolC	Lipoprotein releasing system, transmembrane protein	ko:K09808	FtsX,MacB_PCD	-
contig_1036_np1212_1811	M	-	Putative peptidoglycan binding domain	-	PG_binding_1	-
contig_1036_np1212_1823	M	lepA	Required for accurate and efficient protein synthesis under certain stress conditions. May act as a fidelity factor of the translation reaction, by catalyzing a one-codon backward translocation of tRNAs on improperly translocated ribosomes. Back- translocation proceeds from a post-translocation (POST) complex to a pre-translocation (PRE) complex, thus giving elongation factor G a second chance to…	ko:K03596	EFG_C,GTP_EFTU,GTP_EFTU_D2,LepA_C	-
contig_1036_np1212_1854	M	-	Chaperone	-	-	-
contig_1036_np1212_1892	M	lpxC	Catalyzes the hydrolysis of UDP-3-O-myristoyl-N- acetylglucosamine to form UDP-3-O-myristoylglucosamine and acetate, the committed step in lipid A biosynthesis	ko:K02535	LpxC	GO:0003674,GO:0003824,GO:0005488,GO:0005506,GO:0005575,GO:0005622,GO:0005623,GO:0005737,GO:0005975,GO:0006629,GO:0006643,GO:0006644,GO:0006664,GO:0006793,GO:0006796,GO:0008150,GO:0008152,GO:0008270,GO:0008610,GO:0008654,GO:0008759,GO:0009058,GO:0009245,GO:0009247,GO:0009311,GO:0009312,GO:0009987,GO:0016051,GO:0016787,GO:0016810,GO:0016811,GO:0019213,GO:0019637,GO:0043167,GO:0043169,GO:0044237,GO:…
contig_1036_np1212_1895	M	murC	Belongs to the MurCDEF family	ko:K01924	Mur_ligase,Mur_ligase_C,Mur_ligase_M	-
contig_1036_np1212_1896	M	murG	Cell wall formation. Catalyzes the transfer of a GlcNAc subunit on undecaprenyl-pyrophosphoryl-MurNAc-pentapeptide (lipid intermediate I) to form undecaprenyl-pyrophosphoryl-MurNAc- (pentapeptide)GlcNAc (lipid intermediate II)	ko:K02563	Glyco_tran_28_C,Glyco_transf_28	-
contig_1036_np1212_1897	M	ftsW	Peptidoglycan polymerase that is essential for cell division	ko:K03588	FTSW_RODA_SPOVE	-
contig_1036_np1212_1898	M	murD	Cell wall formation. Catalyzes the addition of glutamate to the nucleotide precursor UDP-N-acetylmuramoyl-L-alanine (UMA)	ko:K01925	Mur_ligase_C,Mur_ligase_M	-
contig_1036_np1212_1899	M	mraY	First step of the lipid cycle reactions in the biosynthesis of the cell wall peptidoglycan	ko:K01000	Glycos_transf_4,MraY_sig1	-
contig_1036_np1212_1900	M	murF	Involved in cell wall formation. Catalyzes the final step in the synthesis of UDP-N-acetylmuramoyl-pentapeptide, the precursor of murein	ko:K01929	Mur_ligase,Mur_ligase_C,Mur_ligase_M	-
contig_1036_np1212_1901	M	murE	Catalyzes the addition of meso-diaminopimelic acid to the nucleotide precursor UDP-N-acetylmuramoyl-L-alanyl-D-glutamate (UMAG) in the biosynthesis of bacterial cell-wall peptidoglycan	ko:K01928	Mur_ligase,Mur_ligase_C,Mur_ligase_M	-
contig_1036_np1212_1902	M	ftsI	Catalyzes cross-linking of the peptidoglycan cell wall at the division septum	ko:K03587	PBP_dimer,Transpeptidase	-
contig_1036_np1212_1943	M	slt	COG0741 Soluble lytic murein transglycosylase and related regulatory proteins (some contain LysM invasin domains)	ko:K08309	SLT,SLT_L	-
contig_1036_np1212_2052	M	-	Mandelate racemase / muconate lactonizing enzyme, C-terminal domain	ko:K01684	MR_MLE_C,MR_MLE_N	-
contig_1036_np1212_2114	M	mltD	COG0741 Soluble lytic murein transglycosylase and related regulatory proteins (some contain LysM invasin domains)	ko:K08307	LysM,SLT	GO:0003674,GO:0003824,GO:0005575,GO:0005623,GO:0008150,GO:0008932,GO:0008933,GO:0009893,GO:0016020,GO:0016740,GO:0016757,GO:0019222,GO:0030288,GO:0030313,GO:0031975,GO:0042597,GO:0043085,GO:0044093,GO:0044464,GO:0048518,GO:0050789,GO:0050790,GO:0051341,GO:0051353,GO:0061783,GO:0065007,GO:0065009
contig_1036_np1212_2123	M	-	Provides the (R)-glutamate required for cell wall biosynthesis	-	-	-
contig_1036_np1212_2163	M	kdsA	Belongs to the KdsA family	ko:K01627	DAHP_synth_1	-
contig_1036_np1212_2167	M	ctpA	Belongs to the peptidase S41A family	ko:K03797	PDZ_2,Peptidase_S41	-
contig_1036_np1212_2219	M	lolA	Participates in the translocation of lipoproteins from the inner membrane to the outer membrane. Only forms a complex with a lipoprotein if the residue after the N-terminal Cys is not an aspartate (The Asp acts as a targeting signal to indicate that the lipoprotein should stay in the inner membrane)	ko:K03634	LolA	-
contig_1036_np1212_2278	M	betS	Belongs to the BCCT transporter (TC 2.A.15) family	ko:K03451	BCCT	-
contig_1036_np1212_2297	M	-	Mechanosensitive ion channel	ko:K22044	MS_channel	-
contig_1036_np1212_2322	M	-	PFAM N-acetylneuraminic acid synthase	ko:K01654,ko:K15898	NeuB,SAF	-
contig_1036_np1212_2325	M	neuA	Acylneuraminate cytidylyltransferase	ko:K00983	CTP_transf_3,Lipase_GDSL_2	-
contig_1036_np1212_2327	M	capD	PFAM NAD-dependent epimerase dehydratase	ko:K15894,ko:K17716	Polysacc_synt_2	-
contig_1036_np1212_2358	M	mpl	Reutilizes the intact tripeptide L-alanyl-gamma-D- glutamyl-meso-diaminopimelate by linking it to UDP-N- acetylmuramate	ko:K02558	Mur_ligase,Mur_ligase_C,Mur_ligase_M	-
contig_1036_np1212_2369	M	-	Acetyltransferase (GNAT) domain	ko:K03823	Acetyltransf_1,Acetyltransf_4	-
contig_1036_np1212_2443	M	-	NlpB/DapX lipoprotein	ko:K07287	Lipoprotein_18	-
contig_1036_np1212_2506	M	amiB	N-acetylmuramoyl-L-alanine amidase	ko:K01448	AMIN,Amidase_3,LysM	-
contig_1036_np1212_2518	M	-	COG2885 Outer membrane protein and related peptidoglycan-associated (lipo)proteins	-	OmpA	-
contig_1036_np1212_2520	M	mltF	Murein-degrading enzyme that degrades murein glycan strands and insoluble, high-molecular weight murein sacculi, with the concomitant formation of a 1,6-anhydromuramoyl product. Lytic transglycosylases (LTs) play an integral role in the metabolism of the peptidoglycan (PG) sacculus. Their lytic action creates space within the PG sacculus to allow for its expansion as well as for the insertion of …	ko:K18691	SBP_bac_3,SLT	GO:0005575,GO:0005623,GO:0009279,GO:0016020,GO:0019867,GO:0030312,GO:0030313,GO:0031975,GO:0044462,GO:0044464,GO:0071944
contig_1036_np1212_2530	M	-	SprA-related family	-	SprA-related	-
contig_1036_np1212_2551	M	wecA	Catalyzes the transfer of the GlcNAc-1-phosphate moiety from UDP-GlcNAc onto the carrier lipid undecaprenyl phosphate (C55-P), yielding GlcNAc-pyrophosphoryl-undecaprenyl (GlcNAc-PP- C55)	ko:K02851,ko:K13007	Glycos_transf_4	-
contig_1036_np1212_2552	M	galE-1	Male sterility protein	-	Epimerase	-
contig_1036_np1212_2553	M	-	COG0463 Glycosyltransferases involved in cell wall biogenesis	ko:K13002	Glycos_transf_2	-
contig_1036_np1212_2554	M	-	Glycosyl transferases group 1	-	Glyco_transf_4,Glycos_transf_1	-
contig_1036_np1212_2557	M	-	Belongs to the NAD(P)-dependent epimerase dehydratase family. dTDP-glucose dehydratase subfamily	ko:K01710	GDP_Man_Dehyd	-
contig_1036_np1212_2560	M	-	WxcM-like, C-terminal	-	FdtA	-
contig_1036_np1212_2561	M	-	glycosyl transferase family 8	-	-	-
contig_1036_np1212_2566	M	-	transferase activity, transferring glycosyl groups	-	Glycos_transf_2,Methyltransf_21	-
contig_1036_np1212_2571	M	gmd	GDP-mannose 4,6 dehydratase	ko:K01711	GDP_Man_Dehyd	GO:0000271,GO:0003674,GO:0003824,GO:0005975,GO:0005976,GO:0006629,GO:0008150,GO:0008152,GO:0008446,GO:0008610,GO:0008653,GO:0009058,GO:0009059,GO:0009103,GO:0009987,GO:0016051,GO:0016829,GO:0016835,GO:0016836,GO:0033692,GO:0034637,GO:0034645,GO:0043170,GO:0044237,GO:0044238,GO:0044249,GO:0044255,GO:0044260,GO:0044262,GO:0044264,GO:0071704,GO:1901135,GO:1901137,GO:1901576,GO:1903509
contig_1036_np1212_2572	M	cpsB	Mannose-6-phosphate isomerase	ko:K00971,ko:K16011	MannoseP_isomer,NTP_transferase	-
contig_1036_np1212_2573	M	wbpO	Belongs to the UDP-glucose GDP-mannose dehydrogenase family	ko:K02474	UDPG_MGDP_dh,UDPG_MGDP_dh_C,UDPG_MGDP_dh_N	-
contig_1036_np1212_2574	M	wbpO	Belongs to the UDP-glucose GDP-mannose dehydrogenase family	ko:K02474	UDPG_MGDP_dh,UDPG_MGDP_dh_C,UDPG_MGDP_dh_N	-
contig_1036_np1212_2613	M	mtgA	Transglycosylase	ko:K03814	Transgly	-
contig_1036_np1212_2634	M	mrcA	penicillin-binding protein	ko:K05366	PCB_OB,Transgly,Transpeptidase	-
contig_1036_np1212_2641	M	-	Catalyzes the reduction of dTDP-6-deoxy-L-lyxo-4- hexulose to yield dTDP-L-rhamnose	ko:K00067	RmlD_sub_bind	-
contig_1036_np1212_2655	M	-	Peptidase M23	-	OapA,Peptidase_M23	-
contig_1036_np1212_2663	M	mrcB	Cell wall formation. Synthesis of cross-linked peptidoglycan from the lipid intermediates. The enzyme has a penicillin-insensitive transglycosylase N-terminal domain (formation of linear glycan strands) and a penicillin-sensitive transpeptidase C-terminal domain (cross-linking of the peptide subunits)	ko:K05365	Transgly,Transpeptidase,UB2H	-
contig_1036_np1212_2679	M	lpxB	Condensation of UDP-2,3-diacylglucosamine and 2,3- diacylglucosamine-1-phosphate to form lipid A disaccharide, a precursor of lipid A, a phosphorylated glycolipid that anchors the lipopolysaccharide to the outer membrane of the cell	ko:K00748	LpxB	-
contig_1036_np1212_2680	M	lpxA	Involved in the biosynthesis of lipid A, a phosphorylated glycolipid that anchors the lipopolysaccharide to the outer membrane of the cell	ko:K00677	Acetyltransf_11,Hexapep	GO:0003674,GO:0003824,GO:0005488,GO:0005515,GO:0005575,GO:0005622,GO:0005623,GO:0005737,GO:0005829,GO:0005975,GO:0006629,GO:0006643,GO:0006644,GO:0006664,GO:0006793,GO:0006796,GO:0008150,GO:0008152,GO:0008374,GO:0008610,GO:0008654,GO:0008780,GO:0009058,GO:0009245,GO:0009247,GO:0009311,GO:0009312,GO:0009987,GO:0016051,GO:0016740,GO:0016746,GO:0016747,GO:0019637,GO:0042802,GO:0044237,GO:0044238,GO:…
contig_1036_np1212_2682	M	lpxD	Catalyzes the N-acylation of UDP-3-O-acylglucosamine using 3-hydroxyacyl-ACP as the acyl donor. Is involved in the biosynthesis of lipid A, a phosphorylated glycolipid that anchors the lipopolysaccharide to the outer membrane of the cell	ko:K02536	Hexapep,Hexapep_2,LpxD	-
contig_1036_np1212_2683	M	bamA	Part of the outer membrane protein assembly complex, which is involved in assembly and insertion of beta-barrel proteins into the outer membrane	ko:K07277	Bac_surface_Ag,POTRA	-
contig_1036_np1212_2684	M	rseP	zinc metalloprotease	ko:K11749	PDZ,PDZ_2,Peptidase_M50	-
contig_1036_np1212_2704	M	-	Belongs to the peptidase S1C family	ko:K04771,ko:K04772	PDZ,PDZ_2,Trypsin_2	-
contig_1036_np1212_2711	M	-	Protein of unknown function (DUF2726)	-	DUF2726	-
contig_1036_np1212_2752	M	-	Glycosyl transferases group 1	-	Glyco_trans_1_4	-
contig_1036_np1212_2796	M	rhmD	Belongs to the mandelate racemase muconate lactonizing enzyme family	-	MR_MLE_C,MR_MLE_N	-
contig_1036_np1212_2863	M	dacA	Belongs to the peptidase S11 family	ko:K07258	PBP5_C,Peptidase_S11	GO:0000270,GO:0003674,GO:0003824,GO:0004175,GO:0004180,GO:0004185,GO:0005488,GO:0005575,GO:0005623,GO:0005886,GO:0005887,GO:0006022,GO:0006023,GO:0006024,GO:0006508,GO:0006807,GO:0008144,GO:0008150,GO:0008152,GO:0008233,GO:0008236,GO:0008238,GO:0008360,GO:0008658,GO:0009002,GO:0009058,GO:0009059,GO:0009252,GO:0009273,GO:0009987,GO:0016020,GO:0016021,GO:0016787,GO:0017171,GO:0019538,GO:0022603,GO:…
contig_1036_np1212_2864	M	rlpA	Lytic transglycosylase with a strong preference for naked glycan strands that lack stem peptides	ko:K03642	DPBB_1,SPOR	-
contig_1036_np1212_2865	M	mltB	Lytic murein transglycosylase	ko:K08305	SLT_2	-
contig_1036_np1212_2866	M	mrdB	Peptidoglycan polymerase that is essential for cell wall elongation	ko:K05837	FTSW_RODA_SPOVE	-
contig_1036_np1212_2867	M	mrdA	Catalyzes cross-linking of the peptidoglycan cell wall	ko:K05515	PBP_dimer,Transpeptidase	-
contig_1036_np1212_2911	M	-	protein involved in outer membrane biogenesis	ko:K07289	AsmA	-
contig_1036_np1212_2981	M	yiaD	Belongs to the ompA family	ko:K03286	Gly-zipper_Omp,Gly-zipper_YMGG,OmpA	-
contig_1036_np1212_2989	M	-	HlyD membrane-fusion protein of T1SS	ko:K02022,ko:K11003,ko:K12542	Biotin_lipoyl_2,HlyD,HlyD_3	-
contig_1036_np1212_3035	M	lnt	Transfers the fatty acyl group on membrane lipoproteins	ko:K03820	CN_hydrolase	-
contig_1036_np1212_3065	M	lgt	Transfers the N-acyl diglyceride group on what will become the N-terminal cysteine of membrane lipoproteins	ko:K13292	LGT	-
contig_1036_np1212_3085	M	ybiO	mechanosensitive ion channel	ko:K22044	MS_channel	GO:0005575,GO:0005623,GO:0005886,GO:0016020,GO:0044464,GO:0071944
contig_1036_np1212_3089	M	-	Glycosyl Transferase	-	Glyco_trans_4_2,Glyco_transf_4,Glycos_transf_1	-
contig_1036_np1212_3090	M	-	Glycosyl transferase group 1	-	Glyco_trans_1_4,Glycos_transf_1	-
contig_1036_np1212_3146	M	-	COG3209 Rhs family protein	-	RHS_repeat,SpvB,TcdB_toxin_midN,VCBS	-
contig_1036_np1212_3183	M	pbpC	Penicillin-Binding Protein C-terminus Family	ko:K05367	BiPBP_C,Transgly,Transpeptidase	GO:0003674,GO:0003824,GO:0005488,GO:0005575,GO:0008144,GO:0008150,GO:0008658,GO:0008955,GO:0016020,GO:0016021,GO:0016740,GO:0016757,GO:0016758,GO:0031224,GO:0031406,GO:0033218,GO:0033293,GO:0036094,GO:0043167,GO:0043168,GO:0043177,GO:0044425,GO:0048518,GO:0048522,GO:0050789,GO:0050794,GO:0051302,GO:0051781,GO:0065007,GO:0097159,GO:1901363,GO:1901681
contig_1036_np1212_3218	M	waaA	transferase	ko:K02527	Glycos_transf_1,Glycos_transf_N	-
contig_1036_np1212_3225	M	lpxL	Catalyzes the transfer of laurate from lauroyl-acyl carrier protein (ACP) to Kdo(2)-lipid IV(A) to form Kdo(2)- (lauroyl)-lipid IV(A)	ko:K02517	Lip_A_acyltrans	-
contig_1036_np1212_3227	M	waaC	COG0859 ADP-heptose LPS heptosyltransferase	ko:K02841	Glyco_transf_9	-
contig_1036_np1212_3228	M	waaF	heptosyltransferase	ko:K02843	Glyco_transf_9	-
contig_1036_np1212_3237	M	yqiC	long-chain fatty acid transporting porin activity	ko:K09806	BMFP	GO:0005575,GO:0005622,GO:0005623,GO:0005737,GO:0005829,GO:0044424,GO:0044444,GO:0044464
contig_1036_np1212_3248	M	-	Glycosyl transferase 4-like	ko:K00754	Glyco_trans_4_2,Glyco_transf_4,Glycos_transf_1	-
contig_1036_np1212_3249	M	-	glycosyl transferase	-	Glyco_transf_7C,Glycos_transf_2	-
contig_1036_np1212_3380	M	lpxL2	Lipid A biosynthesis acyltransferase	ko:K02517	Lip_A_acyltrans	-
contig_1036_np1212_3438	M	-	MltA-interacting MipA	ko:K07274	MipA	-
contig_1036_np1212_3458	M	-	Nad-dependent epimerase dehydratase	ko:K22025	Epimerase	-
contig_1036_np1212_3483	M	pglJ	glycosyl transferase group 1	ko:K17248	Glyco_transf_4,Glycos_transf_1	GO:0003674,GO:0003824,GO:0006464,GO:0006486,GO:0006487,GO:0006807,GO:0008150,GO:0008152,GO:0009058,GO:0009059,GO:0009100,GO:0009101,GO:0009987,GO:0016740,GO:0016757,GO:0016758,GO:0018193,GO:0018196,GO:0018279,GO:0019538,GO:0034645,GO:0036211,GO:0043170,GO:0043412,GO:0043413,GO:0044237,GO:0044238,GO:0044249,GO:0044260,GO:0044267,GO:0070085,GO:0071704,GO:1901135,GO:1901137,GO:1901564,GO:1901566,GO:…
contig_1036_np1212_3487	M	glmU	Catalyzes the last two sequential reactions in the de novo biosynthetic pathway for UDP-N-acetylglucosamine (UDP- GlcNAc). The C-terminal domain catalyzes the transfer of acetyl group from acetyl coenzyme A to glucosamine-1-phosphate (GlcN-1-P) to produce N-acetylglucosamine-1-phosphate (GlcNAc-1-P), which is converted into UDP-GlcNAc by the transfer of uridine 5- monophosphate (from uridine 5-tr…	ko:K04042	Hexapep,NTP_transf_3	-
contig_1036_np1212_3488	M	glmS	Catalyzes the first step in hexosamine metabolism, converting fructose-6P into glucosamine-6P using glutamine as a nitrogen source	ko:K00820	GATase_6,SIS	-
contig_1036_np1212_3569	M	ggt	gamma-glutamyltransferase	ko:K00681	G_glu_transpept	-
contig_1036_np1212_3570	M	ggt	gamma-glutamyltransferase	ko:K00681	G_glu_transpept	-
contig_1036_np1212_3592	M	slyB	Glycine zipper 2TM domain	ko:K06077	Rick_17kDa_Anti	GO:0005575,GO:0005623,GO:0009279,GO:0016020,GO:0019867,GO:0030312,GO:0030313,GO:0031975,GO:0044462,GO:0044464,GO:0071944
contig_1036_np1212_3654	M	-	Asp/Glu/Hydantoin racemase	ko:K01779	Asp_Glu_race	-
contig_1036_np1212_3664	M	-	RND efflux system, outer membrane lipoprotein	-	OEP	-
contig_1036_np1212_3666	M	-	Barrel-sandwich domain of CusB or HlyD membrane-fusion	-	Biotin_lipoyl_2,HlyD_3	-
contig_1036_np1212_3667	M	-	Protein of unknown function (DUF3313)	-	DUF3313	-
contig_1036_np1212_3668	M	-	surface antigen	-	-	-
contig_1036_np1212_3745	M	lspL	PFAM NAD-dependent epimerase dehydratase	ko:K08679,ko:K17947	Epimerase,GDP_Man_Dehyd	-
contig_1036_np1212_3854	M	bamD	Part of the outer membrane protein assembly complex, which is involved in assembly and insertion of beta-barrel proteins into the outer membrane	ko:K05807	YfiO	-
contig_1036_np1212_3903	M	-	COG4948 L-alanine-DL-glutamate epimerase and related enzymes of enolase superfamily	ko:K18983	MR_MLE_C,MR_MLE_N	-
contig_1036_np1212_3987	M	bamB	Part of the outer membrane protein assembly complex, which is involved in assembly and insertion of beta-barrel proteins into the outer membrane	ko:K17713	PQQ_2,PQQ_3	-
contig_1036_np1212_4068	M	lolB	Plays a critical role in the incorporation of lipoproteins in the outer membrane after they are released by the LolA protein	ko:K02494	LolB	-
contig_1036_np1212_4100	M	-	heme binding	-	-	-
contig_1036_np1212_2336	MNOU	flgJ	Rod binding protein	ko:K02395	Glucosaminidase,Rod-binding	-
contig_1036_np1212_63	MU	lspA	This protein specifically catalyzes the removal of signal peptides from prolipoproteins	ko:K03101	Peptidase_A8	-
contig_1036_np1212_291	MU	-	type I secretion outer membrane protein, TolC	ko:K12543	OEP,OmpA,SPOR	-
[truncated: 1,499 more rows]

## Sheet: Supp Table 13
Supplementary Table 13. Biosynthetic capabilities in asymbiotic annelids, siboglinids and in the main symbiont of Osedax frankpressi
step	Panther	Owenia	Capitella	Oasisia	Riftia	Paraescarpia	Lamellibrachia	Osedax	Osedax symbiont 9
A-II-1A	PTHR11751
A-II-1B	PTHR11751
A-III-1	PTHR11601
C-III-1	PTHR10314
C-III-2	PTHR11808
D_1	PTHR11879
E_1A	PTHR11606
E_1B	PTHR11606
G_II_1	PTHR22912
G_II_2	PTHR43757
G_II_3	PTHR11773
G_III_1A	PTHR21152
G_III_1B	PTHR45688
N_1	PTHR11772
P_1_2	PTHR11063
P_3	PTHR11645
Q_1	PTHR20852
R_II_1	PTHR11405
R_II_2	PTHR45753
R_II_3	PTHR11587
R_II_4	PTHR43814
S_I_1	PTHR42938
S_I_2	PTHR43247
S_I_3	PTHR43344
S_II_1	PTHR42938
S_II_2	PTHR10996
S_II_3	PTHR21152
Y_1	PTHR11473
V_1Aa	PTHR30239
V_1Ab	PTHR30239
V_1Ba	PTHR18968
V_1Bb	PTHR30239
V_2	PTHR21371
V_3	PTHR43661
V_4	PTHR42743
L_1	PTHR10277
L_2_3_a	PTHR43822
L_2_3_b	PTHR43345
L_4A	PTHR42979
L_4B	PTHR43275
L_5	PTHR42743
I_I_1A	PTHR48078
I_I_1B	PTHR48078
I_I_2Aa	PTHR30239
I_I_2Ab	PTHR30239
I_I_2Ba	PTHR18968
I_I_2Bb	PTHR30239
I_I_3	PTHR21371
I_I_4	PTHR43661
I_I_5	PTHR42743
I_II_1	PTHR10277
I_II_2_3_a	PTHR43822
I_II_2_3_b	PTHR43345
I_II_4	PTHR42979
I_II_5Aa	PTHR30239
I_II_5Ab	PTHR30239
I_II_5Ba	PTHR18968
I_II_5Bb	PTHR30239
I_II_6	PTHR21371
I_II_7	PTHR43661
I_II_8	PTHR42743
I_III_1	PTHR48101
I_III_3Aa	PTHR30239
I_III_3Ab	PTHR30239
I_III_3Ba	PTHR18968
I_III_3Bb	PTHR30239
I_III_4	PTHR21371
I_III_5	PTHR43661
I_III_6	PTHR42743
I_IV_1	PTHR43347
I_IV_2	PTHR11516
I_IV_3Aa	PTHR30239
I_IV_3Ab	PTHR30239
I_IV_3Ba	PTHR18968
I_IV_3Bb	PTHR30239
I_IV_4	PTHR21371
I_IV_5	PTHR43661
I_IV_6	PTHR42743
I_V_1	PTHR24095
I_V_2	PTHR11516
I_V_3	PTHR42743
M_I_1	PTHR20919
M_I_2	PTHR11808
M_I_3A	PTHR43500
M_I_3B	PTHR43525
M_I_4A	PTHR45833
M_I_4B	PTHR30519
M_II_1	PTHR20861
M_II_2	PTHR43379
M_II_3A	PTHR43500
M_II_3B	PTHR43525
M_II_4	PTHR30519
M_III_1	PTHR32268
M_III_2	PTHR43797
M_III_3A	PTHR45833
M_III_3B	PTHR30519
M_IV_1	PTHR21499
M_IV_2	PTHR46278
M_IV_3	PTHR48108
F_I_1	PTHR21145
F_I_2	PTHR21022
F_I_3	PTHR42743
F_II_1	PTHR21145
F_II_2	PTHR43795
F_II_3	PTHR21022
F_III_1	PTHR21022
F_III_2	PTHR42832
T_1	PTHR20861
T_2	PTHR42690
K_I_1	PTHR21499
K_I_2	PTHR46278
K_I_3	PTHR12128
K_I_4	PTHR20836
K_I_5	PTHR19136
K_I_6A	PTHR11986
K_I_6B	PTHR43247
K_I_7	PTHR43270
K_I_8	PTHR31689
K_I_9	PTHR43727
K_II_1	PTHR21499
K_II_2	PTHR46278
K_II_3	PTHR12128
K_II_4	PTHR20836
K_II_5	PTHR43300
K_II_6	PTHR43795
K_II_7	PTHR11014
K_II_8	PTHR31689
K_II_9	PTHR43727
K_III_1	PTHR21499
K_III_2	PTHR46278
K_III_3	PTHR12128
K_III_4	PTHR20836
K_III_5	PTHR43026
K_III_6	PTHR43727
K_IV_1	PTHR10277
K_IV_2_3	PTHR43822
K_IV_4	PTHR11835
K_IV_5	PTHR42790
K_IV_6_7	PTHR44845
K_IV_8	PTHR11133
K_IV_9	PTHR11133
K_V_1	PTHR10277
K_V_2_3	PTHR43822
K_V_4	PTHR11835
K_V_5	PTHR42790
K_V_6	PTHR21621
K_V_7	PTHR23342
K_V_8	PTHR32338
K_V_9	PTHR43808
K_VI_1	PTHR21499
K_VI_2	PTHR46278
K_VI_3	PTHR12128
K_VI_4	PTHR20836
K_VI_5	PTHR43144
K_VI_6	PTHR31689
K_VI_7	PTHR43727
H_1	PTHR21403
H_2_3	PTHR42945
H_4	PTHR43090
H_5a	PTHR42701
H_5b	PTHR21235
H_6	PTHR23133
H_7	PTHR42885
H_8	PTHR23133
H_9	PTHR11596
H_10_11	PTHR21256
W_1a	PTHR11236
W_1b	PTHR43418
W_2	PTHR43418
W_3_4	PTHR22854
W_5	PTHR43406
W_6	PTHR48077
Nit_1Aa	PTHR43105
Nit_1Ab	PTHR43518
Nit_1Ac	PTHR30598
Nit_1Ad	PTHR43680
Nit_1Ba	PTHR11615
Nit_1Bb	PTHR38604
Nit_2a	PTHR43809
Nit_2b	PTHR40562
Nit_3	PTHR20852
Nit_4	PTHR11938
Nit_5	PTHR11606
Nit_6_7	PTHR30602
Nit_8	PTHR23342
Nit_9	PTHR32338
Nit_10	PTHR11986
Nit_11	PTHR43808
Nit_12	PTHR23100
Nit_13	PTHR45753
Nit_14	PTHR11587
Nit_15	PTHR43814
Nit_16	PTHR43782
Nit_17	PTHR33569
Nit_18	PTHR43295
Nit_19	PTHR11358
Nit_20	PTHR31377
Nit_21	PTHR43674
Nit_22	PTHR45229
Nit_23	PTHR11558
Nit_24	PTHR46315
Nit_25	PTHR10742
Nit_26	PTHR33866
Nit_27	PTHR11405
Nit_28	PTHR11405
Nit_29	PTHR11405
Nit_30	PTHR43137
Nit_31	PTHR48109
CoA_1	PTHR12280
CoA_2	PTHR12290
CoA_3	PTHR14359
CoA_4	PTHR10695
B1_1	PTHR20857
B1_2	PTHR30270
B2_1	PTHR21327
B2_2	PTHR11079
B2_3A	PTHR46470
B2_3B	PTHR10000
B2_4	PTHR21327
B2_5	PTHR21058
B2_6	PTHR21098
B3_1	PTHR42716
B3_2	PTHR30573
B3_3	PTHR32179
B3_4X	PTHR11080
B3_4Y	PTHR43463
B5_1	PTHR20881
B5_2	PTHR43765
B5_3	PTHR21299
B6_1	PTHR43148
B6_2	PTHR42938
B6_3	PTHR43247
B6_4	PTHR30004
B6_5	PTHR30456
B6_6	PTHR10851
B7_1	PTHR43464
B7_2_6_A	PTHR11712
B7_2_6_B	PTHR11712
B7_3_7	PTHR42760
B7_4_8	PTHR30272
B7_5_9	PTHR43159
B7_10	PTHR43194
B7_11	PTHR13693
B7_12	PTHR42684
B7_13	PTHR43210
B7_14_15	PTHR22976
B9_1	PTHR20941
B9_2	PTHR11136
B9_3A	PTHR48069
B9_3B	PTHR43639
B12_1	PTHR43311
B12_2	PTHR43013
B12_3	PTHR43713
B12_4	PTHR11458
B12_5	PTHR11557
B12_6	PTHR38042
B12_7_8	PTHR45790
B12_9	PTHR43467
B12_10	PTHR32439
B12_11	PTHR47036
B12_12	PTHR45790
B12_13	PTHR43467
B12_14	PTHR36925
B12_15_16	PTHR43182
B12_17	PTHR43588
B12_18	PTHR43873
B12_19	PTHR44119
B12_20_21_22	PTHR46638
B12_23	PTHR21343
B12_24	PTHR43527
B12_25	PTHR42885
B12_26	PTHR34308
B12_27	PTHR34848
B12_28	PTHR22749
B12_29	PTHR43644
B12_30	PTHR43463
B12_31	PTHR43463
B12_32	PTHR34148
B12_33	PTHR48100

## Sheet: Supp Table 15
Supplementary Table 15. Pattern recognition receptors in O. frankpressi
protein_id	Entry	Protein names	Entry name	Gene names	Organism	PANTHERID	PANTHER_annotation	pfam	body	roots
PGRP
OFRAG00000006827.1				PGRP1_HUMAN^PGRP1_HUMAN^Q:1015-1545,H:32-195^31.461%ID^E:5.06e-17^RecName: Full=Peptidoglycan recognition protein 1;^Eukaryota; Metazoa; Chordata; Craniata; Vertebrata; Euteleostomi; Mammalia; Eutheria; Euarchontoglires; Primates; Haplorrhini; Catarrhini; Hominidae; Homo		PTHR11022:SF65	PEPTIDOGLYCAN RECOGNITION PROTEIN 5	PF18738.2^HEPN_DZIP3^DZIP3/ hRUL138-like HEPN^154-222^E:5.9e-06	1.73746	34.9607
TOLL-LIKE
OFRAG00000015060.1	A0A210QS10	A0A210QS10_MIZYE	Toll-like receptor 13	KP79_PYT22224	Mizuhopecten yessoensis (Japanese scallop) (Patinopecten yessoensis)	PTHR45617	FAMILY NOT NAMED	PF13306.7^LRR_5^BspA type Leucine rich repeat region (6 copies)^20-104^E:0.013`PF00560.34^LRR_1^Leucine Rich Repeat^36-49^E:330`PF13516.7^LRR_6^Leucine Rich repeat^37-44^E:480`PF13516.7^LRR_6^Leucine Rich repeat^56-68^E:110`PF00560.34^LRR_1^Leucine Rich Repeat^57-71^E:63`PF13516.7^LRR_6^Leucine Rich repeat^78-93^E:0.012`PF00560.34^LRR_1^Leucine Rich Repeat^80-99^E:0.1	0	0
OFRAG00000015066.1	A0A210QS10	A0A210QS10_MIZYE	Toll-like receptor 13	KP79_PYT22224	Mizuhopecten yessoensis (Japanese scallop) (Patinopecten yessoensis)	PTHR24366:SF122	KEKKON-2	PF13306.7^LRR_5^BspA type Leucine rich repeat region (6 copies)^21-102^E:0.01`PF00560.34^LRR_1^Leucine Rich Repeat^36-50^E:60`PF13516.7^LRR_6^Leucine Rich repeat^37-44^E:220`PF13516.7^LRR_6^Leucine Rich repeat^56-68^E:110`PF00560.34^LRR_1^Leucine Rich Repeat^57-71^E:63`PF13516.7^LRR_6^Leucine Rich repeat^78-93^E:0.012`PF00560.34^LRR_1^Leucine Rich Repeat^80-99^E:0.1	0	0
OFRAG00000015761.1	A0A210QS10	A0A210QS10_MIZYE	Toll-like receptor 13	KP79_PYT22224	Mizuhopecten yessoensis (Japanese scallop) (Patinopecten yessoensis)	PTHR24366:SF122	KEKKON-2	PF13855.7^LRR_8^Leucine rich repeat^35-91^E:1.3e-08`PF00560.34^LRR_1^Leucine Rich Repeat^36-49^E:280`PF13516.7^LRR_6^Leucine Rich repeat^37-44^E:310`PF13516.7^LRR_6^Leucine Rich repeat^56-68^E:110`PF13855.7^LRR_8^Leucine rich repeat^57-102^E:2.4e-06`PF00560.34^LRR_1^Leucine Rich Repeat^57-71^E:63`PF13516.7^LRR_6^Leucine Rich repeat^78-93^E:0.012`PF00560.34^LRR_1^Leucine Rich Repeat^80-99^E:0.1	0	0
OFRAG00000015064.1	A0A210QS10	A0A210QS10_MIZYE	Toll-like receptor 13	KP79_PYT22224	Mizuhopecten yessoensis (Japanese scallop) (Patinopecten yessoensis)	PTHR45836:SF16	LEUCINE-RICH REPEAT AND TRANSMEMBRANE DOMAIN-CONTAINING PROTEIN 2	PF00560.34^LRR_1^Leucine Rich Repeat^2-14^E:390`PF13516.7^LRR_6^Leucine Rich repeat^2-8^E:590`PF13516.7^LRR_6^Leucine Rich repeat^20-30^E:360`PF00560.34^LRR_1^Leucine Rich Repeat^21-35^E:15`PF13516.7^LRR_6^Leucine Rich repeat^42-57^E:0.77`PF00560.34^LRR_1^Leucine Rich Repeat^44-63^E:1.9	0	0
OFRAG00000015062.1	A0A210QS10	A0A210QS10_MIZYE	Toll-like receptor 13	KP79_PYT22224	Mizuhopecten yessoensis (Japanese scallop) (Patinopecten yessoensis)	PTHR45617:SF69	SI:DKEY-1J5.4	PF00560.34^LRR_1^Leucine Rich Repeat^55-61^E:18000`PF00560.34^LRR_1^Leucine Rich Repeat^100-113^E:430`PF13516.7^LRR_6^Leucine Rich repeat^101-107^E:740`PF13516.7^LRR_6^Leucine Rich repeat^119-129^E:700`PF00560.34^LRR_1^Leucine Rich Repeat^120-135^E:20`PF13516.7^LRR_6^Leucine Rich repeat^141-156^E:1.5`PF00560.34^LRR_1^Leucine Rich Repeat^143-162^E:3.9	0	0
OFRAG00000007228.1	A0A3B3QR36	A0A3B3QR36_9TELE	Toll like receptor 3	0	Paramormyrops kingsleyae	PTHR24373	SLIT RELATED LEUCINE-RICH REPEAT NEURONAL PROTEIN	PF13855.7^LRR_8^Leucine rich repeat^57-116^E:4.1e-10`PF13516.7^LRR_6^Leucine Rich repeat^57-69^E:13`PF13306.7^LRR_5^BspA type Leucine rich repeat region (6 copies)^58-148^E:0.0041`PF00560.34^LRR_1^Leucine Rich Repeat^59-71^E:800`PF13516.7^LRR_6^Leucine Rich repeat^80-92^E:77`PF00560.34^LRR_1^Leucine Rich Repeat^81-95^E:330`PF13855.7^LRR_8^Leucine rich repeat^85-139^E:8.3e-09`PF13516.7^LRR_6^Leuci…	0	0
OFRAG00000005825.1	A0A1S3HFY9	A0A1S3HFY9_LINUN	toll-like receptor 13	LOC106154554	Lingula unguis	PTHR24365:SF530	MSTPROX-RELATED	PF13516.7^LRR_6^Leucine Rich repeat^229-244^E:26`PF00560.34^LRR_1^Leucine Rich Repeat^233-245^E:780`PF13516.7^LRR_6^Leucine Rich repeat^284-291^E:11000`PF00560.34^LRR_1^Leucine Rich Repeat^284-293^E:4300`PF13516.7^LRR_6^Leucine Rich repeat^352-360^E:14000`PF00560.34^LRR_1^Leucine Rich Repeat^401-411^E:18000`PF13516.7^LRR_6^Leucine Rich repeat^423-438^E:0.13`PF13855.7^LRR_8^Leucine rich repeat^426…	8.77322	26.6895
OFRAG00000015162.1	A0A2R3SK02	A0A2R3SK02_ARGIR	Toll-like receptor 1	0	Argopecten irradians (Bay scallop) (Aequipecten irradians)	PTHR24365:SF543	TOLL-LIKE RECEPTOR 13	PF13855.7^LRR_8^Leucine rich repeat^19-76^E:3.5e-10`PF13516.7^LRR_6^Leucine Rich repeat^21-28^E:8900`PF13516.7^LRR_6^Leucine Rich repeat^40-52^E:3.7`PF13516.7^LRR_6^Leucine Rich repeat^65-76^E:1100`PF13516.7^LRR_6^Leucine Rich repeat^87-99^E:1.2`PF13516.7^LRR_6^Leucine Rich repeat^137-145^E:9600`PF13516.7^LRR_6^Leucine Rich repeat^214-227^E:200`PF13855.7^LRR_8^Leucine rich repeat^237-296^E:2.1e-0…	9.93158	10.9133
OFRAG00000015391.1	K1RAH5	K1RAH5_CRAGI	Toll-like receptor 6	CGI_10025722	Crassostrea gigas (Pacific oyster) (Crassostrea angulata)	PTHR24365:SF543	TOLL-LIKE RECEPTOR 13	PF13516.7^LRR_6^Leucine Rich repeat^64-77^E:150`PF13855.7^LRR_8^Leucine rich repeat^87-146^E:4.1e-07`PF13516.7^LRR_6^Leucine Rich repeat^87-99^E:48`PF13855.7^LRR_8^Leucine rich repeat^110-169^E:1.2e-07`PF13516.7^LRR_6^Leucine Rich repeat^110-124^E:0.36`PF13516.7^LRR_6^Leucine Rich repeat^159-169^E:340`PF13855.7^LRR_8^Leucine rich repeat^182-223^E:4.6e-07`PF13855.7^LRR_8^Leucine rich repeat^188-24…	16.5634	11.2749
Scavenger receptor
OFRAG00000000043.1	A0A0L8GSK3	A0A0L8GSK3_OCTBM	Uncharacterized protein	OCBIM_22028676mg	Octopus bimaculoides (California two-spotted octopus)	PTHR11923	SCAVENGER RECEPTOR CLASS B TYPE-1 SR-B1	PF01130.22^CD36^CD36 family^4-389^E:5.5e-118	60.6378	39.1804
OFRAG00000002552.1	R7T8I8	R7T8I8_CAPTE	Uncharacterized protein	CAPTEDRAFT_189109	Capitella teleta (Polychaete worm)	PTHR11923	SCAVENGER RECEPTOR CLASS B TYPE-1 SR-B1	PF01130.22^CD36^CD36 family^14-472^E:1e-116	15.7847	18.9992
Fibrinogen
OFRAG00000002730.1	K7GFV5	K7GFV5_PELSI	Fibrinogen C-terminal domain-containing protein	0	Pelodiscus sinensis (Chinese softshell turtle) (Trionyx sinensis)	PTHR19143	FIBRINOGEN/TENASCIN/ANGIOPOEITIN	PF00147.19^Fibrinogen_C^Fibrinogen beta and gamma chains, C-terminal globular domain^40-216^E:7.5e-31	0.199293	0.44774
OFRAG00000011787.1	A0A1B0BGC2	A0A1B0BGC2_9MUSC	Fibrinogen C-terminal domain-containing protein	0	Glossina palpalis gambiensis	PTHR19143:SF378	SUBFAMILY NOT NAMED	PF00147.19^Fibrinogen_C^Fibrinogen beta and gamma chains, C-terminal globular domain^16-64^E:3.1e-17	0.227712	0
OFRAG00000013671.1	G1KYB1	G1KYB1_ANOCA	Fibrinogen C-terminal domain-containing protein	0	Anolis carolinensis (Green anole) (American chameleon)	PTHR19143:SF327	ZGC:194887	PF00147.19^Fibrinogen_C^Fibrinogen beta and gamma chains, C-terminal globular domain^93-170^E:6e-18	0	0
OFRAG00000011786.1	V4ACJ9	V4ACJ9_LOTGI	Fibrinogen C-terminal domain-containing protein (Fragment)	LOTGIDRAFT_118333	Lottia gigantea (Giant owl limpet)	PTHR19143:SF222	ANGIOPOIETIN-RELATED PROTEIN 3	PF00147.19^Fibrinogen_C^Fibrinogen beta and gamma chains, C-terminal globular domain^14-47^E:3.2e-05	0.138397	0.15523
OFRAG00000011789.1	A0A210PDK2	A0A210PDK2_MIZYE	Fibrinogen-like protein 1	KP79_PYT24849	Mizuhopecten yessoensis (Japanese scallop) (Patinopecten yessoensis)	PTHR19143	FIBRINOGEN/TENASCIN/ANGIOPOEITIN	PF00147.19^Fibrinogen_C^Fibrinogen beta and gamma chains, C-terminal globular domain^51-139^E:5.1e-26	0.375241	0.0825725
C-type lectin
OFRAG00000007441.1	A0A2R2MTZ4	A0A2R2MTZ4_LINUN	uncharacterized protein LOC106151371	LOC106151371	Lingula unguis	PTHR24033:SF181	C-TYPE LECTIN	PF00059.22^Lectin_C^Lectin C-type domain^70-188^E:5.6e-10`PF00057.19^Ldl_recept_a^Low-density lipoprotein receptor domain class A^190-222^E:6.5e-09`PF00431.21^CUB^CUB domain^244-341^E:4.9e-05`PF00431.21^CUB^CUB domain^451-516^E:2.6e-05`PF13385.7^Laminin_G_3^Concanavalin A-like lectin/glucanases superfamily^771-895^E:2.4e-08`PF07699.14^Ephrin_rec_like^Putative ephrin-receptor like^1240-1290^E:4e-1…	0.0275031	2.05056
OFRAG00000007835.1	R7UWY0	R7UWY0_CAPTE	Uncharacterized protein	CAPTEDRAFT_209385	Capitella teleta (Polychaete worm)	PTHR22803	MANNOSE, PHOSPHOLIPASE, LECTIN RECEPTOR RELATED	PF01822.20^WSC^WSC domain^126-208^E:3.5e-12`PF00059.22^Lectin_C^Lectin C-type domain^304-415^E:1.2e-13	15.1684	0.36708
OFRAG00000008550.1	A0A5C6PK88	A0A5C6PK88_9TELE	Neurocan core protein	D4764_10G0003760	Takifugu flavidus (sansaifugu)	PTHR22803	MANNOSE, PHOSPHOLIPASE, LECTIN RECEPTOR RELATED	PF00059.22^Lectin_C^Lectin C-type domain^74-179^E:2.8e-12`PF00059.22^Lectin_C^Lectin C-type domain^231-294^E:4.7e-06	0.396896	0.0554686
OFRAG00000008747.1	R7UWY0	R7UWY0_CAPTE	Uncharacterized protein	CAPTEDRAFT_209385	Capitella teleta (Polychaete worm)	PTHR45784	C-TYPE LECTIN DOMAIN FAMILY 20 MEMBER A-RELATED	PF00059.22^Lectin_C^Lectin C-type domain^107-183^E:1.9e-05`PF01822.20^WSC^WSC domain^172-247^E:1.9e-12`PF00059.22^Lectin_C^Lectin C-type domain^332-435^E:2.1e-15	0.205808	0.0181333
OFRAG00000010198.1	T1ERH7	T1ERH7_HELRO	C-type lectin domain-containing protein	20199177 HELRODRAFT_161459	Helobdella robusta (Californian leech)	PTHR22803:SF110	SUBFAMILY NOT NAMED	PF00059.22^Lectin_C^Lectin C-type domain^333-447^E:4.2e-14	50.3723	6.03071
OFRAG00000013883.1	R7UWY0	R7UWY0_CAPTE	Uncharacterized protein	CAPTEDRAFT_209385	Capitella teleta (Polychaete worm)	PTHR45784	C-TYPE LECTIN DOMAIN FAMILY 20 MEMBER A-RELATED	PF00059.22^Lectin_C^Lectin C-type domain^357-452^E:8.4e-09	0.0829409	0.0384882
OFRAG00000014195.1	A0A0L8GC49	A0A0L8GC49_OCTBM	C-type lectin domain-containing protein	OCBIM_22036042mg	Octopus bimaculoides (California two-spotted octopus)	PTHR22803:SF116	REGENERATING ISLET-DERIVED PROTEIN 4	PF00059.22^Lectin_C^Lectin C-type domain^49-160^E:2.1e-11	31.924	113.383
OFRAG00000014195.2	A0A0L8GC49	A0A0L8GC49_OCTBM	C-type lectin domain-containing protein	OCBIM_22036042mg	Octopus bimaculoides (California two-spotted octopus)	PTHR45784	C-TYPE LECTIN DOMAIN FAMILY 20 MEMBER A-RELATED	PF00059.22^Lectin_C^Lectin C-type domain^49-160^E:3.3e-11`PF11921.9^DUF3439^Domain of unknown function (DUF3439)^136-199^E:2.3e-06	30.0311	40.1672
bactericidal permeability increasing protein
OFRAG00000001794.1	A0A481MSN3	A0A481MSN3_9ANNE	BPI protein (Fragment)	0	Perinereis linea	PTHR10504	BACTERICIDAL PERMEABILITY-INCREASING BPI PROTEIN-RELATED	.	0	0.132648

## Sheet: Supp Table 16
Supplementary Table 16. Pattern recognition receptors in Oasisia alvinae
protein_id	Entry	Protein names	Entry name	Gene names	Organism	PANTHERID	PANTHER_annotation	pfam	crown_1	opistosoma_1	trophosome_1	crown_2	opistosoma_2	trophosome_2
PGRP
OALVG00000008907.1	A0A067YFR4	Peptidoglycan recognition protein	A0A067YFR4_HALDI	PGRP	Haliotis discus discus (disc abalone)	PTHR11022	PEPTIDOGLYCAN RECOGNITION PROTEIN	PF01510.26^Amidase_2^N-acetylmuramoyl-L-alanine amidase^4-67^E:8.2e-08	0.563664	2.00449	1.17586	0	10.4183	2.29558
OALVG00000025058.1	T1YDG3	Peptidoglycan recognition protein S1	T1YDG3_HYRCU	0	Hyriopsis cumingii (Triangle sail mussel) (Unio cumingii)	PTHR11022	PEPTIDOGLYCAN RECOGNITION PROTEIN	PF01510.26^Amidase_2^N-acetylmuramoyl-L-alanine amidase^450-577^E:1.7e-18	56.4974	132.008	4.98627	44.1373	46.4199	125.274
OALVG00000006672.1	Q32S45	Peptidoglycan-recognition protein	Q32S45_EUPSC	PGRP2	Euprymna scolopes (Hawaiian bobtail squid)	PTHR11022	PEPTIDOGLYCAN RECOGNITION PROTEIN	PF01510.26^Amidase_2^N-acetylmuramoyl-L-alanine amidase^122-248^E:2.8e-17	12.1379	0.0631847	0.127326	92.9383	0	0.894229
OALVG00000006678.1	Q32S45	Peptidoglycan-recognition protein	Q32S45_EUPSC	PGRP2	Euprymna scolopes (Hawaiian bobtail squid)	PTHR11022	PEPTIDOGLYCAN RECOGNITION PROTEIN	PF01510.26^Amidase_2^N-acetylmuramoyl-L-alanine amidase^70-204^E:5.8e-19	0.732363	0.0906383	0	0	10.5038	0
OALVG00000006680.1	Q32S45	Peptidoglycan-recognition protein	Q32S45_EUPSC	PGRP2	Euprymna scolopes (Hawaiian bobtail squid)	PTHR11022	PEPTIDOGLYCAN RECOGNITION PROTEIN	PF01510.26^Amidase_2^N-acetylmuramoyl-L-alanine amidase^75-212^E:2.4e-17	0.282134	27.8443	0	2.88771	1418.39	0
OALVG00000006683.1	Q32S45	Peptidoglycan-recognition protein	Q32S45_EUPSC	PGRP2	Euprymna scolopes (Hawaiian bobtail squid)	PTHR11022	PEPTIDOGLYCAN RECOGNITION PROTEIN	PF01510.26^Amidase_2^N-acetylmuramoyl-L-alanine amidase^83-209^E:7.6e-19	30.47	0.11563	0.856596	0.527948	1.26529	85.3383
OALVG00000017812.1	A0A2C9JD08	Peptidoglycan-recognition protein	A0A2C9JD08_BIOGL	0	Biomphalaria glabrata (Bloodfluke planorb) (Freshwater snail)	PTHR11022	PEPTIDOGLYCAN RECOGNITION PROTEIN	PF01510.26^Amidase_2^N-acetylmuramoyl-L-alanine amidase^11-137^E:2.6e-25	0.313568	0	0.0543151	0	0	0.165466
OALVG00000017819.1	A0A023GMN1	Peptidoglycan-recognition protein	A0A023GMN1_9ACAR	0	Amblyomma triste (Neotropical tick)	PTHR11022	PEPTIDOGLYCAN RECOGNITION PROTEIN	PF01510.26^Amidase_2^N-acetylmuramoyl-L-alanine amidase^46-172^E:4.7e-24	0	0.0595183	0	0	0.0775996	0
OALVG00000017820.1	A0A023GMN1	Peptidoglycan-recognition protein	A0A023GMN1_9ACAR	0	Amblyomma triste (Neotropical tick)	PTHR11022	PEPTIDOGLYCAN RECOGNITION PROTEIN	PF01510.26^Amidase_2^N-acetylmuramoyl-L-alanine amidase^46-172^E:5.2e-24	0	0.178555	0	0	0.0775996	0
OALVG00000025204.1	A0A0G3BE90	Peptidoglycan-recognition protein	A0A0G3BE90_9CRUS	0	Artemia sinica	PTHR11022	PEPTIDOGLYCAN RECOGNITION PROTEIN	PF01510.26^Amidase_2^N-acetylmuramoyl-L-alanine amidase^35-161^E:1.6e-23	0	2.29247	0.377361	1.88485	12.7265	4.25591
OALVG00000025204.2	V3ZUU1	Peptidoglycan-recognition protein	V3ZUU1_LOTGI	LOTGIDRAFT_168576	Lottia gigantea (Giant owl limpet)	PTHR11022	PEPTIDOGLYCAN RECOGNITION PROTEIN	PF01510.26^Amidase_2^N-acetylmuramoyl-L-alanine amidase^41-167^E:1.8e-23	0.408518	26.9234	1.31091	0	0	0
OALVG00000031996.1	Q32S45	Peptidoglycan-recognition protein	Q32S45_EUPSC	PGRP2	Euprymna scolopes (Hawaiian bobtail squid)	PTHR11022	PEPTIDOGLYCAN RECOGNITION PROTEIN	PF01510.26^Amidase_2^N-acetylmuramoyl-L-alanine amidase^166-292^E:2e-17	3.21861	7.23935	1.88782	3.59133	3.62753	9.12256
OALVG00000006673.1	A0A482B121	PGRP	A0A482B121_RUDPH	0	Ruditapes philippinarum (Japanese littleneck clam) (Venerupis philippinarum)	PTHR11022	PEPTIDOGLYCAN RECOGNITION PROTEIN	PF01510.26^Amidase_2^N-acetylmuramoyl-L-alanine amidase^126-260^E:1.5e-20	24.0338	0.0324104	0.36586	0	0	0.199487
OALVG00000006679.1	A0A482B121	PGRP	A0A482B121_RUDPH	0	Ruditapes philippinarum (Japanese littleneck clam) (Venerupis philippinarum)	PTHR11022	PEPTIDOGLYCAN RECOGNITION PROTEIN	PF01510.26^Amidase_2^N-acetylmuramoyl-L-alanine amidase^71-198^E:2.4e-19	0.0853632	35.7501	0.174596	4.07862	2821.41	1.14138
TOLL-LIKE
OALVG00000010608.1	A0A1S3JZG3	toll-like receptor 1	A0A1S3JZG3_LINUN	LOC106177293	Lingula unguis	PTHR24365:SF543	TOLL-LIKE RECEPTOR 13	PF13855.7^LRR_8^Leucine rich repeat^3-54^E:1.4e-09`PF13306.7^LRR_5^BspA type Leucine rich repeat region (6 copies)^4-86^E:0.19`PF13516.7^LRR_6^Leucine Rich repeat^21-30^E:230`PF00560.34^LRR_1^Leucine Rich Repeat^22-40^E:80`PF00560.34^LRR_1^Leucine Rich Repeat^43-59^E:2500`PF13855.7^LRR_8^Leucine rich repeat^67-126^E:1.6e-11`PF13306.7^LRR_5^BspA type Leucine rich repeat region (6 copies)^80-174^E:…	0.0261924	0	0.277056	0	0.253768	0.0426682
OALVG00000006890.1	A0A1S3HFY9	toll-like receptor 13	A0A1S3HFY9_LINUN	LOC106154554	Lingula unguis	PTHR24365:SF543	TOLL-LIKE RECEPTOR 13	PF13306.7^LRR_5^BspA type Leucine rich repeat region (6 copies)^78-145^E:0.014`PF00560.34^LRR_1^Leucine Rich Repeat^92-100^E:14000`PF00560.34^LRR_1^Leucine Rich Repeat^132-143^E:3500`PF00560.34^LRR_1^Leucine Rich Repeat^221-240^E:13`PF13516.7^LRR_6^Leucine Rich repeat^221-232^E:47`PF13516.7^LRR_6^Leucine Rich repeat^244-256^E:8300`PF00560.34^LRR_1^Leucine Rich Repeat^274-282^E:1400`PF13516.7^LRR_…	0.63271	0.410479	0.225953	0.493293	1.37761	0.267398
OALVG00000006893.1	A0A1S3HFY9	toll-like receptor 13	A0A1S3HFY9_LINUN	LOC106154554	Lingula unguis	PTHR24365:SF543	TOLL-LIKE RECEPTOR 13	PF13306.7^LRR_5^BspA type Leucine rich repeat region (6 copies)^81-166^E:0.07`PF00560.34^LRR_1^Leucine Rich Repeat^135-143^E:18000`PF13516.7^LRR_6^Leucine Rich repeat^224-236^E:44`PF00560.34^LRR_1^Leucine Rich Repeat^225-245^E:7.2`PF13516.7^LRR_6^Leucine Rich repeat^276-285^E:940`PF00560.34^LRR_1^Leucine Rich Repeat^373-380^E:4000`PF00560.34^LRR_1^Leucine Rich Repeat^396-413^E:18000`PF13516.7^LRR…	0.0169274	0.189622	0.093794	0.0697573	1.0169	0.121316
OALVG00000009016.1	A0A1S3HFY9	toll-like receptor 13	A0A1S3HFY9_LINUN	LOC106154554	Lingula unguis	PTHR24365:SF543	TOLL-LIKE RECEPTOR 13	PF13516.7^LRR_6^Leucine Rich repeat^17-32^E:6.4`PF00560.34^LRR_1^Leucine Rich Repeat^19-41^E:0.42`PF00560.34^LRR_1^Leucine Rich Repeat^43-54^E:26`PF13516.7^LRR_6^Leucine Rich repeat^44-54^E:590`PF00560.34^LRR_1^Leucine Rich Repeat^67-81^E:37`PF13516.7^LRR_6^Leucine Rich repeat^67-78^E:540`PF00560.34^LRR_1^Leucine Rich Repeat^94-108^E:160`PF13516.7^LRR_6^Leucine Rich repeat^95-103^E:1600`PF13676.7…	0.239551	0	0.0679683	0	0.0360904	0
OALVG00000009019.1	A0A1S3HFY9	toll-like receptor 13	A0A1S3HFY9_LINUN	LOC106154554	Lingula unguis	PTHR24365:SF543	TOLL-LIKE RECEPTOR 13	PF00560.34^LRR_1^Leucine Rich Repeat^159-159^E:9200`PF13516.7^LRR_6^Leucine Rich repeat^241-254^E:27`PF00560.34^LRR_1^Leucine Rich Repeat^244-254^E:400`PF00560.34^LRR_1^Leucine Rich Repeat^296-304^E:3500`PF00560.34^LRR_1^Leucine Rich Repeat^370-380^E:5200`PF13855.7^LRR_8^Leucine rich repeat^437-481^E:2.2e-06`PF13516.7^LRR_6^Leucine Rich repeat^444-459^E:16`PF13855.7^LRR_8^Leucine rich repeat^446-…	0.0415974	0	0.099284	0.159992	0	0
OALVG00000017092.1	A0A1S3HEQ8	toll-like receptor 13	A0A1S3HEQ8_LINUN	LOC106154249	Lingula unguis	PTHR24365:SF543	TOLL-LIKE RECEPTOR 13	PF13516.7^LRR_6^Leucine Rich repeat^1-9^E:270`PF00560.34^LRR_1^Leucine Rich Repeat^1-18^E:400`PF00560.34^LRR_1^Leucine Rich Repeat^22-38^E:7000`PF13855.7^LRR_8^Leucine rich repeat^45-104^E:4.6e-12`PF00560.34^LRR_1^Leucine Rich Repeat^50-58^E:13000`PF13306.7^LRR_5^BspA type Leucine rich repeat region (6 copies)^58-126^E:0.054`PF13516.7^LRR_6^Leucine Rich repeat^70-81^E:6.2`PF00560.34^LRR_1^Leucine…	0	0.0899277	0.114586	0.138537	0.0214774	0.0200155
OALVG00000017373.1	A0A1S3JYH7	toll-like receptor 13	A0A1S3JYH7_LINUN	LOC106177269	Lingula unguis	PTHR24365:SF543	TOLL-LIKE RECEPTOR 13	PF13855.7^LRR_8^Leucine rich repeat^3-54^E:2.6e-09`PF13306.7^LRR_5^BspA type Leucine rich repeat region (6 copies)^5-52^E:0.31`PF13516.7^LRR_6^Leucine Rich repeat^20-31^E:280`PF00560.34^LRR_1^Leucine Rich Repeat^22-40^E:1300`PF00560.34^LRR_1^Leucine Rich Repeat^43-59^E:3300`PF13516.7^LRR_6^Leucine Rich repeat^44-56^E:10000`PF13855.7^LRR_8^Leucine rich repeat^67-127^E:3.2e-11`PF00560.34^LRR_1^Leuc…	0.0712734	0.0623451	0.274622	0	0.177451	0.331542
OALVG00000018651.1	A0A1S3JYH7	toll-like receptor 13	A0A1S3JYH7_LINUN	LOC106177269	Lingula unguis	PTHR24365:SF543	TOLL-LIKE RECEPTOR 13	PF13855.7^LRR_8^Leucine rich repeat^2-49^E:2.3e-09`PF13516.7^LRR_6^Leucine Rich repeat^16-26^E:760`PF00560.34^LRR_1^Leucine Rich Repeat^17-35^E:390`PF13855.7^LRR_8^Leucine rich repeat^63-121^E:1.1e-09`PF00560.34^LRR_1^Leucine Rich Repeat^65-82^E:2900`PF13306.7^LRR_5^BspA type Leucine rich repeat region (6 copies)^76-168^E:1.4e-05`PF00560.34^LRR_1^Leucine Rich Repeat^87-105^E:25`PF13516.7^LRR_6^Le…	0.0173861	0.0887476	0.0117445	0	0.275922	0.153215
OALVG00000018653.1	A0A1S3JYH7	toll-like receptor 13	A0A1S3JYH7_LINUN	LOC106177269	Lingula unguis	PTHR24365:SF543	TOLL-LIKE RECEPTOR 13	PF13855.7^LRR_8^Leucine rich repeat^5-59^E:1.4e-09`PF13306.7^LRR_5^BspA type Leucine rich repeat region (6 copies)^9-59^E:0.054`PF13516.7^LRR_6^Leucine Rich repeat^26-35^E:140`PF00560.34^LRR_1^Leucine Rich Repeat^27-45^E:4.7`PF13855.7^LRR_8^Leucine rich repeat^72-130^E:1e-11`PF13516.7^LRR_6^Leucine Rich repeat^77-85^E:9000`PF12799.8^LRR_4^Leucine Rich repeats (2 copies)^97-131^E:2e-06`PF00560.34^…	0	0.0240446	0.046168	0	0.281929	0.438684
OALVG00000018654.1	A0A2R2MNA6	toll-like receptor 13	A0A2R2MNA6_LINUN	LOC106154248	Lingula unguis	PTHR24365:SF543	TOLL-LIKE RECEPTOR 13	PF13306.7^LRR_5^BspA type Leucine rich repeat region (6 copies)^11-143^E:2e-05`PF00560.34^LRR_1^Leucine Rich Repeat^23-42^E:760`PF13516.7^LRR_6^Leucine Rich repeat^46-59^E:30`PF00560.34^LRR_1^Leucine Rich Repeat^47-63^E:840`PF13855.7^LRR_8^Leucine rich repeat^55-102^E:3.2e-08`PF13516.7^LRR_6^Leucine Rich repeat^70-82^E:11`PF00560.34^LRR_1^Leucine Rich Repeat^71-87^E:54`PF13306.7^LRR_5^BspA type L…	0.0180039	0	0.0465662	0.0247748	0.0407111	0.011879
OALVG00000018657.1	A0A1S3JYH7	toll-like receptor 13	A0A1S3JYH7_LINUN	LOC106177269	Lingula unguis	PTHR24365:SF543	TOLL-LIKE RECEPTOR 13	PF13855.7^LRR_8^Leucine rich repeat^3-54^E:2.3e-09`PF13306.7^LRR_5^BspA type Leucine rich repeat region (6 copies)^5-57^E:0.31`PF13516.7^LRR_6^Leucine Rich repeat^21-30^E:630`PF00560.34^LRR_1^Leucine Rich Repeat^22-40^E:200`PF00560.34^LRR_1^Leucine Rich Repeat^43-59^E:2600`PF13855.7^LRR_8^Leucine rich repeat^67-126^E:3.4e-10`PF13306.7^LRR_5^BspA type Leucine rich repeat region (6 copies)^81-175^E…	0.0246121	0.0024324	0.181631	0.187096	0.133326	0.104063
OALVG00000018966.1	A0A1S3HFY9	toll-like receptor 13	A0A1S3HFY9_LINUN	LOC106154554	Lingula unguis	PTHR24365:SF543	TOLL-LIKE RECEPTOR 13	PF00560.34^LRR_1^Leucine Rich Repeat^230-244^E:660`PF13516.7^LRR_6^Leucine Rich repeat^230-240^E:390`PF13516.7^LRR_6^Leucine Rich repeat^283-292^E:2300`PF00560.34^LRR_1^Leucine Rich Repeat^284-293^E:2100`PF13516.7^LRR_6^Leucine Rich repeat^323-336^E:3500`PF13516.7^LRR_6^Leucine Rich repeat^351-361^E:710`PF00560.34^LRR_1^Leucine Rich Repeat^355-370^E:3900`PF13516.7^LRR_6^Leucine Rich repeat^376-38…	0	0.0272067	0	0	0.0388363	0
OALVG00000018967.1	A0A1S3HFY9	toll-like receptor 13	A0A1S3HFY9_LINUN	LOC106154554	Lingula unguis	PTHR24365:SF543	TOLL-LIKE RECEPTOR 13	PF13306.7^LRR_5^BspA type Leucine rich repeat region (6 copies)^83-150^E:0.31`PF00560.34^LRR_1^Leucine Rich Repeat^230-244^E:660`PF13516.7^LRR_6^Leucine Rich repeat^230-240^E:390`PF13516.7^LRR_6^Leucine Rich repeat^323-336^E:3500`PF13516.7^LRR_6^Leucine Rich repeat^351-361^E:710`PF00560.34^LRR_1^Leucine Rich Repeat^355-370^E:3900`PF13516.7^LRR_6^Leucine Rich repeat^376-384^E:3400`PF00560.34^LRR_1…	0	0	0	0	0	0
OALVG00000018968.1	A0A1S3HFY9	toll-like receptor 13	A0A1S3HFY9_LINUN	LOC106154554	Lingula unguis	PTHR24365:SF543	TOLL-LIKE RECEPTOR 13	PF13306.7^LRR_5^BspA type Leucine rich repeat region (6 copies)^83-150^E:0.31`PF00560.34^LRR_1^Leucine Rich Repeat^230-244^E:660`PF13516.7^LRR_6^Leucine Rich repeat^230-240^E:390`PF13516.7^LRR_6^Leucine Rich repeat^323-336^E:3500`PF13516.7^LRR_6^Leucine Rich repeat^351-361^E:710`PF00560.34^LRR_1^Leucine Rich Repeat^355-370^E:3900`PF13516.7^LRR_6^Leucine Rich repeat^376-384^E:3400`PF00560.34^LRR_1…	0	0	0	0	0	0
OALVG00000018970.1	A0A1S3HFY9	toll-like receptor 13	A0A1S3HFY9_LINUN	LOC106154554	Lingula unguis	PTHR24365:SF543	TOLL-LIKE RECEPTOR 13	PF00560.34^LRR_1^Leucine Rich Repeat^230-244^E:660`PF13516.7^LRR_6^Leucine Rich repeat^230-240^E:390`PF13516.7^LRR_6^Leucine Rich repeat^283-292^E:2300`PF00560.34^LRR_1^Leucine Rich Repeat^284-293^E:2100`PF13516.7^LRR_6^Leucine Rich repeat^323-336^E:3500`PF13516.7^LRR_6^Leucine Rich repeat^351-361^E:710`PF00560.34^LRR_1^Leucine Rich Repeat^355-370^E:3900`PF13516.7^LRR_6^Leucine Rich repeat^376-38…	0	0.0272067	0	0	0.0388363	0
OALVG00000019500.1	A0A1S3JYH7	toll-like receptor 13	A0A1S3JYH7_LINUN	LOC106177269	Lingula unguis	PTHR24365:SF543	TOLL-LIKE RECEPTOR 13	PF13855.7^LRR_8^Leucine rich repeat^20-74^E:9.1e-07`PF00560.34^LRR_1^Leucine Rich Repeat^20-28^E:2800`PF13516.7^LRR_6^Leucine Rich repeat^20-30^E:27`PF13306.7^LRR_5^BspA type Leucine rich repeat region (6 copies)^26-127^E:0.011`PF00560.34^LRR_1^Leucine Rich Repeat^42-63^E:0.14`PF13516.7^LRR_6^Leucine Rich repeat^42-52^E:28`PF00560.34^LRR_1^Leucine Rich Repeat^65-78^E:190`PF13516.7^LRR_6^Leucine R…	0	0	0.0325061	0.247794	0	0
OALVG00000029135.1	A0A1S3HFY9	toll-like receptor 13	A0A1S3HFY9_LINUN	LOC106154554	Lingula unguis	PTHR24365:SF543	TOLL-LIKE RECEPTOR 13	PF13516.7^LRR_6^Leucine Rich repeat^241-254^E:28`PF00560.34^LRR_1^Leucine Rich Repeat^244-254^E:400`PF13516.7^LRR_6^Leucine Rich repeat^268-283^E:13000`PF13516.7^LRR_6^Leucine Rich repeat^294-303^E:840`PF00560.34^LRR_1^Leucine Rich Repeat^296-304^E:3400`PF00560.34^LRR_1^Leucine Rich Repeat^370-379^E:6900`PF13516.7^LRR_6^Leucine Rich repeat^446-461^E:3.2`PF13855.7^LRR_8^Leucine rich repeat^448-506…	0.298861	0.110378	0.108525	0.306067	0.32433	0.155526
OALVG00000029413.1	A0A1S3JYH7	toll-like receptor 13	A0A1S3JYH7_LINUN	LOC106177269	Lingula unguis	PTHR24365:SF543	TOLL-LIKE RECEPTOR 13	PF13855.7^LRR_8^Leucine rich repeat^3-54^E:3.6e-09`PF13306.7^LRR_5^BspA type Leucine rich repeat region (6 copies)^5-52^E:0.19`PF13516.7^LRR_6^Leucine Rich repeat^21-31^E:63`PF00560.34^LRR_1^Leucine Rich Repeat^22-41^E:270`PF00560.34^LRR_1^Leucine Rich Repeat^43-59^E:2100`PF13855.7^LRR_8^Leucine rich repeat^67-126^E:4.4e-12`PF13306.7^LRR_5^BspA type Leucine rich repeat region (6 copies)^80-174^E:…	0.0450773	0	0.0213654	0	0	0.0827798
OALVG00000029442.1	A0A1S3JYH7	toll-like receptor 13	A0A1S3JYH7_LINUN	LOC106177269	Lingula unguis	PTHR24365:SF543	TOLL-LIKE RECEPTOR 13	PF13516.7^LRR_6^Leucine Rich repeat^20-30^E:2600`PF00560.34^LRR_1^Leucine Rich Repeat^22-40^E:910`PF13855.7^LRR_8^Leucine rich repeat^67-127^E:7.3e-09`PF00560.34^LRR_1^Leucine Rich Repeat^69-88^E:8100`PF13306.7^LRR_5^BspA type Leucine rich repeat region (6 copies)^82-173^E:0.0017`PF00560.34^LRR_1^Leucine Rich Repeat^92-107^E:71`PF13516.7^LRR_6^Leucine Rich repeat^92-103^E:93`PF13855.7^LRR_8^Leuci…	0	0.0265138	0.0954874	0	0	0
OALVG00000029444.1	A0A1S3JYH7	toll-like receptor 13	A0A1S3JYH7_LINUN	LOC106177269	Lingula unguis	PTHR24365:SF543	TOLL-LIKE RECEPTOR 13	PF13306.7^LRR_5^BspA type Leucine rich repeat region (6 copies)^126-201^E:1.5e-07`PF13855.7^LRR_8^Leucine rich repeat^132-182^E:9.6e-11`PF00560.34^LRR_1^Leucine Rich Repeat^132-144^E:11000`PF13516.7^LRR_6^Leucine Rich repeat^147-160^E:24`PF00560.34^LRR_1^Leucine Rich Repeat^148-170^E:68`PF13306.7^LRR_5^BspA type Leucine rich repeat region (6 copies)^235-313^E:0.2`PF13306.7^LRR_5^BspA type Leucine…	0	0.0381563	0.0187084	0	0.0500641	0.0485303
OALVG00000033233.1	A0A1S3HFY9	toll-like receptor 13	A0A1S3HFY9_LINUN	LOC106154554	Lingula unguis	PTHR24365:SF543	TOLL-LIKE RECEPTOR 13	PF13306.7^LRR_5^BspA type Leucine rich repeat region (6 copies)^78-163^E:9.9e-07`PF00560.34^LRR_1^Leucine Rich Repeat^90-100^E:530`PF00560.34^LRR_1^Leucine Rich Repeat^132-140^E:16000`PF00560.34^LRR_1^Leucine Rich Repeat^182-193^E:3000`PF00560.34^LRR_1^Leucine Rich Repeat^222-236^E:190`PF00560.34^LRR_1^Leucine Rich Repeat^246-255^E:4800`PF00560.34^LRR_1^Leucine Rich Repeat^276-284^E:5800`PF00560.…	0.797853	0	1.24827	1.58982	0.417007	0.0799789
OALVG00000033235.1	A0A1S3HFY9	toll-like receptor 13	A0A1S3HFY9_LINUN	LOC106154554	Lingula unguis	PTHR24365:SF543	TOLL-LIKE RECEPTOR 13	PF13306.7^LRR_5^BspA type Leucine rich repeat region (6 copies)^87-168^E:0.011`PF00560.34^LRR_1^Leucine Rich Repeat^137-145^E:3900`PF13516.7^LRR_6^Leucine Rich repeat^137-146^E:7600`PF13516.7^LRR_6^Leucine Rich repeat^228-241^E:43`PF00560.34^LRR_1^Leucine Rich Repeat^229-240^E:16`PF13516.7^LRR_6^Leucine Rich repeat^253-273^E:43`PF13516.7^LRR_6^Leucine Rich repeat^283-291^E:5600`PF13306.7^LRR_5^Bs…	0.923876	0	1.13439	0.349291	0	0
OALVG00000033286.1	A0A1S3JYH7	toll-like receptor 13	A0A1S3JYH7_LINUN	LOC106177269	Lingula unguis	PTHR24365:SF543	TOLL-LIKE RECEPTOR 13	PF13306.7^LRR_5^BspA type Leucine rich repeat region (6 copies)^3-94^E:4.8e-07`PF13855.7^LRR_8^Leucine rich repeat^4-53^E:5.5e-10`PF00560.34^LRR_1^Leucine Rich Repeat^19-41^E:500`PF13516.7^LRR_6^Leucine Rich repeat^19-31^E:4000`PF13306.7^LRR_5^BspA type Leucine rich repeat region (6 copies)^108-213^E:0.00022`PF13516.7^LRR_6^Leucine Rich repeat^139-151^E:360`PF13855.7^LRR_8^Leucine rich repeat^140…	0.183339	0.0232776	0.18311	0.339306	0.575499	0.860534
OALVG00000034185.1	A0A1S3HG32	toll-like receptor 13	A0A1S3HG32_LINUN	LOC106154242	Lingula unguis	PTHR24365:SF543	TOLL-LIKE RECEPTOR 13	PF13306.7^LRR_5^BspA type Leucine rich repeat region (6 copies)^65-163^E:6.4e-09`PF13855.7^LRR_8^Leucine rich repeat^71-120^E:6.3e-10`PF00560.34^LRR_1^Leucine Rich Repeat^71-83^E:12000`PF13855.7^LRR_8^Leucine rich repeat^87-140^E:9e-07`PF00560.34^LRR_1^Leucine Rich Repeat^87-109^E:530`PF13516.7^LRR_6^Leucine Rich repeat^87-99^E:1100`PF13306.7^LRR_5^BspA type Leucine rich repeat region (6 copies)^…	0.0230678	0.0214276	0.0661842	0.161029	0.12922	0.0448204
OALVG00000033196.1	K1P3K5	Toll-like receptor 2 type-2	K1P3K5_CRAGI	CGI_10013671	Crassostrea gigas (Pacific oyster) (Crassostrea angulata)	PTHR24365:SF543	TOLL-LIKE RECEPTOR 13	PF00560.34^LRR_1^Leucine Rich Repeat^114-124^E:15000`PF00560.34^LRR_1^Leucine Rich Repeat^183-192^E:8500`PF00560.34^LRR_1^Leucine Rich Repeat^212-224^E:2800`PF00560.34^LRR_1^Leucine Rich Repeat^239-260^E:710`PF13855.7^LRR_8^Leucine rich repeat^265-324^E:3.5e-11`PF13306.7^LRR_5^BspA type Leucine rich repeat region (6 copies)^265-320^E:0.093`PF00560.34^LRR_1^Leucine Rich Repeat^292-310^E:22`PF00560…	0.326691	0.240676	0.254083	0.427364	0.898138	0.739784
OALVG00000018961.1	A0A2R2MN15	toll-like receptor 4	A0A2R2MN15_LINUN	LOC106160819	Lingula unguis	PTHR24365:SF17	TOLL-LIKE RECEPTOR 2	PF13676.7^TIR_2^TIR domain^1-98^E:2.9e-11`PF01582.21^TIR^TIR domain^4-114^E:9.9e-15`PF00040.20^fn2^Fibronectin type II domain^200-243^E:1.9e-10	0.249525	0.379074	0	0	0.0496015	0.0467416
OALVG00000002062.1	R7TE68	TIR domain-containing protein	R7TE68_CAPTE	CAPTEDRAFT_220369	Capitella teleta (Polychaete worm)	PTHR24365:SF521	TOLL-LIKE RECEPTOR 4	PF13516.7^LRR_6^Leucine Rich repeat^8-20^E:1800`PF00560.34^LRR_1^Leucine Rich Repeat^10-56^E:1400`PF13306.7^LRR_5^BspA type Leucine rich repeat region (6 copies)^31-89^E:0.0032`PF00560.34^LRR_1^Leucine Rich Repeat^59-69^E:920`PF13516.7^LRR_6^Leucine Rich repeat^118-128^E:1000`PF00560.34^LRR_1^Leucine Rich Repeat^118-129^E:7600`PF13516.7^LRR_6^Leucine Rich repeat^143-153^E:16`PF00560.34^LRR_1^Leuc…	0.0362642	0	0.0618378	0.224179	0	0.0236306
OALVG00000003563.1	R7TE68	TIR domain-containing protein	R7TE68_CAPTE	CAPTEDRAFT_220369	Capitella teleta (Polychaete worm)	PTHR24365:SF521	TOLL-LIKE RECEPTOR 4	PF13306.7^LRR_5^BspA type Leucine rich repeat region (6 copies)^64-161^E:0.041`PF13516.7^LRR_6^Leucine Rich repeat^64-75^E:200`PF00560.34^LRR_1^Leucine Rich Repeat^66-83^E:480`PF13855.7^LRR_8^Leucine rich repeat^87-144^E:3.2e-11`PF13516.7^LRR_6^Leucine Rich repeat^88-100^E:1100`PF00560.34^LRR_1^Leucine Rich Repeat^89-110^E:190`PF13516.7^LRR_6^Leucine Rich repeat^109-124^E:11`PF13855.7^LRR_8^Leuci…	0.0242529	0	0.355406	0.119454	0.0304102	0.271859
OALVG00000003565.1	R7TE68	TIR domain-containing protein	R7TE68_CAPTE	CAPTEDRAFT_220369	Capitella teleta (Polychaete worm)	PTHR24365:SF521	TOLL-LIKE RECEPTOR 4	PF13855.7^LRR_8^Leucine rich repeat^2-56^E:2.6e-11`PF13516.7^LRR_6^Leucine Rich repeat^2-12^E:2300`PF00560.34^LRR_1^Leucine Rich Repeat^4-22^E:240`PF13516.7^LRR_6^Leucine Rich repeat^21-36^E:19`PF00560.34^LRR_1^Leucine Rich Repeat^25-45^E:27`PF00560.34^LRR_1^Leucine Rich Repeat^48-60^E:5100`PF13516.7^LRR_6^Leucine Rich repeat^48-57^E:18000`PF13516.7^LRR_6^Leucine Rich repeat^146-159^E:110`PF00560…	0.00812409	0	0.0209151	0.044872	0	0
[truncated: 195 more rows]

## Sheet: Supp Table 17
Supplementary Table 17. Pattern recognition receptors in R. pachyptila
[truncated: 157 more rows]

[truncated: 7 more sheets: Supp Table 18, Supp Table 19, Supp Table 20, Supp Table 21, Supp Table 22, Supp Table 23, Supp Table 24]
